# Supplementary material for: Hydroboration of isocyanates: cobalt-catalyzedvs.catalyst-free approaches
Source: Royal Society of Chemistry journal article supplement (doi:10.1039/d2ob01192a), 2022-01-01
Supplement: d2ob01192a1.pdf [file d2ob01192a1.pdf]

## Supporting Information

to the manuscript

### Hydroboration of Isocyanates: Cobalt-Catalyzed vs. Catalyst-Free Approaches

by Kristina A. Gudun,<sup>a</sup> Samat Tussupbayev,<sup>b</sup> Ainur Slamova,<sup>c</sup> and Andrey Y. Khalimon<sup>\*,a,d</sup>

<sup>a</sup> Department of Chemistry, School of Sciences and Humanities, Nazarbayev University, 53 Kabanbay Batyr Avenue, Nur-Sultan 010000, Kazakhstan.

<sup>b</sup> Institute of Polymer Materials and Technologies, 3/1 Atyrau 1, Almaty 050019, Kazakhstan

<sup>c</sup> Core Facilities, Office of the Provost, Nazarbayev University, 53 Kabanbay Batyr Avenue, Nur-Sultan 010000, Kazakhstan.

<sup>d</sup> The Environment and Resource Efficiency Cluster (EREC), Nazarbayev University, 53 Kabanbay Batyr Avenue, Nur-Sultan 010000, Kazakhstan.

\*E-mail: [andrey.khalimon@nu.edu.kz](mailto:andrey.khalimon@nu.edu.kz) (A.Y.K.)

#### Table of Contents:

|    |                                                                                  |        |
|----|----------------------------------------------------------------------------------|--------|
| 1. | Experimental details                                                             | 2-5    |
| 2. | NMR data for isolated formamides                                                 | 6      |
| 3. | NMR data for isolated N-methylamine hydrochlorides                               | 7      |
| 4. | NMR spectra for N-borylformamides (taken directly from reaction mixtures)        | 8-22   |
| 5. | NMR spectra for isolated formamides                                              | 23-26  |
| 6. | NMR spectra for borylated N-methylamines (taken directly from reaction mixtures) | 27-42  |
| 7. | NMR spectra for isolated methylamine hydrochloride salts                         | 43-48  |
| 8. | Computational details and data                                                   | 49-98  |
| 9. | References                                                                       | 99-100 |

## 1. Experimental details

All manipulations were carried out using conventional inert atmosphere glovebox and Schlenk techniques. Toluene and C<sub>6</sub>D<sub>6</sub> were dried by distillation from sodium. EtOAc, hexanes, MeOH, CDCl<sub>3</sub>, DMSO-d<sub>6</sub>, MeOH-d<sub>4</sub>, Co(acac)<sub>2</sub>, dpephos, HBPIn, HBCat, Et<sub>3</sub>SiH, PhSiH<sub>3</sub>, 4 M HCl in dioxane, 4 M HCl in diethyl ether, 1,3,5-trimethoxybenzene, all isocyanates and organic substrates for chemoselectivity tests were purchased from Sigma-Aldrich (Merk) and used without further purification. NMR spectra were obtained with JEOL ECA-500 MHz spectrometer (<sup>1</sup>H: 500 MHz, <sup>13</sup>C: 126 MHz, <sup>31</sup>P: 202 MHz, <sup>11</sup>B: 160 MHz and <sup>19</sup>F: 471 MHz). All catalytic hydroboration reactions were performed under inert atmosphere using either NMR tubes equipped with Teflon valves (J. Young NMR tubes) or 10 and/or 20 mL pressure vials (Supelco headspace vials) equipped with magnetic screw caps having PTFE-faced butyl septa. For details of computational studies, see section 8 below.

### General procedure for monohydroboration of isocyanates to formamides

**Conditions A.** HBPIn (1.0 or 3.5 equiv.) was added to an isocyanate substrate (0.2 mmol) in a pressure vial, which was sealed with a magnetic screw cap having PTFE-faced butyl septum. The mixture was left with stirring at room temperature for 24 hours. Then a solution of 1,3,5-trimethoxybenzene (internal standard; 6.7 mg, 0.04 mmol, 0.2 equiv.) in 0.6 mL of benzene-d<sub>6</sub> was added, and the resulting mixture was transferred to an NMR tube for analysis.

**Conditions B.** A mixture of Co(acac)<sub>2</sub> (2 mol%), dpephos (2 mol%), isocyanate (0.2 or 1.0 mmol) and HBPIn (1 equiv.; 0.2 or 1.0 mmol) in either benzene-d<sub>6</sub> (0.6 mL, 0.33 M; for NMR reactions with 0.2 mmol of the substrate) or toluene (1.4 mL; 0.7 M; for reactions in pressure vials with 1.0 mmol of the substrate) was left with stirring for 24 hours at 60 °C. For NMR scale reactions (with 0.2 mmol of the substrate), conversions of isocyanates to N-borylformamides were determined by <sup>1</sup>H-NMR using 1,3,5-trimethoxybenzene as internal standard (6.7 mg, 0.04 mmol, 0.2 equiv.). For reactions in pressure vials with 1.0 mmol of the substrate, isolated yields of formamides were determined. The solvent was removed under reduced pressure, and the residue was treated with 5 mL of methanol at room temperature overnight. All volatiles were pumped off, and the products were purified by column chromatography with silica gel using EtOAc/hexanes (1/1) as an eluent. The yields and the spectroscopic data for isolated formamides can be found below (see section 2). NMR spectra of N-borylformamides (taken directly from the reaction mixtures) and isolated formamide products can be found in sections 4 and 5, respectively.

### General procedure for deoxygenative hydroboration of isocyanates to N-methylamines

**Conditions A.** HBPIn (101.6 μL, 0.7 mmol, 3.5 equiv.) was added to an isocyanate substrate (0.2 mmol) in a pressure vial. The mixture was left with stirring for 24 hours at either 25, 50 or 70 °C, depending on the substrates used. Then a solution of 1,3,5-trimethoxybenzene (internal standard; 6.7 mg, 0.04 mmol, 0.2 equiv.) in 0.6 mL of benzene-d<sub>6</sub> was added, and the resulting mixture was transferred to an NMR tube for analysis. NMR conversions of isocyanates to borylated N-methylamines were determined by integration of <sup>1</sup>H-NMR spectra against resonances of 1,3,5-trimethoxybenzene.

**Conditions B.** A mixture of Co(acac)<sub>2</sub> (4 mol%), dpephos (4 mol%), isocyanate (0.2 or 0.5 mmol) and HBPIn (3.5-6 equiv., depending on the substrate used) in either benzene-d<sub>6</sub> (0.6 mL, 0.33 M for NMR scale reactions with 0.2 mmol of the substrate, or 0.7 mL, 0.7 M for reactions in pressure vials with 0.5 mmol of the substrate) was left with stirring for 24-48 h hours at 70-80 °C (depending on the substrate used). For NMR scale reactions (with 0.2 mmol of the substrate), conversions of isocyanates to borylated N-methylamines were determined by <sup>1</sup>H-NMR using

1,3,5-trimethoxybenzene as internal standard (6.7 mg, 0.04 mmol, 0.2 equiv.). For reactions in pressure vials with 0.5 mmol of the substrate, N-methylamines were isolated as the corresponding hydrochloride salts. For this, the obtained mixture was treated with 2.5 equivalents of HCl (as 4 M solution of HCl in either dioxane or diethyl ether) for 1 hour at room temperature. All volatiles were pumped off, and the residue was washed with cold (-20 °C) Et<sub>2</sub>O (5x4 mL) to give solid products, which were dried in vacuum. The yields and the spectroscopic data for isolated N-methylamine hydrochlorides can be found in section 3 below. NMR spectra of borylated N-methylamines (taken directly from the reaction mixtures) and isolated N-methylamine hydrochloride products can be found in sections 6 and 7, respectively.

#### **Mercury drop test for monohydroboration of PhNCO**

The reaction was performed according to the above procedure for catalytic hydroboration of isocyanates to N-borylformamides using 0.29 mmol (34.5 mg, 31.5 μL) of PhNCO, 0.29 mmol (37.7 mg, 42.7 μL) of HBPin and 2.0 mol% of Co(acac)<sub>2</sub>/dpephos in 0.9 mL of C<sub>6</sub>D<sub>6</sub>. All components were mixed in a pressure vial and a drop of Hg (313 mg) was added to the reaction mixture. The reaction was left with intensive stirring for 24 h at 60 °C. Then, 1,3,5-trimethoxybenzene was added as internal standard (9.8 mg, 0.058 mmol, 0.2 equiv. to PhNCO) and the reaction mixture was analysed by <sup>1</sup>H-NMR showing 95% conversion of PhNCO to the corresponding N-borylformamide, PhN(BPin)COH.

#### **General procedure for competitive Co(acac)<sub>2</sub>/dpephos-catalyzed hydroboration of PhNCO.**

**Monohydroboration to N-borylformamides.** Both catalyst-free and catalytic competitive monohydroboration reactions were performed according to above procedures for conversion of isocyanates to N-borylformamides using 0.2 mmol (23.8 mg, 21.7 μL) of PhNCO, 0.2 mmol of competing substrates, either 0.2 mmol (25.6 mg, 29.0 μL) or 0.7 mmol (89.6 mg, 101.6 μL) of HBPin (for catalytic and catalyst-free reactions, respectively), and 2 mol% (0.004 mmol) of Co(acac)<sub>2</sub>/dpephos (for catalytic reactions) in 0.6 mL of C<sub>6</sub>D<sub>6</sub> (for catalytic reactions). Catalyst-free transformations were performed under neat conditions. All components were mixed in either an NMR tube or in a pressure vial. The reactions were left at either room temperature or at 60 °C for 24 hours and then 1,3,5-trimethoxybenzene (6.7 mg, 0.04 mmol, 0.2 equiv. to PhNCO) was added as internal standard and the reaction mixtures were checked by <sup>1</sup>H-NMR to determine conversions of PhNCO and competing substrates. Note, for catalyst-free and solvent-free transformations, 0.6 mL of C<sub>6</sub>D<sub>6</sub> were added for NMR analysis of the reaction mixtures. The results of these tests are summarized in the Table 2 in the main text of the manuscript.

**Hydroboration to borylated N-methylamines.** Both catalyst-free and catalytic competitive monohydroboration reactions were performed according to above procedures for conversion of isocyanates to borylated N-methylamines using 0.2 mmol (23.8 mg, 21.7 μL) of PhNCO, 0.2 mmol of competing substrates, 0.6 mmol (76.8 mg, 87.1 μL) of HBPin, and 4 mol% (0.008 mmol) of Co(acac)<sub>2</sub>/dpephos (for catalytic reactions) in 0.6 mL of C<sub>6</sub>D<sub>6</sub> (for catalytic reactions). Catalyst-free transformations were performed under neat conditions. All components were mixed in either an NMR tube or in a pressure vial. The reactions were left at 70 °C for 24 hours and then 1,3,5-trimethoxybenzene (6.7 mg, 0.04 mmol, 0.2 equiv. to PhNCO) was added as internal standard and the reaction mixtures were checked by <sup>1</sup>H-NMR to determine conversions of PhNCO and competing substrates. Note, for catalyst-free and solvent-free transformations, 0.6 mL of C<sub>6</sub>D<sub>6</sub> were added for NMR analysis of the reaction mixtures. The results of these tests are summarized in the Table 3 in the main text of the manuscript.

### Attempts for reduction of PhNCO with HBCat, PhSiH<sub>3</sub> and Et<sub>3</sub>SiH.

The reactions of PhNCO with HBCat, PhSiH<sub>3</sub> and Et<sub>3</sub>SiH were performed analogously to experiments with HBPIn using both catalytic and catalyst-free conditions for monohydroboration and deoxygenative hydroboration of isocyanates to formamides and N-methylamines, respectively (see above). The results of these trials are summarized in the table below (where applicable, NMR conversions using 1,3,5-trimethoxybenzene as internal standard are shown).

| Reducing agent (equivalents)     | Conditions                                                       | Result                                                                                                          |
|----------------------------------|------------------------------------------------------------------|-----------------------------------------------------------------------------------------------------------------|
| PhSiH <sub>3</sub> (1 equiv.)    | 2% Co(acac) <sub>2</sub> /dpephos, 60 °C, 24 h, Solvent: toluene | No reaction was observed by <sup>1</sup> H-NMR                                                                  |
| PhSiH <sub>3</sub> (1 equiv.)    | Catalyst-free / solvent-free, room temperature, 24 h             | No reaction was observed by <sup>1</sup> H-NMR                                                                  |
| Et <sub>3</sub> SiH (1 equiv.)   | 2% Co(acac) <sub>2</sub> /dpephos, 60 °C, 24 h, Solvent: toluene | Formation of 4% of formamide product was observed by <sup>1</sup> H-NMR                                         |
| Et <sub>3</sub> SiH (3.5 equiv.) | 4% Co(acac) <sub>2</sub> /dpephos, 70 °C, 24 h, Solvent: toluene | Formation of 35% of PhN(SiEt <sub>3</sub> )Me and 9% of formamide product was observed by <sup>1</sup> H-NMR    |
| HBCat (1 equiv.)                 | 2% Co(acac) <sub>2</sub> /dpephos, 60 °C, 24 h, Solvent: toluene | Formation of 17% of formamide product was observed by <sup>1</sup> H-NMR                                        |
| HBCat (3.5 equiv.)               | Catalyst-free / solvent-free, room temperature, 24 h             | Formation of PhN(BCat)CH <sub>3</sub> (49%) was observed by <sup>1</sup> H-NMR. No other products were detected |
| HBCat (3.5 equiv.)               | 4% Co(acac) <sub>2</sub> /dpephos, 70 °C, 24 h, Solvent: toluene | Formation of PhN(BCat)CH <sub>3</sub> (80%) was observed by <sup>1</sup> H-NMR. No other products were detected |

**Monohydroboration of PhNCO with HBPIn using Co(acac)<sub>2</sub>/PPh<sub>3</sub> (1/2 ratio) as pre-catalyst.**

The reaction was done analogously to Co(acac)<sub>2</sub>/dpephos-catalyzed experiment (see above) using 2 mol% of Co(acac)<sub>2</sub> and 4 mol% of PPh<sub>3</sub> as a pre-catalyst system. NMR analysis of the reaction mixture after 24 h at 60 °C showed formation of 69% of N-borylformamide product PhN(BPin)C(O)H and 4% of N,O-bis(boryl)hemiaminal PhN(BPin)CH<sub>2</sub>OBPin (determined by <sup>1</sup>H-NMR using 1,3,5-trimethoxybenzene as internal standard).

**Deoxygenative hydroboration of PhNCO with 3.5 equiv. of HBPIn using Co(acac)<sub>2</sub>/PPh<sub>3</sub> (1/2 ratio) as pre-catalyst.**

The reaction was done analogously to Co(acac)<sub>2</sub>/dpephos-catalyzed experiment (see above) using 4 mol% of Co(acac)<sub>2</sub> and 8 mol% of PPh<sub>3</sub> as a pre-catalyst system. NMR analysis of the reaction mixture after 24 h at 70 °C showed formation of 74% of PhN(BPin)Me and 24% of N-borylformamide product PhN(BPin)C(O)H (determined by <sup>1</sup>H-NMR using 1,3,5-trimethoxybenzene as internal standard).

**Monohydroboration of PhNCO with HBPIn using (dppe)CoCl<sub>2</sub> as pre-catalyst.**

The reaction was done analogously to Co(acac)<sub>2</sub>/dpephos-catalyzed experiment (see above) using 2 mol% of (dppe)CoCl<sub>2</sub> as a pre-catalyst, which was activated with 4 mol% of LiBHET<sub>3</sub> prior to addition of the substrate. NMR analysis of the reaction mixture after 24 h at 60 °C showed formation of 27% of N-borylformamide product PhN(BPin)C(O)H and 10% of N,O-bis(boryl)hemiaminal PhN(BPin)CH<sub>2</sub>OBPin (determined by <sup>1</sup>H-NMR using 1,3,5-trimethoxybenzene as internal standard).

## 2. NMR data for isolated formamides

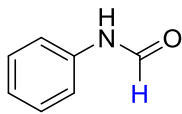

**N-phenylformamide (3'a):**<sup>1</sup> Yield 59%. A mixture of rotamers (approx. 1:1 ratio) was obtained. <sup>1</sup>H-NMR (CDCl<sub>3</sub>, 500 MHz): δ = 8.70 (d, *J* = 11.4 Hz, 1H), 8.38 (d, *J* = 1.1 Hz, 1H), 8.29 (br s, 1H), 7.54 (d, *J* = 7.7 Hz, 2H), 7.43 (br s, 1H), 7.32-7.38 (m, 4H), 7.19 (t, *J* = 7.5 Hz, 1H), 7.14 (t, *J* = 7.4 Hz, 1H), 7.10 ppm (d, *J* = 7.7 Hz, 2H). <sup>13</sup>C{<sup>1</sup>H}-NMR (CDCl<sub>3</sub>, 126 MHz): δ = 162.9 (s), 159.4 (s), 136.9 (s), 136.8 (s), 129.9 (s), 129.2 (s), 125.5 (s), 125.0 (s), 120.2 (s), 119.0 ppm (s).

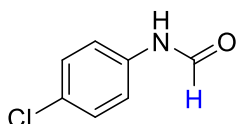

**N-(4-chlorophenyl)formamide (3'b):**<sup>2,3</sup> Yield 65%. A mixture of rotamers (approx. 1:1.5 ratio) was obtained. Major rotamer: <sup>1</sup>H NMR (CDCl<sub>3</sub>, 500 MHz): δ = 8.38 (s, 1H), 7.50 (d, *J* = 8.8 Hz, 2H), 7.30 (d, *J* = 8.8 Hz, 2H), 7.25 ppm (br s, 1H). <sup>13</sup>C{<sup>1</sup>H}-NMR (CDCl<sub>3</sub>, 126 MHz): δ = 158.9 (s), 135.5 (s), 129.3 (s), 121.3 ppm (s). Minor rotamer: <sup>1</sup>H NMR (CDCl<sub>3</sub>, 500 MHz): δ = 8.65 (d, *J* = 11.3 Hz, 1H), 7.95 (br s, 1H), 7.34 (d, *J* = 8.7 Hz, 2H), 7.03 ppm (d, *J* = 8.7 Hz, 2H). <sup>13</sup>C{<sup>1</sup>H}-NMR (CDCl<sub>3</sub>, 126 MHz): δ = 162.2 (s), 135.30 (s), 131.0 (s), 130.0 (s), 120.3 ppm (s).

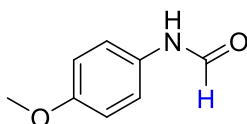

**N-(4-methoxyphenyl)formamide (3'f):**<sup>4</sup> Yield 69%. A mixture of rotamers (approx. 1:1.1 ratio) was obtained. Major rotamer: <sup>1</sup>H-NMR (CDCl<sub>3</sub>, 500MHz): δ = 8.33 (s, 1H), 7.95 (br s, 1H), 7.45 (d, *J* = 9.0 Hz, 2H), 6.87 – 6.84 (m, 2H), 3.78 ppm (s, 3H). <sup>13</sup>C{<sup>1</sup>H}-NMR (CDCl<sub>3</sub>, 126 MHz): δ = 159.5 (s), 157.8 (s), 129.5 (s), 122.11 (s), 121.8 (s), 114.3 (s), 55.6 ppm (s). Minor rotamer: <sup>1</sup>H-NMR (CDCl<sub>3</sub>, 500MHz): δ = 8.50 (d, *J* = 11.5 Hz, 1H), 8.30 (br s, 1H), 7.04 (d, *J* = 8.9 Hz, 2H), 6.90 – 6.87 (m, 2H), 3.80 ppm (s, 3H). <sup>13</sup>C{<sup>1</sup>H}-NMR (CDCl<sub>3</sub>, 126 MHz): δ = 163.3 (s), 157.0 (s), 129.8 (s), 122.1 (s), 115.0 (s), 55.7 ppm (s).

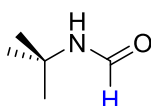

**N-tert-butylformamide (3'k):**<sup>5</sup> Yield 53%. A mixture of rotamers (1:1) was obtained. <sup>1</sup>H-NMR (CDCl<sub>3</sub>, 500MHz): δ = 8.27 (d, *J* = 12.4 Hz, 1H), 8.03 (s, 1H), 5.94 (br s, 1H), 5.31 (br s, 1H), 1.37 (s, 12H), 1.33 ppm (s, 12H). <sup>13</sup>C{<sup>1</sup>H}-NMR (CDCl<sub>3</sub>, 126 MHz): δ = 163.0 (s), 160.6 (s), 51.5 (s), 50.5 (s), 31.1 (s), 29.1 ppm (s).

### 3. NMR data for isolated N-methylamine hydrochlorides

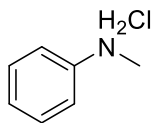

**N-methylaniline hydrochloride (5'a):**<sup>6,7,8</sup> Yield 78%. A mixture of rotamers (approx. 1:1 ratio) was obtained. <sup>1</sup>H-NMR (CD<sub>3</sub>OD, 500 MHz):  $\delta$  = 7.53-7.60 (m, 5H), 4.92 (br s, 2H), 3.08 ppm (s, 3H). <sup>13</sup>C{<sup>1</sup>H}-NMR (CD<sub>3</sub>OD, 126 MHz):  $\delta$  = 138.2 (s), 131.6 (s), 131.0 (s), 123.2 (s), 37.9 ppm (s).

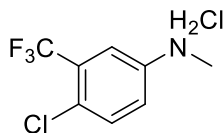

**4-chloro-3-(trifluoromethyl)-N-methylaniline hydrochloride (5'c):** Yield 68%. <sup>1</sup>H NMR (CDCl<sub>3</sub>, 500 MHz):  $\delta$  = 7.24 (s, 1H), 6.91 (d, *J* = 2.8 Hz, 1H), 6.70 (dd, *J* = 8.7, 2.7 Hz, 1H), 4.94 (br s, 1H), 2.84 ppm (s, 3H). <sup>13</sup>C{<sup>1</sup>H}-NMR (CDCl<sub>3</sub>, 126 MHz):  $\delta$  = 146.96 (s), 132.17 (s), 128.87 (q, *J* = 30.8 Hz), 124.16 (s), 121.99 (s), 116.84 (s), 111.78 (d, *J* = 5.6 Hz), 31.22 ppm (s). <sup>19</sup>F-NMR (CDCl<sub>3</sub>, 471 MHz):  $\delta$  = -62.64 ppm (s).

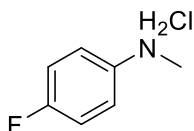

**4-fluoro-N-methylaniline hydrochloride (5'd):**<sup>7,9</sup> Yield 72%. <sup>1</sup>H NMR (CDCl<sub>3</sub>, 500 MHz):  $\delta$  = 11.6 (br s, 2H), 7.68 (br m, 2H), 7.15 (br m, 2H), 3.15 ppm (s, 3H). <sup>1</sup>H NMR (CD<sub>3</sub>OD, 500 MHz):  $\delta$  = 7.55-7.58 (m, 2H), 7.19-7.47 (m, 2H), 4.91 (br s, 2H), 3.07 ppm (s, 3H). <sup>13</sup>C{<sup>1</sup>H}-NMR (CDCl<sub>3</sub>, 126 MHz):  $\delta$  = 163.16 (d, *J* = 250.7 Hz), 133.15 (br s), 126.95 (d, *J* = 9.1 Hz), 117.62 (d, *J* = 23.3 Hz), 40.16 ppm (s). <sup>19</sup>F-NMR (CDCl<sub>3</sub>, 471 MHz):  $\delta$  = -110.03 ppm (s).

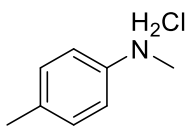

**4-methyl-N-methylaniline hydrochloride (5'e):**<sup>6,7,10,11</sup> Yield 88%. <sup>1</sup>H NMR (CDCl<sub>3</sub>, 500 MHz):  $\delta$  = 11.42 (br s, 2H), 7.55 (br d, *J* = 6.4 Hz, 2H), 7.24 (br d, *J* = 6.3 Hz, 2H), 3.17 (br s, 3H), 2.36 ppm (s, 3H). <sup>13</sup>C{<sup>1</sup>H}-NMR (CDCl<sub>3</sub>, 126 MHz):  $\delta$  = 193.8 (s), 134.6 (s), 130.8 (s), 124.4 (s), 39.8 (s), 21.1 ppm (s). NMR data are consistent with those previously reported in the literature.<sup>10</sup>

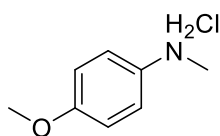

**4-methoxy-N-methylaniline hydrochloride (5'f):**<sup>6,7,12</sup> Yield 90%. <sup>1</sup>H NMR (CDCl<sub>3</sub>, 500 MHz):  $\delta$  = 11.33 (br s, 2H), 7.57 (br d, *J* = 7.0 Hz, 2H), 6.92 (br d, *J* = 7.0 Hz, 2H), 3.80 (s, 3H), 3.09 ppm (br s, 3H). <sup>13</sup>C{<sup>1</sup>H}-NMR (CDCl<sub>3</sub>, 126 MHz):  $\delta$  = 160.2 (s), 129.8 (s), 125.3 (s), 115.4 (s), 55.7 (s), 39.5 ppm (s).

#### 4. NMR spectra for N-borylformamides (taken directly from reaction mixtures)

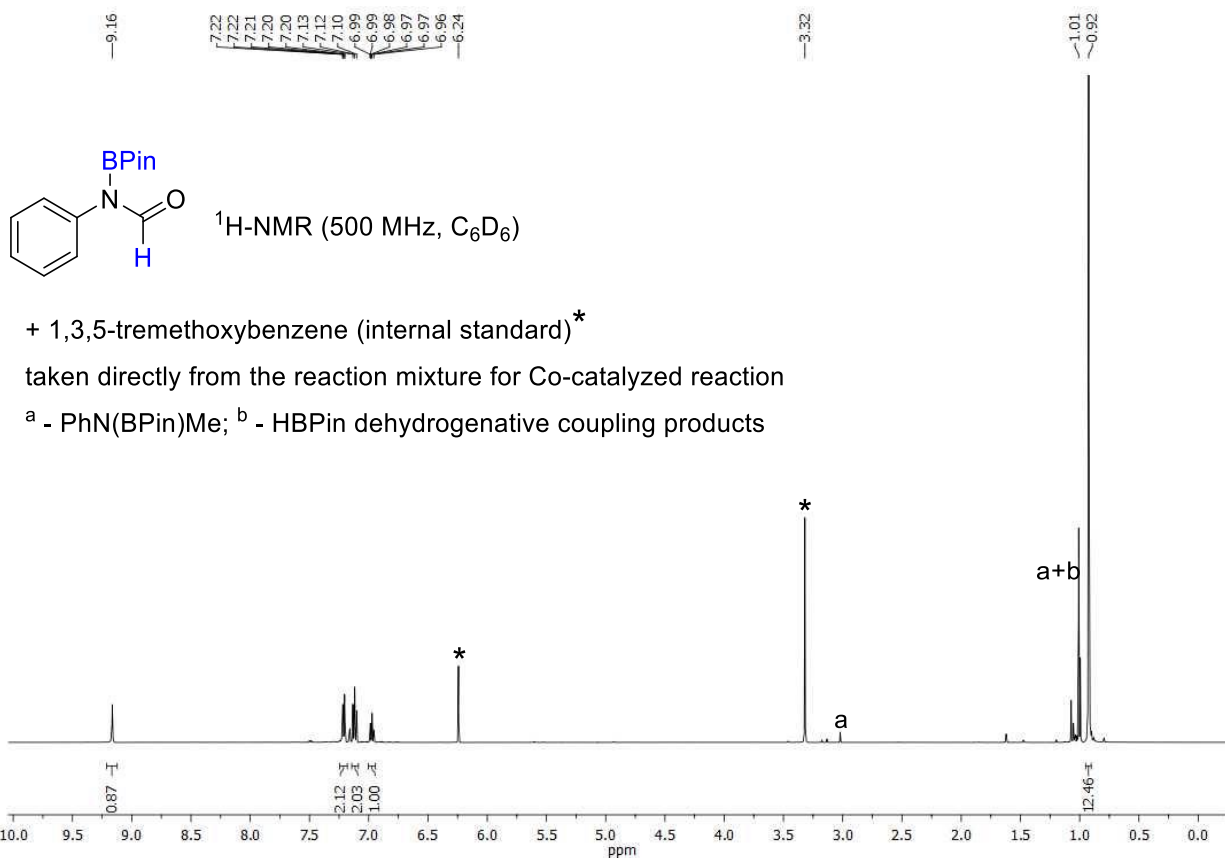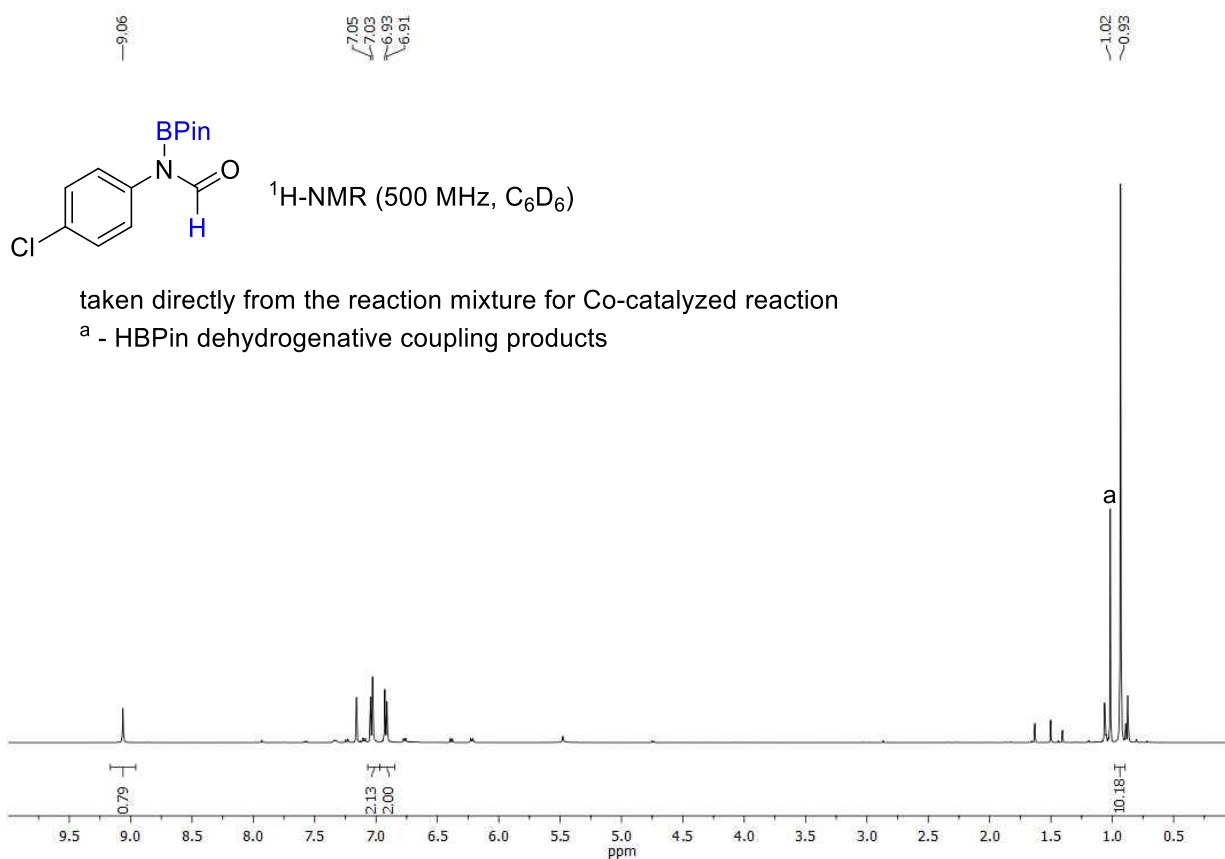



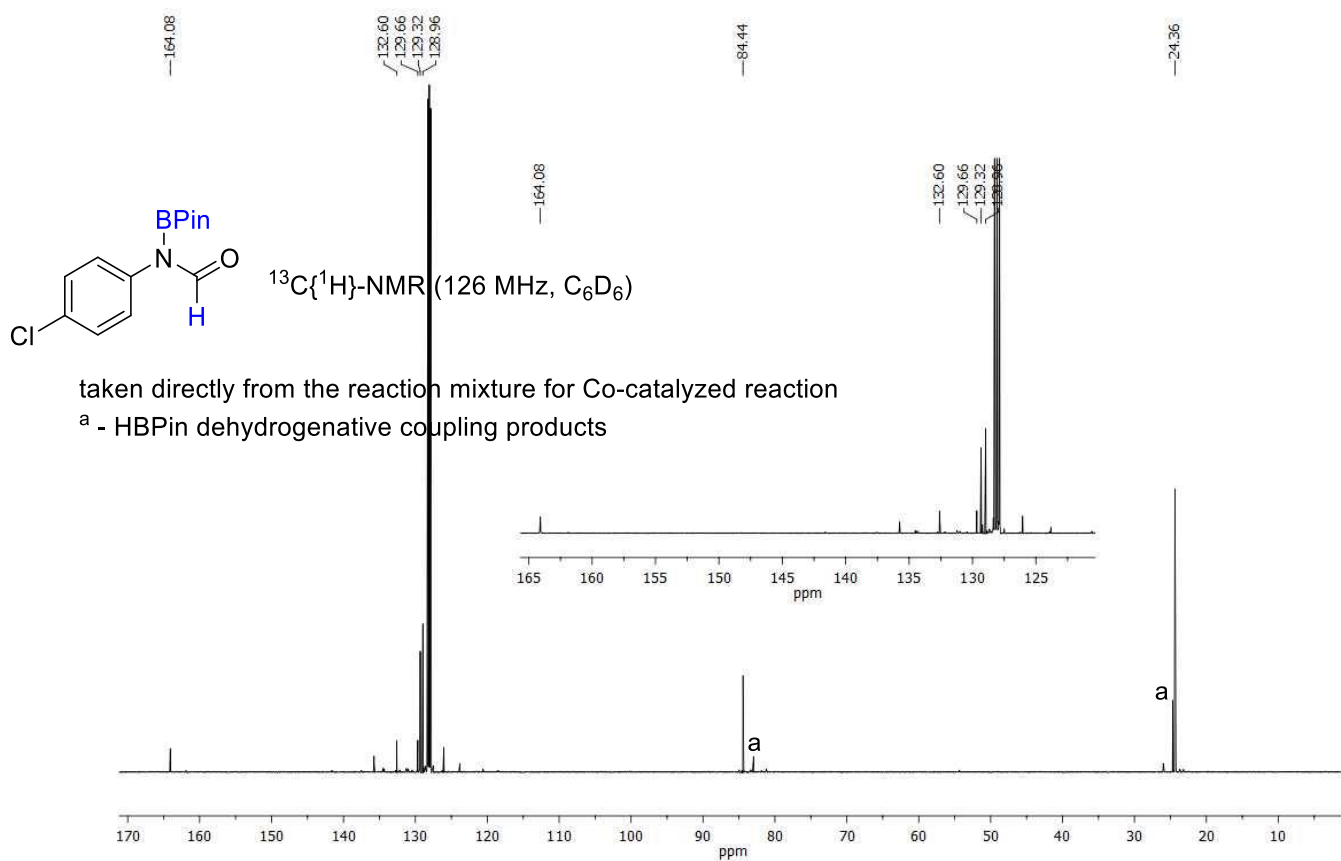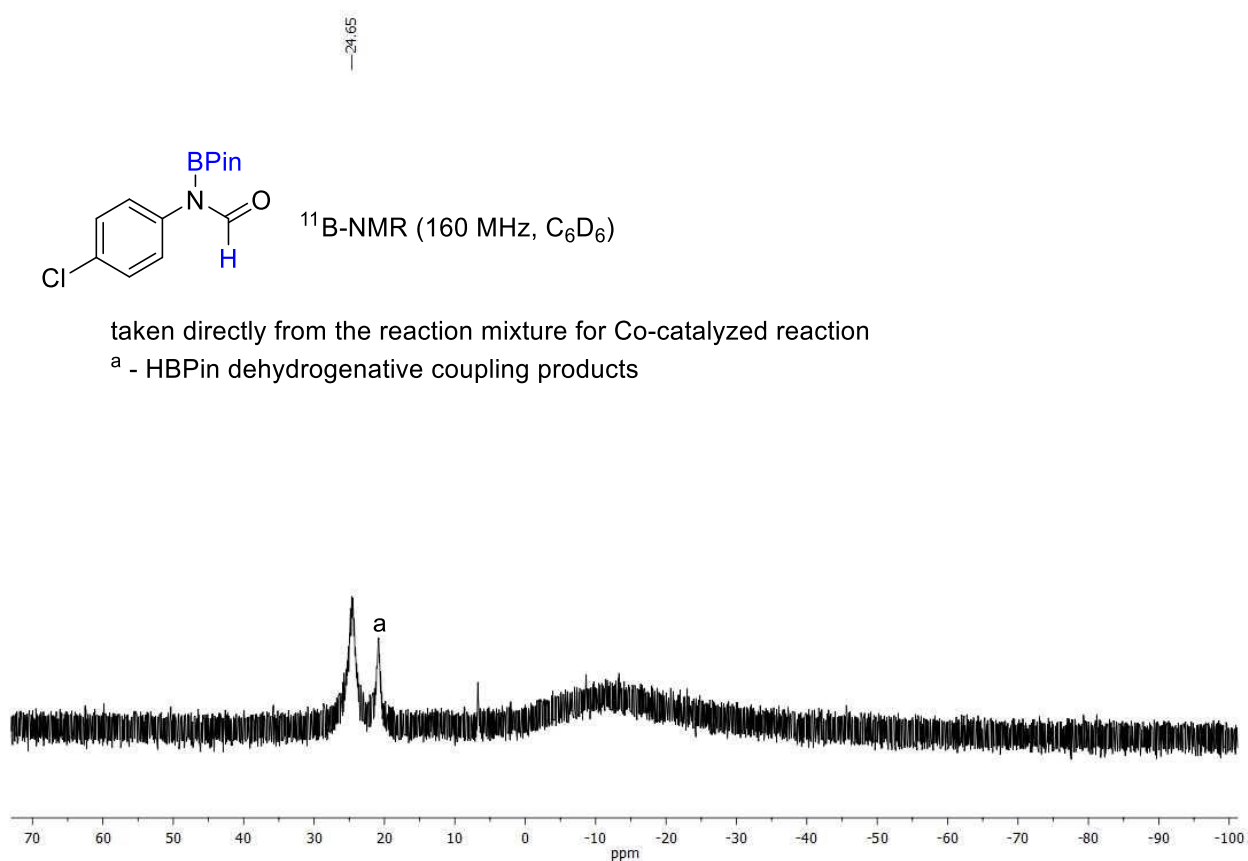

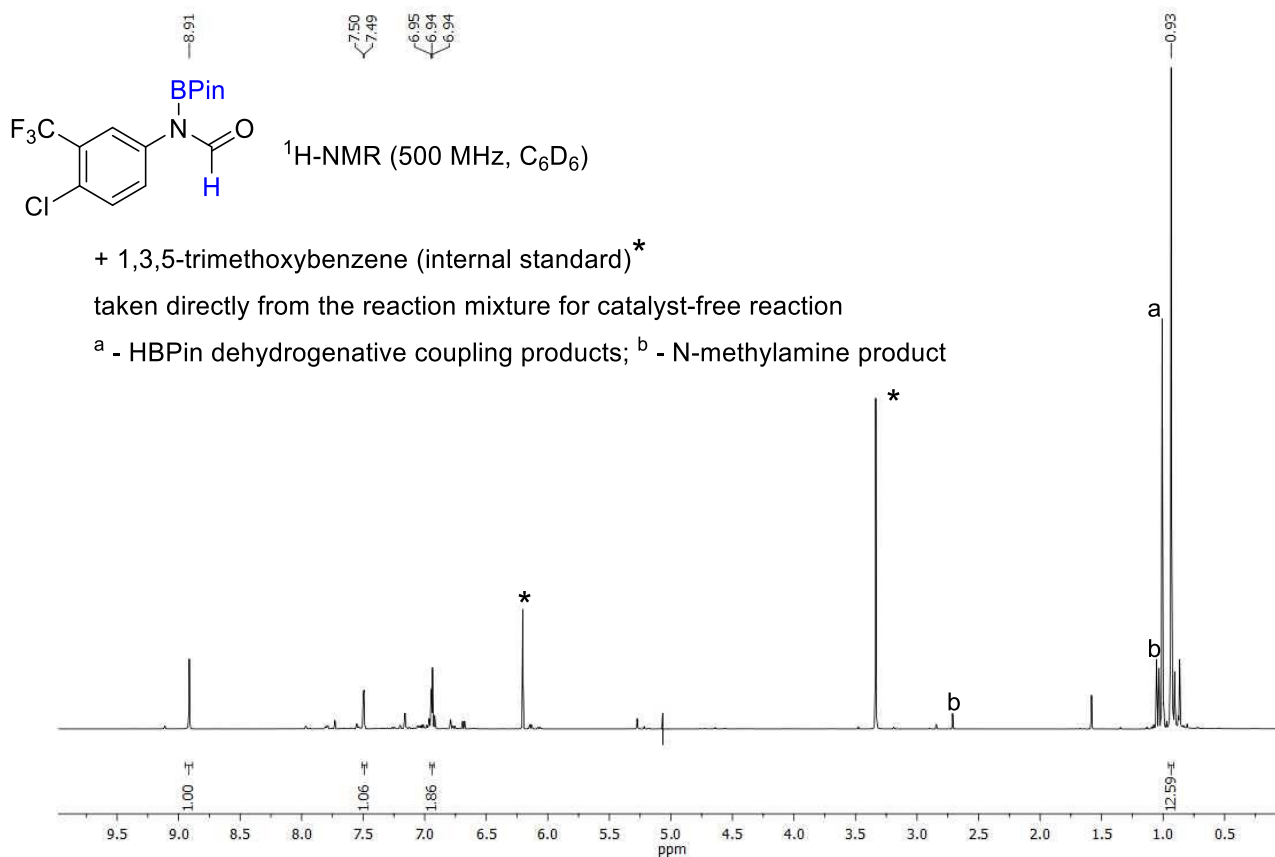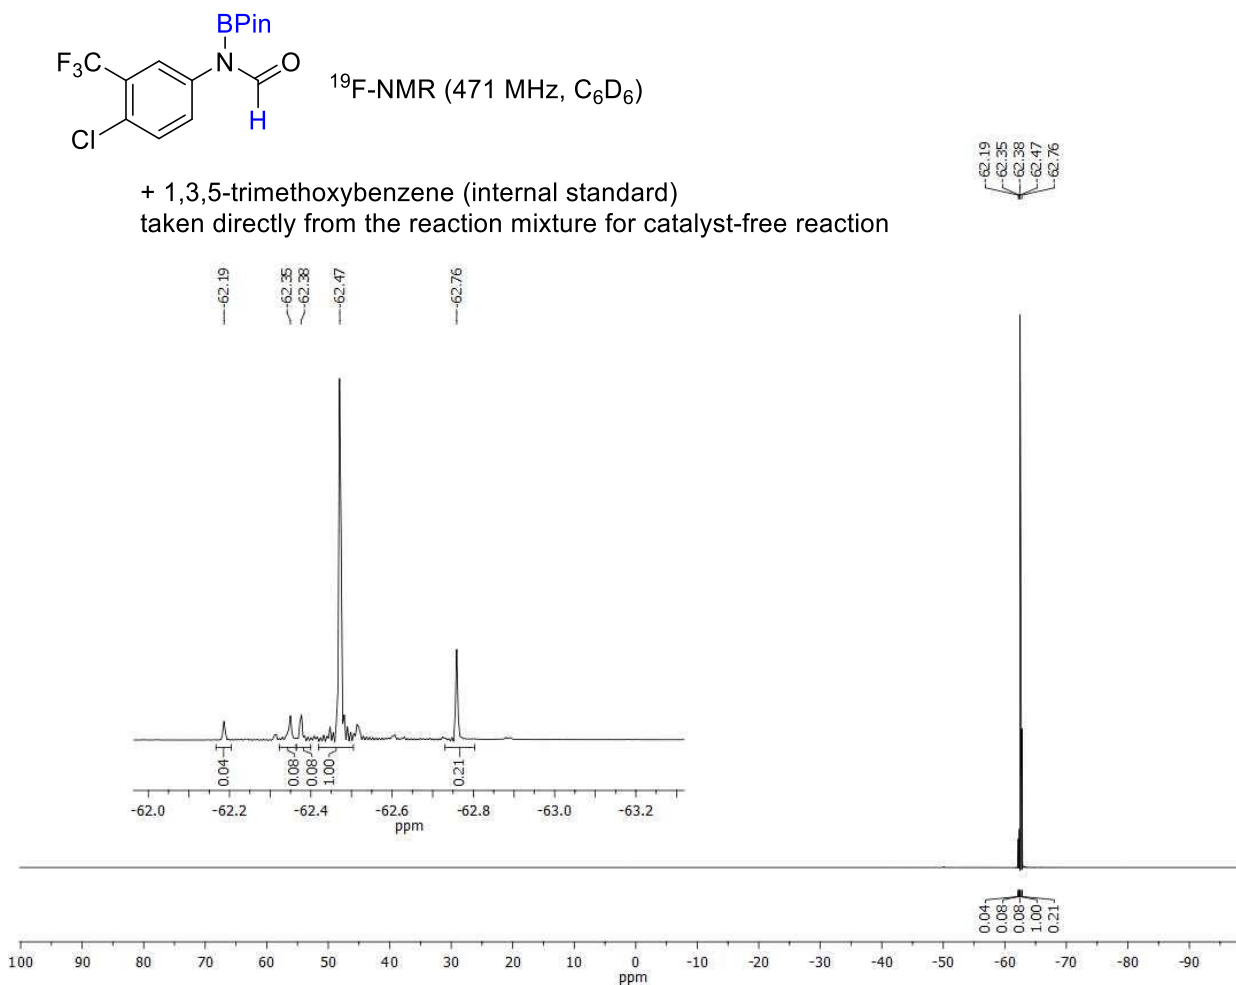

-24.41

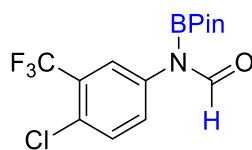

$^{11}\text{B}$ -NMR (160 MHz,  $\text{C}_6\text{D}_6$ )

taken directly from the reaction mixture for Co-catalyzed reaction

<sup>a</sup> - HBPIn dehydrogenative coupling products

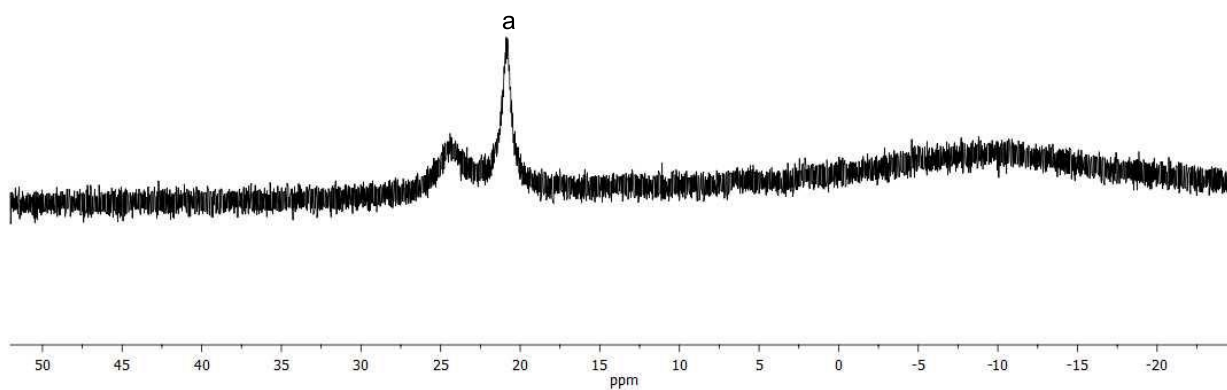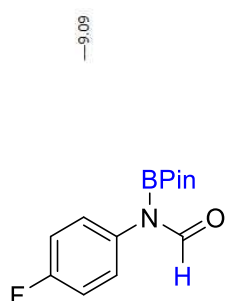

$^1\text{H}$ -NMR (500 MHz,  $\text{C}_6\text{D}_6$ )

taken directly from the reaction mixture for Co-catalyzed reaction

<sup>a</sup> - HBPIn dehydrogenative coupling products

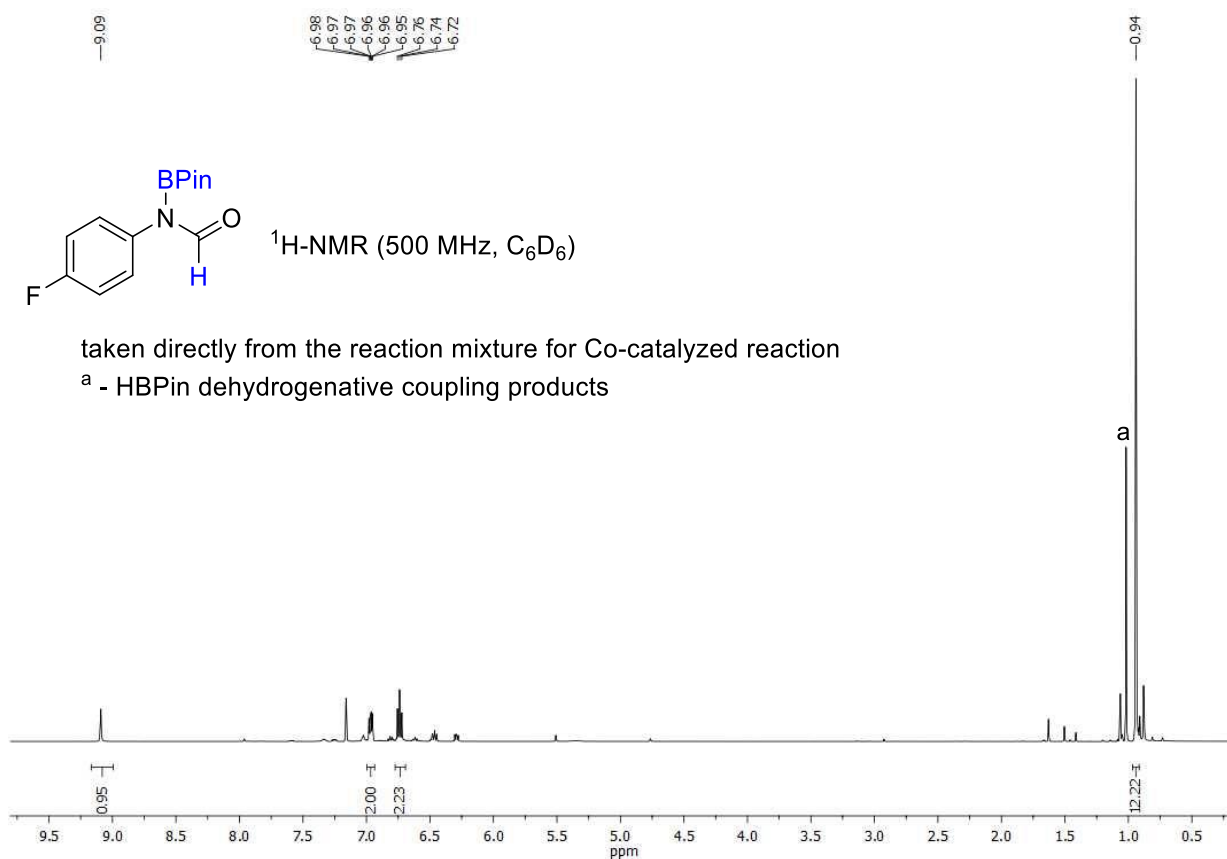

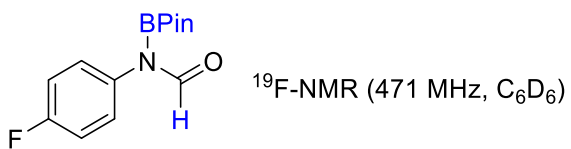

taken directly from the reaction mixture for Co-catalyzed reaction

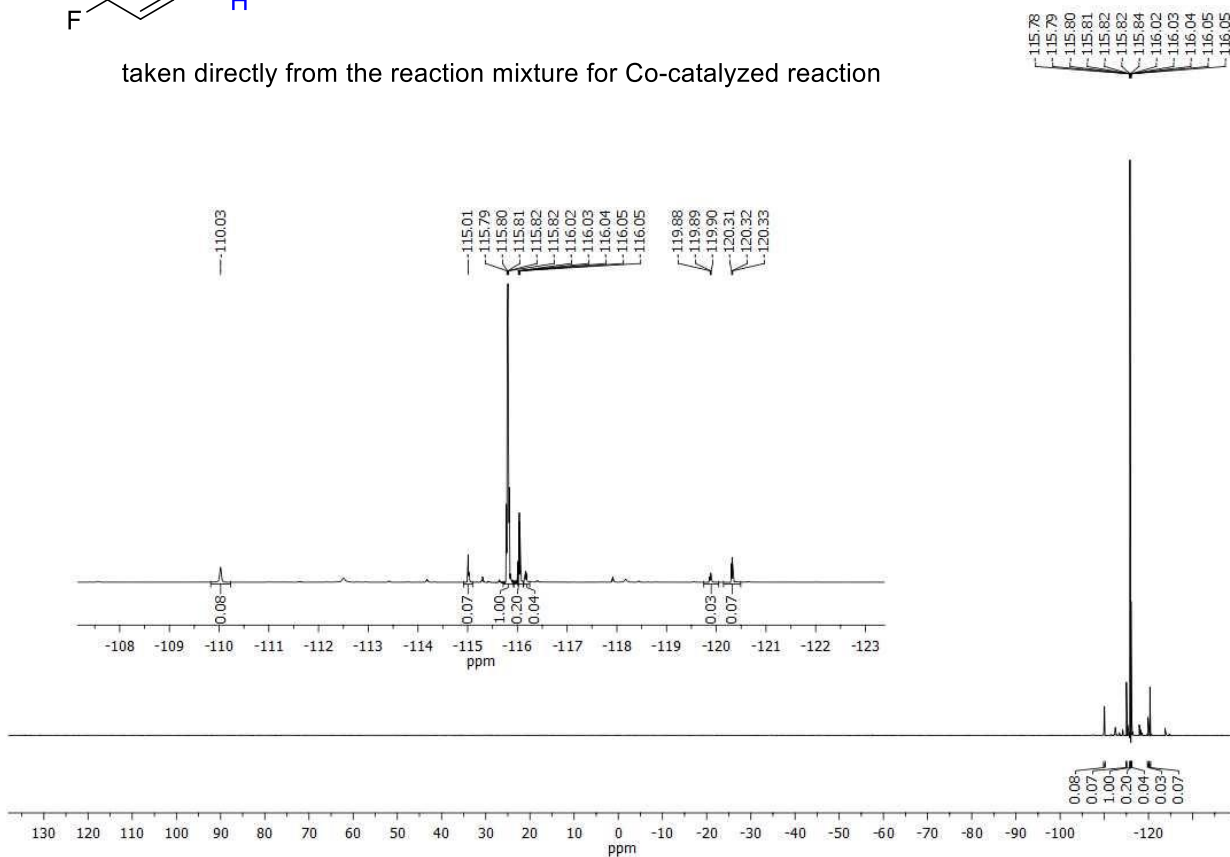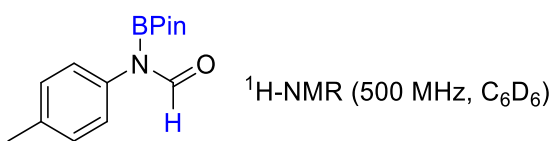

taken directly from the reaction mixture for Co-catalyzed reaction

a - starting isocyanate; b - HBPIn dehydrogenative coupling products

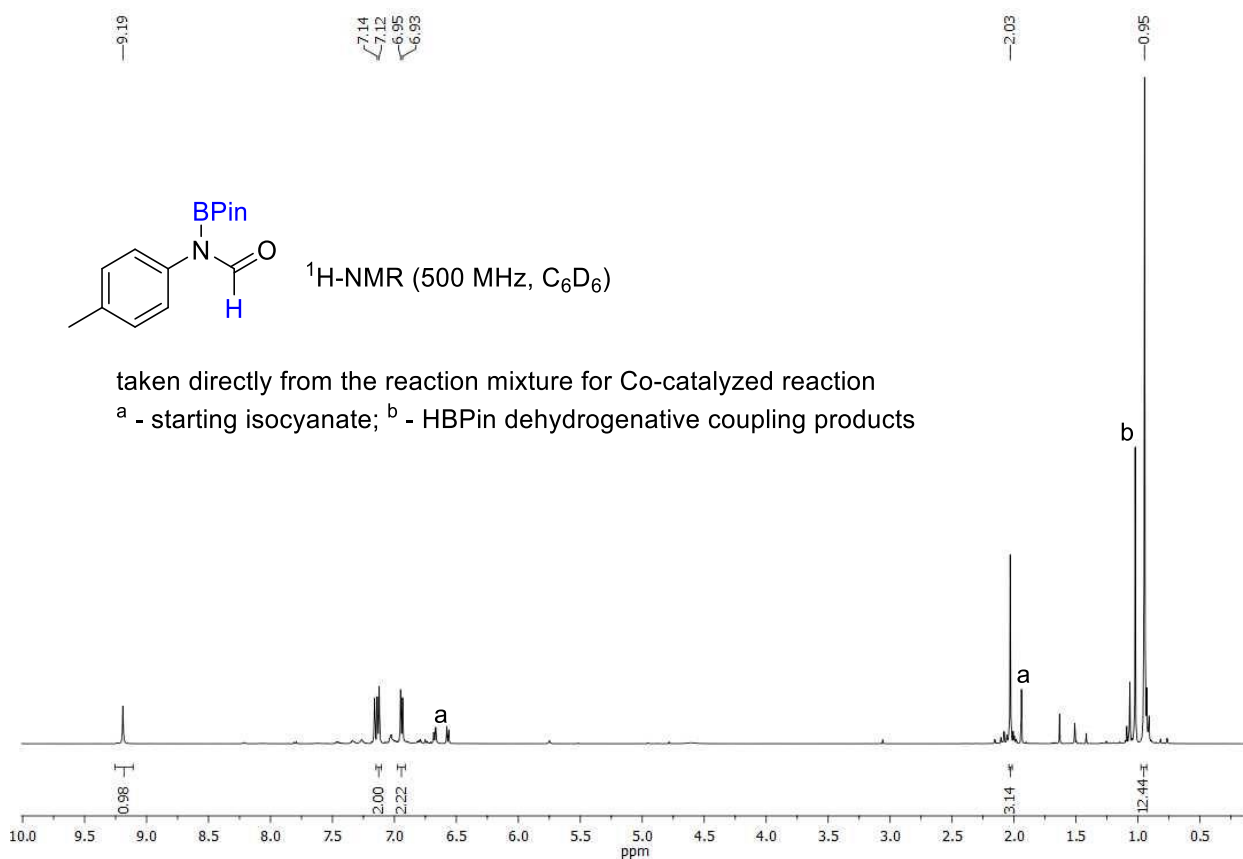

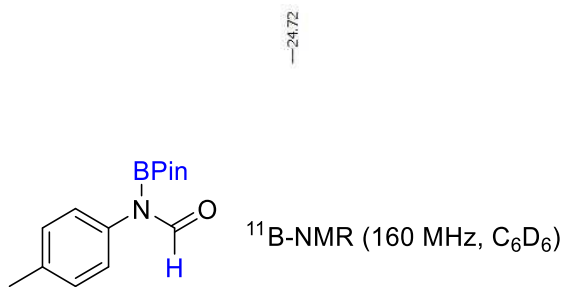

taken directly from the reaction mixture for Co-catalyzed reaction  
 a - HBPin dehydrogenative coupling products

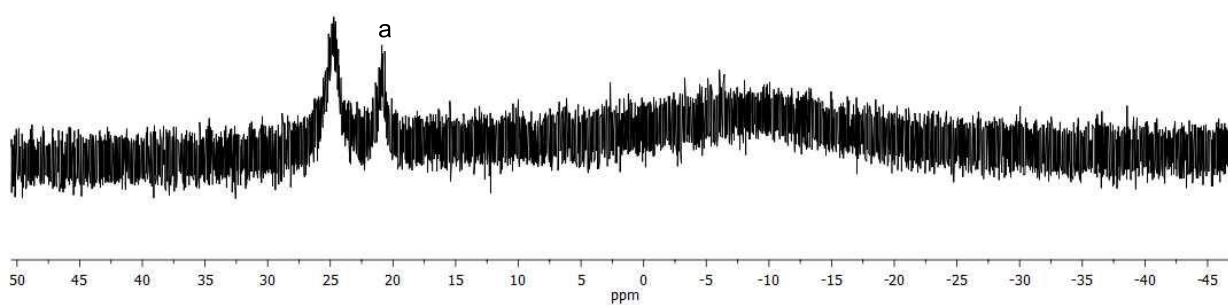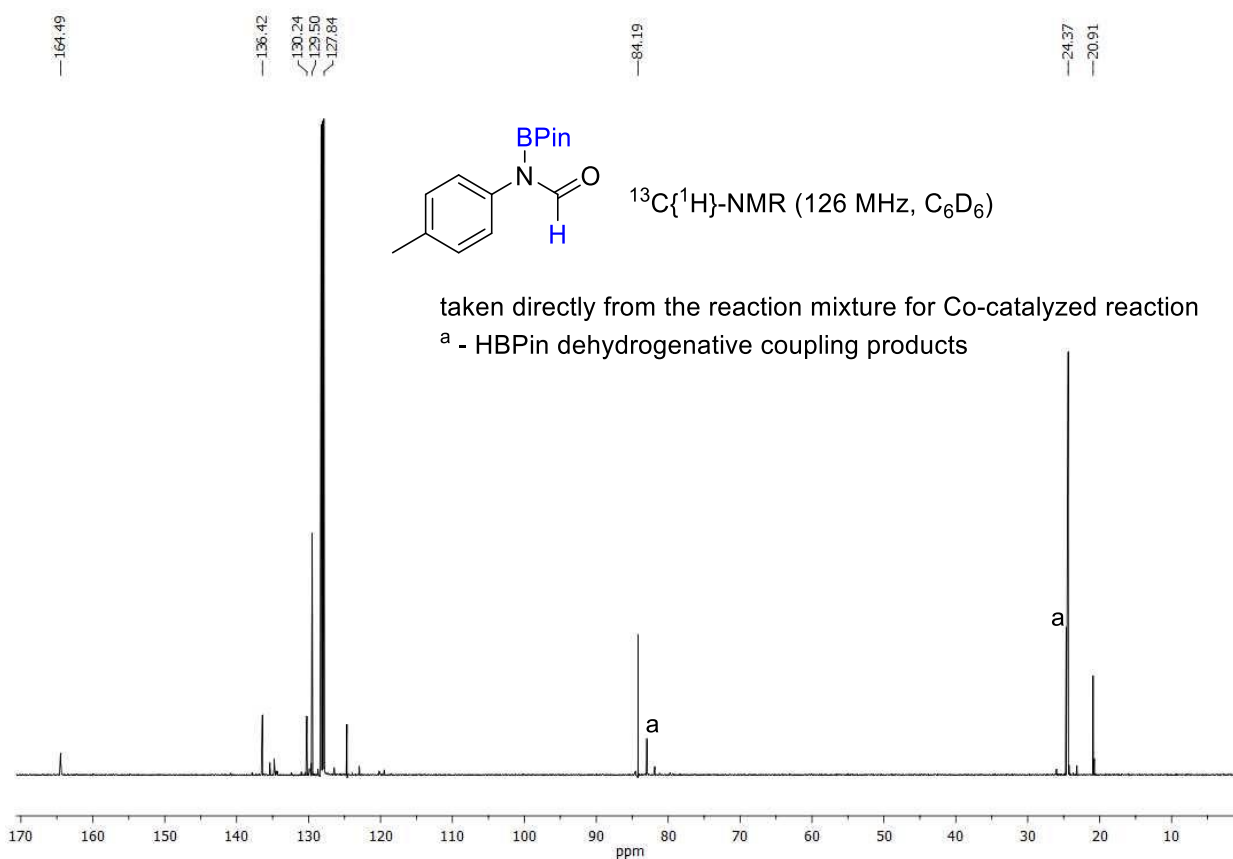

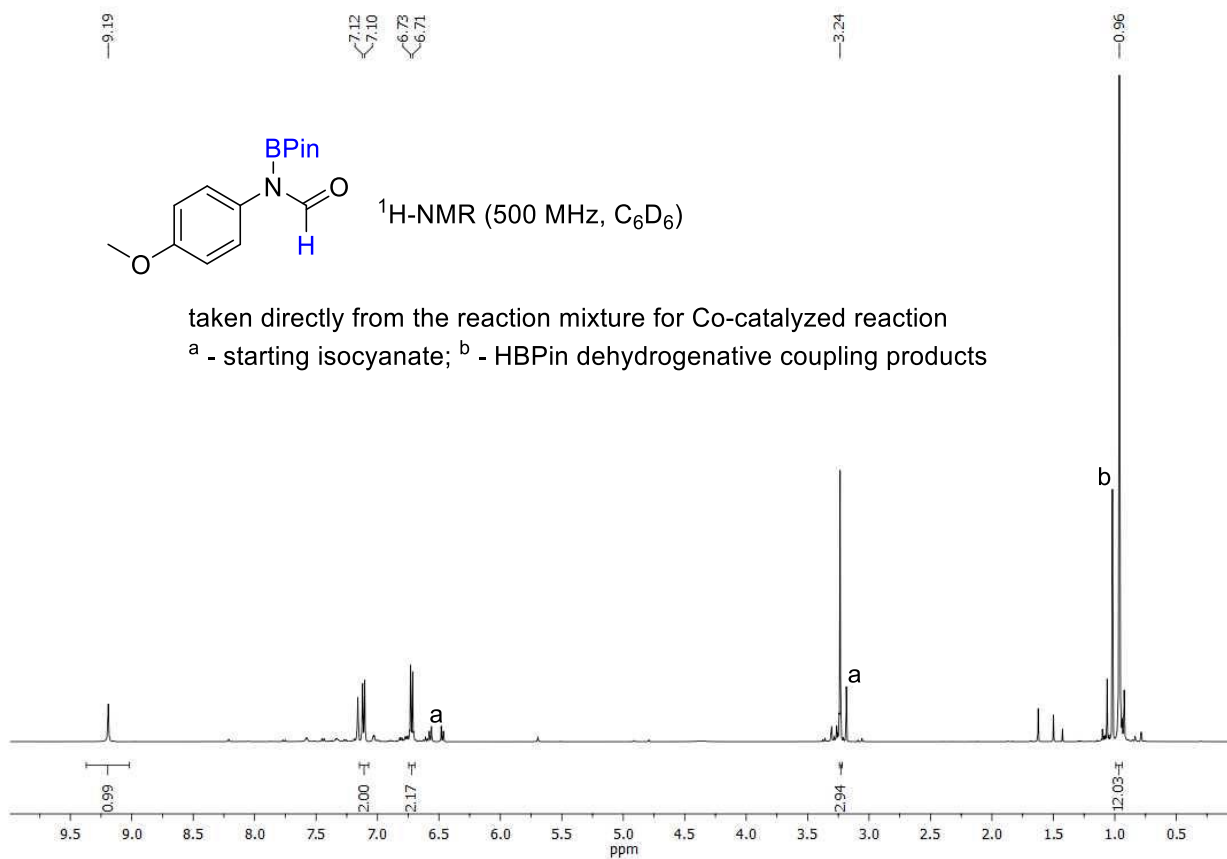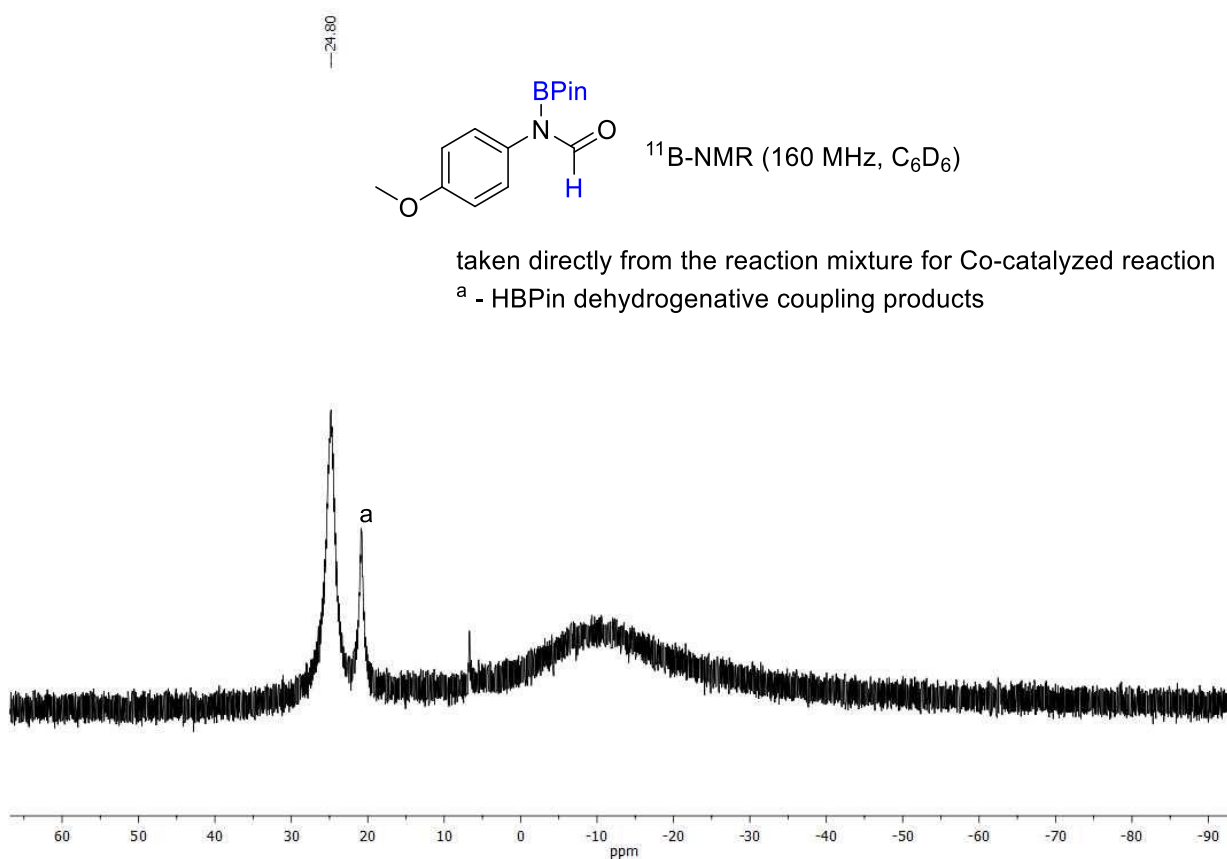

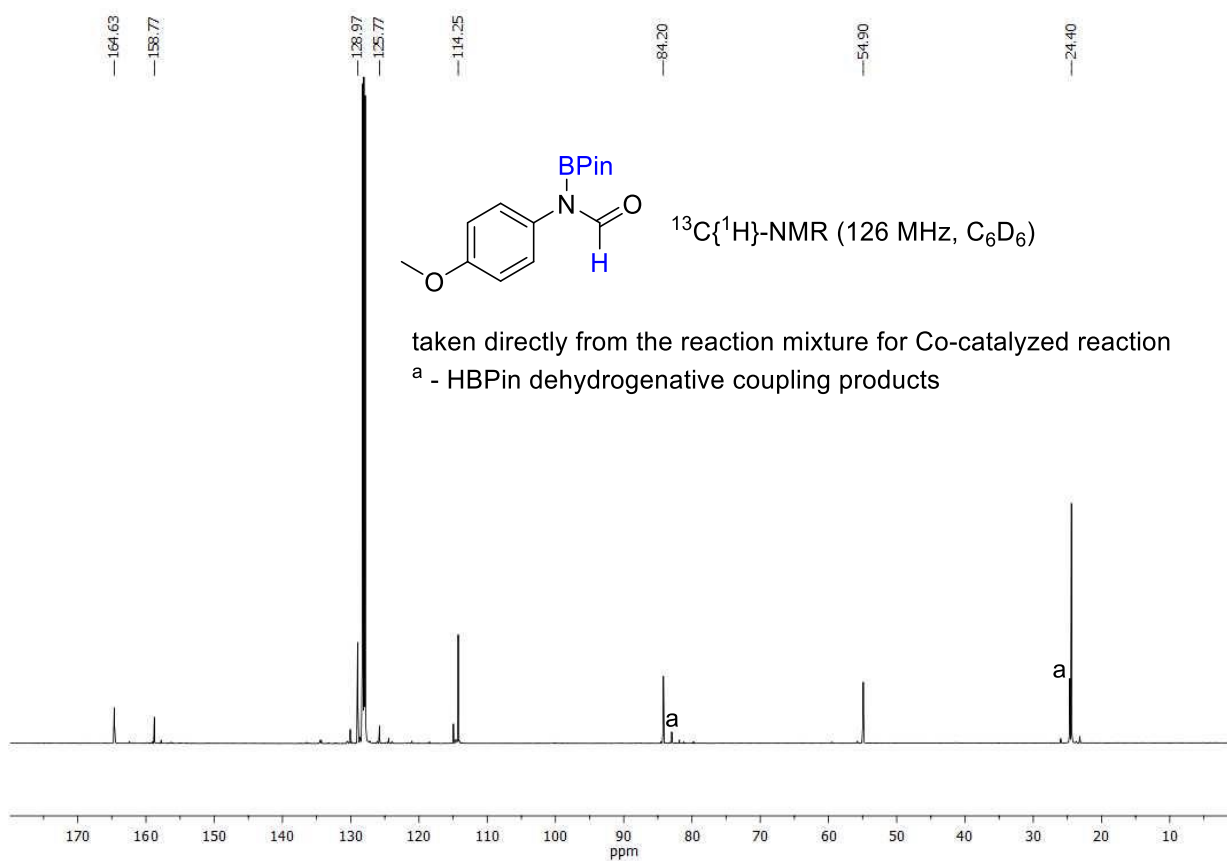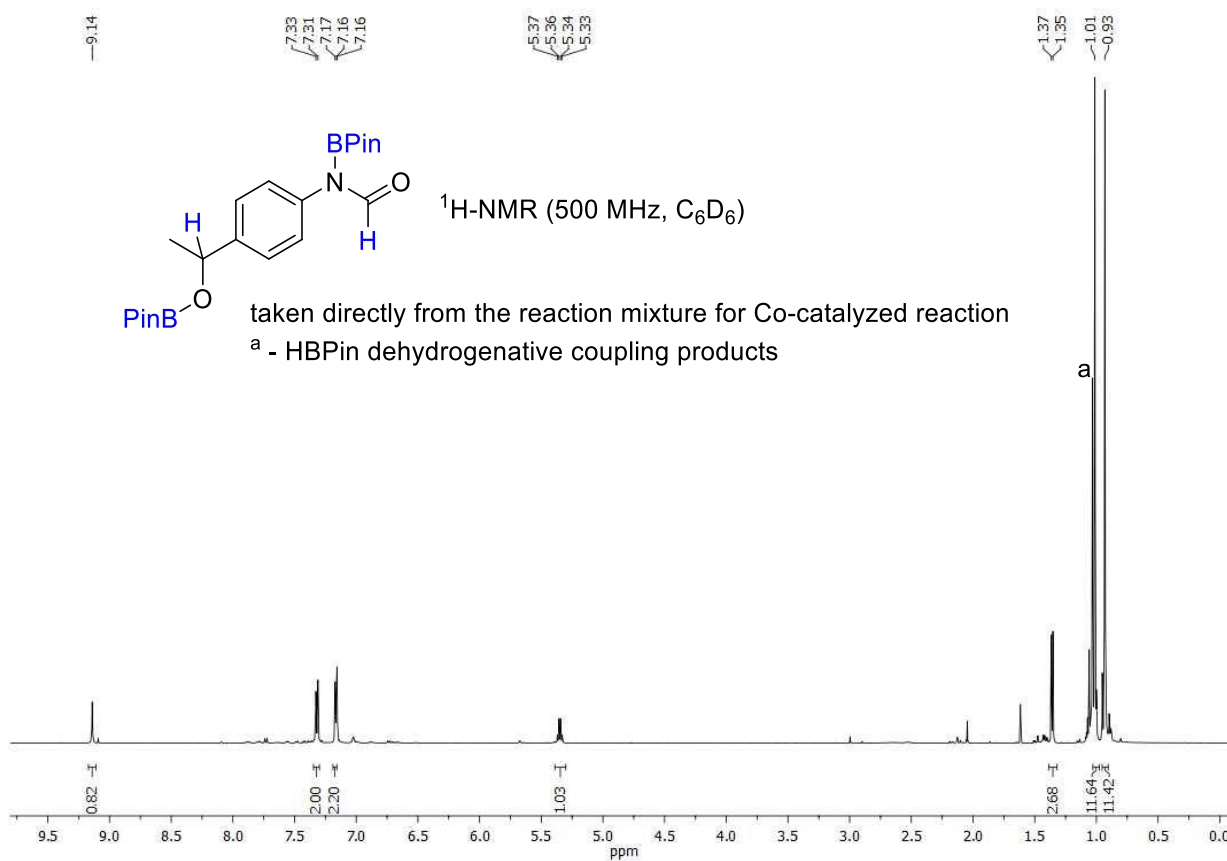

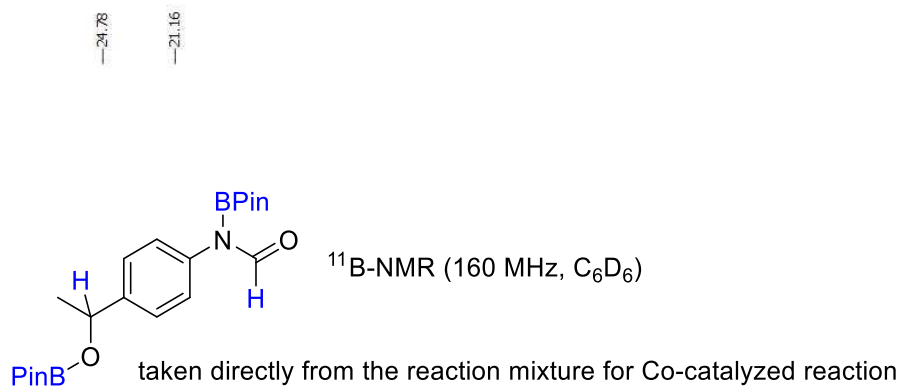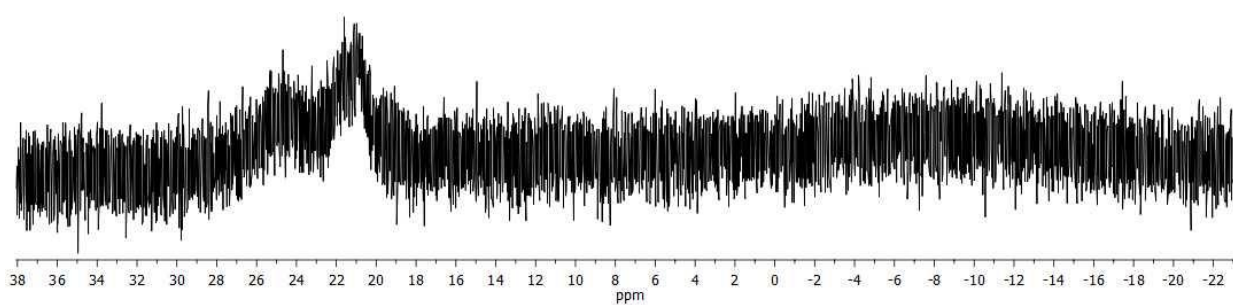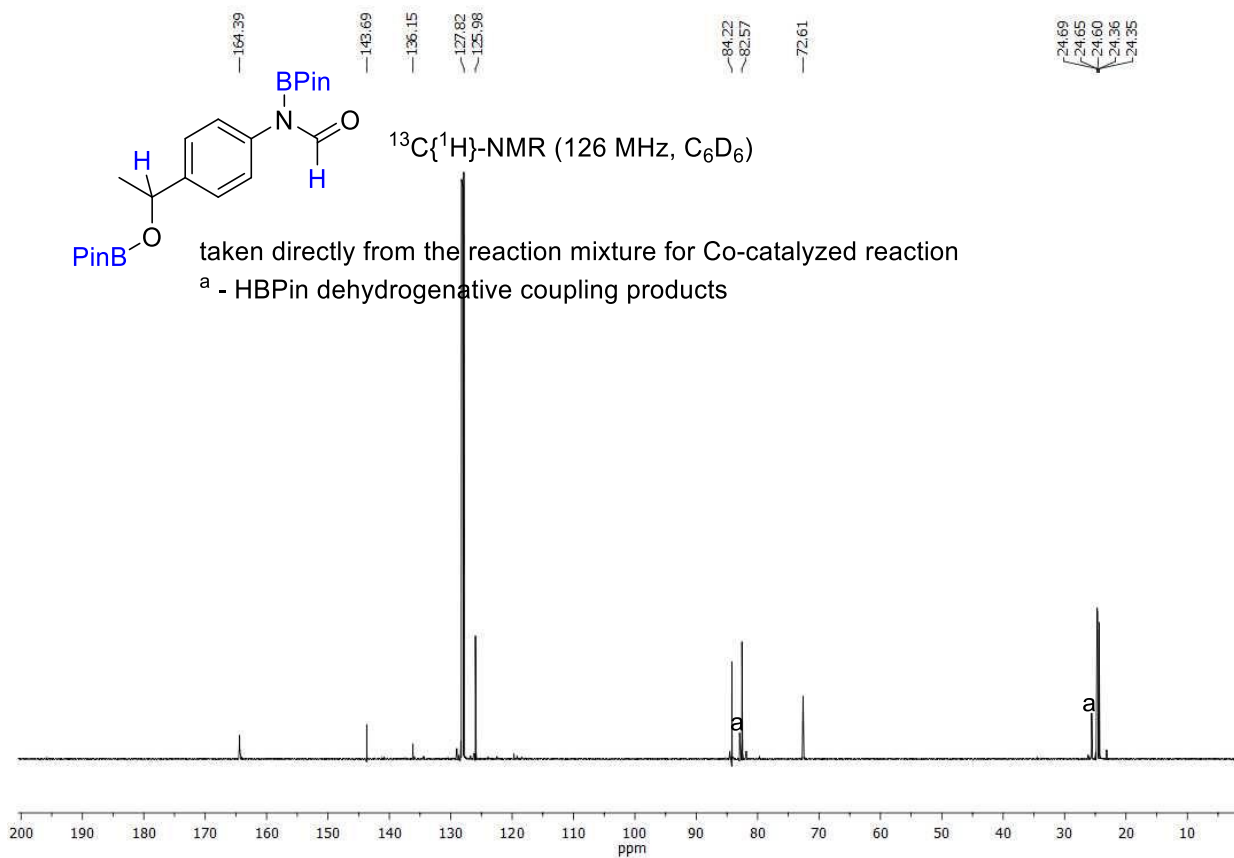



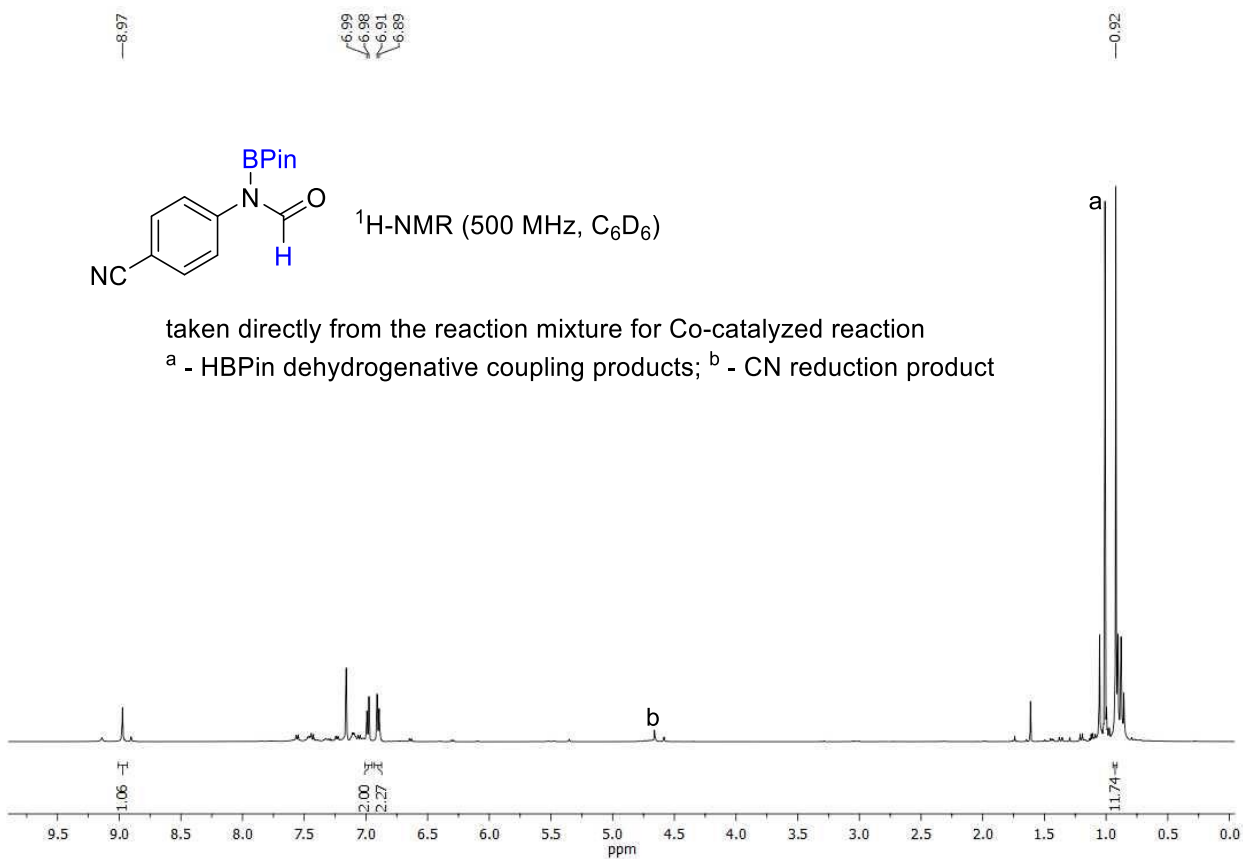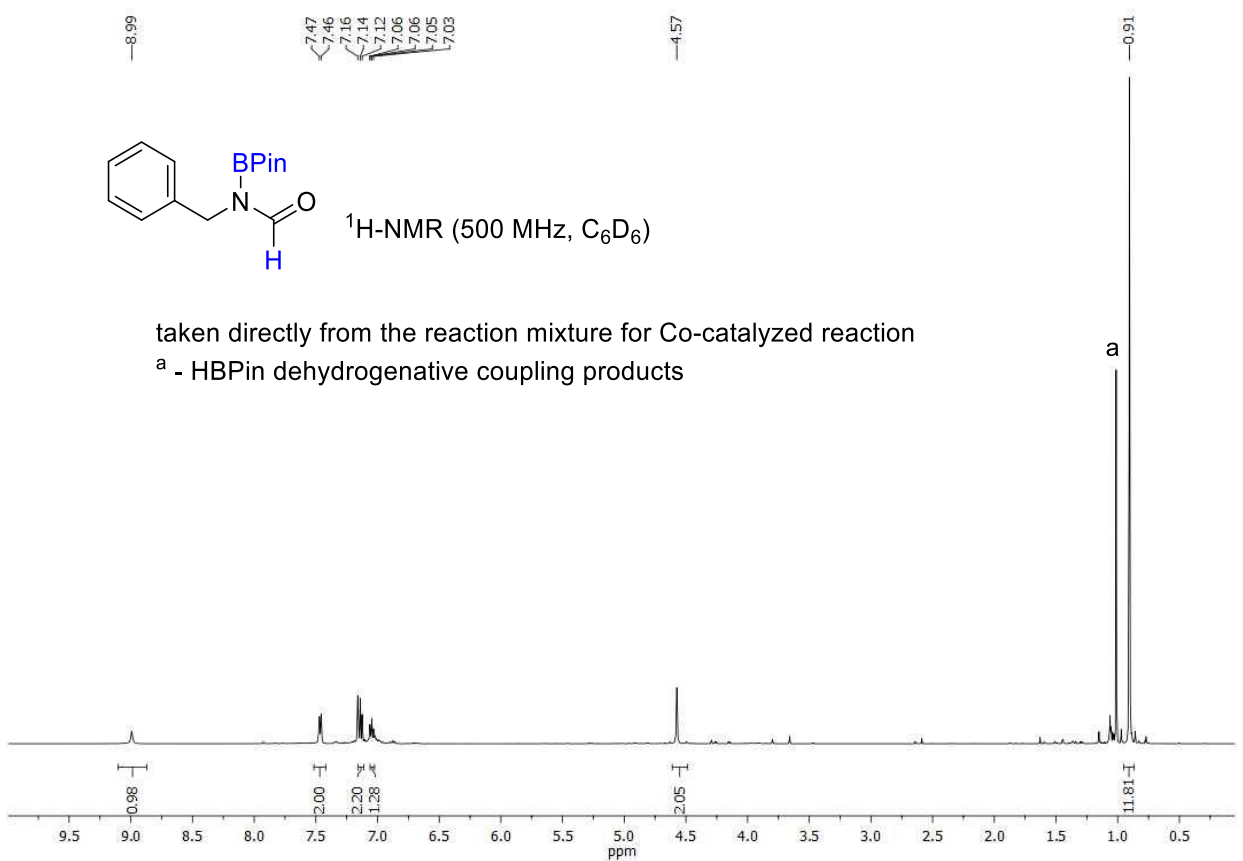

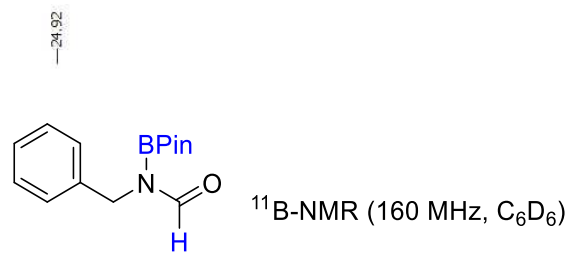

taken directly from the reaction mixture for Co-catalyzed reaction  
 a - HBPin dehydrogenative coupling products

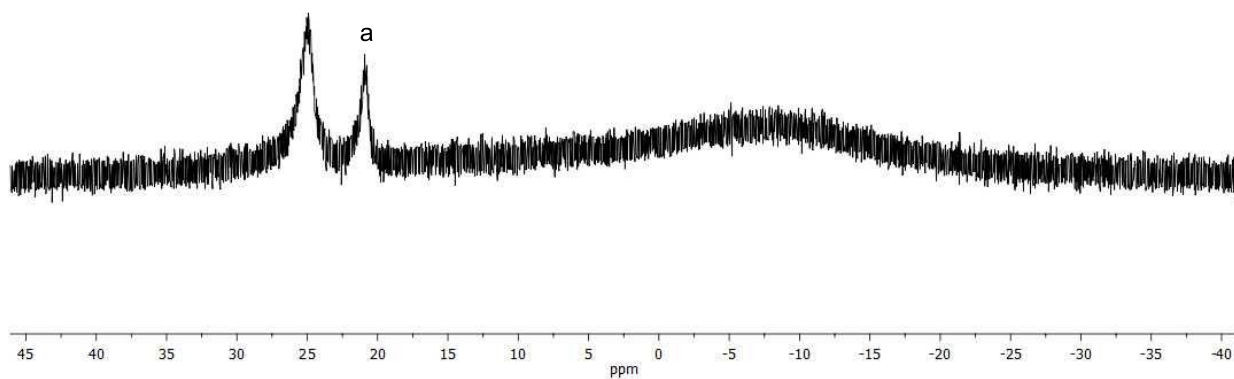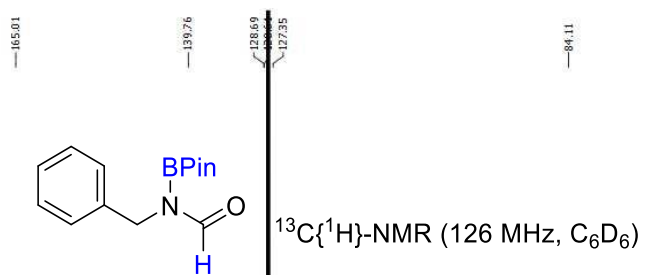

taken directly from the reaction mixture for Co-catalyzed reaction  
 a - HBPin dehydrogenative coupling products

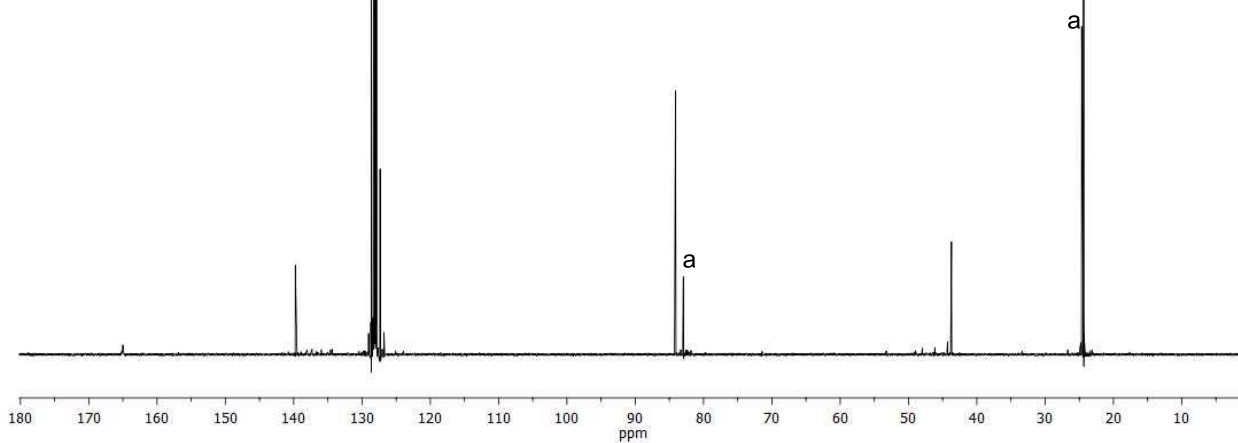

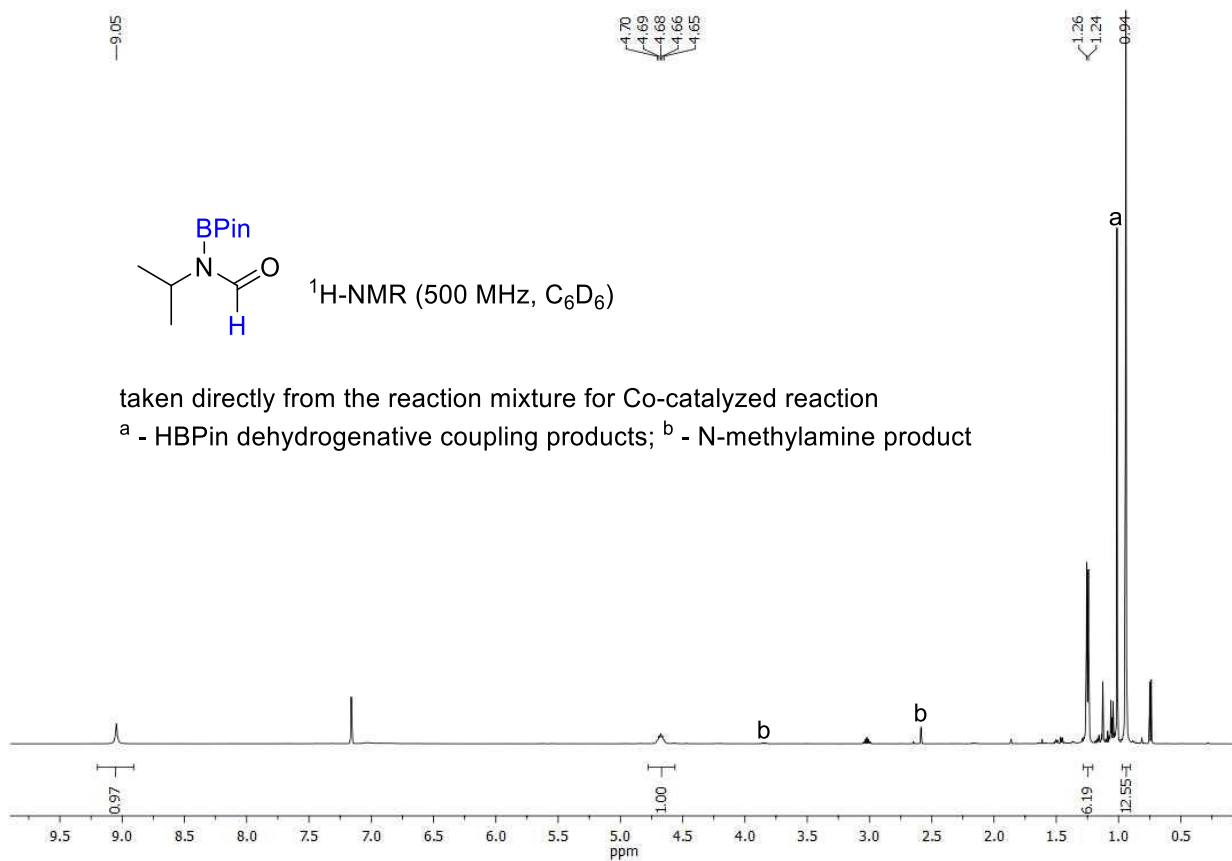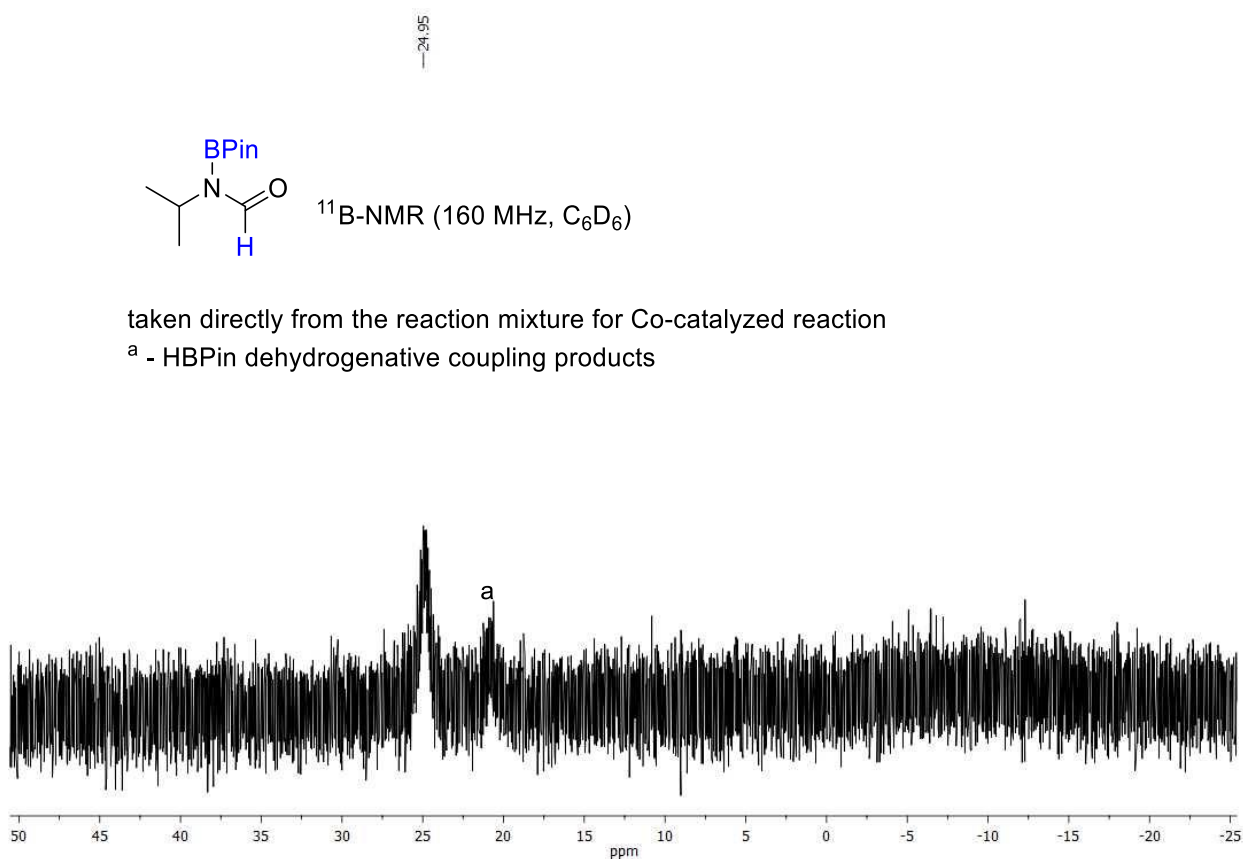

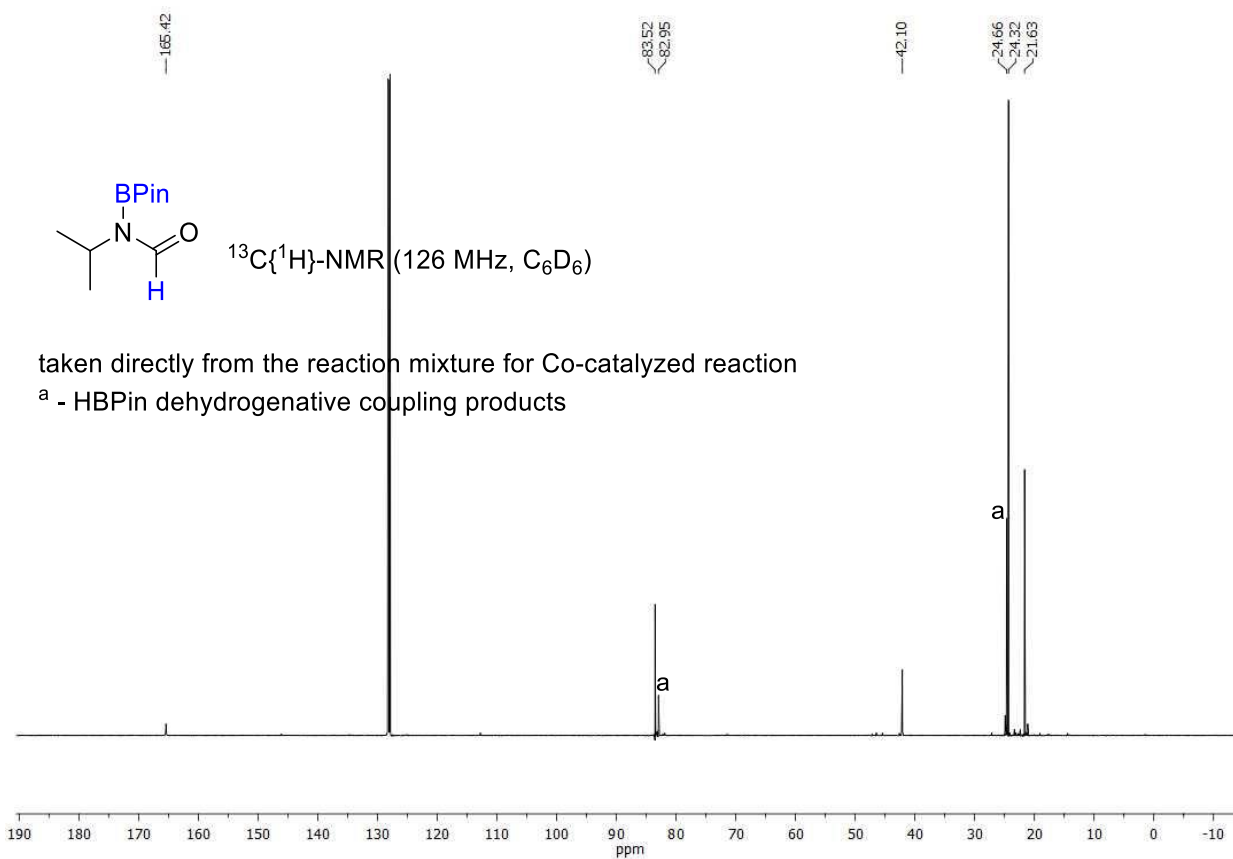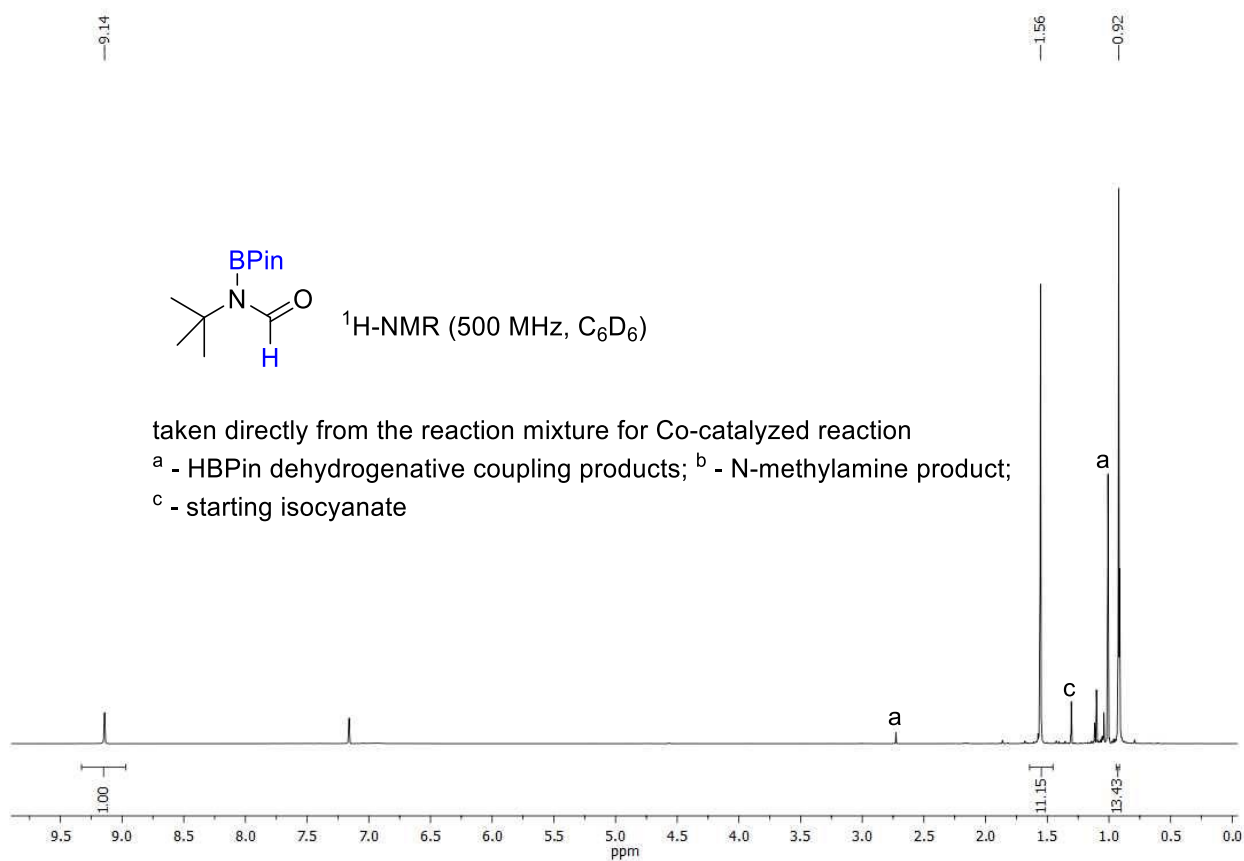

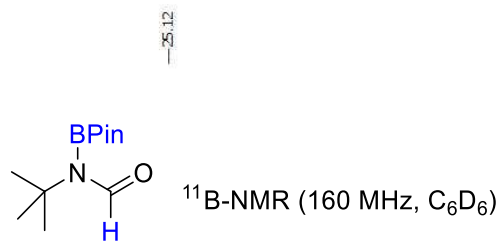

taken directly from the reaction mixture for Co-catalyzed reaction

**a** - HBPin dehydrogenative coupling products

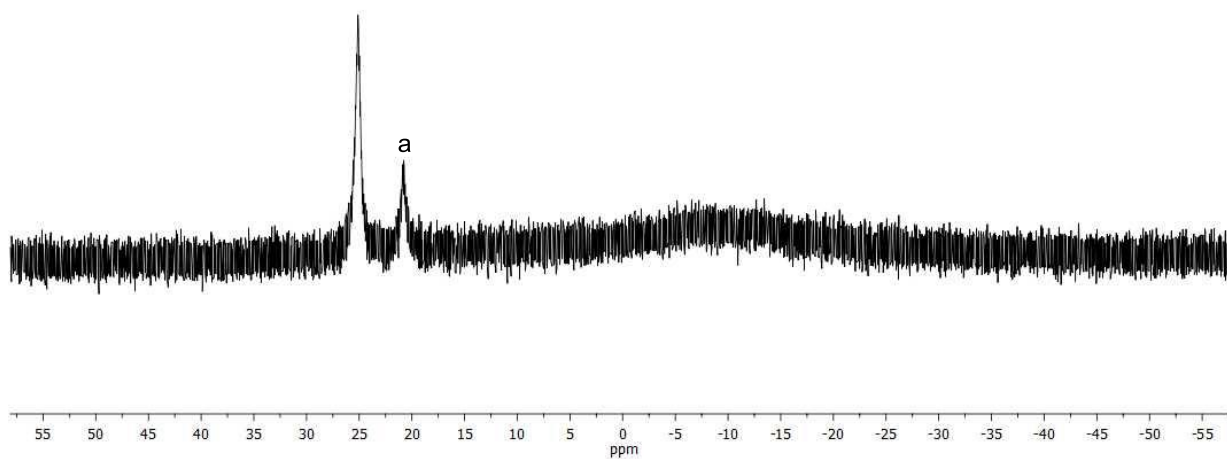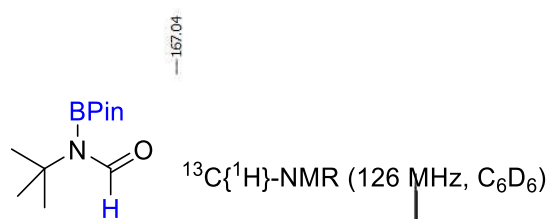

taken directly from the reaction mixture for Co-catalyzed reaction

**a** - HBPin dehydrogenative coupling products; **b** - starting isocyanate

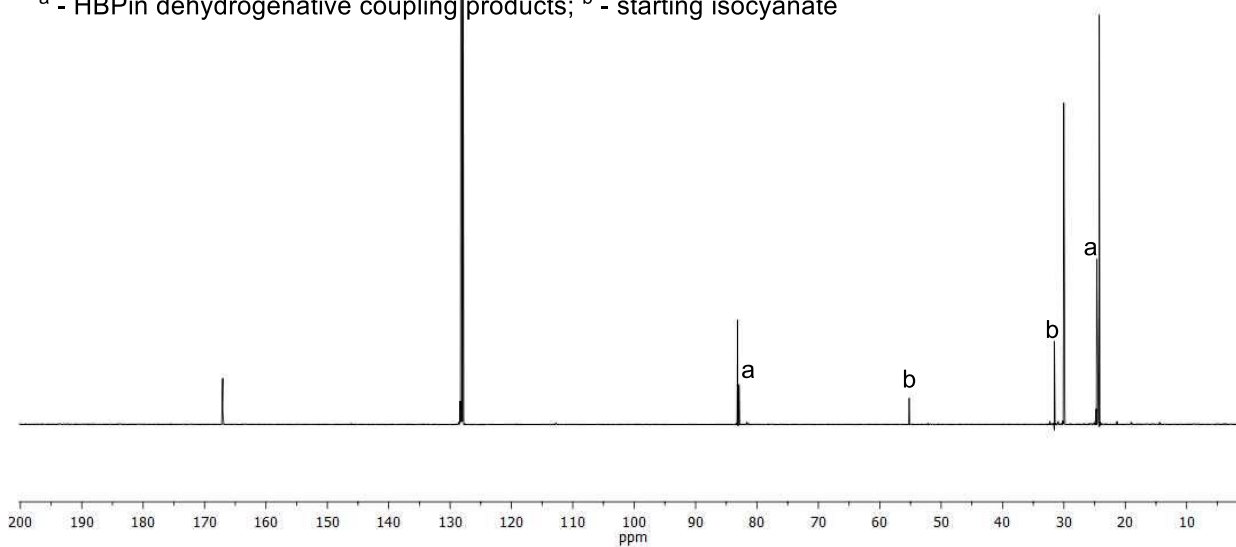

NMR spectra for borylated *N*-phenylformamide, *N*-(*p*-tolyl)formamide, *N*-(4-methoxyphenyl)formamide, *N*-(4-cyanophenyl)formamide, *N*-(4-fluorophenyl)formamide, and *N*-(4-chlorophenyl)formamide are consistent with those previously reported in the literature.<sup>13</sup>

## 5. NMR spectra for isolated formamides

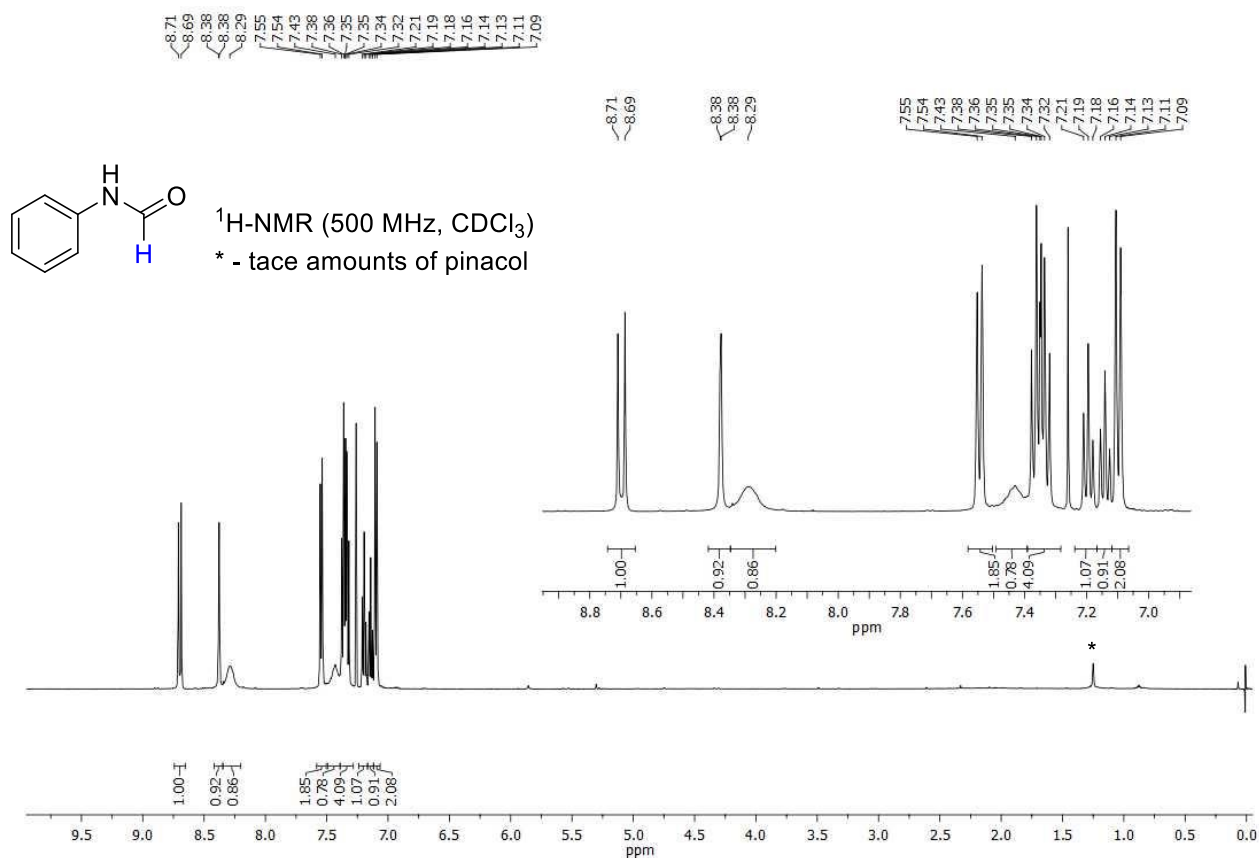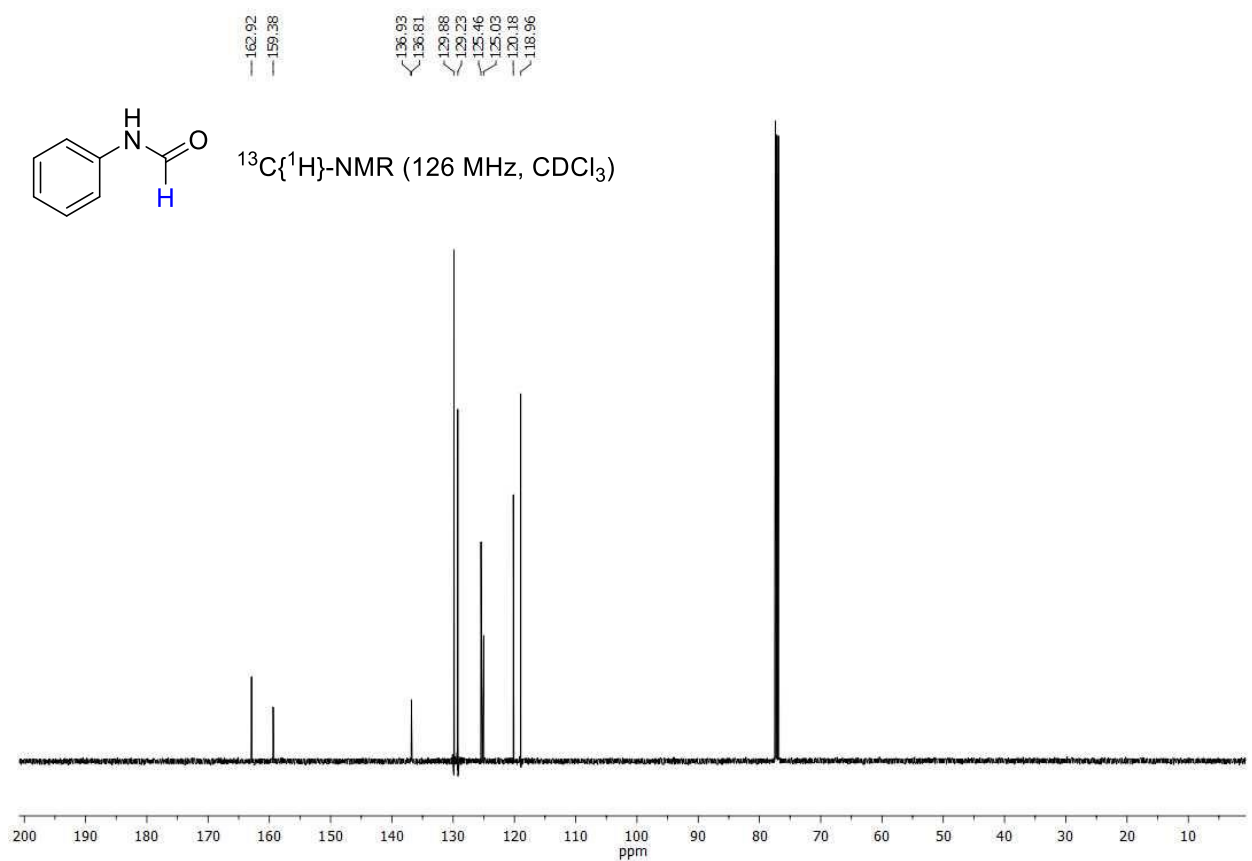

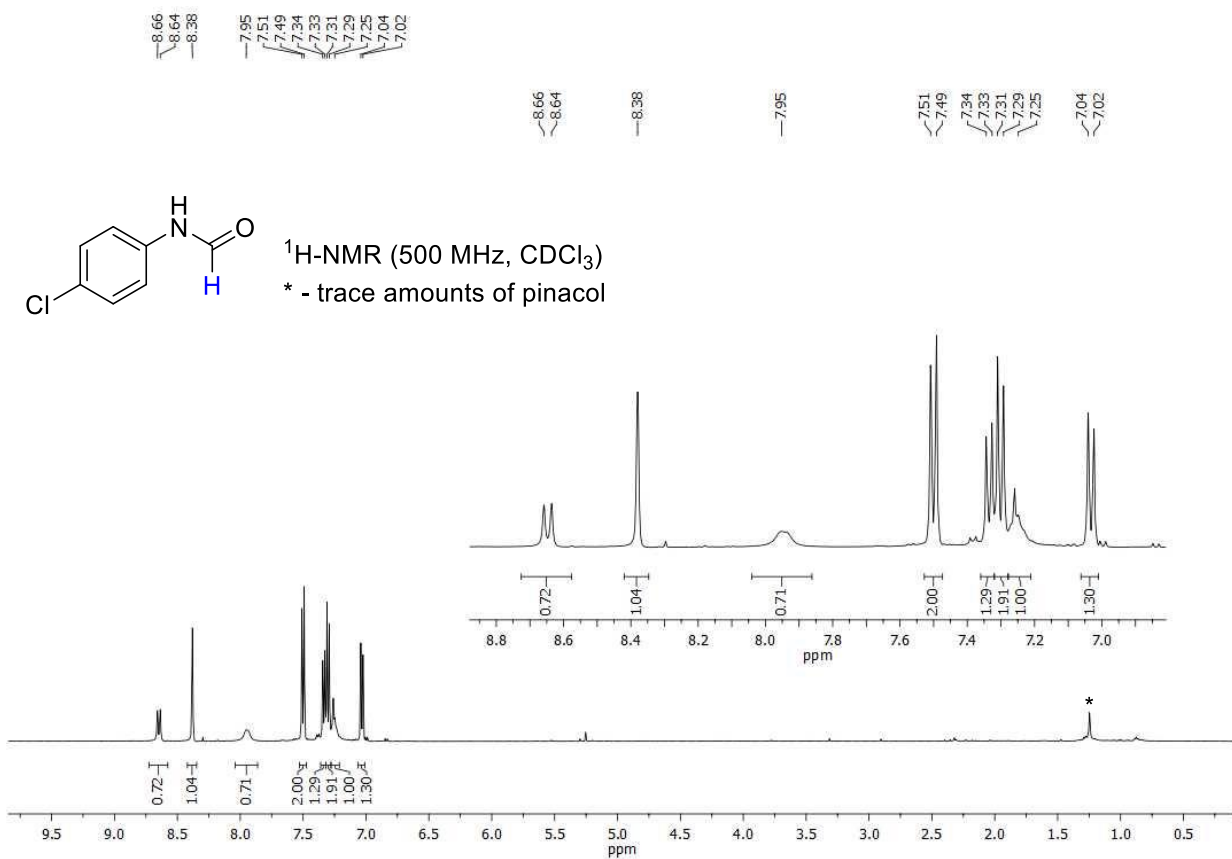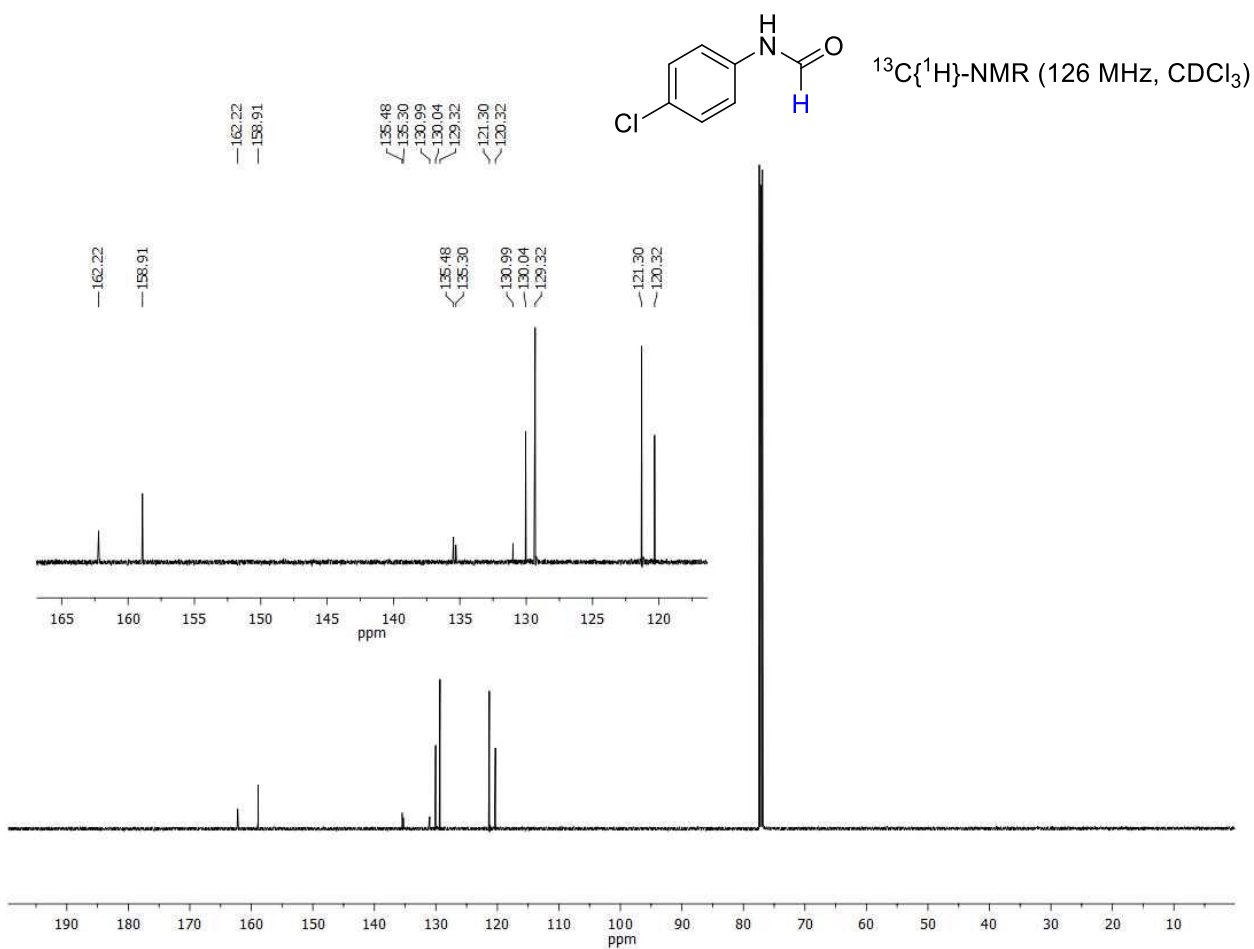



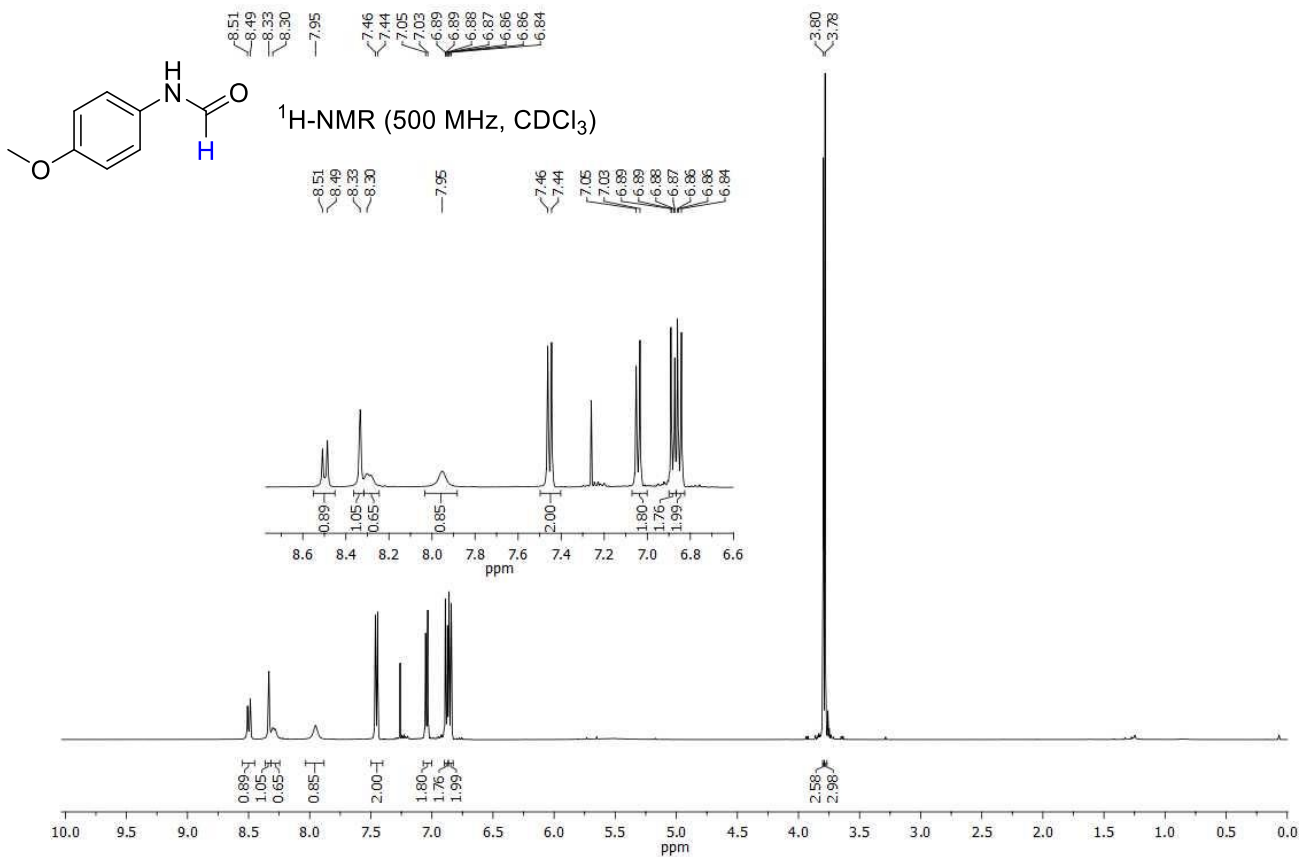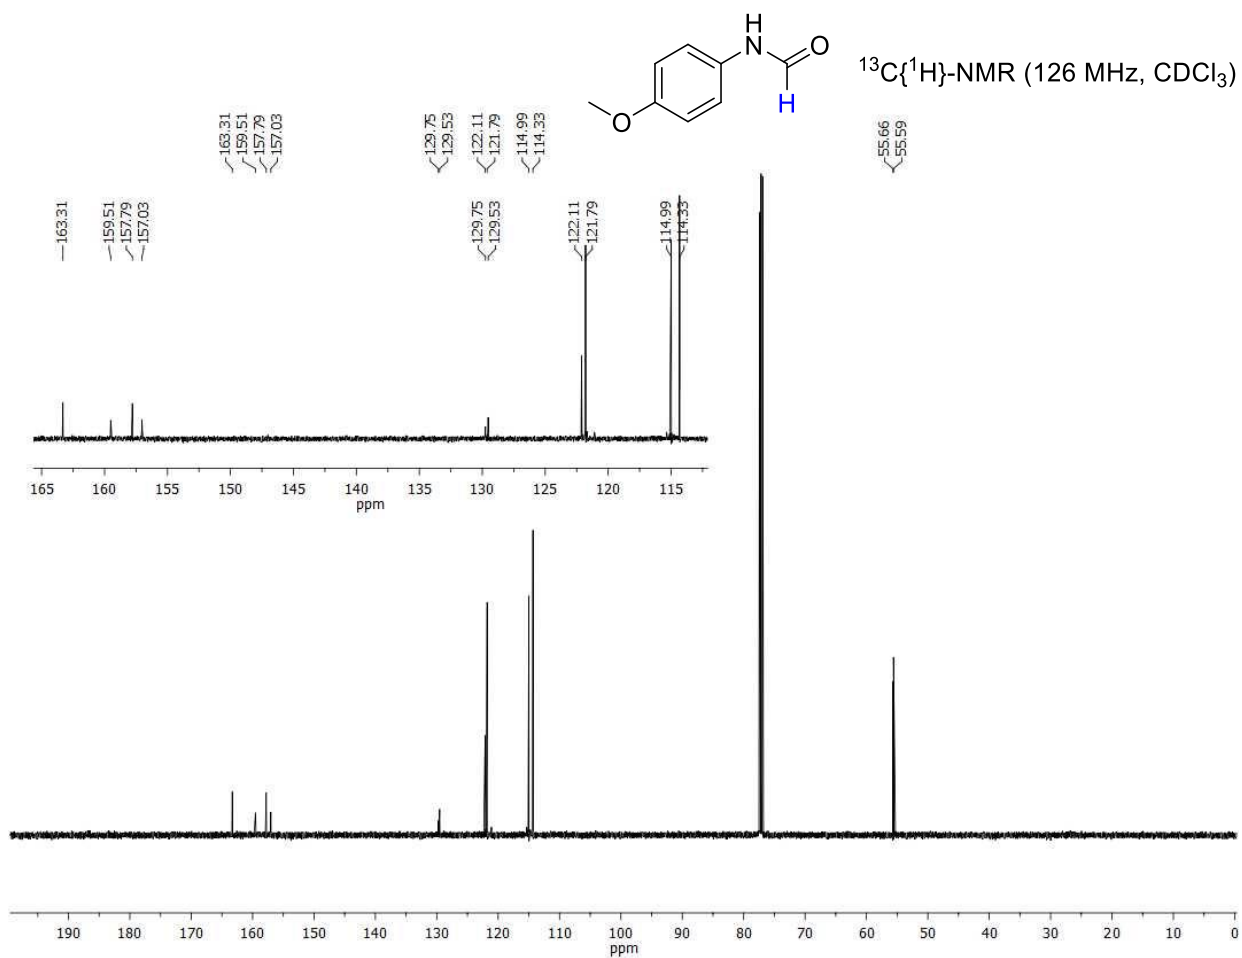

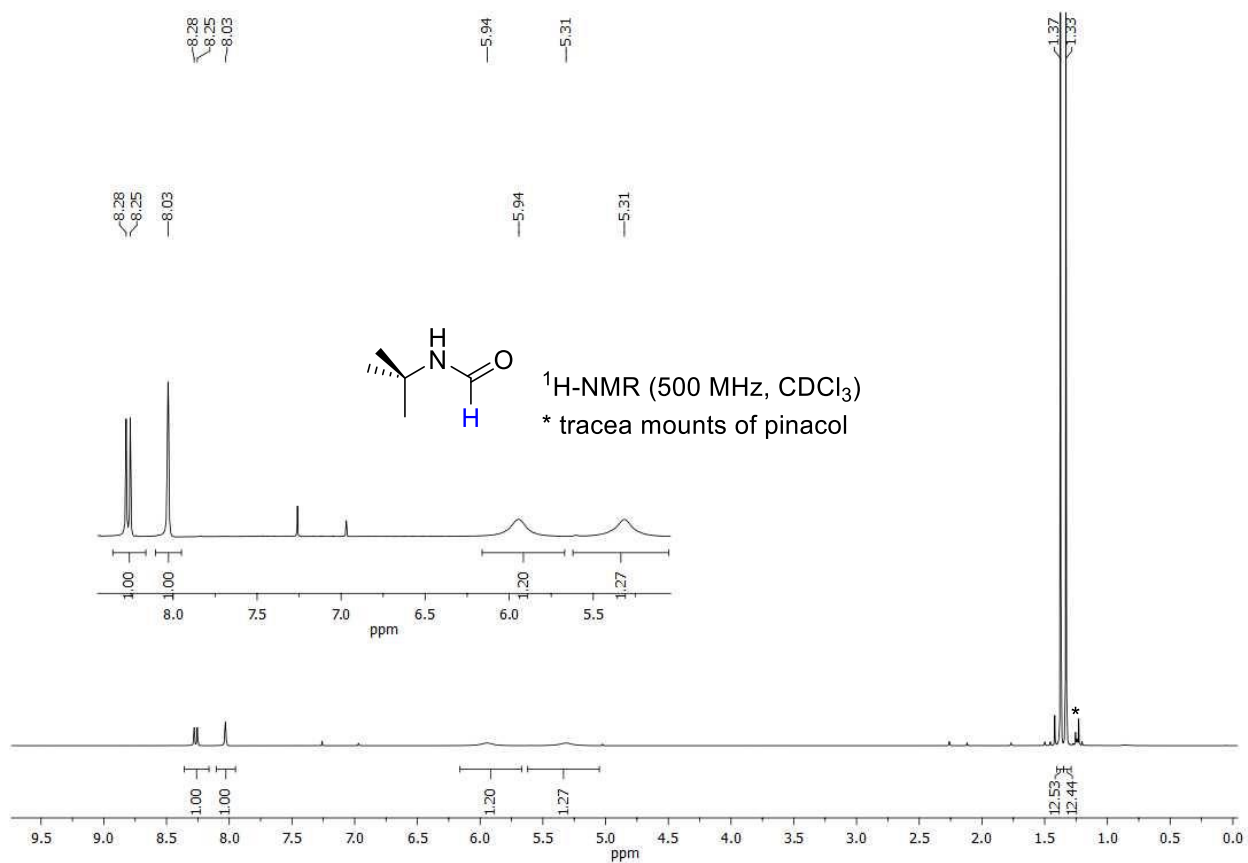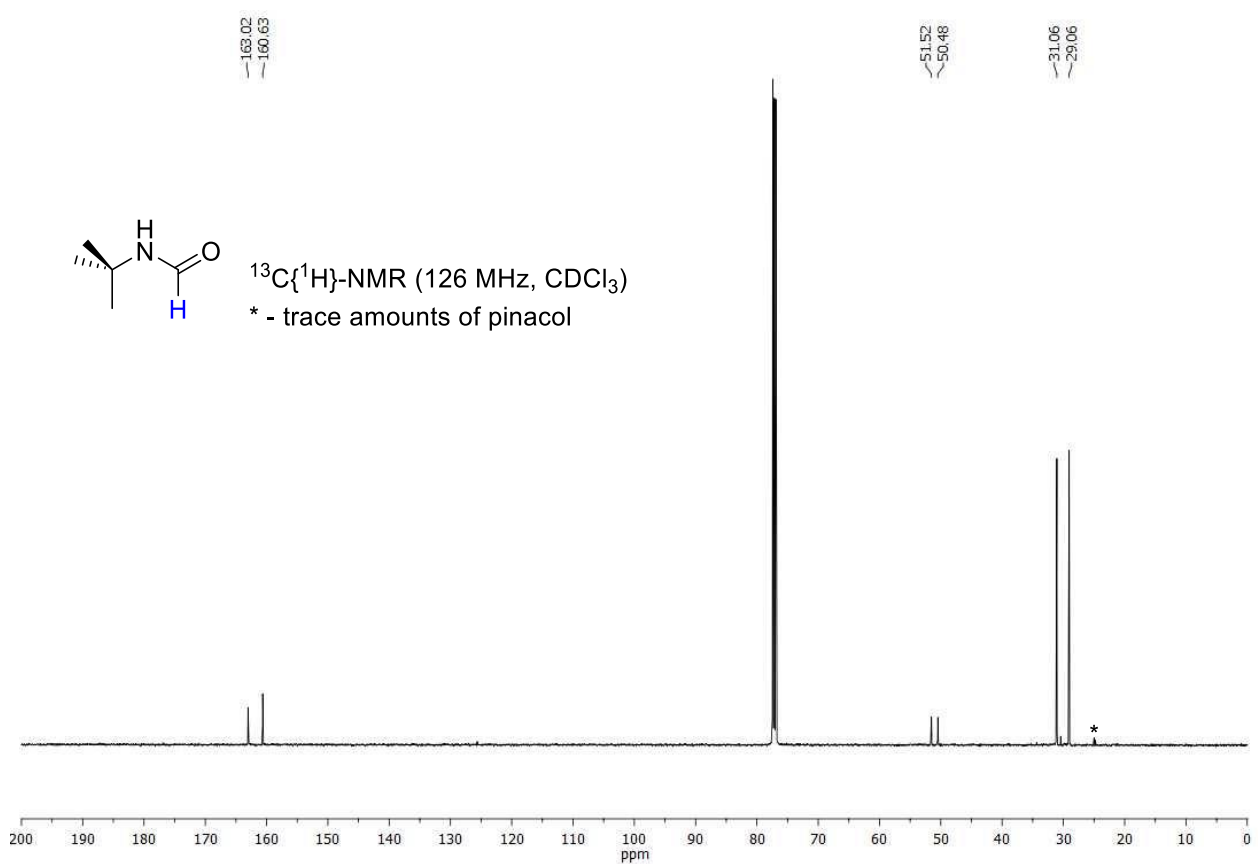

## 6. NMR spectra for borylated N-methylamines (taken directly from reaction mixtures)

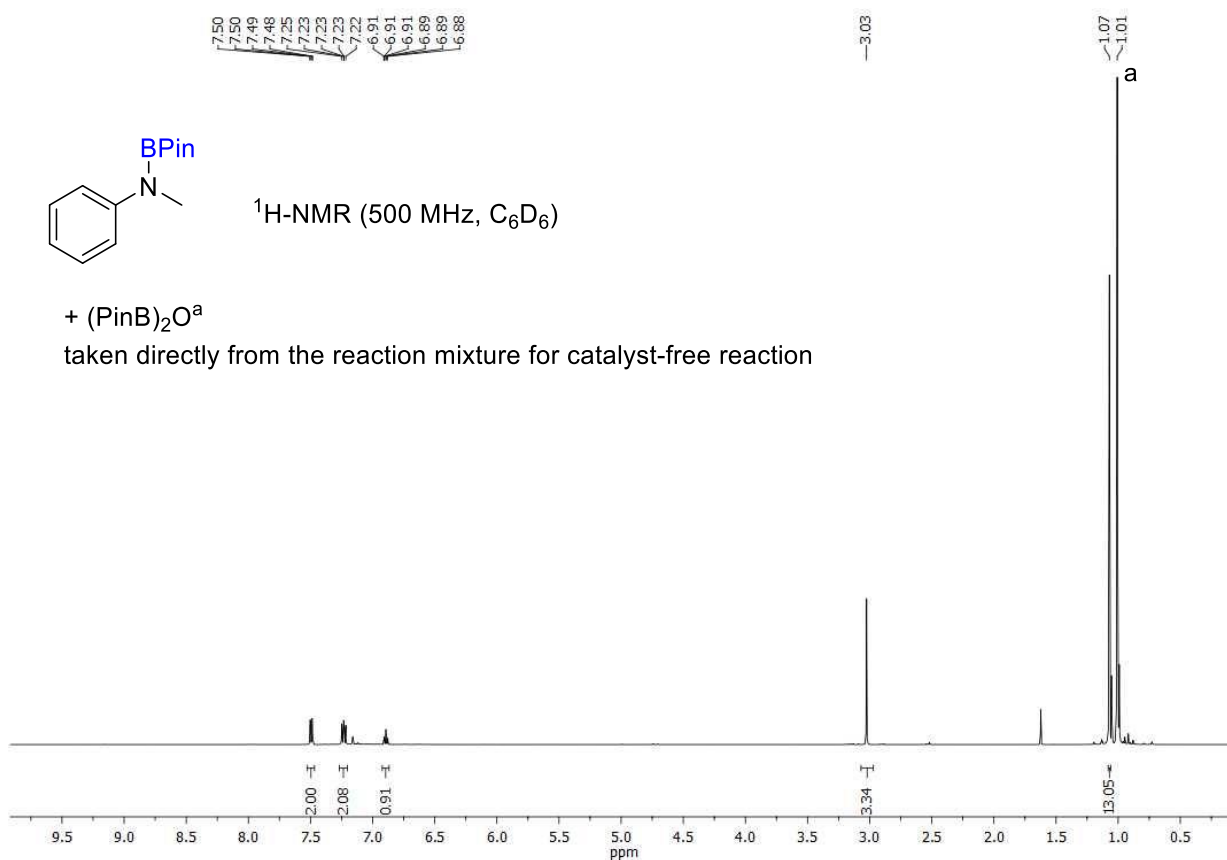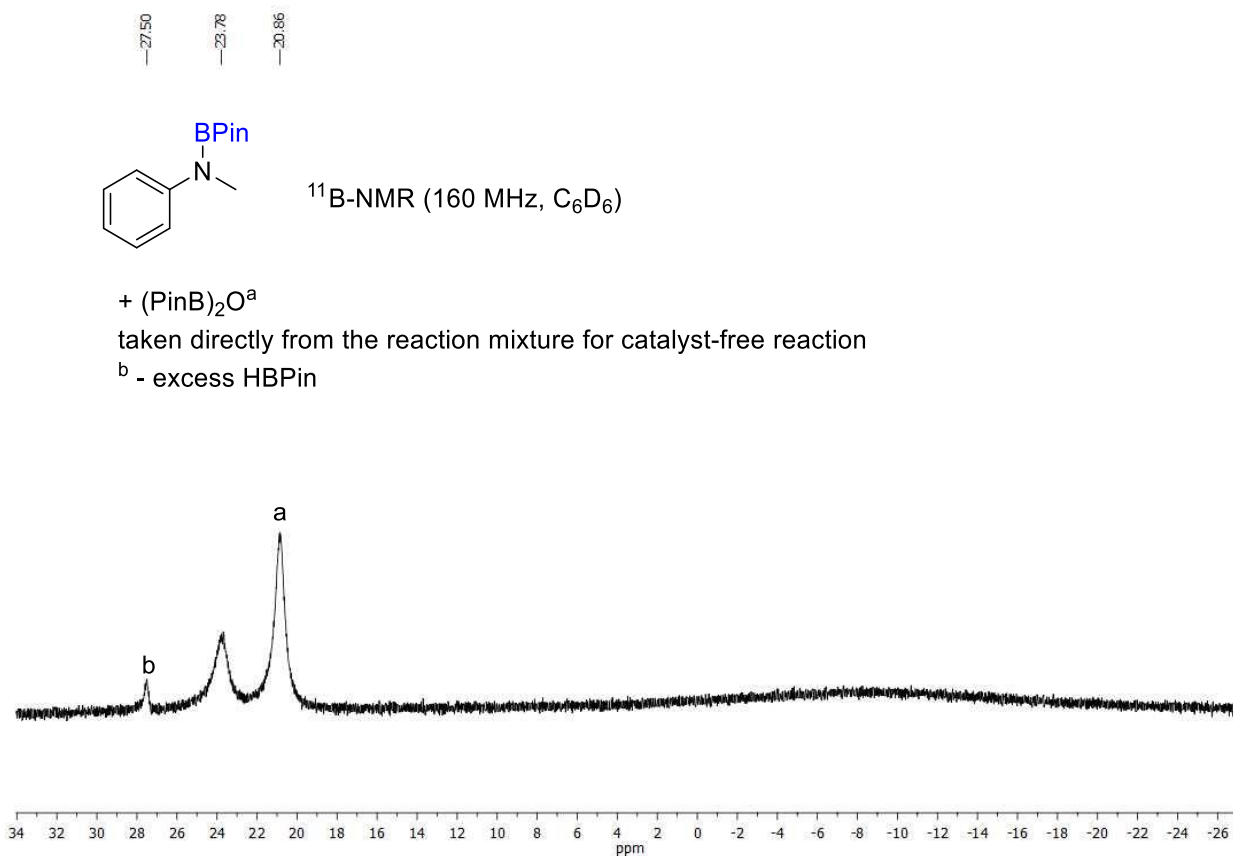

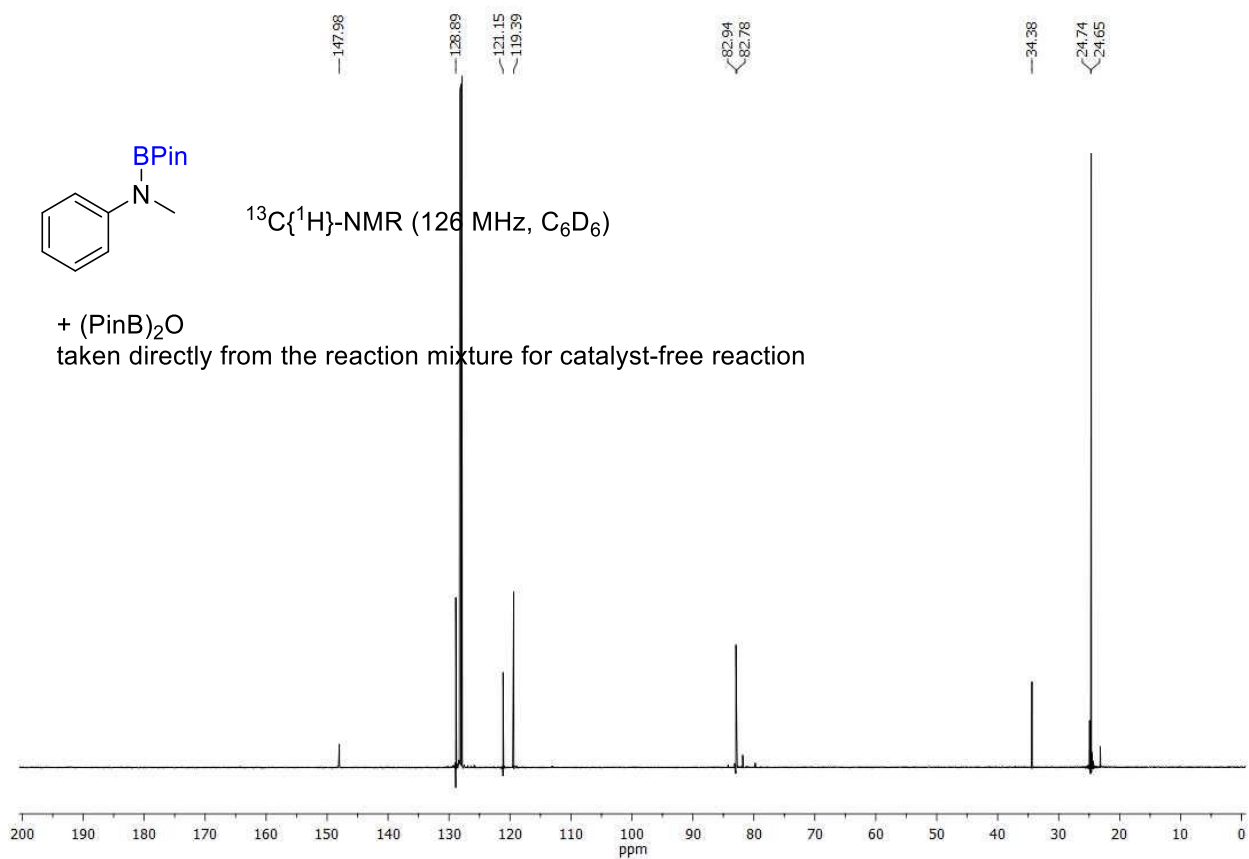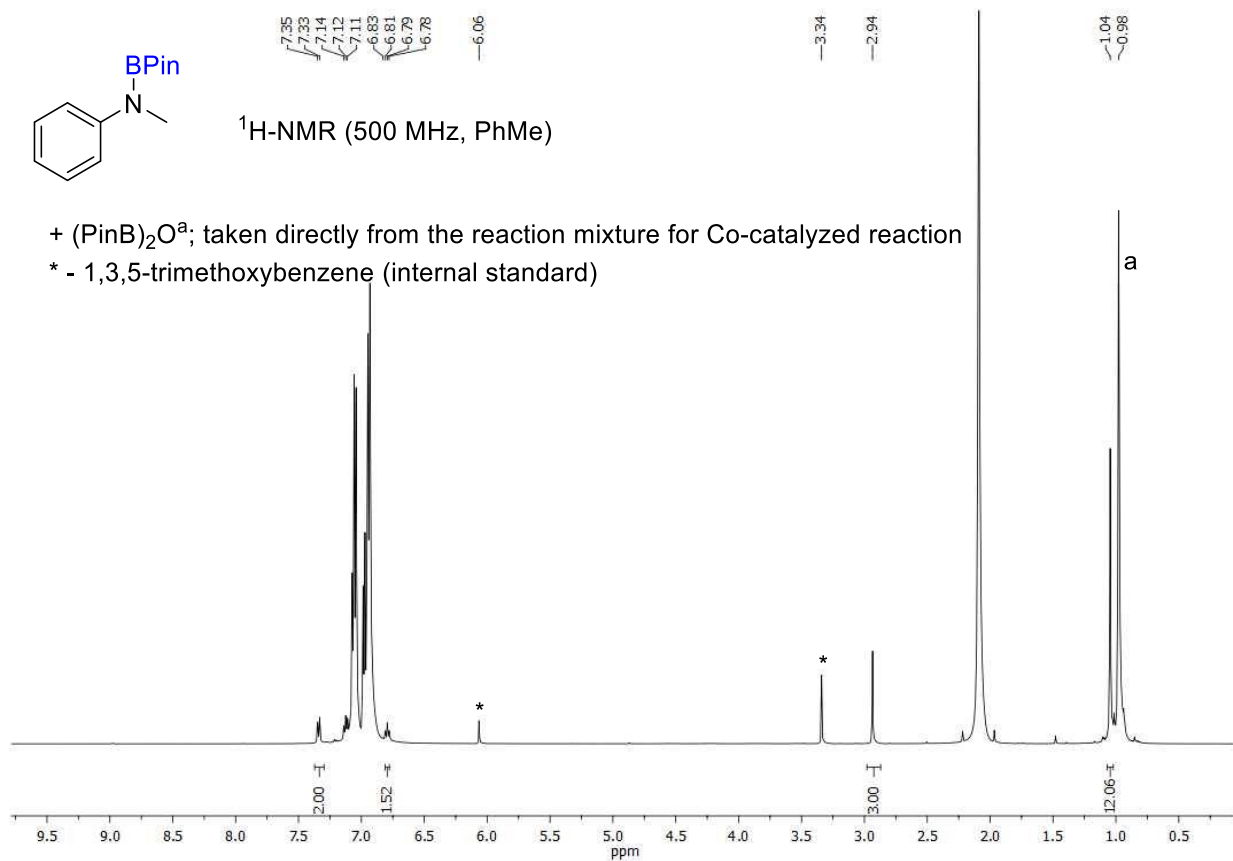

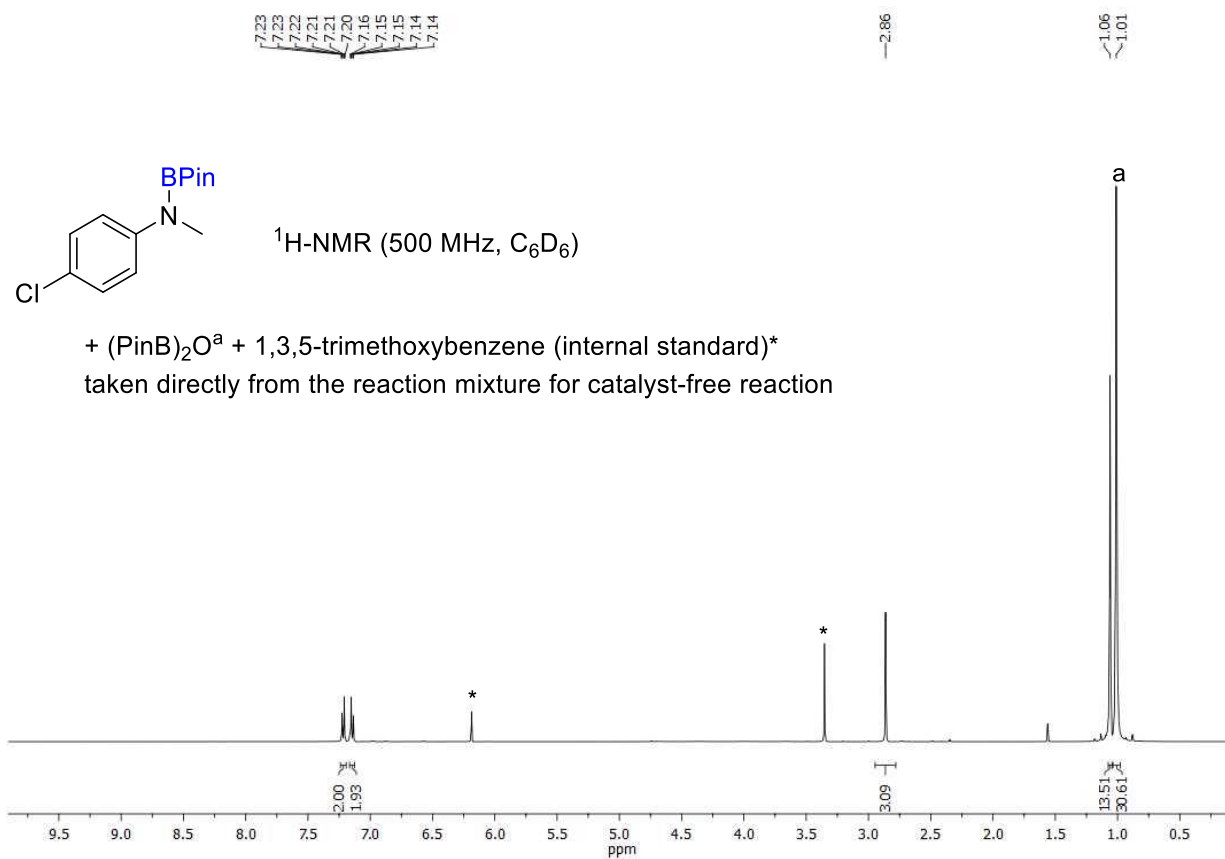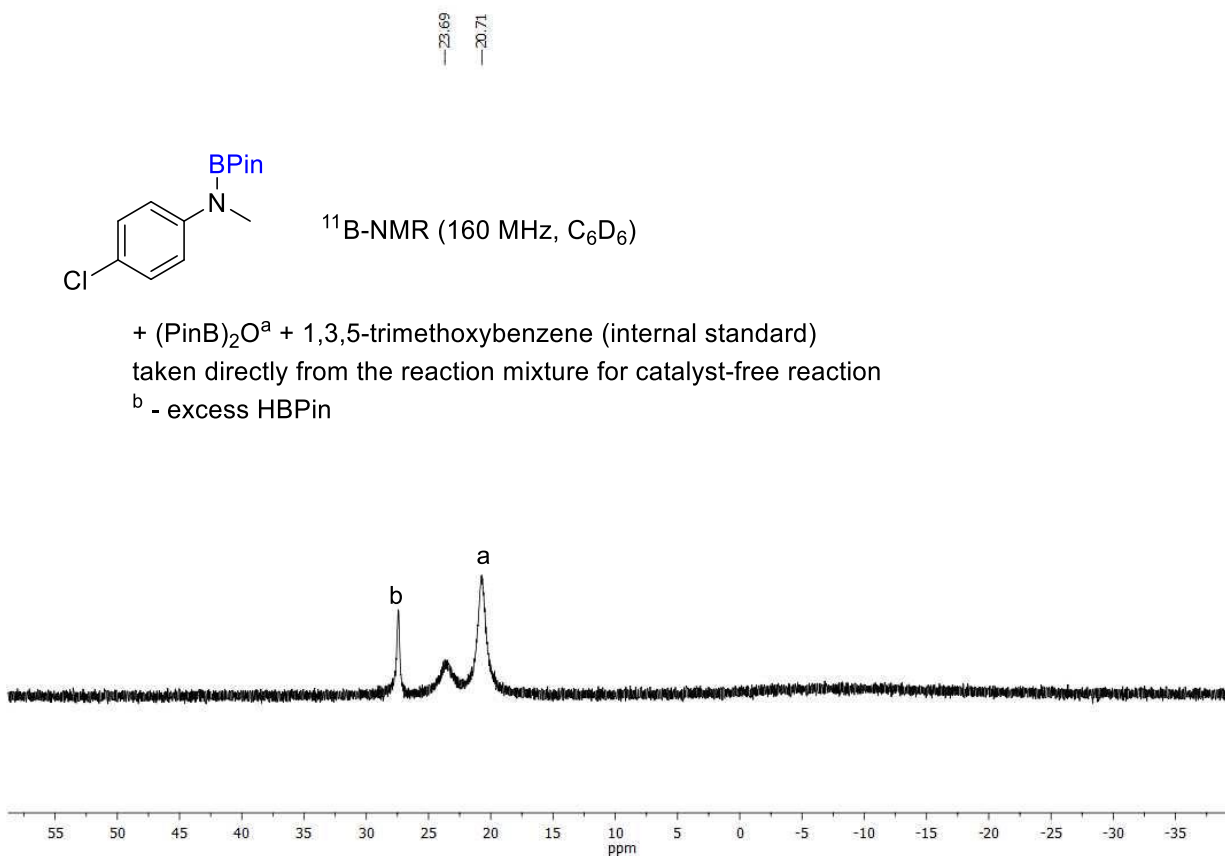

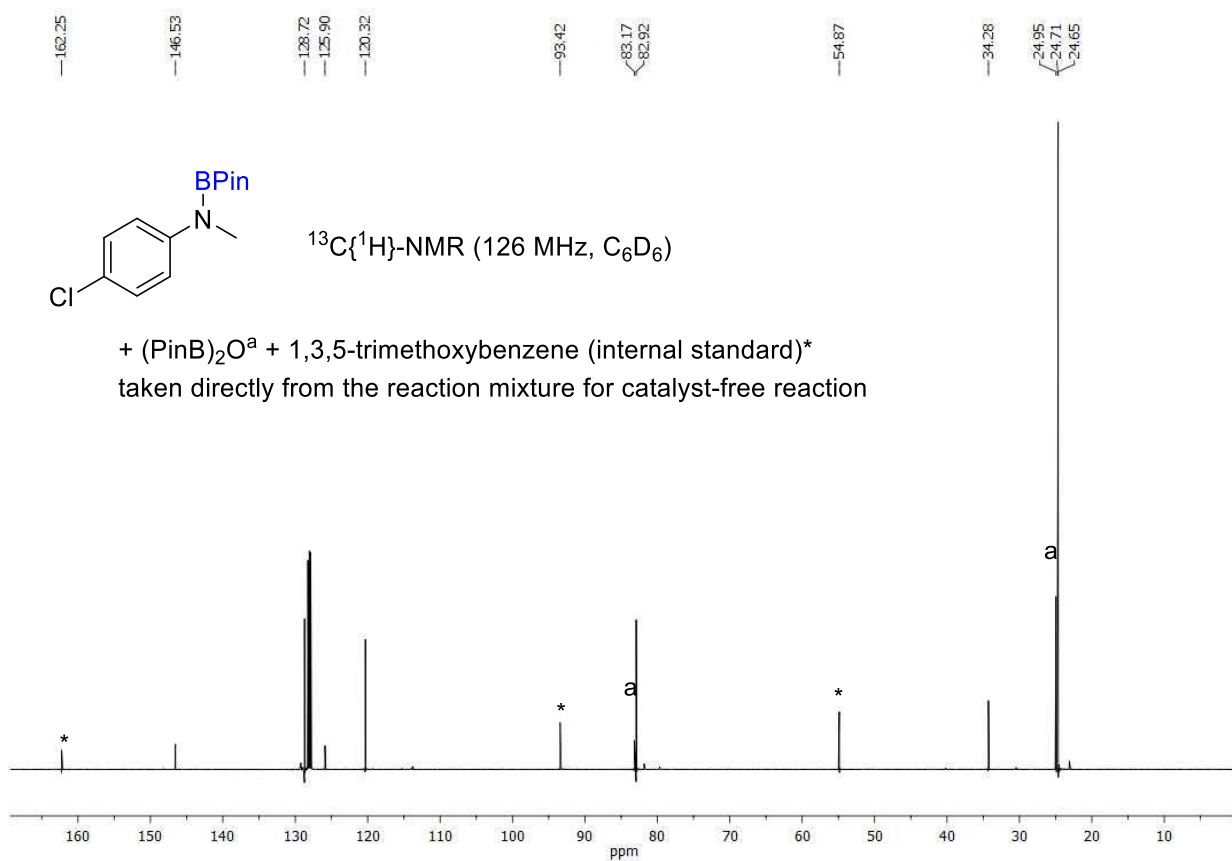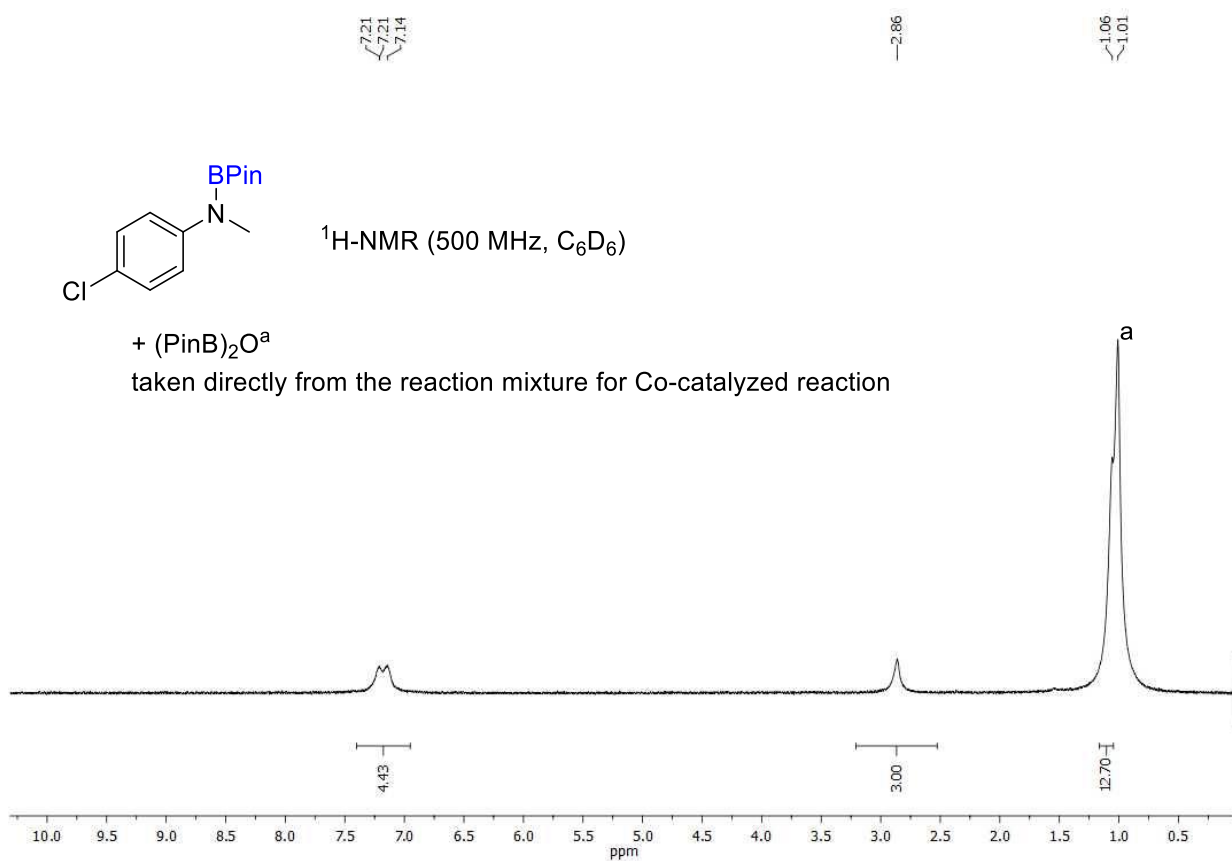

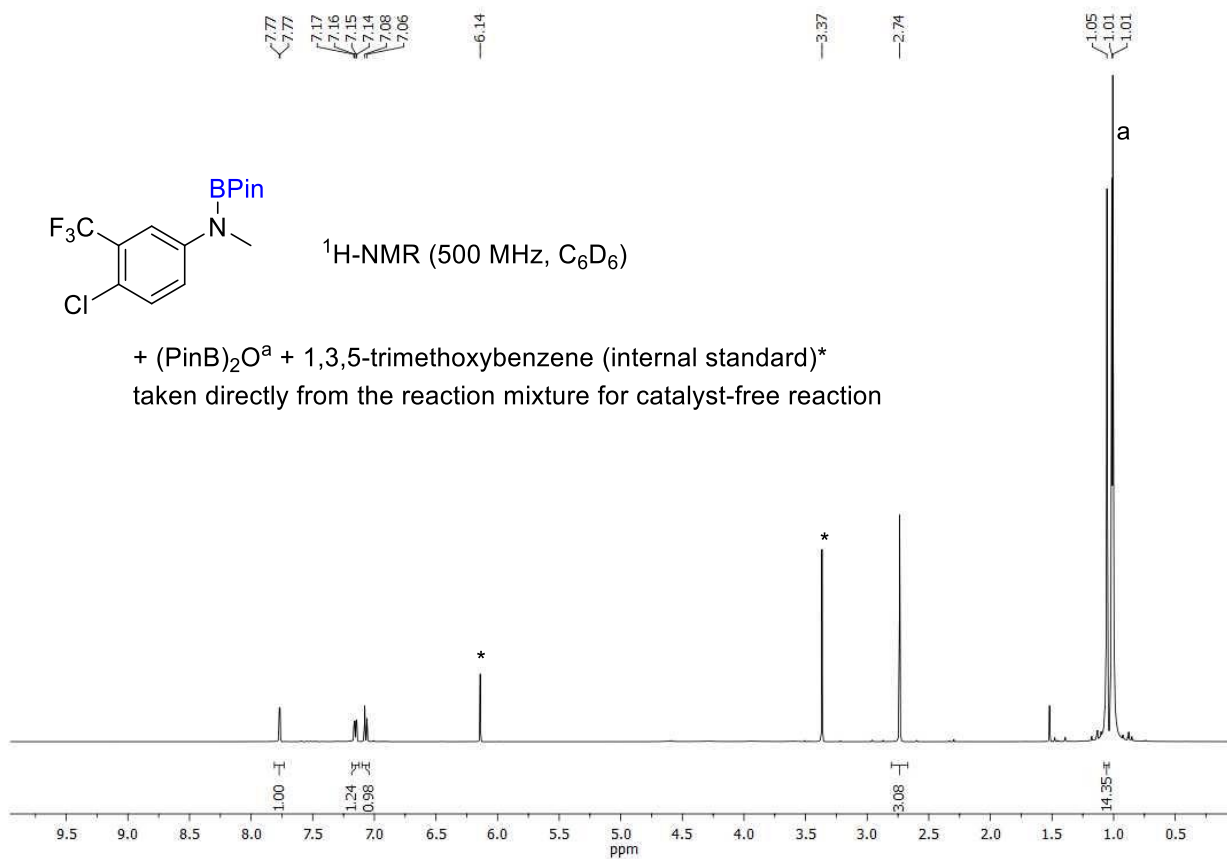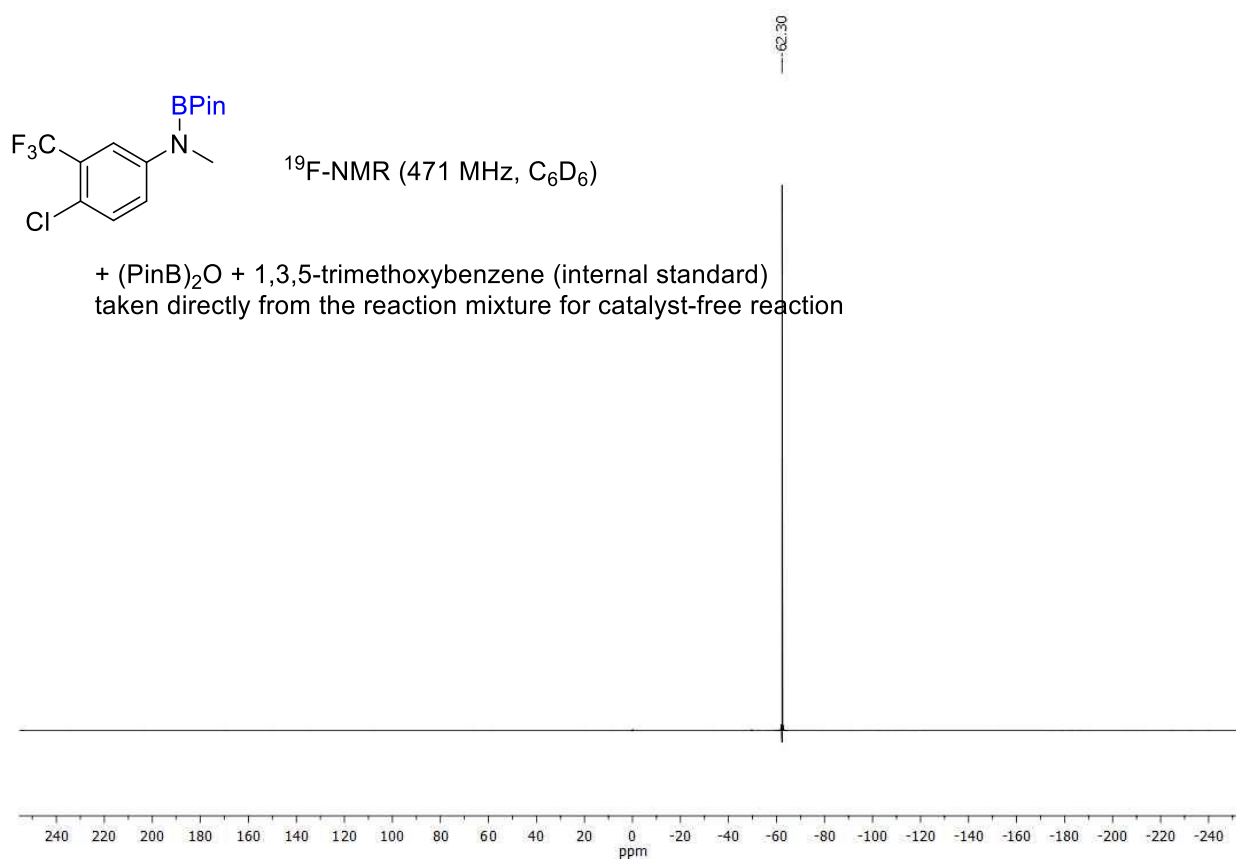

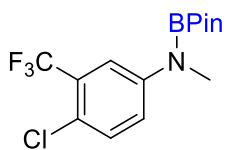

$^{11}\text{B}$ -NMR (160 MHz,  $\text{C}_6\text{D}_6$ )

—29.56  
—20.66

+  $(\text{PinB})_2\text{O}^{\text{a}}$  + 1,3,5-trimethoxybenzene (internal standard)  
taken directly from the reaction mixture for catalyst-free reaction  
b - excess HBPIn

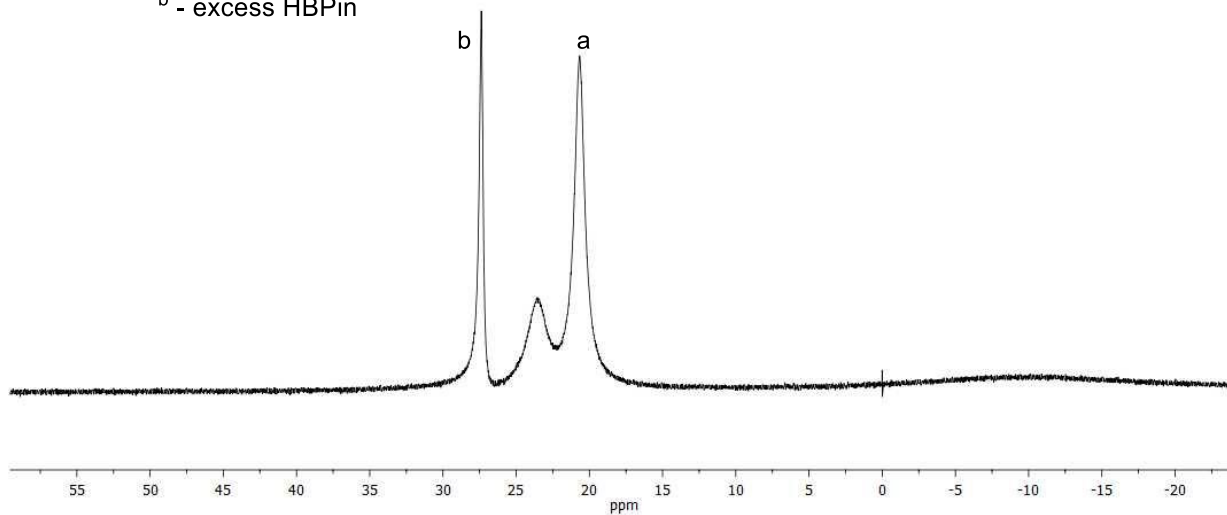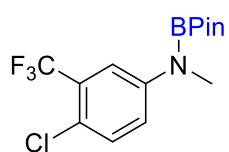

$^{13}\text{C}\{^1\text{H}\}$ -NMR (126 MHz,  $\text{C}_6\text{D}_6$ )

+  $(\text{PinB})_2\text{O}^{\text{a}}$  + 1,3,5-trimethoxybenzene (internal standard)\*  
taken directly from the reaction mixture for catalyst-free reaction

—162.24    —146.77    —131.65    —122.80    —122.79    —122.43    —117.71    —117.67    —117.62    —117.58    —93.40    —83.19    —82.93    —54.87    —33.88    —24.94    —24.64

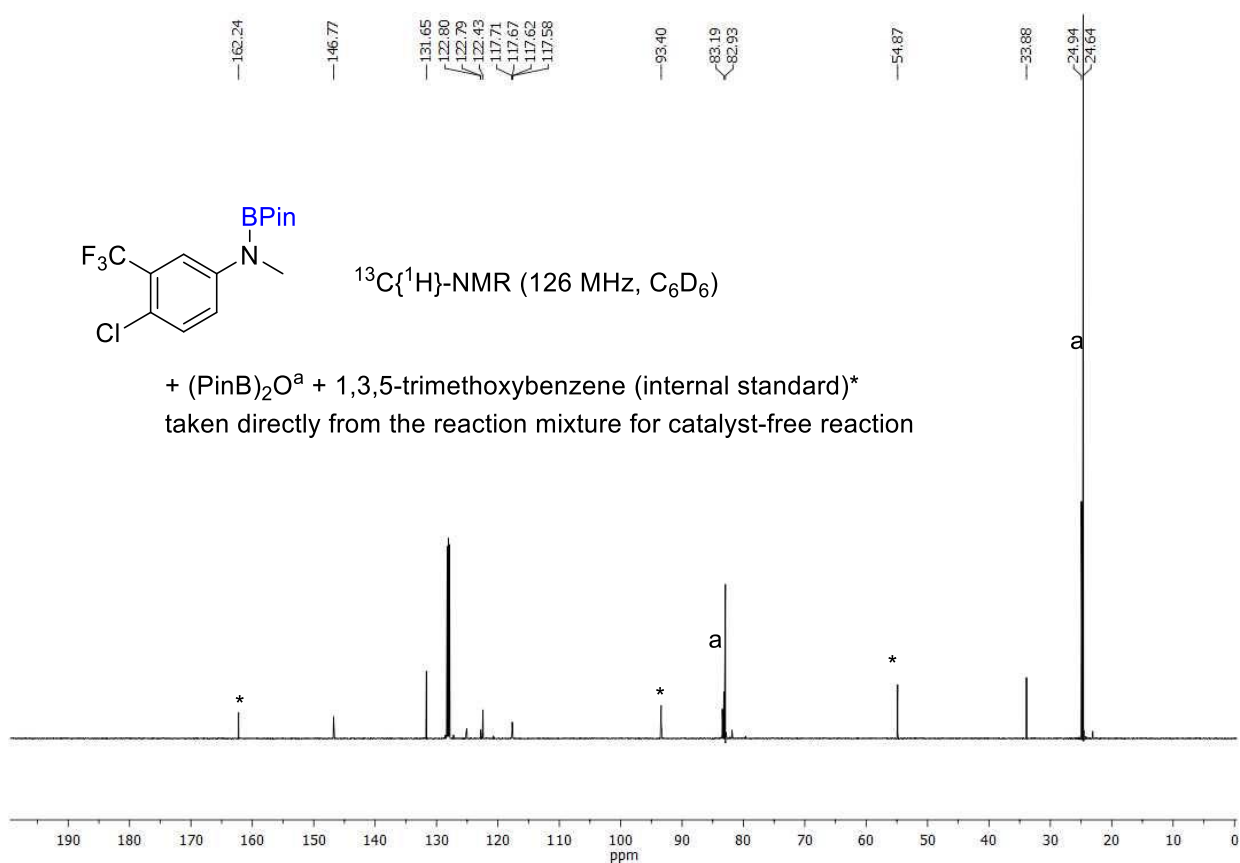



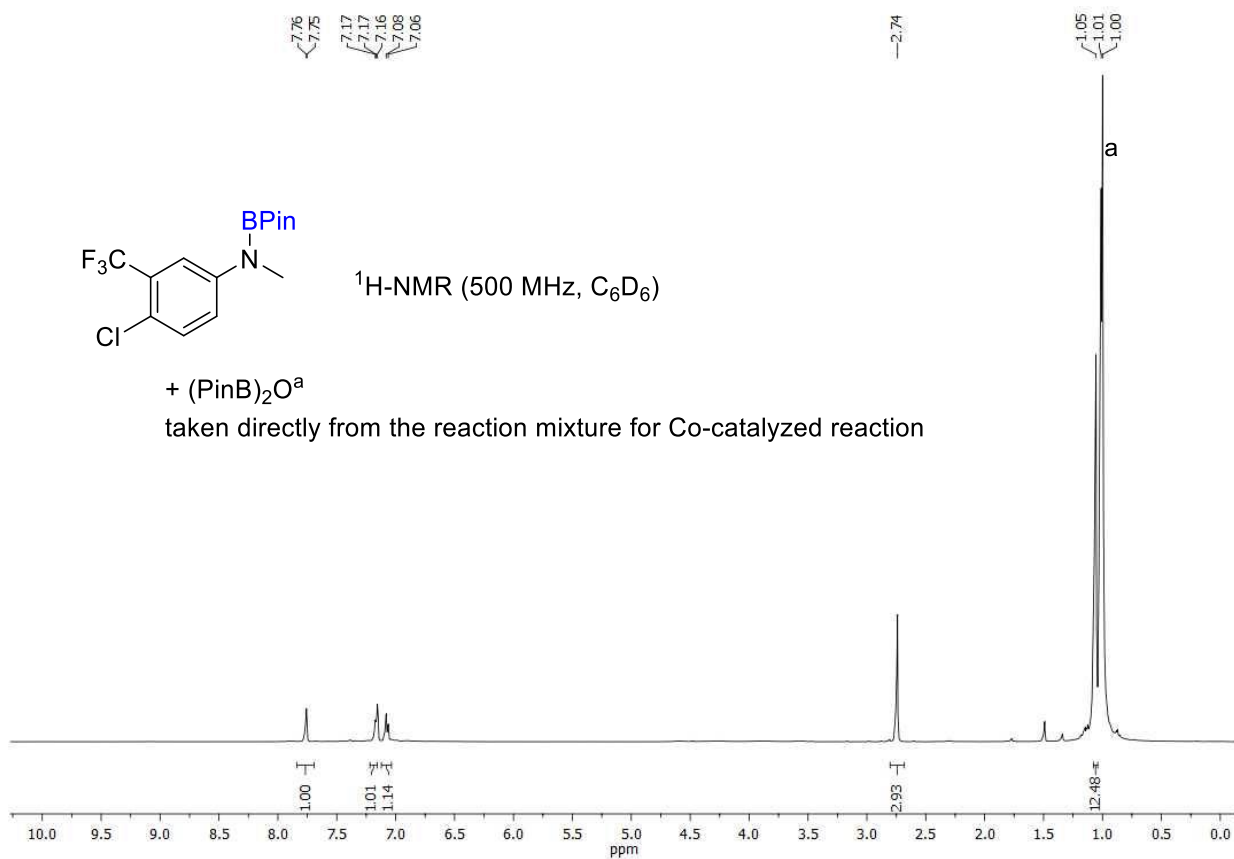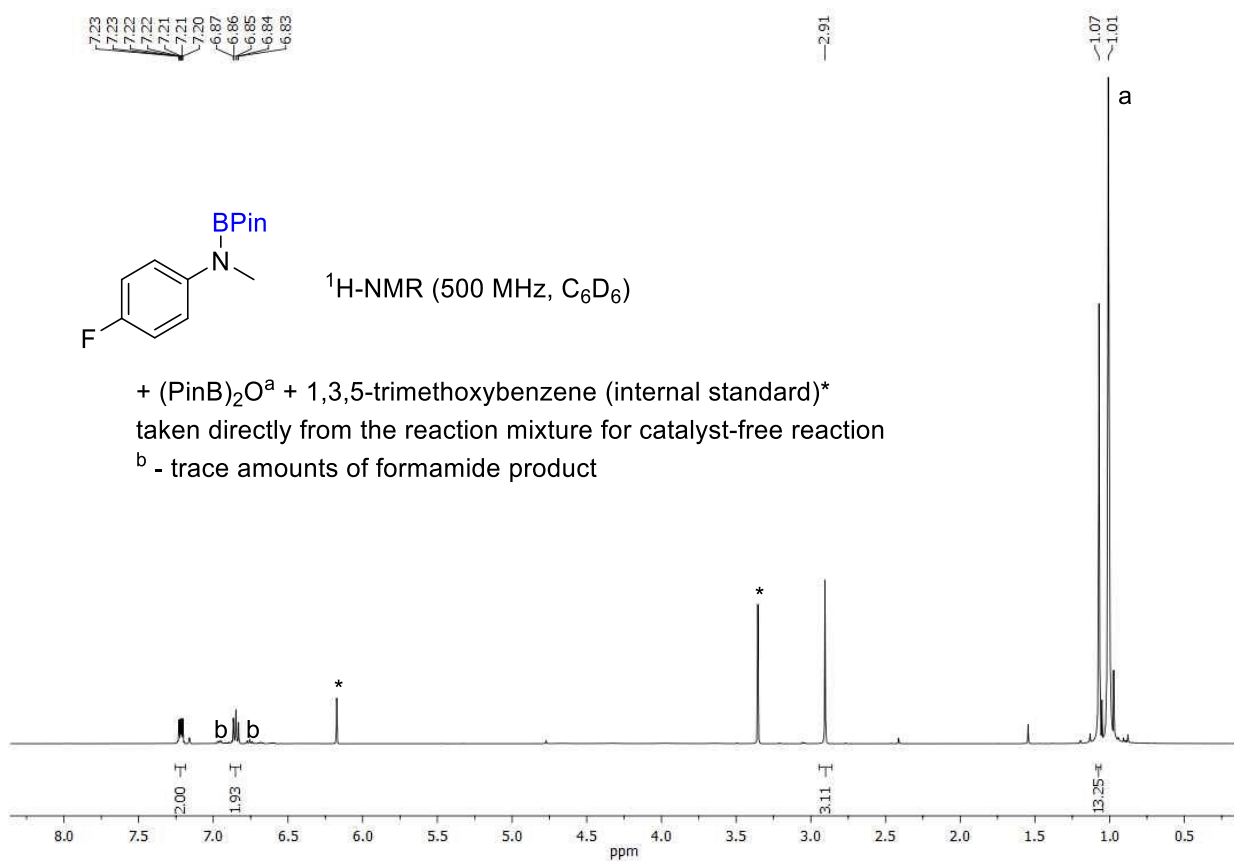

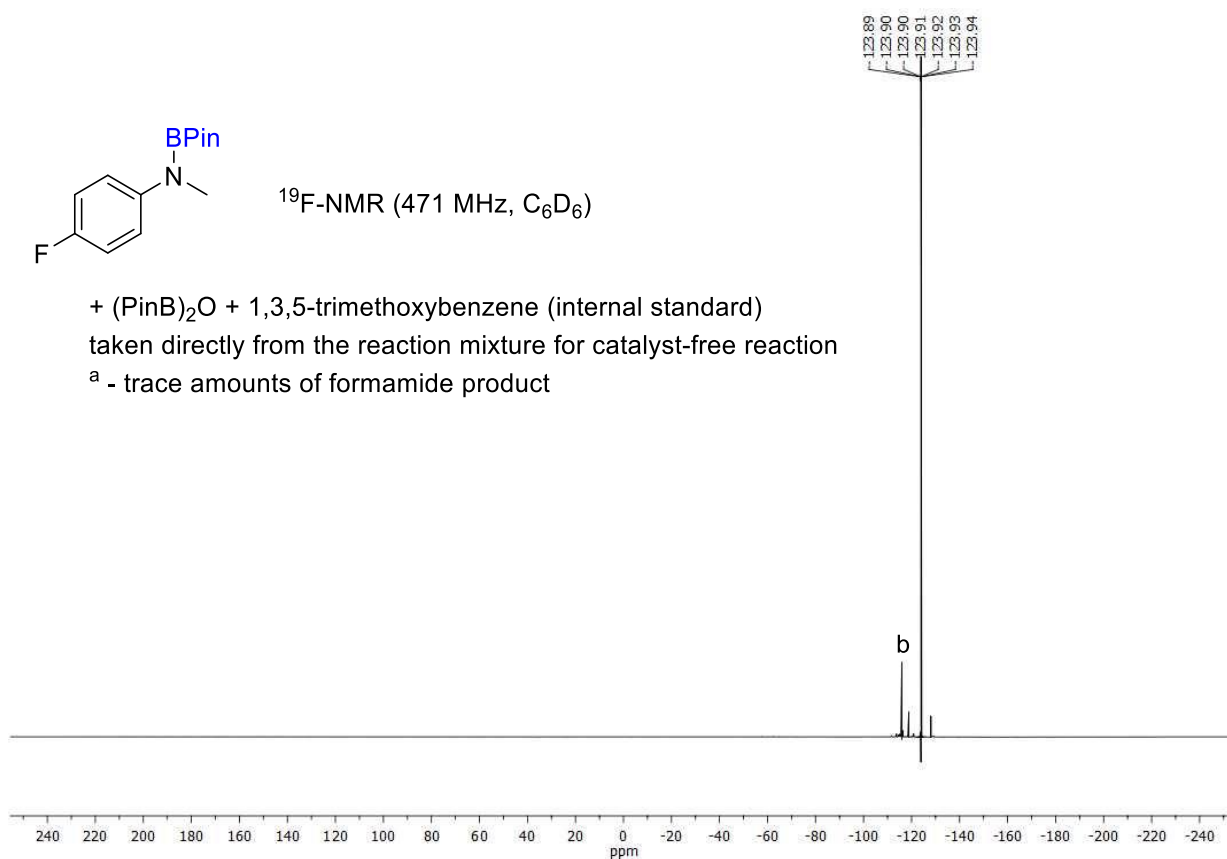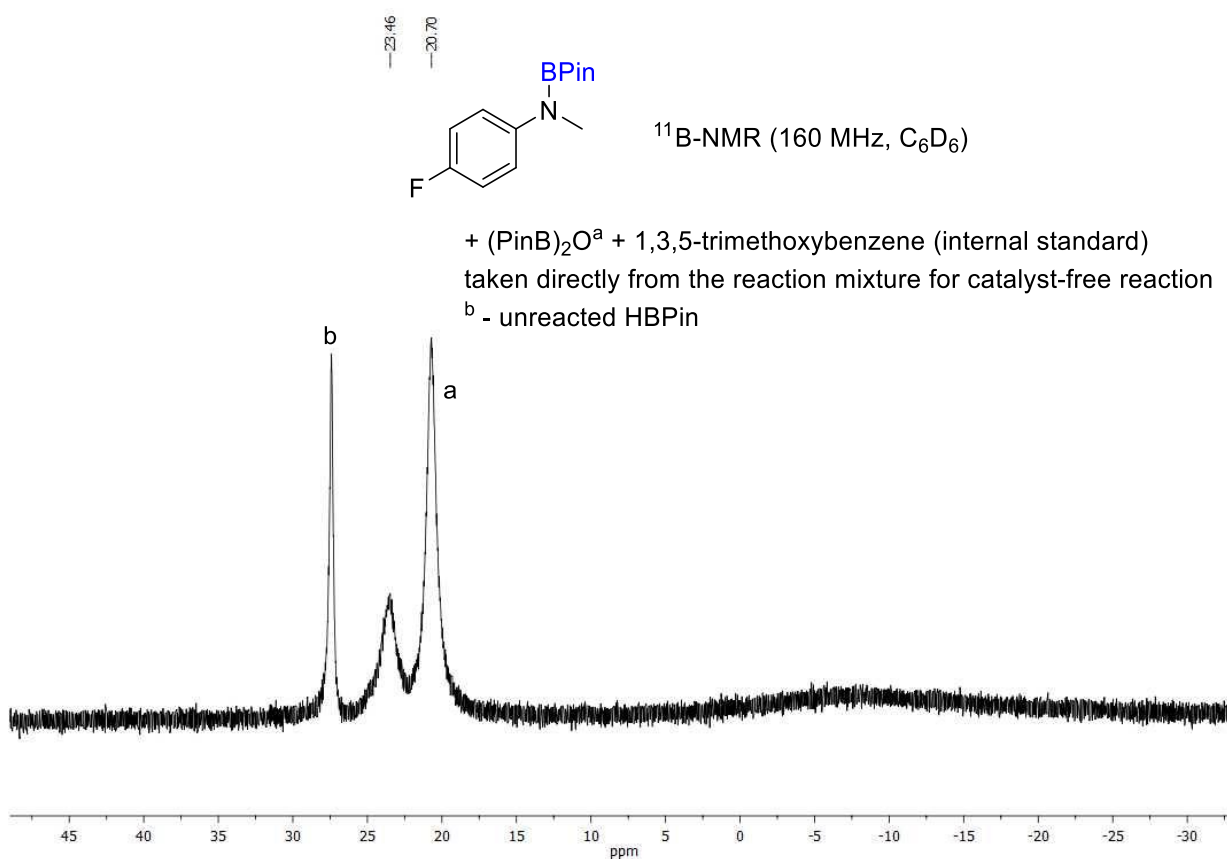

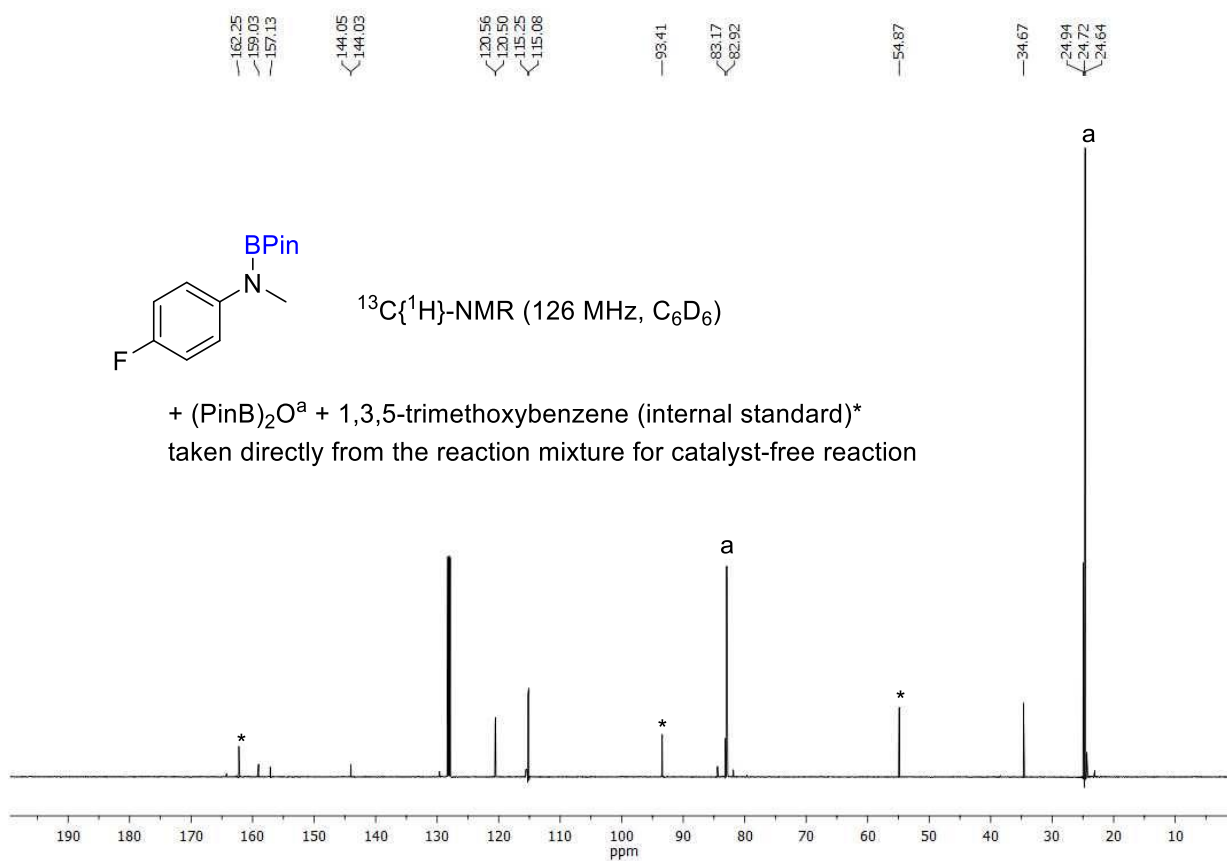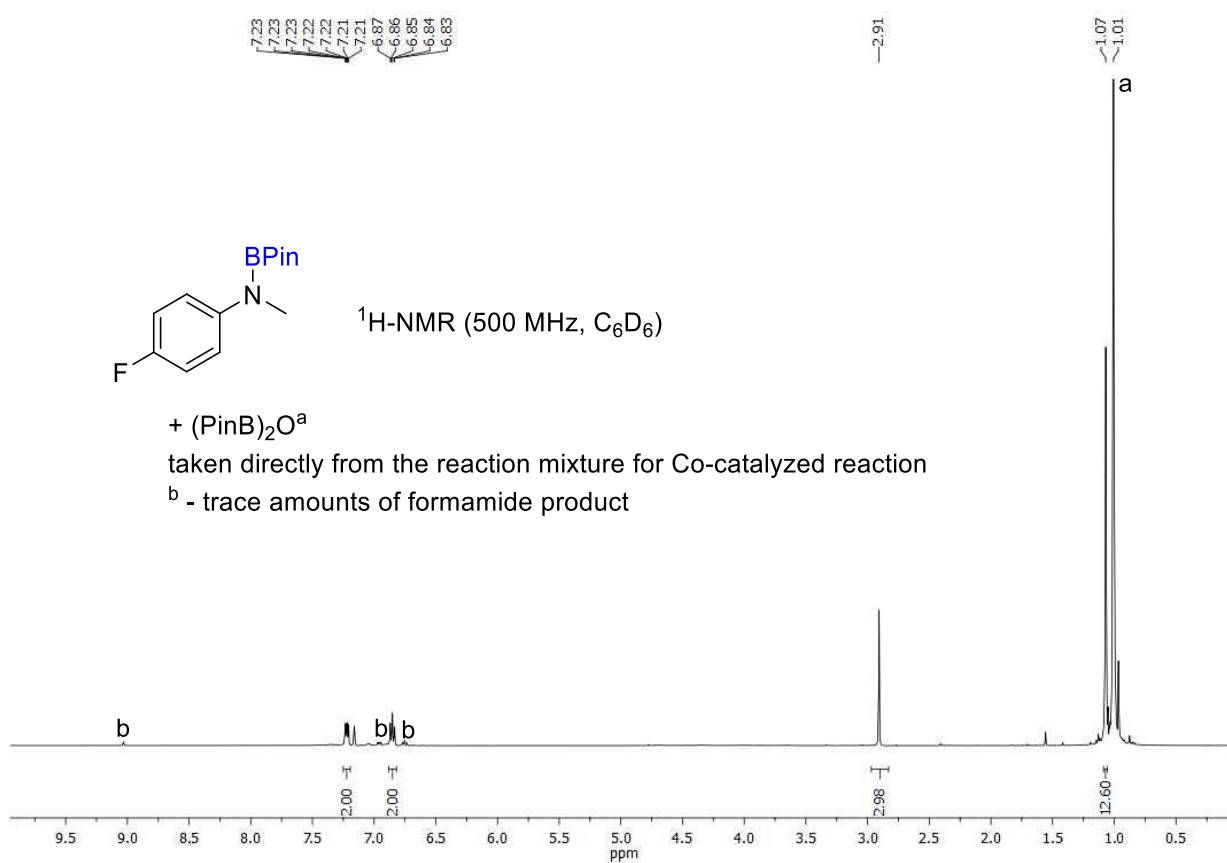

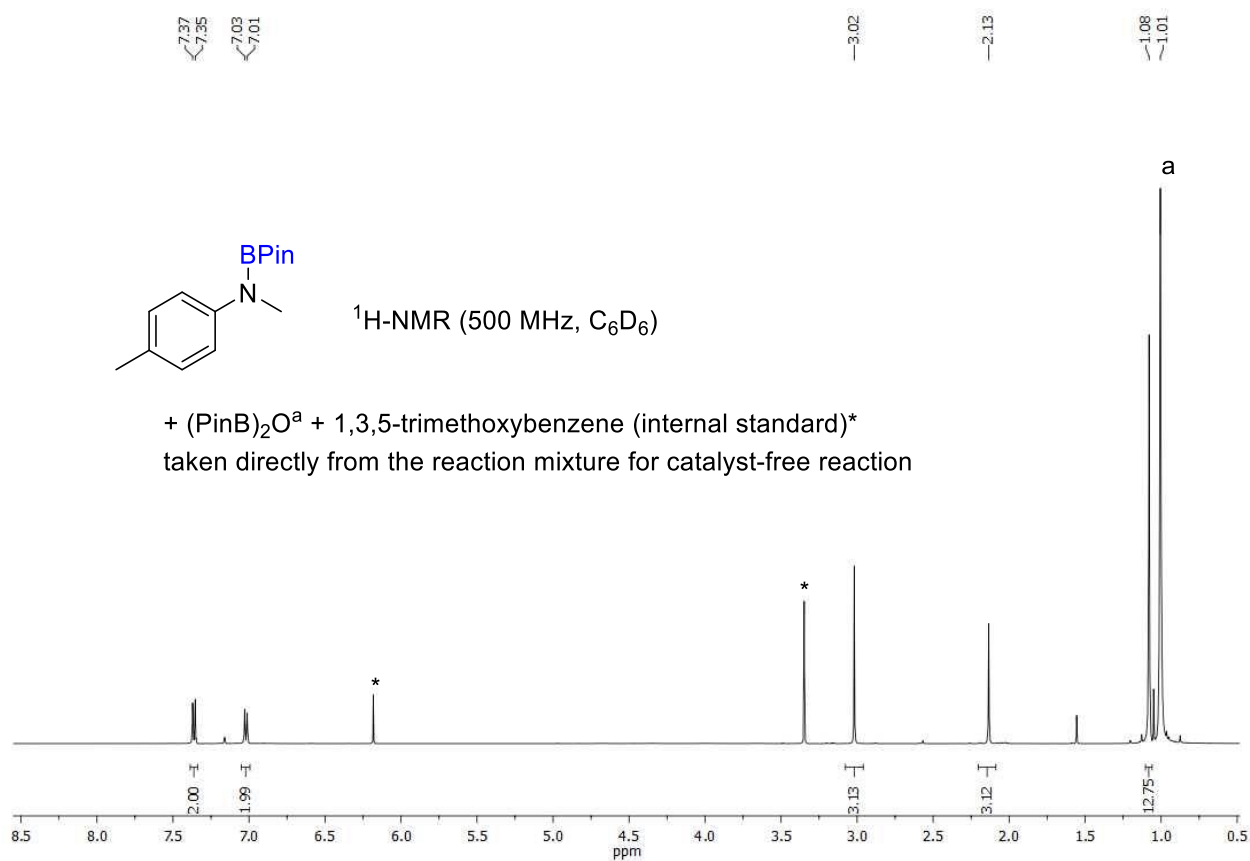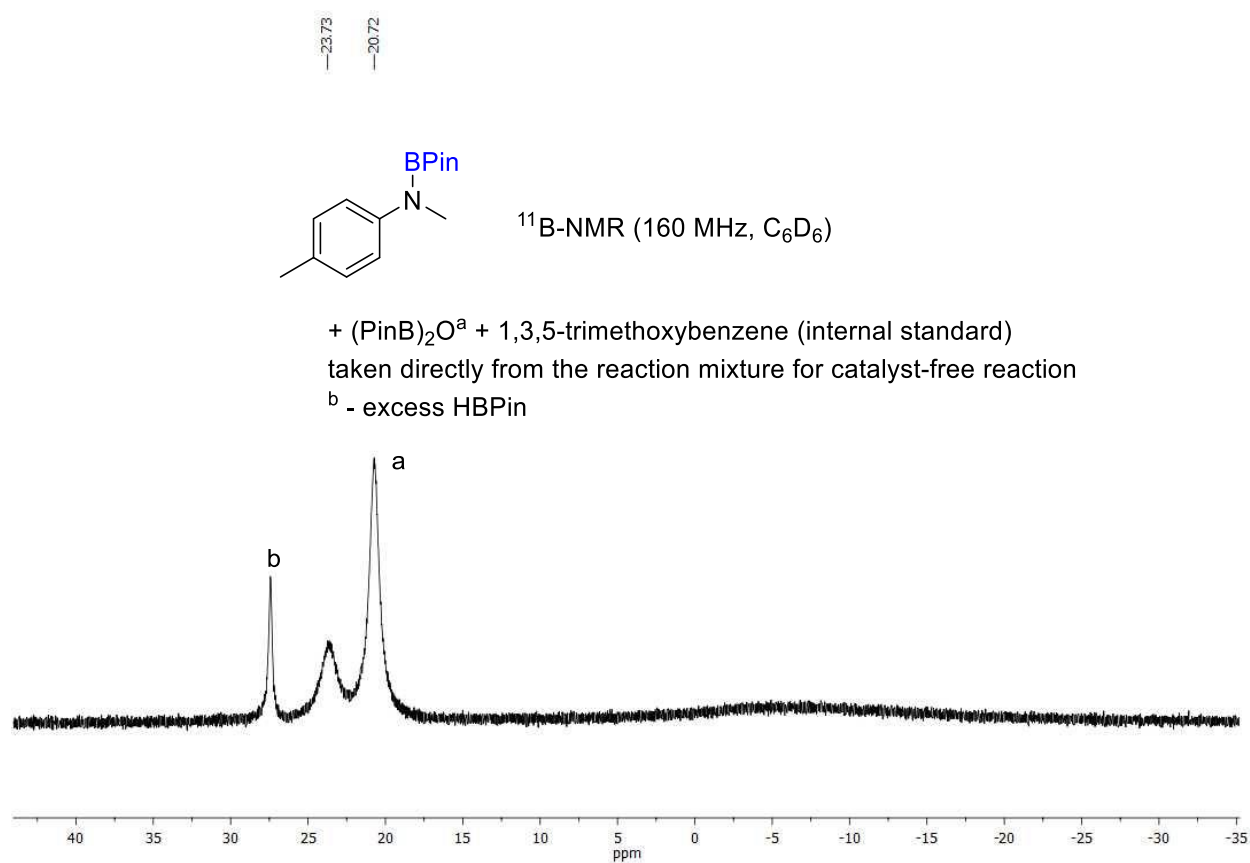

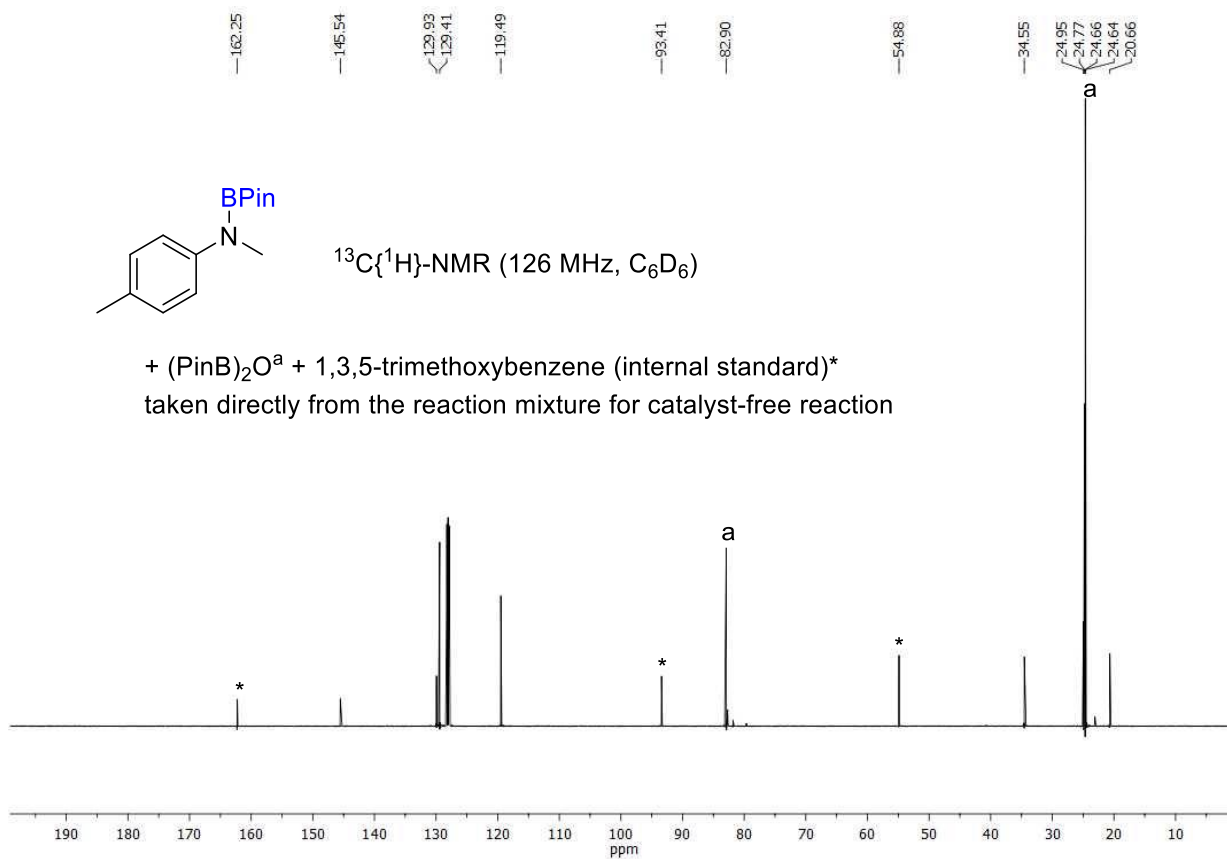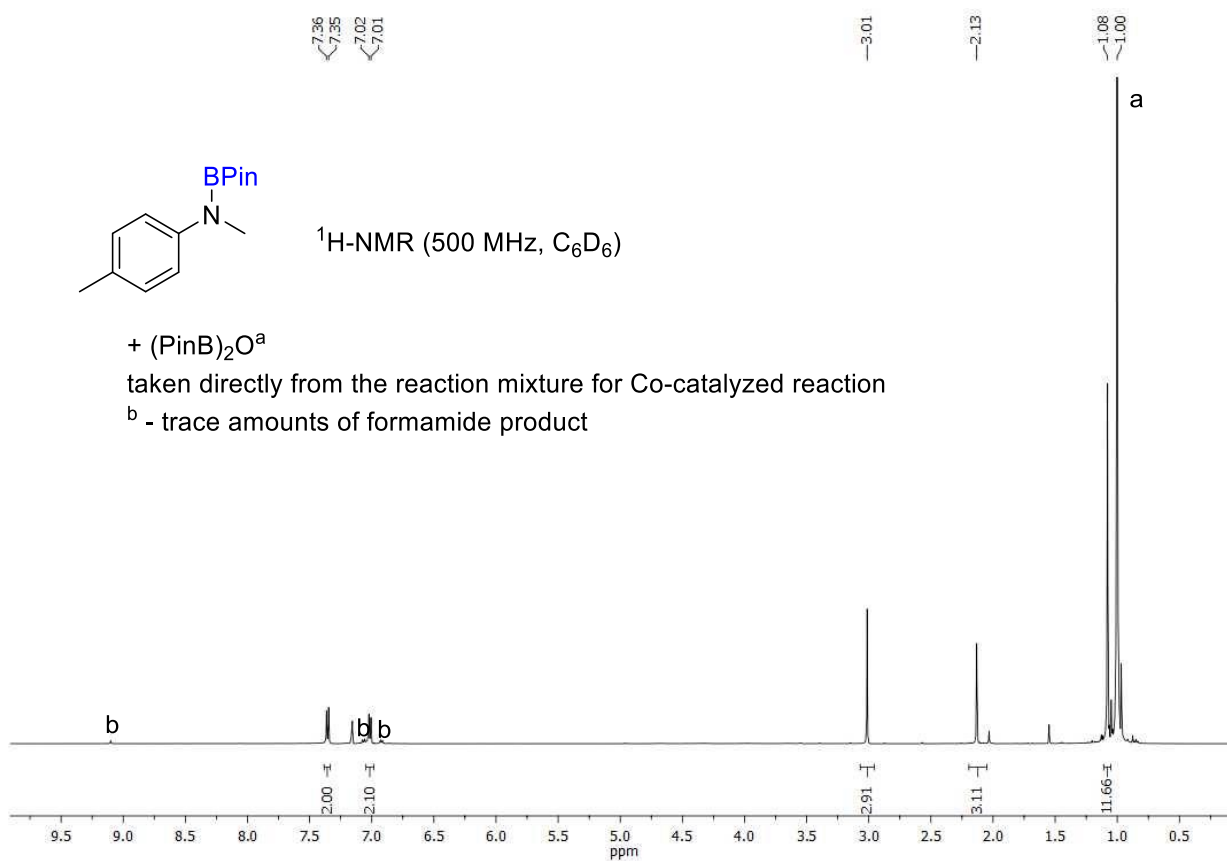

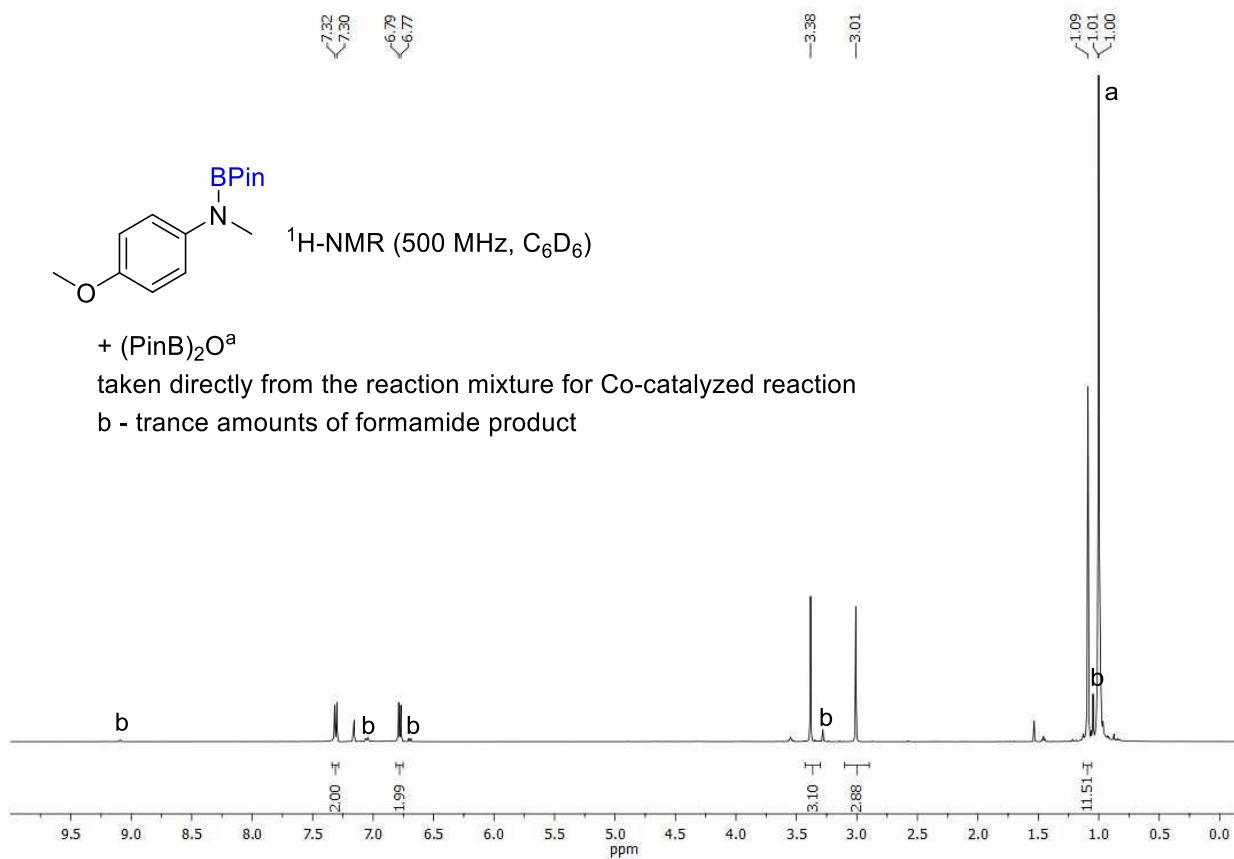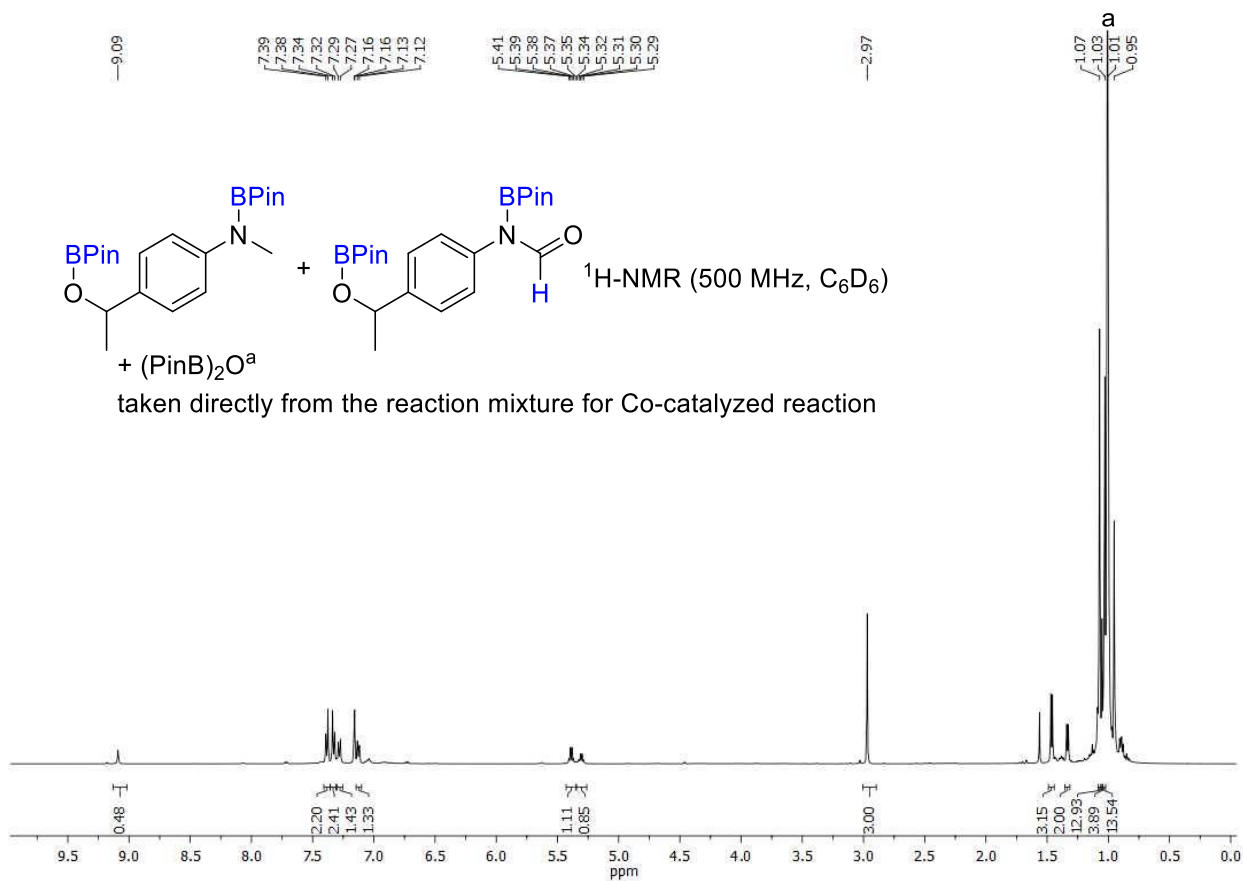

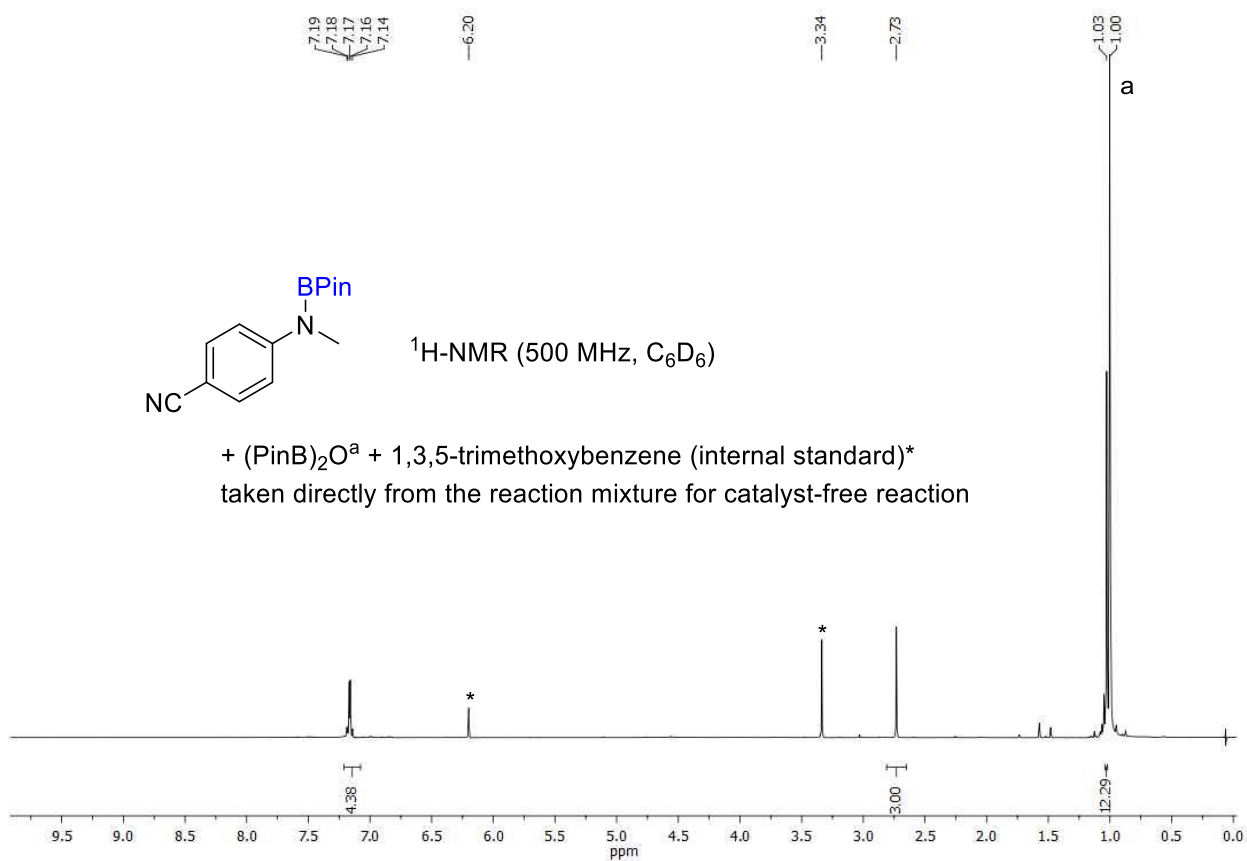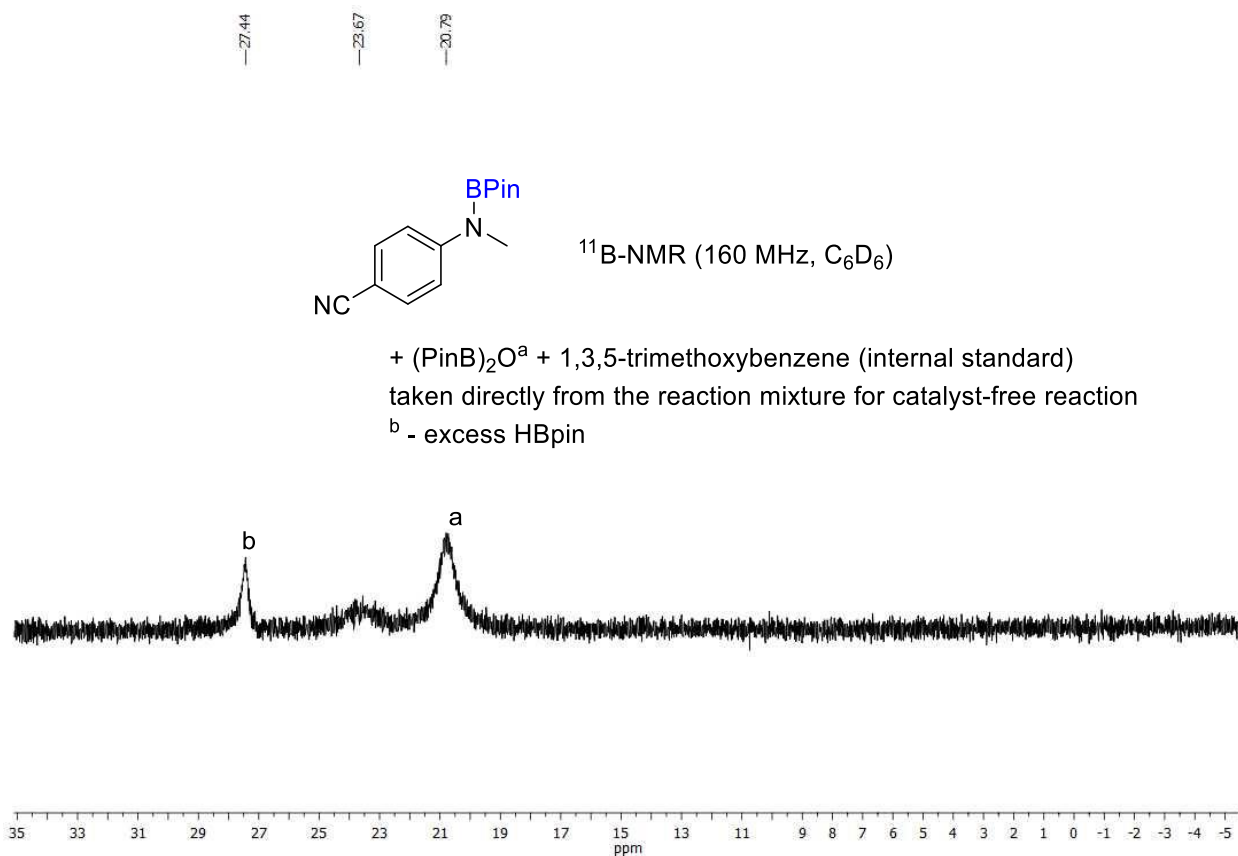

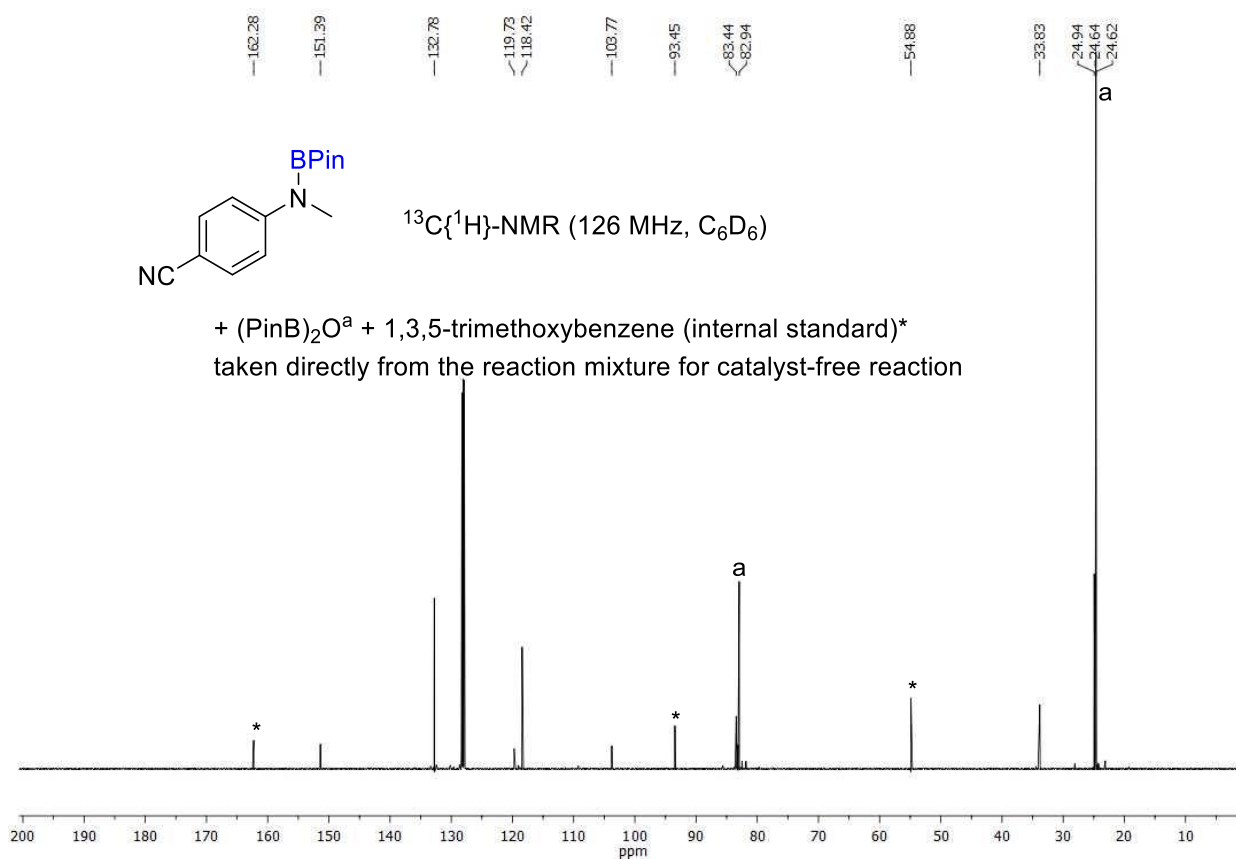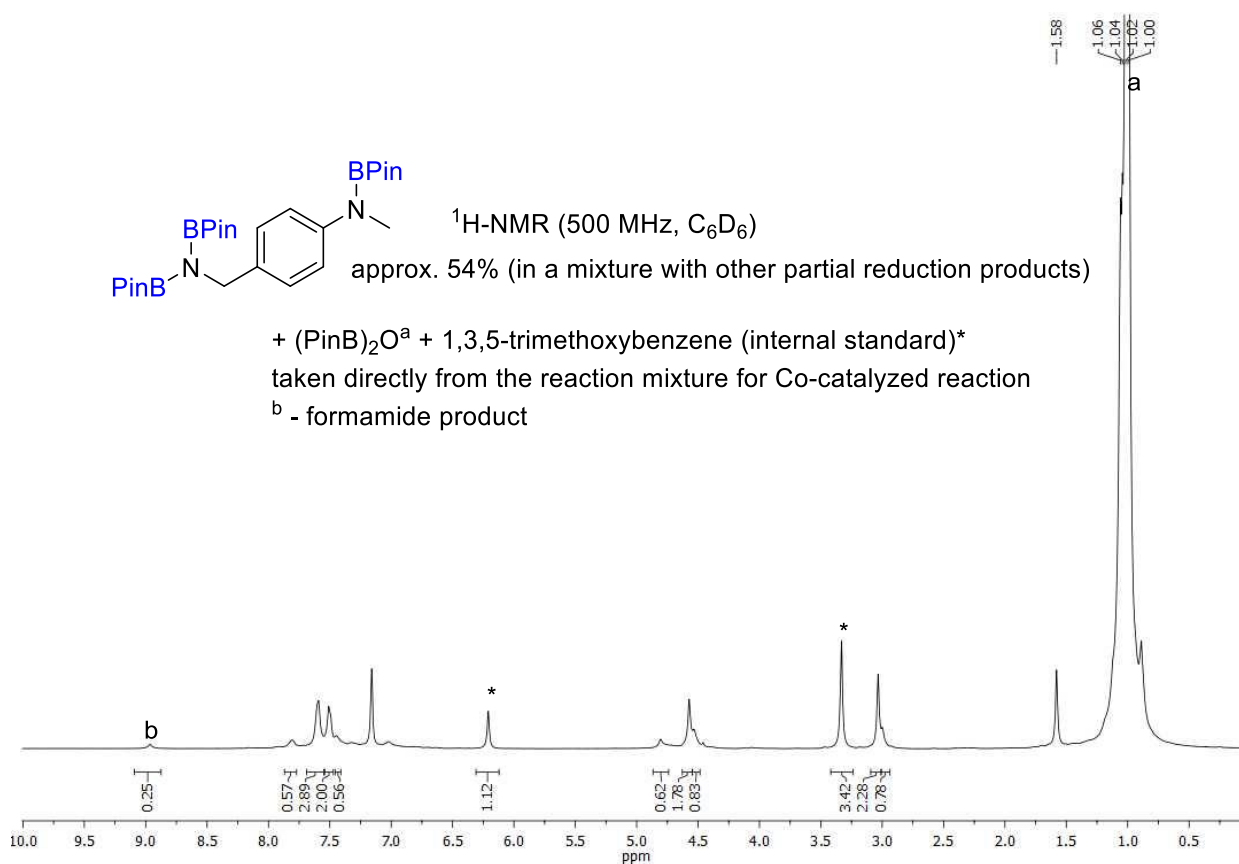



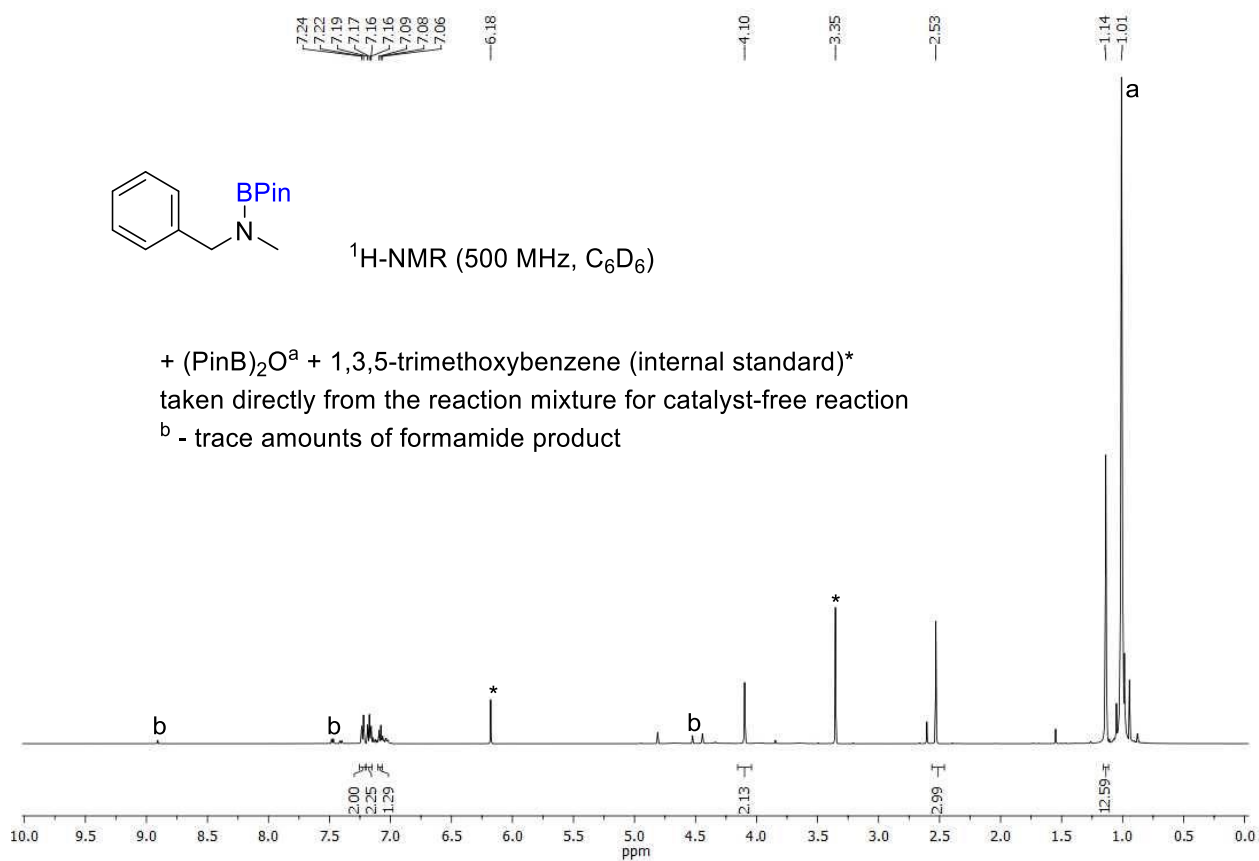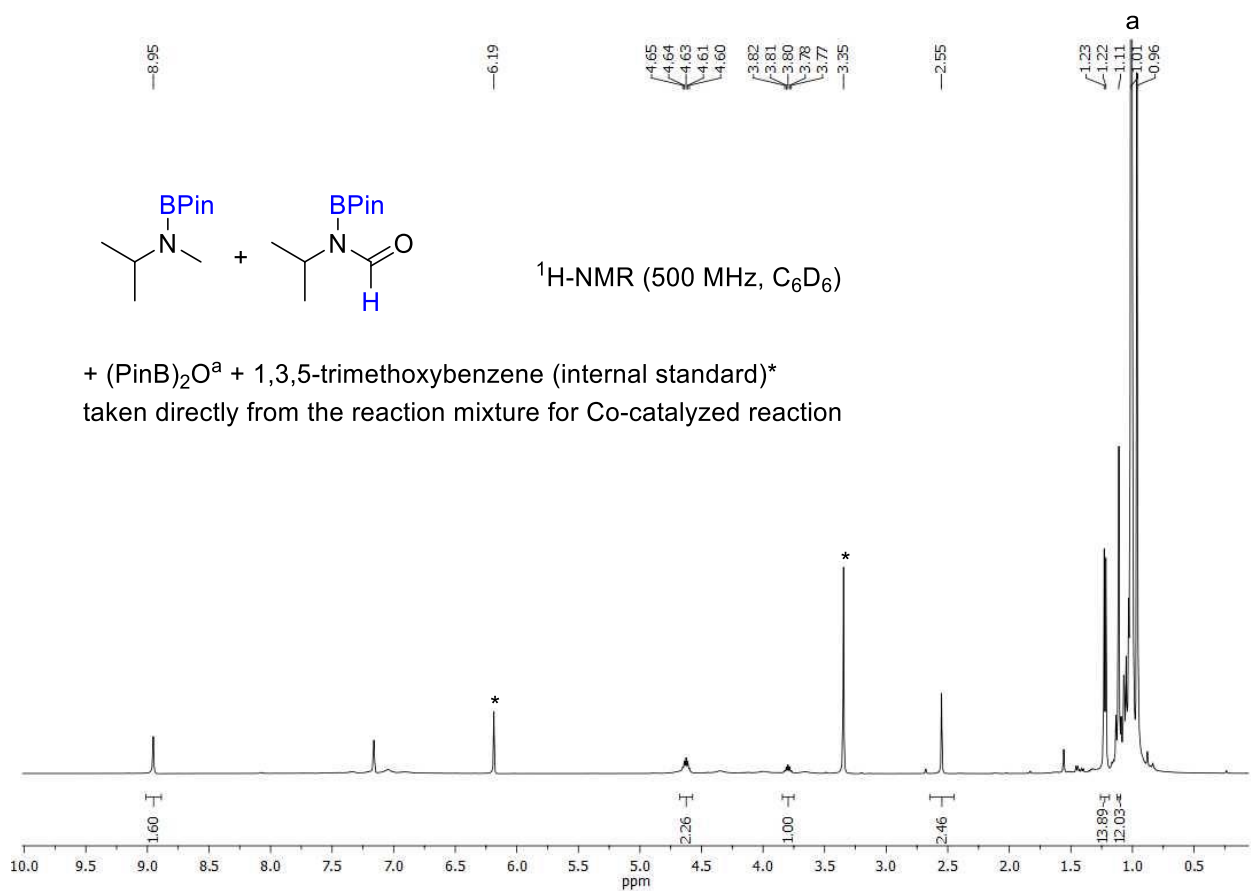

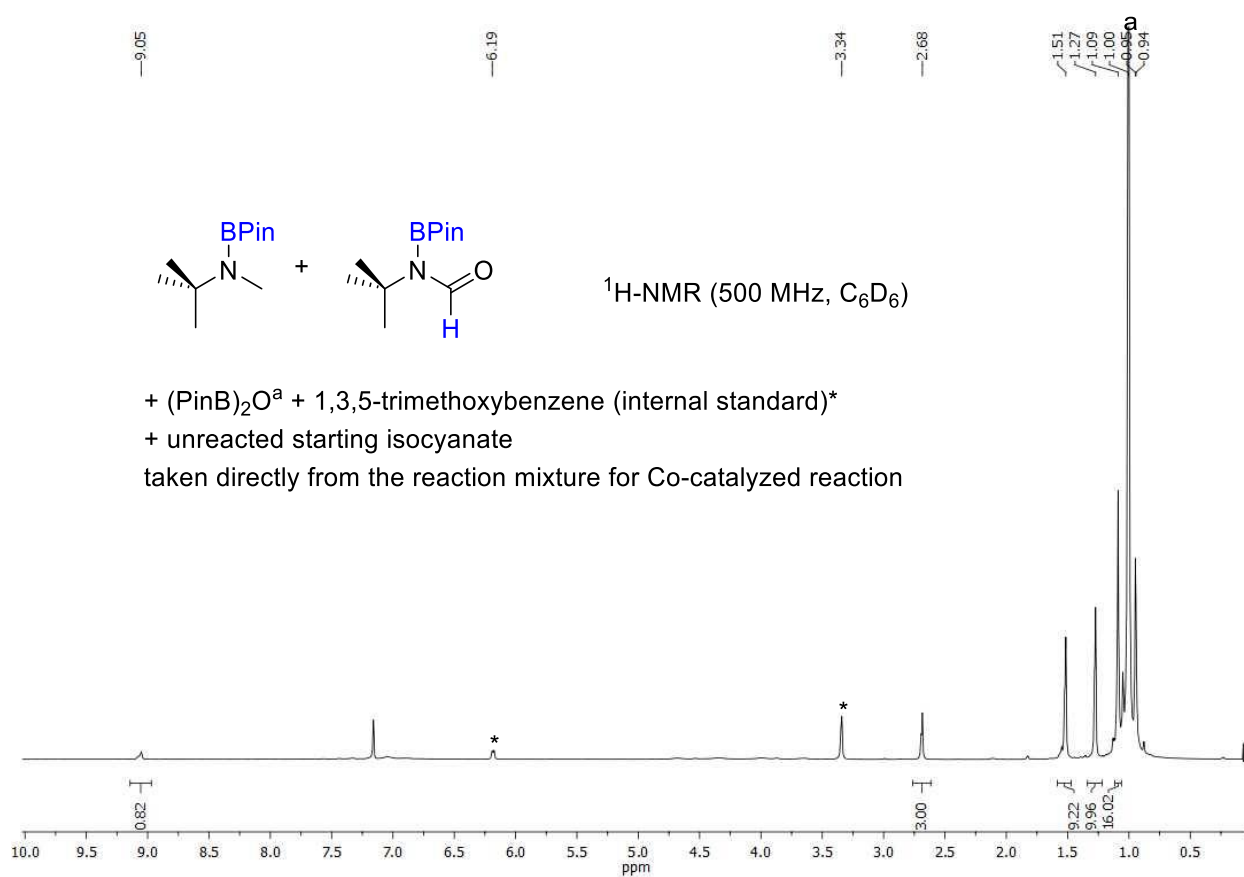

NMR spectra for borylated *N*-methylaniline,<sup>14,15</sup> 4-chloro-*N*-methylaniline,<sup>13</sup> 4-fluoro-*N*-methylaniline,<sup>13</sup> 4-methyl-*N*-methylaniline,<sup>13</sup> 4-methoxy-*N*-methylaniline,<sup>13</sup> 4-cyano-*N*-methylaniline,<sup>13</sup> *N*-methylbenzylamine,<sup>16</sup> *N*-methylisopropylamine,<sup>15</sup> and *N*-methyl-*tert*-butylamine<sup>15</sup> are consistent with those reported in the literature.

## 7. NMR spectra for isolated N-methylamine hydrochloride salts

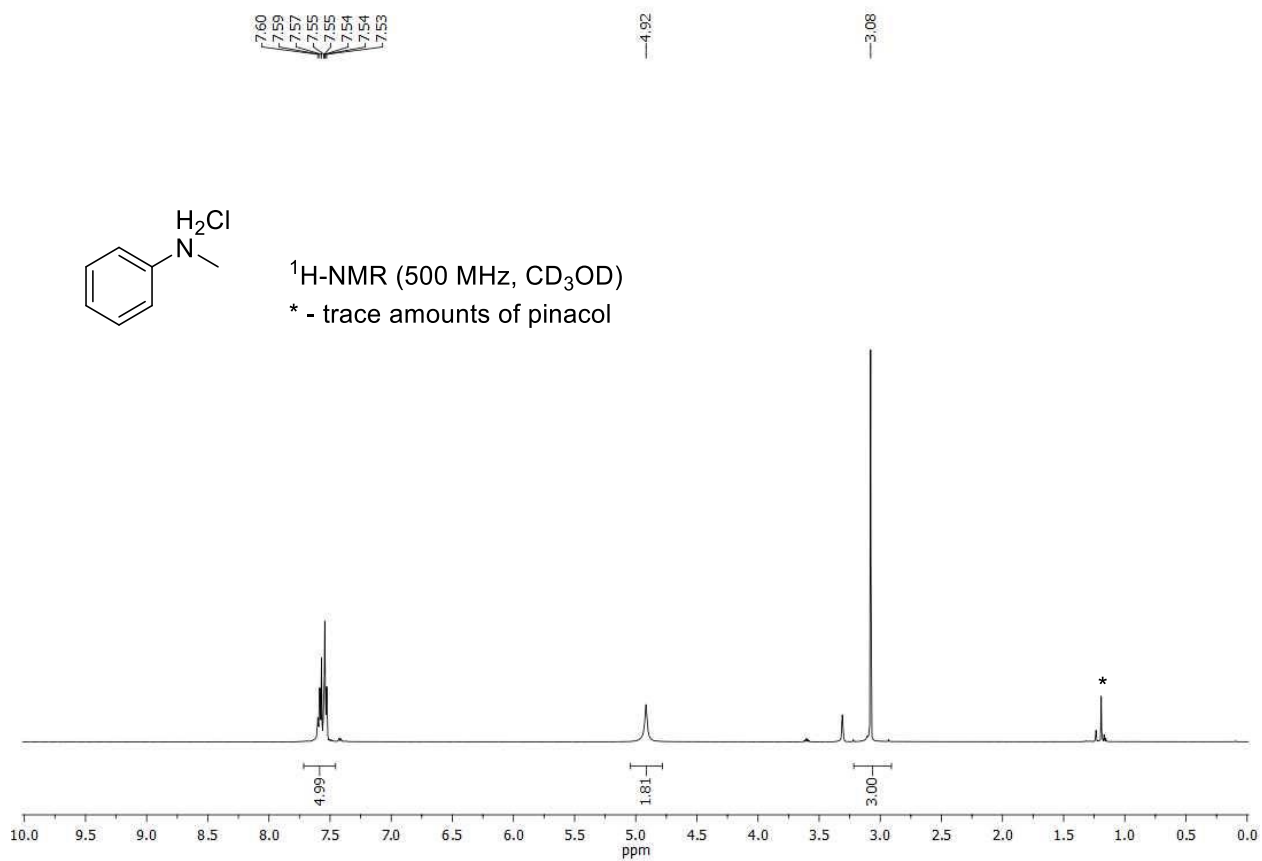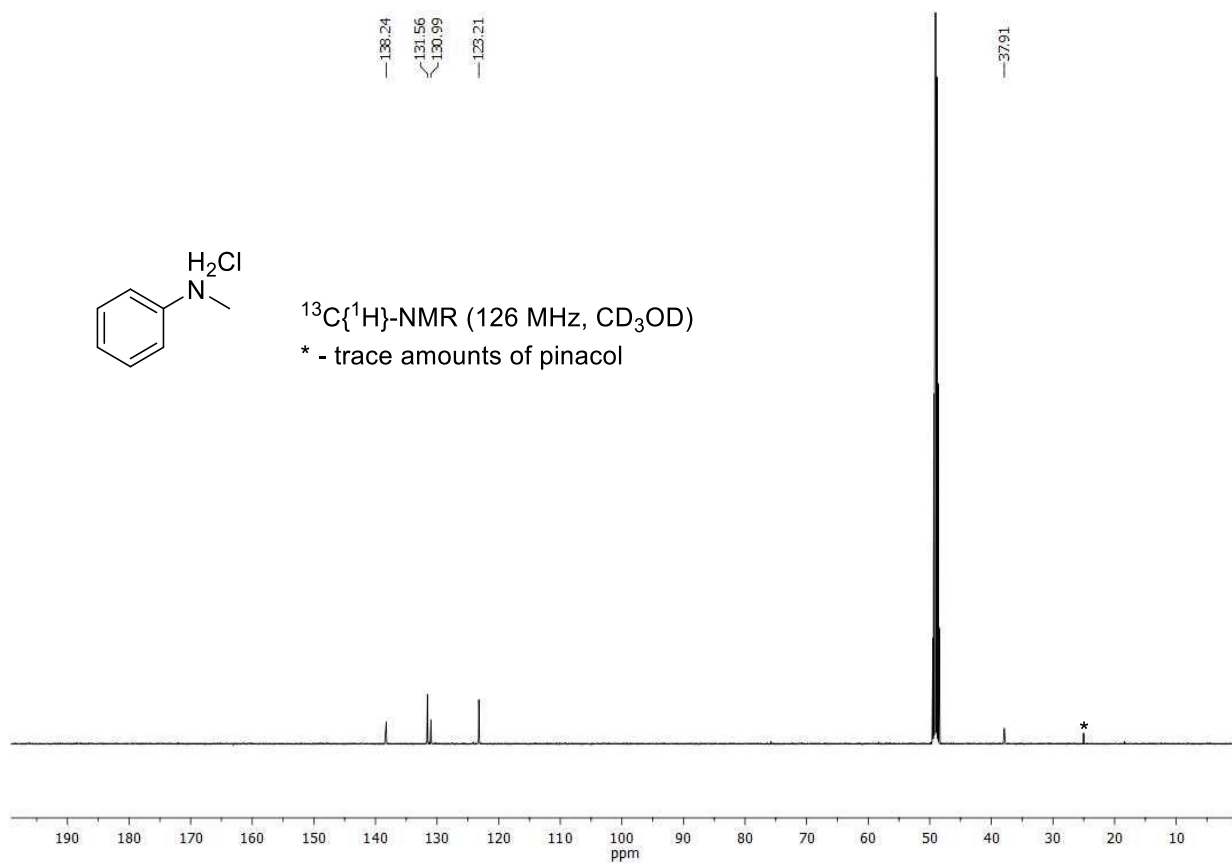

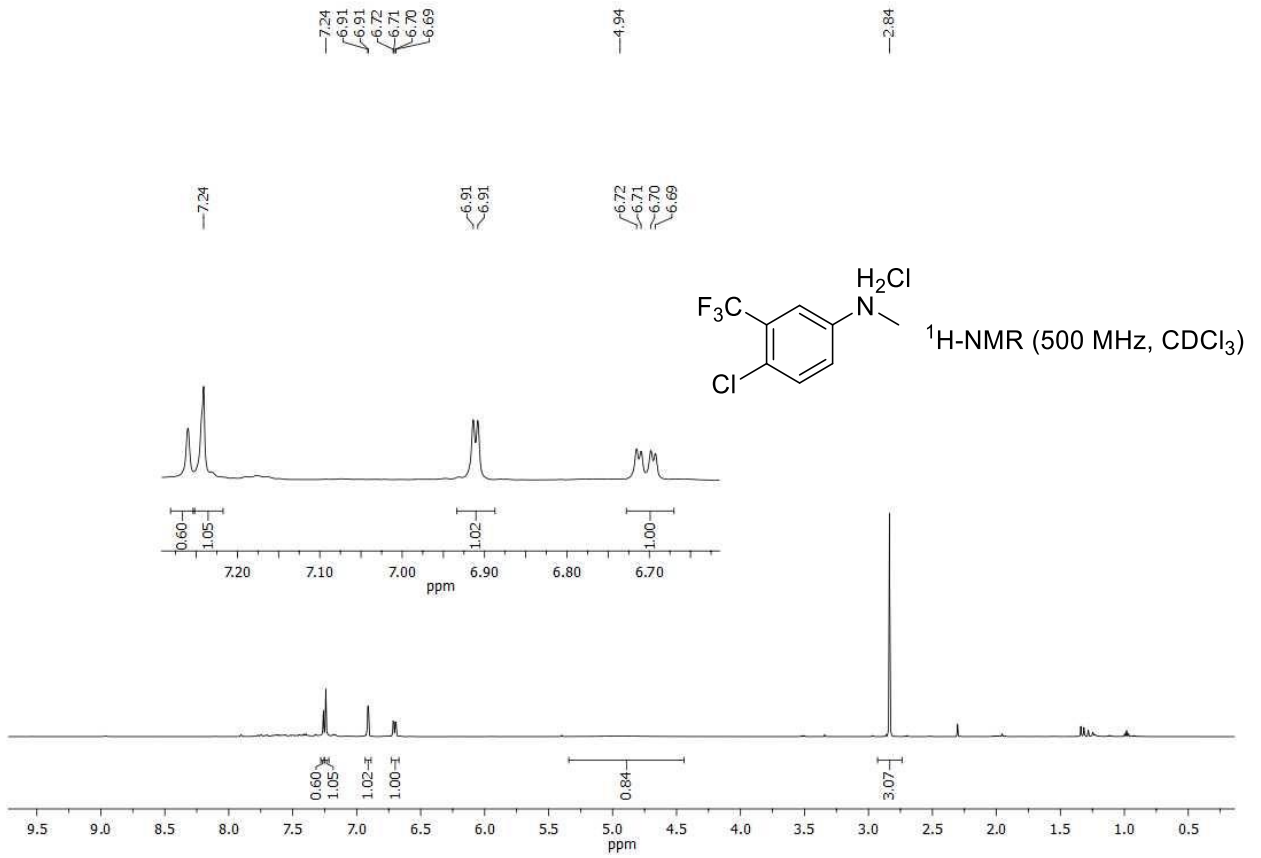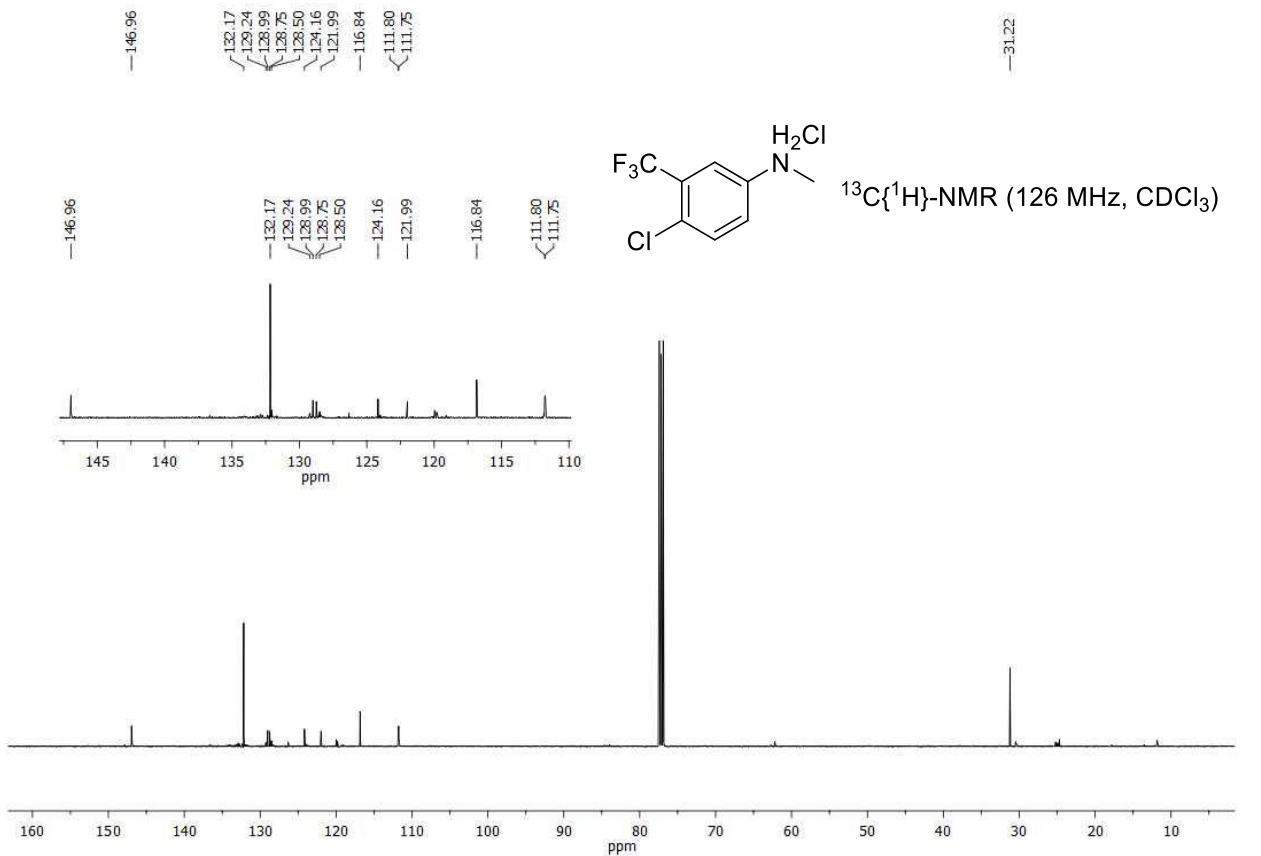

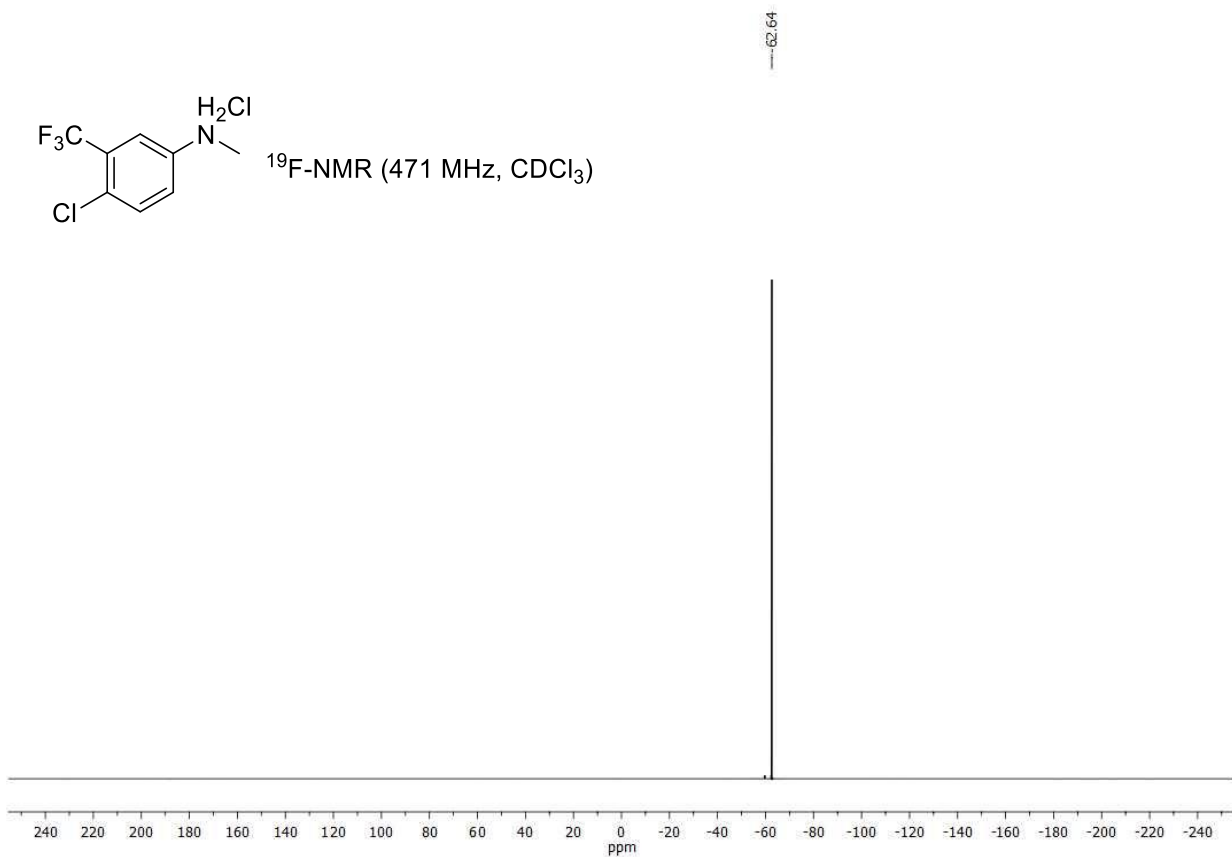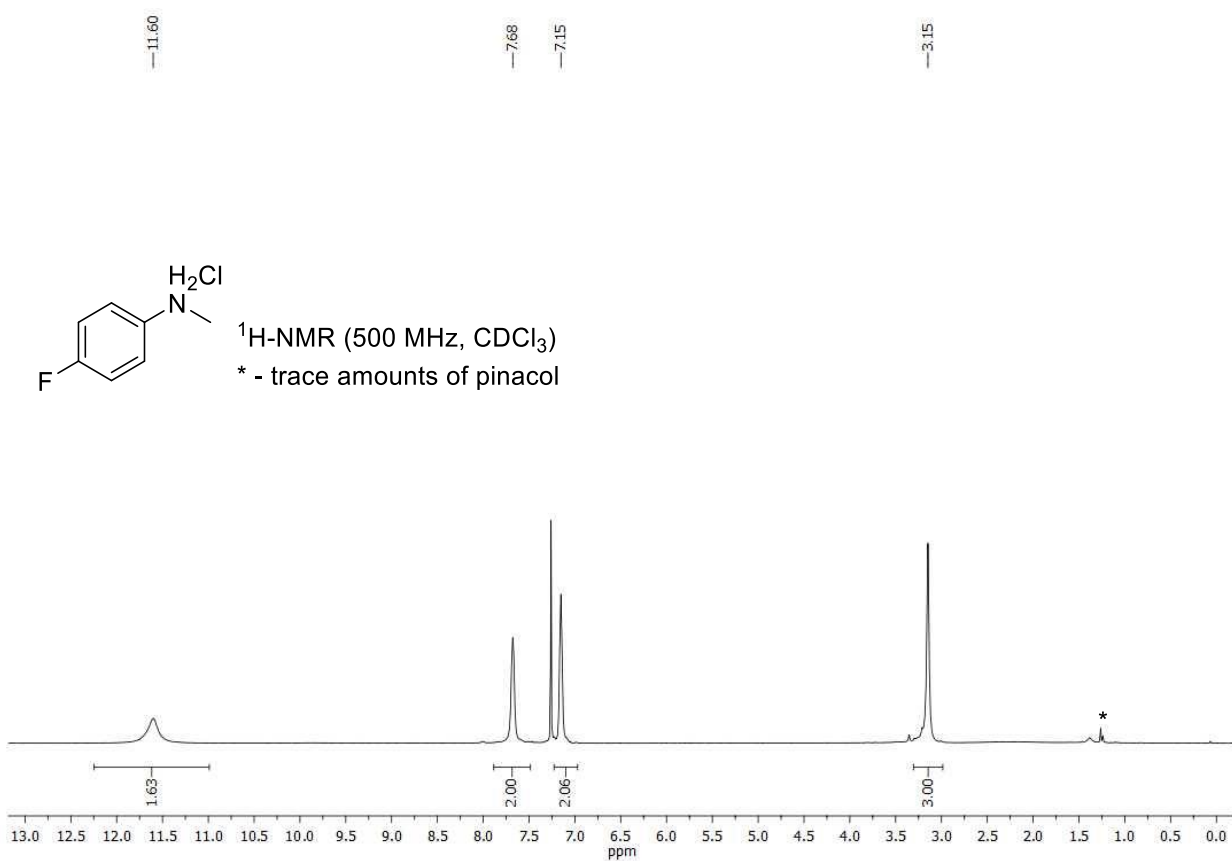

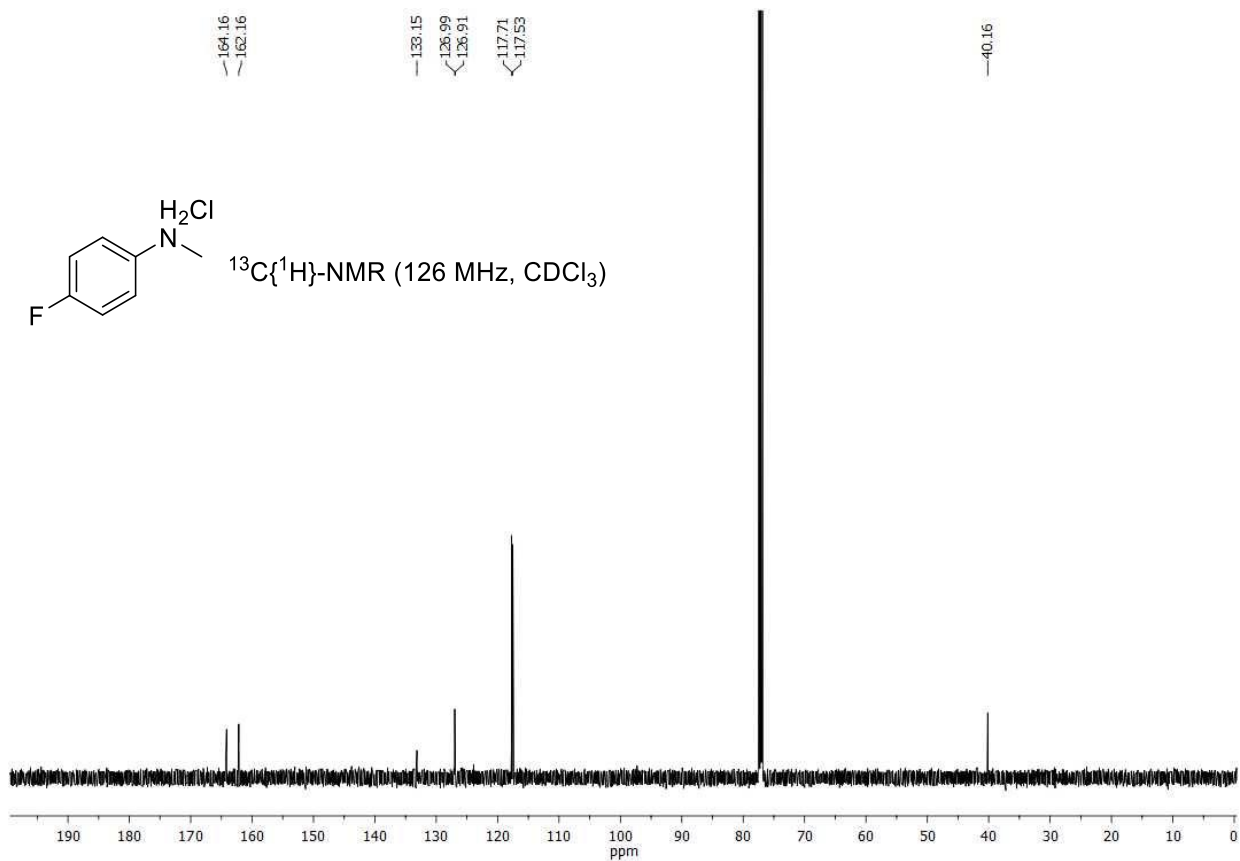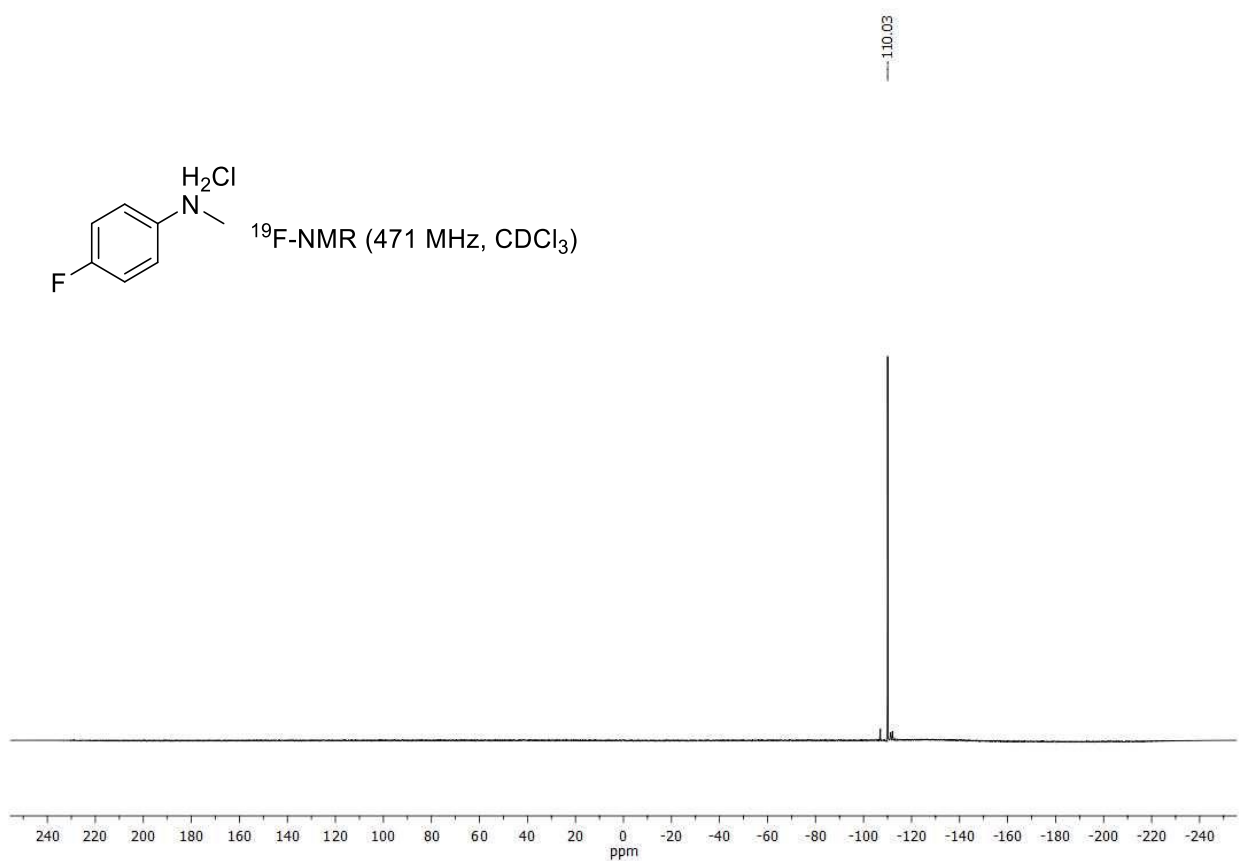



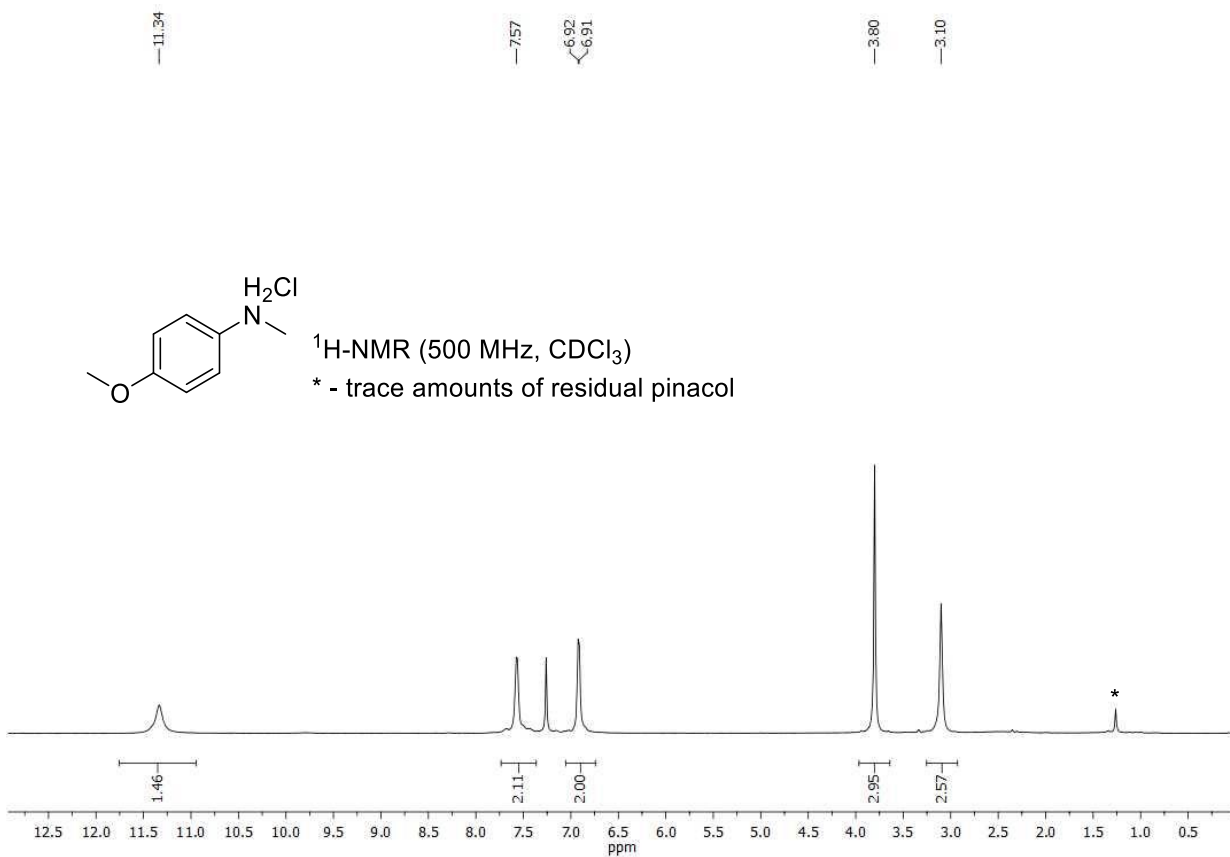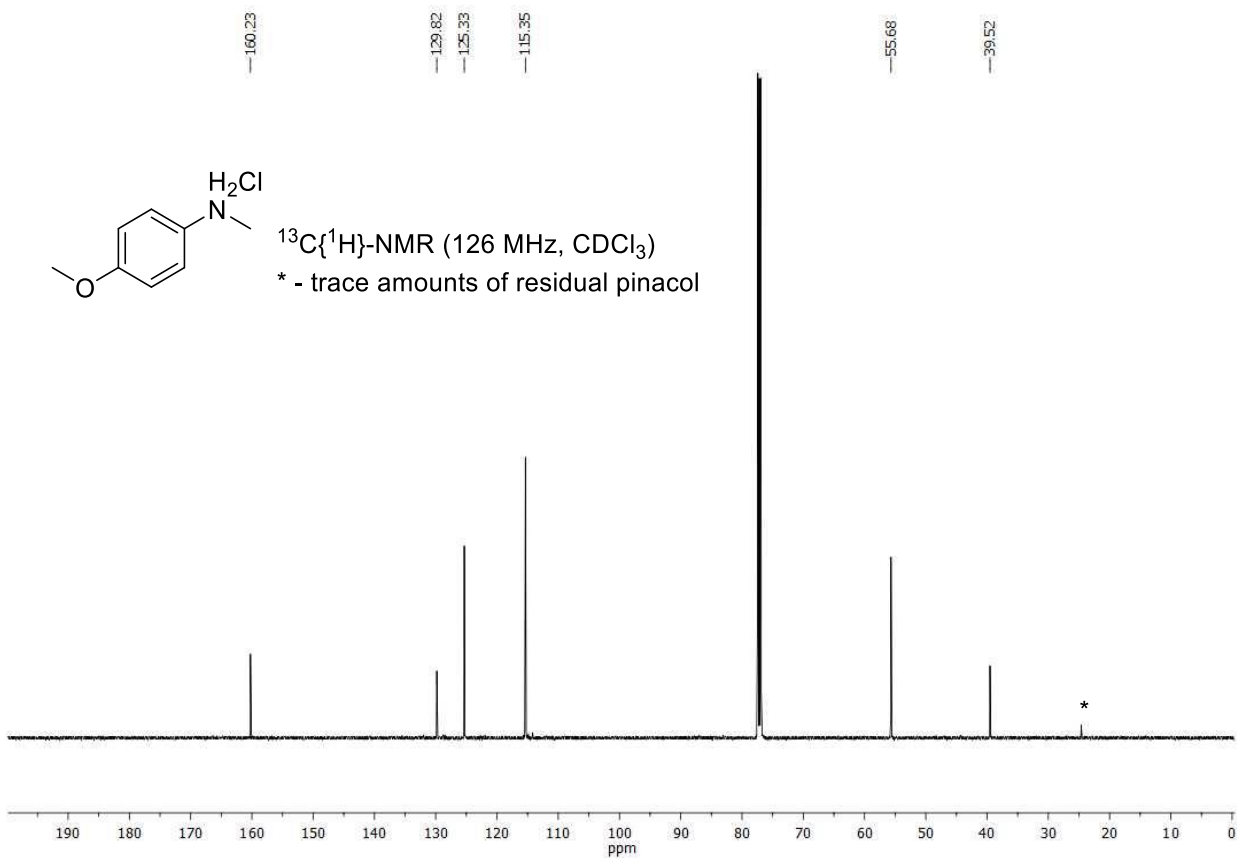



## 8. Computational details

All calculations were carried out with the Gaussian 09<sup>17</sup> and ORCA 4.2.1<sup>18</sup> suites of programs. Geometries were optimized using the meta-GGA functional M06-L<sup>19</sup> and the def2-SVP<sup>20</sup> basis set. Further single point calculations were performed on optimized geometries with a larger def2-TZVPP<sup>20</sup> basis set. For single point calculations the popular hybrid functional B3LYP<sup>21-24</sup> with D3BJ<sup>25,26</sup> correction (or B3LYP-D3) and the range-separated meta-GGA hybrid functional  $\omega$ B97M-V<sup>27</sup> with nonlocal correlation were chosen. The  $\omega$ B97M-V functional was applied to study both the catalyst-free and the catalyst-assisted reactions, while B3LYP-D3 was only used in the catalyst-free part. Recent systematic benchmark studies have shown that the  $\omega$ B97M-V functional is highly robust in the calculations of main-group chemistry and also demonstrates a good accuracy towards transition metal complexes<sup>28-30</sup>. The default "Tight" convergence criterion and "UltraFine" grid were used in the Gaussian software. The ORCA "TightSCF" convergence criterion and "Grid5" numerical integration settings was employed throughout. To accelerate DFT calculations for the M06-L functional the resolution of the identity<sup>31,32</sup> approximation was used with automatically generated density fitting sets. For the exchange part in hybrid functionals the RIJCOSX method<sup>33</sup> was applied together with def2/J<sup>34</sup> auxiliary basis sets. The nature of the stationary points was confirmed by analytical calculation of vibrational frequencies in the harmonic approximation. Solvation effects were taken into account employing the polarized continuum solvation model (PCM)<sup>35</sup>, the dielectric constants  $\epsilon = 2.3741$  for toluene and  $\epsilon = 2.48$  for HBpin<sup>36</sup> were used.

The domain based local pair natural orbital coupled-cluster DLPNO-CCSD(T1)<sup>37,38</sup> calculations were conducted to ensure the accuracy of DFT methods on selected structures in the catalyst-free part. DLPNO calculations were performed in combination with the def2-SVP and def2-TZVPP<sup>20</sup> basis sets as implemented in ORCA 4.2.1 software. Auxiliary "/C" basis sets with maximum possible angular momentum ("autoauxlmax true") were generated using the automated auxiliary basis set construction module of ORCA (the so-called "autoaux")<sup>39</sup>. The two-point extrapolation scheme for approaching the complete pair natural orbital space (CPS) limit was applied to reduce the local approximation error with the increasing system size<sup>40</sup>. Correlation energies obtained with two "TCutPNO" values ( $10^{-6}$  and  $10^{-7}$ ) for each basis set were extrapolated to the CPS limit, i.e. the CPS(6/7) scheme was used. A complete basis set (CBS) limit extrapolation was performed to minimize the basis set incompleteness and superposition errors, using the CBS(2/3) scheme described previously<sup>41</sup>.

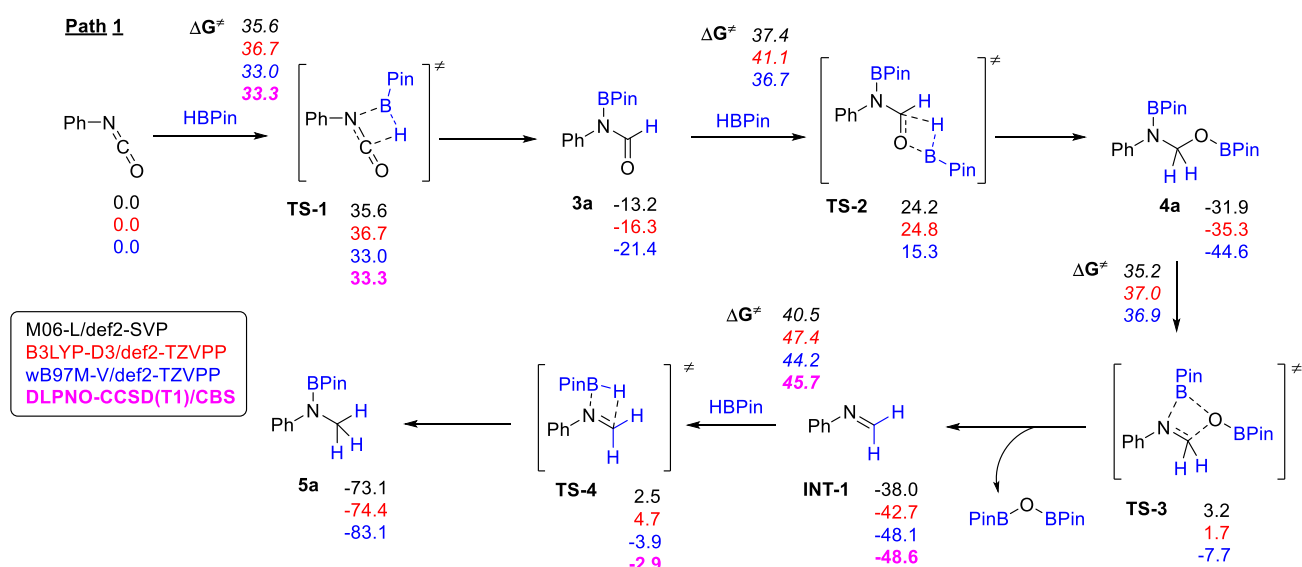

**Path 2** - Attack on the oxygen atom of PhNCO

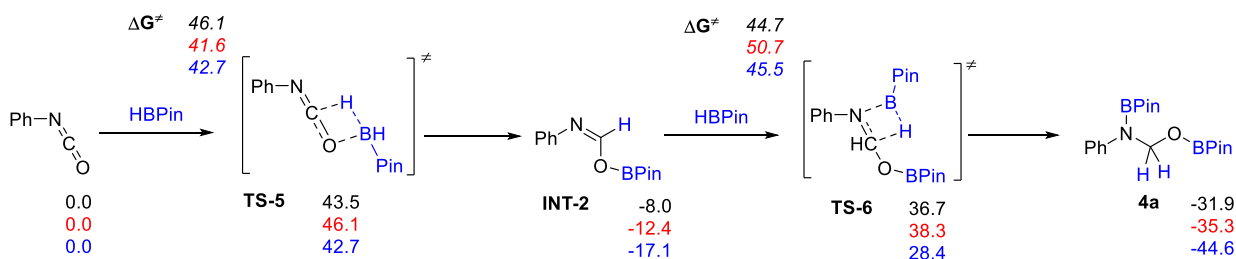

**Path 3** - HBpin as substrate, catalyst and solvent

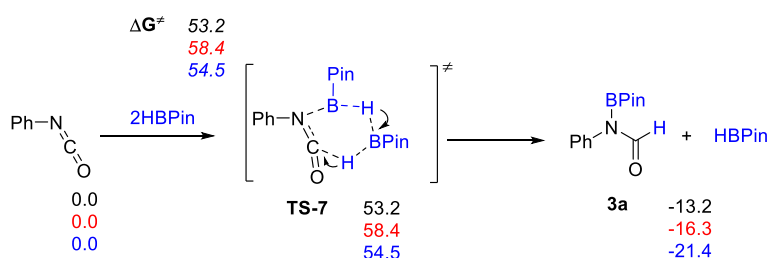

**Scheme S1.** DFT calculated pathways for catalyst-free hydroboration of PhNCO with HBPIn to N-borylformamide **3a** and borylated *N*-methylaniline **5a** (Gibbs free energies are shown in kcal·mol<sup>-1</sup>). Geometries were optimized using the M06L functional and the def2-SVP basis set. Additional single point calculations were performed on each optimized geometry with the aid of functionals B3LYP-D3 and  $\omega$ B97M-V and the def2-TZVPP basis set, which all showed very similar results. Additional high-level *ab initio* DLPNO-CCSD(T1)/CBS calculations on selected structures demonstrate a high accuracy of the  $\omega$ B97M-V/def2-TZVPP method. Solvation effects were taken into account employing the PCM model, the dielectric constant  $\epsilon = 2.48$  for HBpin was used.

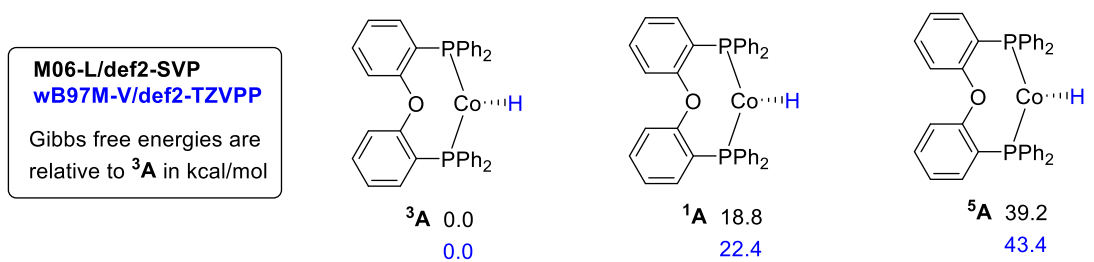

Relative Gibbs free energies of cobalt hydride complex in different electronic states

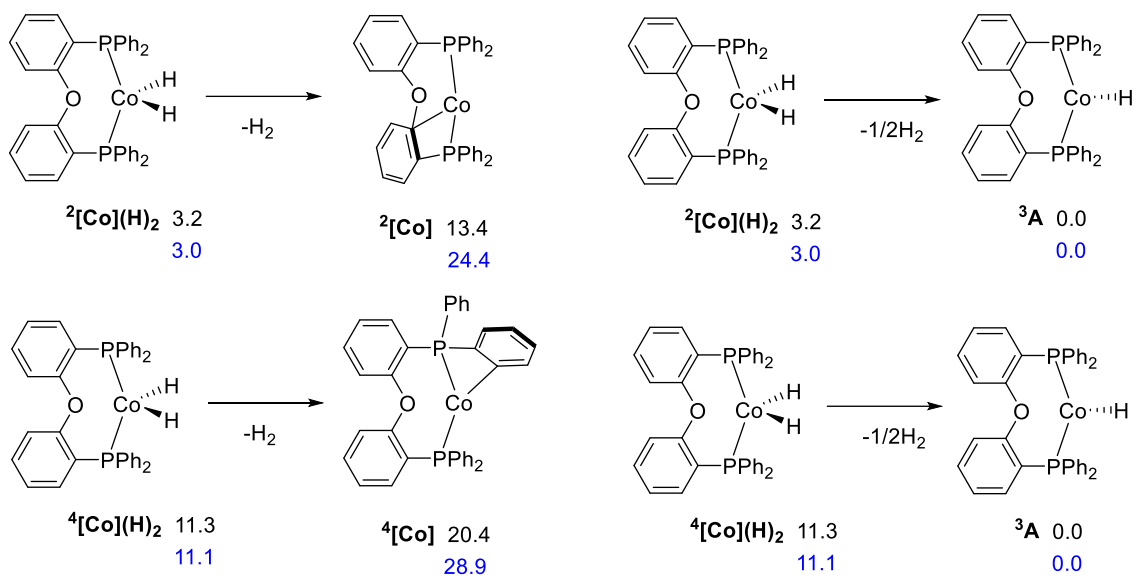

**Scheme S2.** DFT derived pathways for cobalt pre-catalyst activation (Gibbs free energies are shown in kcal·mol<sup>-1</sup> relative to  $\mathbf{A}$  in triplet state). Solvation effects were taken into account employing the PCM model, the dielectric constant  $\epsilon = 2.3741$  for toluene was used.

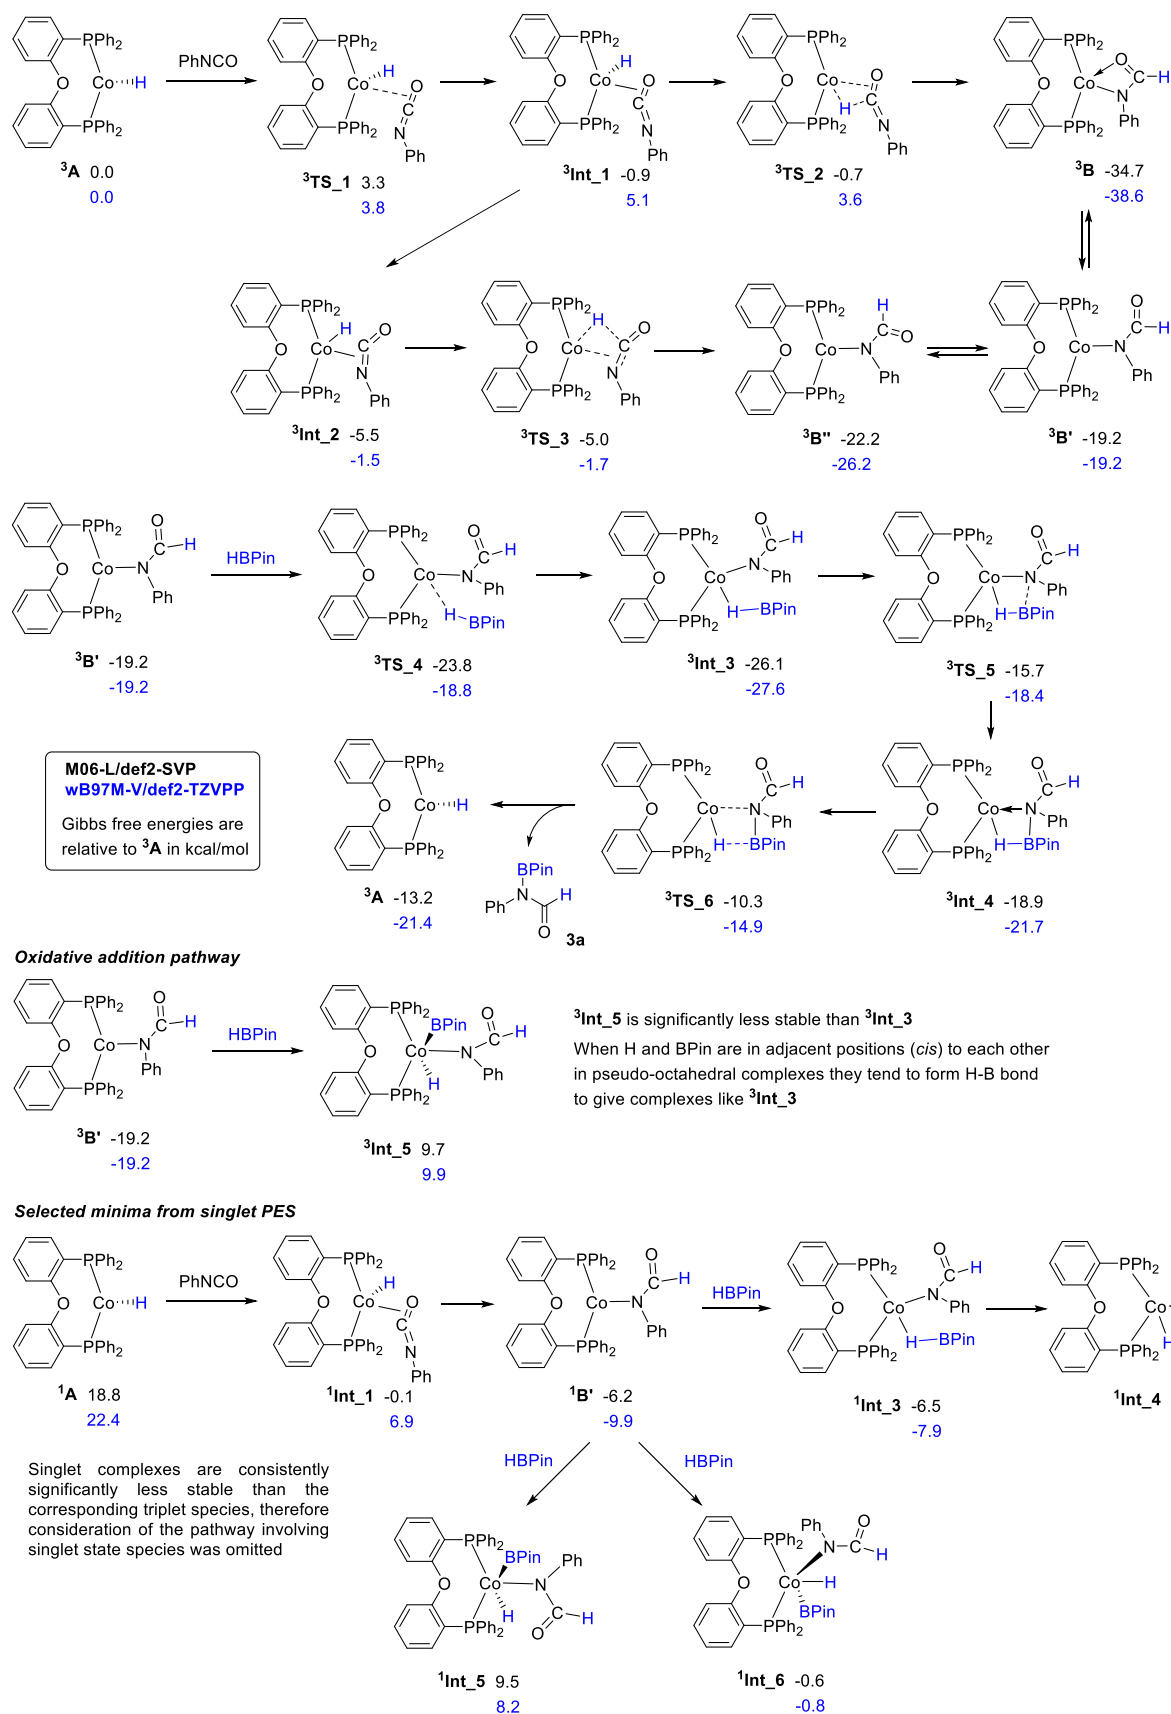

**Scheme S3.** DFT derived pathways for **A**-catalyzed monohydroboration of PhNCO with HBPIn to N-borylformamide **3a** (cycle 1 in Scheme 6 in the manuscript). Gibbs free energies are shown in kcal·mol<sup>-1</sup>. Solvation effects were taken into account employing the PCM model, the dielectric constant  $\epsilon = 2.3741$  for toluene was used.

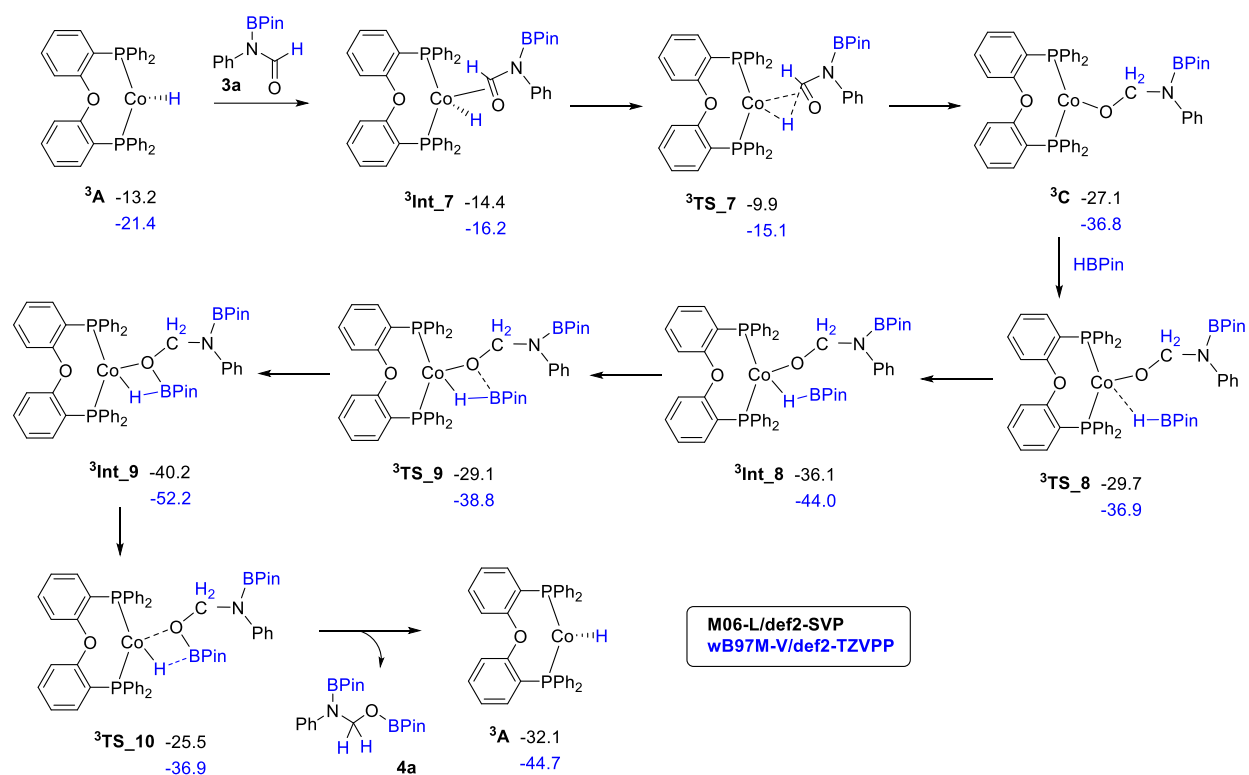

**Scheme S4.** DFT derived mechanism for **A**-catalyzed conversion of **3a** to **4a** (cycle 2 in Scheme 6 in the manuscript). Gibbs free energies are shown in kcal·mol<sup>-1</sup>. Solvation effects were taken into account employing the PCM model, the dielectric constant  $\epsilon = 2.3741$  for toluene was used.

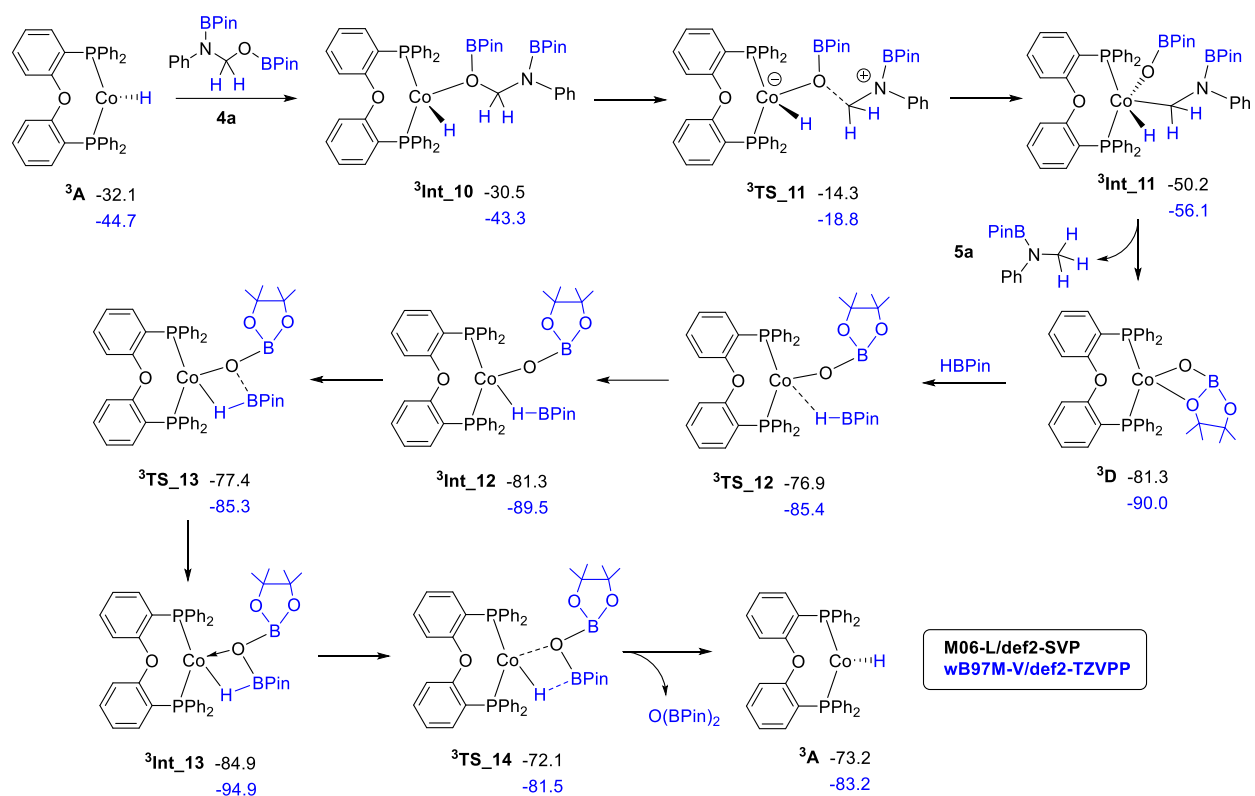

**Scheme S5.** DFT derived mechanism for **A**-catalyzed conversion of **4a** to **5a** via O-coordination of **4a** to **A** (cycle 3 in Scheme 6 in the manuscript). Gibbs free energies are shown in kcal·mol<sup>-1</sup>. Solvation effects were taken into account employing the PCM model, the dielectric constant  $\epsilon = 2.3741$  for toluene was used.  ${}^3\text{Int}_{11}$  was located separately, optimization from  ${}^3\text{TS}_{11}$  leads directly to  ${}^3\text{D}$ . No transition states for the reaction of **A** with **4a** to give Co-OBPin complex via either oxidative addition or metathesis routes could be localized.

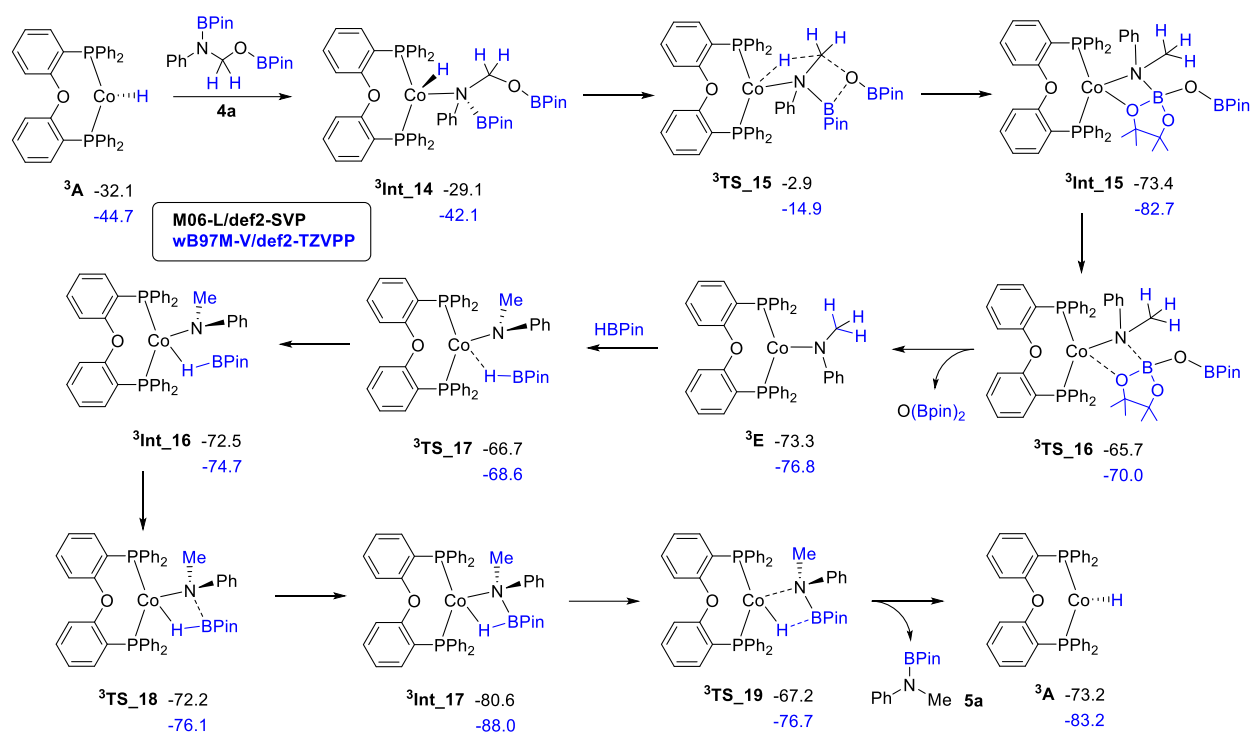

**Scheme S6.** DFT derived mechanism for **A**-catalyzed conversion of **4a** to **5a** via N-coordination of **4a** to **A** (cycle 4 in Scheme 6 in the manuscript). Gibbs free energies are shown in kcal·mol<sup>-1</sup>. Solvation effects were taken into account employing the PCM model, the dielectric constant  $\epsilon = 2.3741$  for toluene was used.

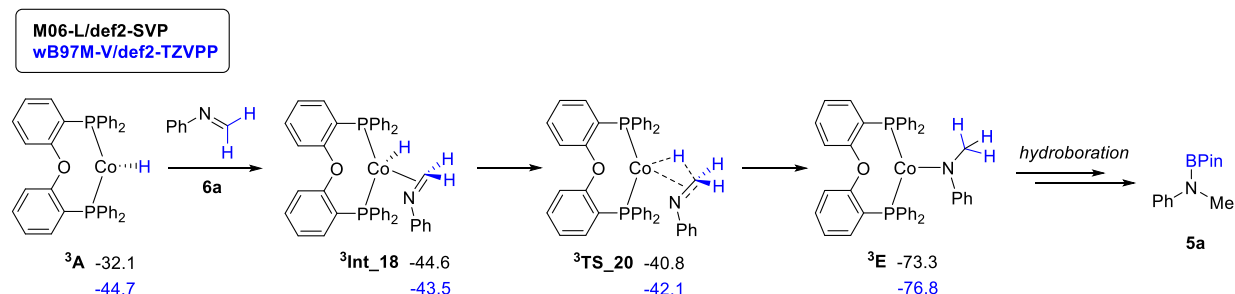

**Scheme S7.** DFT derived mechanism for **A**-catalyzed hydroboration of the imine **6a** to **5a**. Gibbs free energies are shown in kcal·mol<sup>-1</sup>. Solvation effects were taken into account employing the PCM model, the dielectric constant  $\epsilon = 2.3741$  for toluene was used. Starting from intermediate **E** the following steps in Scheme S7 are identical to those in Scheme S6 and therefore were omitted.

**Table S1.** Electronic energies ( $E$ ), thermal corrections to Gibbs free energy ( $G_{\text{corr}}$ ), solvation energies ( $\Delta G_{\text{solv}}^{\circ}$ ) and relative Gibbs free energies in solution ( $\Delta\Delta_f G_s^{\circ}$ ) for the catalyst-free reaction calculated using different functionals: M06-L – (1), B3LYP-D3 – (2) and  $\omega$ B97M-V – (3)

|                            | $E(1)$ , a.u. | $E(2)$ , a.u. | $E(3)$ , a.u. | $G_{\text{corr}}(1)$ , a.u. | $\Delta G_{\text{solv}}^{\circ}(1)$ , kcal·mol <sup>-1</sup> | $\Delta\Delta_f G_s^{\circ}(1)$ , kcal·mol <sup>-1</sup> | $\Delta\Delta_f G_s^{\circ}(2)$ , kcal·mol <sup>-1</sup> | $\Delta\Delta_f G_s^{\circ}(3)$ , kcal·mol <sup>-1</sup> |
|----------------------------|---------------|---------------|---------------|-----------------------------|--------------------------------------------------------------|----------------------------------------------------------|----------------------------------------------------------|----------------------------------------------------------|
| <b>HBpin</b>               | -411.51434    | -412.07283    | -411.85206    | 0.15740                     | -1.4                                                         | -                                                        | -                                                        | -                                                        |
| <b>(Bpin)<sub>2</sub>O</b> | -897.11472    | -898.31949    | -897.88334    | 0.32022                     | -3.0                                                         | -                                                        | -                                                        | -                                                        |
| <b>PhNCO</b>               | -399.40591    | -399.91716    | -399.74876    | 0.07176                     | -1.2                                                         | 0.0                                                      | 0.0                                                      | 0.0                                                      |
| <b>TS-1</b>                | -810.88456    | -811.95251    | -811.56925    | 0.24971                     | -2.3                                                         | 35.6                                                     | 36.7                                                     | 33.0                                                     |
| <b>3a</b>                  | -810.96467    | -812.03935    | -811.65829    | 0.25364                     | -3.3                                                         | -13.2                                                    | -16.3                                                    | -21.4                                                    |
| <b>TS-2</b>                | -1222.44318   | -1224.07052   | -1223.47575   | 0.43383                     | -4.0                                                         | 24.2                                                     | 24.8                                                     | 15.3                                                     |
| <b>4a</b>                  | -1222.53914   | -1224.17274   | -1223.57765   | 0.43873                     | -3.0                                                         | -31.9                                                    | -35.3                                                    | -44.6                                                    |
| <b>TS-3</b>                | -1222.48114   | -1224.11186   | -1223.51683   | 0.43642                     | -2.8                                                         | 3.2                                                      | 1.7                                                      | -7.7                                                     |
| <b>INT-1</b>               | -325.40444    | -325.83548    | -325.67025    | 0.09079                     | -1.2                                                         | -38.0                                                    | -42.7                                                    | -48.1                                                    |
| <b>TS-4</b>                | -736.87528    | -737.85374    | -737.47283    | 0.26897                     | -2.5                                                         | 2.5                                                      | 4.7                                                      | -3.9                                                     |
| <b>5a</b>                  | -737.00214    | -737.98608    | -737.60546    | 0.27393                     | -1.6                                                         | -73.1                                                    | -74.4                                                    | -83.1                                                    |
| <b>TS-5</b>                | -810.87043    | -811.93609    | -811.55231    | 0.24798                     | -2.1                                                         | 43.5                                                     | 46.1                                                     | 42.7                                                     |
| <b>INT-2</b>               | -810.95616    | -812.03287    | -811.65120    | 0.25292                     | -3.0                                                         | -8.0                                                     | -12.4                                                    | -17.1                                                    |
| <b>TS-6</b>                | -1222.42053   | -1224.04630   | -1223.45209   | 0.43114                     | -4.1                                                         | 36.7                                                     | 38.3                                                     | 28.4                                                     |
| <b>TS-7</b>                | -1222.39480   | -1224.01487   | -1223.41112   | 0.42983                     | -2.9                                                         | 53.2                                                     | 58.4                                                     | 54.5                                                     |

**Table S2.** Hartree-Fock energies ( $E_{\text{HF}}$ ), CCSD(T1) correlation energies ( $E_{\text{C-CCSD(T1)}}$ ) for different TCutPNO values and CPS(6/7) extrapolated correlation energies and total energies ( $E_{\text{CCSD(T1)}}$ ) at the complete basis set limit for selected structures in the catalyst-free reaction

| <b>CBS(2/3)</b>            |                 | TCutPNO=10 <sup>-6</sup> | TCutPNO=10 <sup>-7</sup> | CPS(6/7)                | CPS(6/7)              |
|----------------------------|-----------------|--------------------------|--------------------------|-------------------------|-----------------------|
|                            | $E_{\text{HF}}$ | $E_{\text{C-CCSD(T1)}}$  | $E_{\text{C-CCSD(T1)}}$  | $E_{\text{C-CCSD(T1)}}$ | $E_{\text{CCSD(T1)}}$ |
| <b>HBpin</b>               | -409.59384      | -1.86690                 | -1.86880                 | -1.86975                | -411.46359            |
| <b>(Bpin)<sub>2</sub>O</b> | -893.07782      | -3.96460                 | -3.96975                 | -3.97233                | -897.05015            |
| <b>PhNCO</b>               | -397.59646      | -1.73644                 | -1.73730                 | -1.73773                | -399.33419            |
| <b>TS-1</b>                | -807.12758      | -3.63208                 | -3.63619                 | -3.63825                | -810.76583            |
| <b>INT-1</b>               | -323.80422      | -1.50739                 | -1.50809                 | -1.50844                | -325.31266            |
| <b>TS-4</b>                | -733.31011      | -3.40838                 | -3.41237                 | -3.41436                | -736.72447            |



**Table S3.** Electronic energies ( $E$ ), thermal corrections to Gibbs free energy ( $G_{\text{corr}}$ ), solvation energies ( $\Delta G_{\text{solv}}^\circ$ ) and relative Gibbs free energies in solution ( $\Delta\Delta_f G_s^\circ$ ) for the catalyst-assisted reaction calculated using two functionals: M06-L – (1) and  $\omega$ B97M-V – (3)

|                                   | $E(1)$ , a.u. | $E(3)$ , a.u. | $G_{\text{corr}}(1)$ , a.u. | $\Delta G_{\text{solv}}^\circ(1)$ , kcal·mol <sup>-1</sup> | $\Delta\Delta_f G_s^\circ(1)$ , kcal·mol <sup>-1</sup> | $\Delta\Delta_f G_s^\circ(3)$ , kcal·mol <sup>-1</sup> |
|-----------------------------------|---------------|---------------|-----------------------------|------------------------------------------------------------|--------------------------------------------------------|--------------------------------------------------------|
| <sup>3</sup> A                    | -3528.35176   | -3529.92385   | 0.46940                     | -4.6                                                       | 0.0                                                    | 0.0                                                    |
| <sup>1</sup> A                    | -3528.32468   | -3529.89116   | 0.47073                     | -3.6                                                       | 18.8                                                   | 22.4                                                   |
| <sup>5</sup> A                    | -3528.28669   | -3529.85216   | 0.46580                     | -4.0                                                       | 39.2                                                   | 43.4                                                   |
| <sup>2</sup> [Co](H) <sub>2</sub> | -3528.93819   | -3530.50771   | 0.47511                     | -3.7                                                       | 3.2                                                    | 3.0                                                    |
| <sup>4</sup> [Co](H) <sub>2</sub> | -3528.92226   | -3530.49172   | 0.47393                     | -4.9                                                       | 11.3                                                   | 11.1                                                   |
| <sup>2</sup> [Co]                 | -3527.73943   | -3529.29684   | 0.46070                     | -3.3                                                       | 13.4                                                   | 24.4                                                   |
| <sup>4</sup> [Co]                 | -3527.72874   | -3529.29021   | 0.46087                     | -3.2                                                       | 20.4                                                   | 28.9                                                   |
| H <sub>2</sub>                    | -1.16721      | -1.16137      | -0.00148                    | -0.04                                                      | -                                                      | -                                                      |
| <sup>3</sup> TS_1                 | -3927.77346   | -3929.68765   | 0.56087                     | -5.0                                                       | 3.3                                                    | 3.8                                                    |
| <sup>3</sup> Int_1                | -3927.78044   | -3929.68586   | 0.56207                     | -5.5                                                       | -0.9                                                   | 5.1                                                    |
| <sup>3</sup> TS_2                 | -3927.77993   | -3929.68813   | 0.56210                     | -5.6                                                       | -0.7                                                   | 3.6                                                    |
| <sup>3</sup> Int_2                | -3927.78997   | -3929.69865   | 0.56307                     | -4.8                                                       | -5.5                                                   | -1.5                                                   |
| <sup>3</sup> TS_3                 | -3927.78994   | -3929.69958   | 0.56374                     | -4.7                                                       | -5.0                                                   | -1.7                                                   |
| <sup>3</sup> B                    | -3927.84337   | -3929.76444   | 0.56887                     | -4.1                                                       | -34.7                                                  | -38.6                                                  |
| <sup>3</sup> B''                  | -3927.81660   | -3929.73837   | 0.56638                     | -6.6                                                       | -22.0                                                  | -26.2                                                  |
| <sup>3</sup> B'                   | -3927.82239   | -3929.73736   | 0.56983                     | -2.4                                                       | -19.2                                                  | -19.2                                                  |
| <sup>3</sup> TS_4                 | -4339.36635   | -4341.61112   | 0.75048                     | -4.3                                                       | -23.8                                                  | -18.8                                                  |
| <sup>3</sup> Int_3                | -4339.36691   | -4341.62197   | 0.74797                     | -4.7                                                       | -26.1                                                  | -27.6                                                  |
| <sup>3</sup> TS_5                 | -4339.35741   | -4341.61441   | 0.75410                     | -4.1                                                       | -15.7                                                  | -18.4                                                  |
| <sup>3</sup> Int_4                | -4339.35904   | -4341.61621   | 0.75051                     | -4.0                                                       | -18.9                                                  | -21.7                                                  |
| <sup>3</sup> TS_6                 | -4339.34401   | -4341.60407   | 0.74956                     | -4.3                                                       | -10.3                                                  | -14.9                                                  |
| <sup>3</sup> A                    | -3528.35176   | -3529.92385   | 0.46940                     | -4.6                                                       | -13.2                                                  | -21.4                                                  |
| <sup>3</sup> Int_5                | -4339.31198   | -4341.56422   | 0.74964                     | -4.4                                                       | 9.7                                                    | 9.9                                                    |
| <sup>1</sup> Int_1                | -3927.78980   | -3929.69369   | 0.57300                     | -5.7                                                       | -0.1                                                   | 6.9                                                    |
| <sup>1</sup> B'                   | -3927.80135   | -3929.72225   | 0.57235                     | -4.1                                                       | -6.2                                                   | -9.9                                                   |
| <sup>1</sup> Int_4                | -4339.31497   | -4341.57667   | 0.75205                     | -3.7                                                       | 10.0                                                   | 4.4                                                    |
| <sup>1</sup> Int_3                | -4339.34567   | -4341.60071   | 0.75706                     | -4.1                                                       | -6.5                                                   | -7.9                                                   |
| <sup>1</sup> Int_5                | -4339.31720   | -4341.57200   | 0.75478                     | -4.5                                                       | 9.5                                                    | 8.2                                                    |
| <sup>1</sup> Int_6                | -4339.33251   | -4341.58551   | 0.75589                     | -5.7                                                       | -0.6                                                   | -0.8                                                   |
| <sup>3</sup> Int_7                | -4339.35125   | -4341.60685   | 0.75032                     | -4.3                                                       | -14.4                                                  | -16.2                                                  |
| <sup>3</sup> TS_7                 | -4339.34254   | -4341.60357   | 0.74917                     | -4.5                                                       | -9.9                                                   | -15.1                                                  |
| <sup>3</sup> C                    | -4339.37030   | -4341.63844   | 0.75086                     | -5.4                                                       | -27.1                                                  | -36.8                                                  |
| <sup>3</sup> TS_8                 | -4750.91985   | -4753.52175   | 0.93611                     | -4.7                                                       | -29.7                                                  | -36.9                                                  |

|                     |             |             |         |      |       |       |
|---------------------|-------------|-------------|---------|------|-------|-------|
| <sup>3</sup> Int_8  | -4750.92447 | -4753.52748 | 0.93082 | -4.9 | -36.1 | -44.0 |
| <sup>3</sup> TS_9   | -4750.91598 | -4753.52181 | 0.93296 | -4.6 | -29.1 | -38.8 |
| <sup>3</sup> Int_9  | -4750.93723 | -4753.54663 | 0.93687 | -4.8 | -40.2 | -52.2 |
| <sup>3</sup> TS_10  | -4750.90476 | -4753.51332 | 0.92928 | -5.6 | -25.5 | -36.9 |
| <sup>3</sup> A      | -3528.35176 | -3529.92385 | 0.46940 | -4.6 | -32.1 | -44.7 |
| <sup>3</sup> Int_10 | -4750.91957 | -4753.53034 | 0.93598 | -5.6 | -30.5 | -43.3 |
| <sup>3</sup> TS_11  | -4750.88847 | -4753.48603 | 0.93088 | -5.7 | -14.3 | -18.8 |
| <sup>3</sup> Int_11 | -4750.95315 | -4753.55292 | 0.93589 | -4.2 | -50.2 | -56.1 |
| <sup>3</sup> D      | -4013.96929 | -4015.97028 | 0.63492 | -5.2 | -81.3 | -90.0 |
| <sup>3</sup> TS_12  | -4425.50564 | -4427.84393 | 0.81789 | -4.4 | -76.9 | -85.4 |
| <sup>3</sup> Int_12 | -4425.51212 | -4427.85001 | 0.81687 | -4.1 | -81.3 | -89.5 |
| <sup>3</sup> TS_13  | -4425.50761 | -4427.84496 | 0.81850 | -4.0 | -77.4 | -85.3 |
| <sup>3</sup> Int_13 | -4425.51638 | -4427.85720 | 0.81647 | -4.7 | -84.9 | -94.9 |
| <sup>3</sup> TS_14  | -4425.49462 | -4427.83436 | 0.81505 | -4.7 | -72.1 | -81.5 |
| <sup>3</sup> A      | -3528.35176 | -3529.92385 | 0.46940 | -4.6 | -73.2 | -83.2 |
| <sup>3</sup> Int_14 | -4750.91519 | -4753.52641 | 0.93338 | -5.3 | -29.1 | -42.1 |
| <sup>3</sup> TS_15  | -4750.87042 | -4753.48011 | 0.92950 | -4.7 | -2.9  | -14.9 |
| <sup>3</sup> Int_15 | -4750.99121 | -4753.59639 | 0.93978 | -5.9 | -73.4 | -82.7 |
| <sup>3</sup> TS_16  | -4750.97533 | -4753.57257 | 0.93530 | -5.4 | -65.7 | -70.0 |
| <sup>3</sup> E      | -3853.84209 | -3855.66949 | 0.58612 | -3.5 | -73.3 | -76.8 |
| <sup>3</sup> TS_17  | -4265.37429 | -4267.53677 | 0.77041 | -4.0 | -66.7 | -68.6 |
| <sup>3</sup> Int_16 | -4265.38352 | -4267.54662 | 0.77072 | -4.1 | -72.5 | -74.7 |
| <sup>3</sup> TS_18  | -4265.38074 | -4267.54635 | 0.76849 | -4.3 | -72.2 | -76.1 |
| <sup>3</sup> Int_17 | -4265.39704 | -4267.56836 | 0.77120 | -4.1 | -80.6 | -88.0 |
| <sup>3</sup> TS_19  | -4265.37577 | -4267.55050 | 0.77057 | -3.6 | -67.2 | -76.7 |
| <sup>3</sup> A      | -3528.35176 | -3529.92385 | 0.46940 | -4.6 | -73.2 | -83.2 |
| <sup>3</sup> Int_18 | -3853.79568 | -3855.61574 | 0.58634 | -4.1 | -44.6 | -43.5 |
| <sup>3</sup> TS_20  | -3853.78837 | -3855.61231 | 0.58437 | -3.6 | -40.8 | -42.1 |

**Table S4.** Cartesian coordinates (in Å) and M06-L/def2-SVP electronic energies (in a.u.) of all optimized geometries

|                                    |           |           |                                                  |   |           |           |           |
|------------------------------------|-----------|-----------|--------------------------------------------------|---|-----------|-----------|-----------|
| <b>HBpin</b> , -411.51434, NImag=0 |           |           | <b>(Bpin)<sub>2</sub>O</b> , -897.11472, NImag=0 |   |           |           |           |
| C                                  | -0.781325 | -0.188248 | 0.051880                                         | C | -2.959415 | 0.665625  | -0.558135 |
| C                                  | 0.781343  | -0.188202 | -0.051901                                        | C | -3.423150 | -0.415548 | 0.479393  |
| C                                  | -1.462165 | -0.448038 | -1.282173                                        | C | -3.346480 | 0.310524  | -1.985107 |
| O                                  | -1.067188 | 1.189688  | 0.404522                                         | O | -1.520486 | 0.572671  | -0.472879 |
| C                                  | -1.345169 | -1.095616 | 1.123107                                         | C | -3.382619 | 2.080442  | -0.228090 |
| O                                  | 1.067132  | 1.189790  | -0.404368                                        | O | -2.338731 | -1.367579 | 0.436019  |
| C                                  | 1.345272  | -1.095411 | -1.123224                                        | C | -4.713188 | -1.121010 | 0.122311  |
| C                                  | 1.462144  | -0.448120 | 1.282136                                         | C | -3.484445 | 0.125859  | 1.899278  |
| H                                  | 0.987863  | -0.822099 | -2.122992                                        | H | -4.636906 | -1.654106 | -0.832691 |
| H                                  | 1.072479  | -2.143685 | -0.932714                                        | H | -5.546142 | -0.405916 | 0.055614  |
| H                                  | 2.441383  | -1.032141 | -1.133926                                        | H | -4.966790 | -1.859141 | 0.894723  |
| H                                  | 1.054445  | 0.195266  | 2.073963                                         | H | -2.562207 | 0.661574  | 2.164045  |
| H                                  | 2.534109  | -0.228512 | 1.193337                                         | H | -3.598799 | -0.710061 | 2.601838  |
| H                                  | 1.354322  | -1.494222 | 1.600493                                         | H | -4.332243 | 0.809973  | 2.042915  |
| H                                  | -1.072329 | -2.143850 | 0.932456                                         | H | -4.478609 | 2.162970  | -0.187306 |
| H                                  | -2.441283 | -1.032417 | 1.133860                                         | H | -3.023576 | 2.772969  | -1.000979 |
| H                                  | -0.987735 | -0.822391 | 2.122889                                         | H | -2.973332 | 2.415771  | 0.732063  |
| H                                  | -1.054455 | 0.195399  | -2.073954                                        | H | -3.062625 | -0.721722 | -2.233086 |
| H                                  | -2.534121 | -0.228396 | -1.193330                                        | H | -2.821562 | 0.977867  | -2.681317 |
| H                                  | -1.354396 | -1.494113 | -1.600632                                        | H | -4.426143 | 0.420028  | -2.157722 |
| B                                  | -0.000060 | 1.934237  | 0.000072                                         | B | -1.235951 | -0.683867 | -0.003282 |
| H                                  | -0.000129 | 3.125958  | 0.000018                                         | O | -0.000013 | -1.240596 | -0.000473 |
| <b>PhNCO</b> , -399.40591, NImag=0 |           |           | <b>3a</b> , -810.96467, NImag=0                  |   |           |           |           |
| C                                  | 0.000000  | 0.254311  | 0.000000                                         | C | -2.653248 | 0.174390  | -0.203186 |
| C                                  | -1.247955 | 0.890660  | 0.000000                                         | C | -1.981376 | -1.116937 | 0.373591  |
| C                                  | 0.065987  | -1.147455 | 0.000000                                         | C | -2.962149 | 0.064351  | -1.687468 |
| C                                  | -2.413871 | 0.130888  | 0.000000                                         | O | -1.598974 | 1.158781  | -0.064945 |
| C                                  | -1.107282 | -1.894996 | 0.000000                                         | C | -3.867309 | 0.651863  | 0.561955  |
| C                                  | -2.350910 | -1.262410 | 0.000000                                         | O | -0.581161 | -0.889439 | 0.071549  |
| H                                  | -1.283452 | 1.981188  | 0.000000                                         | C | -2.419963 | -2.407777 | -0.281141 |
| H                                  | 1.040805  | -1.640245 | 0.000000                                         | C | -2.097418 | -1.214280 | 1.885866  |
| H                                  | -3.382703 | 0.635256  | 0.000000                                         | H | -2.198282 | -2.420160 | -1.354807 |
| H                                  | -1.047003 | -2.985700 | 0.000000                                         | H | -3.500391 | -2.564257 | -0.149301 |
| H                                  | -3.268066 | -1.854668 | 0.000000                                         | H | -1.900645 | -3.260351 | 0.176103  |
| N                                  | 1.145665  | 1.034059  | 0.000000                                         | H | -1.797816 | -0.276101 | 2.373033  |
| C                                  | 2.350313  | 0.999540  | 0.000000                                         | H | -1.434815 | -2.009017 | 2.252683  |
| O                                  | 3.517885  | 1.100316  | 0.000000                                         | H | -3.122353 | -1.451974 | 2.202166  |
| <b>TS-1</b> , -810.88456, NImag=1  |           |           | <b>3a</b> , -810.96467, NImag=0                  |   |           |           |           |
| C                                  | 1.014679  | -0.130118 | 0.216113                                         | C | -2.653248 | 0.174390  | -0.203186 |
| C                                  | -0.243975 | -0.401287 | 0.759380                                         | C | -1.981376 | -1.116937 | 0.373591  |
| C                                  | 1.751877  | -1.129580 | -0.423087                                        | C | -2.962149 | 0.064351  | -1.687468 |
| C                                  | -0.765969 | -1.687394 | 0.650147                                         | O | -1.598974 | 1.158781  | -0.064945 |
| C                                  | 1.218999  | -2.412896 | -0.517915                                        | C | -3.867309 | 0.651863  | 0.561955  |
| C                                  | -0.039552 | -2.694116 | 0.013523                                         | O | -0.581161 | -0.889439 | 0.071549  |
| H                                  | -0.777781 | 0.402097  | 1.270816                                         | C | -2.419963 | -2.407777 | -0.281141 |
| H                                  | 2.732327  | -0.900899 | -0.847539                                        | C | -2.097418 | -1.214280 | 1.885866  |
| H                                  | -1.748297 | -1.905813 | 1.074555                                         | H | -2.198282 | -2.420160 | -1.354807 |
| H                                  | 1.792063  | -3.197114 | -1.017039                                        | H | -3.500391 | -2.564257 | -0.149301 |
| H                                  | -0.453678 | -3.701197 | -0.066545                                        | H | -1.900645 | -3.260351 | 0.176103  |
| N                                  | 1.503080  | 1.198847  | 0.332531                                         | H | -1.797816 | -0.276101 | 2.373033  |
| C                                  | 2.707121  | 1.567312  | 0.468403                                         | H | -1.434815 | -2.009017 | 2.252683  |
| O                                  | 3.865383  | 1.595262  | 0.571109                                         | H | -3.122353 | -1.451974 | 2.202166  |
| C                                  | -1.101771 | 3.776047  | 0.628488                                         | H | -4.659182 | -0.111228 | 0.554572  |
| C                                  | -0.924024 | 3.479998  | -0.902193                                        | H | -4.271675 | 1.560827  | 0.098060  |
| C                                  | -0.713939 | 5.203871  | 0.989606                                         | H | -3.625687 | 0.891915  | 1.603813  |
| O                                  | -0.145728 | 2.888622  | 1.225850                                         | H | -2.093636 | -0.300030 | -2.253813 |
| C                                  | -2.475750 | 3.448551  | 1.175314                                         | H | -3.222475 | 1.056371  | -2.078452 |
| O                                  | 0.472149  | 3.170333  | -0.993669                                        | H | -3.806236 | -0.611760 | -1.881465 |
| C                                  | -1.221935 | 4.660761  | -1.804960                                        | B | -0.428184 | 0.467362  | -0.033837 |
| C                                  | -1.715954 | 2.263031  | -1.360224                                        | N | 0.895724  | 1.069380  | -0.102447 |
| H                                  | -0.552772 | 5.505515  | -1.602581                                        | C | 1.083417  | 2.451368  | -0.174131 |
| H                                  | -2.260897 | 5.001825  | -1.682049                                        | O | 0.221452  | 3.286478  | -0.116095 |
| H                                  | -1.086138 | 4.376973  | -2.857467                                        | H | 2.167226  | 2.699909  | -0.303955 |
| H                                  | -1.547177 | 1.399076  | -0.702469                                        | C | 2.063138  | 0.252028  | -0.073855 |
| H                                  | -1.388485 | 1.978033  | -2.369352                                        | C | 3.110455  | 0.559686  | 0.802513  |
| H                                  | -2.797533 | 2.458526  | -1.397245                                        | C | 2.188621  | -0.845756 | -0.932570 |
| H                                  | -3.252939 | 4.042507  | 0.671801                                         | C | 4.271372  | -0.211715 | 0.808793  |
| H                                  | -2.522866 | 3.677202  | 2.248796                                         | C | 3.343237  | -1.622235 | -0.909185 |
| H                                  | -2.721859 | 2.386370  | 1.050316                                         | C | 4.391670  | -1.306604 | -0.044357 |
| H                                  | 0.269193  | 5.466666  | 0.574399                                         | H | 3.003395  | 1.396761  | 1.496540  |
| H                                  | -0.650540 | 5.296436  | 2.082154                                         | H | 1.372923  | -1.086337 | -1.615733 |

H -1.446247 5.939429 0.627488  
B 0.896028 2.745552 0.281254  
H 2.048106 3.232045 0.574235

H 5.080931 0.039987 1.497660  
H 3.428081 -2.478544 -1.582242  
H 5.298267 -1.915330 -0.033573

**TS-2**, -1222.44318, NImag=1

C 0.689368 2.708401 -0.197603  
C 2.199497 2.543221 0.181902  
C -0.216736 2.783829 1.018996  
O 0.403619 1.448590 -0.862222  
C 0.397091 3.836930 -1.160199  
O 2.306087 1.103909 0.367122  
C 2.609557 3.229323 1.464901  
C 3.138066 2.911836 -0.954059  
H 2.047210 2.853436 2.327524  
H 2.447896 4.314564 1.393482  
H 3.676904 3.062529 1.661367  
H 2.838187 2.431801 -1.895793  
H 4.155156 2.575535 -0.713824  
H 3.168800 3.997611 -1.118516  
H 0.684971 4.805190 -0.725587  
H -0.678066 3.873609 -1.379303  
H 0.925392 3.712691 -2.112739  
H -0.021606 1.962248 1.721593  
H -1.261119 2.683424 0.700590  
H -0.101961 3.739026 1.549995  
B 1.286102 0.556649 -0.355637  
N 1.241038 -0.899111 -0.561005  
C 0.141164 -1.547956 -1.027962  
O -0.846784 -0.923553 -1.572463  
H 0.315732 -2.623259 -1.222765  
C 2.344981 -1.716398 -0.145510  
C 2.961393 -2.562142 -1.071096  
C 2.783111 -1.691941 1.180256  
C 4.010820 -3.386202 -0.669085  
C 3.839404 -2.510228 1.572064  
C 4.453568 -3.360245 0.652234  
H 2.622845 -2.561248 -2.110265  
H 2.293100 -1.029789 1.895053  
H 4.489444 -4.044680 -1.397096  
H 4.179956 -2.488506 2.609563  
H 5.279113 -4.002568 0.965969  
C -3.945702 -1.211317 0.119948  
C -3.312440 0.197394 0.383520  
C -4.116546 -2.008796 1.406774  
O -2.943129 -1.842235 -0.681491  
C -5.243821 -1.183036 -0.661176  
O -1.927543 -0.127598 0.529228  
C -3.797007 0.877043 1.648021  
C -3.472614 1.121364 -0.819653  
H -3.537638 0.296227 2.541970  
H -4.888236 1.018857 1.630168  
H -3.337731 1.870329 1.753800  
H -3.173699 0.616686 -1.748631  
H -2.818375 1.996576 -0.699744  
H -4.505687 1.481846 -0.934926  
H -6.015534 -0.604366 -0.131180  
H -5.627038 -2.203720 -0.798115  
H -5.104484 -0.747487 -1.658106  
H -3.194800 -1.993008 2.005322  
H -4.338357 -3.055470 1.157574  
H -4.938828 -1.626692 2.029531  
B -1.712095 -1.246466 -0.327216  
H -0.855741 -2.027914 0.269346

**TS-3**, -1222.48114, NImag=1

C -0.241761 2.210801 -0.958883  
C -0.695721 2.459469 0.524016  
C -1.370872 2.431747 -1.957843  
O 0.075623 0.815141 -0.953218  
C 0.991986 2.988410 -1.368509  
O -1.258299 1.187293 0.890970  
C -1.765265 3.523554 0.677172  
C 0.466184 2.748320 1.461651  
H -2.679926 3.272538 0.125661  
H -1.404288 4.499204 0.318752  
H -2.035025 3.638328 1.736029  
H 1.263009 2.000975 1.357895  
H 0.107133 2.709553 2.498994  
H 0.892000 3.747622 1.289129  
H 0.826343 4.072759 -1.284379  
H 1.250418 2.770573 -2.414445  
H 1.854325 2.720785 -0.744189  
H -2.279040 1.885976 -1.663645  
H -1.062623 2.052376 -2.941488

**4a**, -1222.53914, NImag=0

C -0.835762 2.750675 -0.268378  
C -2.148575 2.588508 0.568894  
C -1.092758 3.297446 -1.663620  
O -0.402358 1.378970 -0.421218  
C 0.248688 3.546461 0.424383  
O -2.630284 1.296834 0.131148  
C -3.209665 3.628736 0.285418  
C -1.882221 2.483228 2.062026  
H -3.532511 3.609455 -0.762276  
H -2.839176 4.638298 0.515741  
H -4.094559 3.447498 0.909732  
H -1.095498 1.747168 2.278166  
H -2.796572 2.152187 2.571320  
H -1.581364 3.447290 2.494959  
H -0.104361 4.562139 0.655767  
H 1.130021 3.641145 -0.223541  
H 0.569839 3.072862 1.359864  
H -1.899958 2.747914 -2.167717  
H -0.183756 3.187724 -2.270052  
H -1.362670 4.362474 -1.644885  
B -1.532712 0.598676 -0.304618  
N -1.501270 -0.796948 -0.615578  
C -0.243451 -1.327986 -1.059051  
O 0.607068 -1.636430 0.032765  
H -0.425095 -2.251175 -1.631676  
C -2.533076 -1.707636 -0.295014  
C -2.229138 -3.023758 0.089213  
C -3.881160 -1.325045 -0.378813  
C -3.248730 -3.930200 0.370690  
C -4.890388 -2.236239 -0.082504  
C -4.585573 -3.545598 0.289543  
H -1.186828 -3.327408 0.200778  
H -4.131241 -0.309159 -0.683483  
H -2.988317 -4.947964 0.671870  
H -5.933295 -1.917884 -0.157401  
H -5.382115 -4.257684 0.515542  
C 3.732961 -0.037254 -0.561558  
C 4.018779 -0.912044 0.708387  
C 3.436153 1.413235 -0.216694  
O 2.503117 -0.612694 -1.052430  
C 4.787482 -0.127060 -1.642483  
O 2.688928 -1.268279 1.141635  
C 4.721686 -0.179332 1.830442  
C 4.747085 -2.204332 0.373934  
H 4.131755 0.669331 2.196341  
H 5.702401 0.194702 1.501737  
H 4.888841 -0.856462 2.678604  
H 4.262085 -2.733565 -0.458072  
H 4.728883 -2.868472 1.247974  
H 5.796990 -2.026782 0.102219  
H 5.764355 0.210596 -1.266574  
H 4.516232 0.514704 -2.491411  
H 4.897589 -1.149841 -2.021947  
H 2.689717 1.484600 0.586447  
H 3.020094 1.915312 -1.100682  
H 4.338258 1.957161 0.097007  
B 1.883989 -1.182899 0.035513  
H 0.246976 -0.594433 -1.713879

**INT-1**, -325.40444, NImag=0

N -1.531165 -0.826220 -0.553325  
C -0.487625 -1.330280 -1.066218  
H -0.397345 -2.393926 -1.368678  
C -2.639614 -1.629454 -0.265577  
C -2.520630 -2.919738 0.277169  
C -3.919704 -1.097901 -0.487093  
C -3.659706 -3.664601 0.571156  
C -5.051895 -1.857623 -0.214265  
C -4.928127 -3.142606 0.318094  
H -1.527131 -3.319219 0.497283  
H -3.999130 -0.085017 -0.886962  
H -3.555348 -4.660997 1.007499  
H -6.042669 -1.438757 -0.405599  
H -5.819400 -3.729826 0.549404  
H 0.390555 -0.693244 -1.240333

**TS-4**, -736.87528, NImag=1

C 2.011051 -0.502129 0.265497  
C 1.913200 0.855656 0.607127

H -1.629556 3.494543 -2.068416  
 B -0.749951 0.214407 0.033040  
 N -1.788737 -0.885125 -0.502472  
 C -0.896760 -1.883435 -0.566687  
 O 0.139376 -0.987090 0.677060  
 H -1.162588 -2.886220 -0.197898  
 C -3.120058 -1.135589 -0.141865  
 C -3.734675 -2.331763 -0.554990  
 C -3.886604 -0.196572 0.569259  
 C -5.060646 -2.601252 -0.229334  
 C -5.216060 -0.472087 0.873744  
 C -5.812898 -1.673158 0.488490  
 H -3.175124 -3.041403 -1.170769  
 H -3.417395 0.728982 0.898826  
 H -5.514252 -3.538182 -0.561853  
 H -5.794122 0.266932 1.434308  
 H -6.856877 -1.878068 0.734293  
 C 3.474210 -1.378116 -0.519825  
 C 3.694073 -0.478331 0.745128  
 C 3.424031 -0.572188 -1.808030  
 O 2.135700 -1.889415 -0.299325  
 C 4.433826 -2.540368 -0.641810  
 O 2.346571 -0.047573 1.052208  
 C 4.552567 0.744570 0.506371  
 C 4.197796 -1.262745 1.945369  
 H 4.119551 1.407017 -0.252600  
 H 5.562293 0.456980 0.178737  
 H 4.654990 1.322166 1.434863  
 H 3.593603 -2.163729 2.119647  
 H 4.129744 -0.636543 2.844484  
 H 5.245669 -1.569880 1.823065  
 H 5.471044 -2.183408 -0.719891  
 H 4.212510 -3.121373 -1.546893  
 H 4.366154 -3.220301 0.215699  
 H 2.711499 0.260854 -1.725839  
 H 3.083810 -1.218478 -2.628155  
 H 4.410082 -0.171323 -2.080771  
 B 1.502152 -0.963140 0.490791  
 H -0.095092 -1.854162 -1.313110

**5a, -737.00214, NImag=0**

C 2.132718 0.333622 -0.018835  
 C 2.175208 -1.056957 -0.244912  
 C 3.357757 1.000711 0.174073  
 C 3.387774 -1.736040 -0.265860  
 C 4.566010 0.306204 0.148498  
 C 4.596766 -1.067406 -0.069906  
 H 1.249553 -1.604402 -0.406192  
 H 3.380860 2.075060 0.353851  
 H 3.383436 -2.814408 -0.445214  
 H 5.496179 0.858603 0.304557  
 H 5.544728 -1.608844 -0.090154  
 N 0.919688 1.045578 0.002793  
 C 1.006230 2.491075 0.094007  
 H 1.623623 2.908130 -0.716914  
 H 1.445856 2.820212 1.049544  
 C -2.126964 -0.967613 0.211879  
 C -2.657142 0.450466 -0.180730  
 C -2.251188 -1.247636 1.701193  
 O -0.715977 -0.854145 -0.084896  
 C -2.706916 -2.107219 -0.596525  
 O -1.512666 1.285456 0.093705  
 C -3.829497 0.935740 0.643634  
 C -2.959239 0.570879 -1.666408  
 H -3.577960 1.009229 1.708214  
 H -4.690545 0.260096 0.536107  
 H -4.143567 1.932615 0.306708  
 H -2.124168 0.200221 -2.276995  
 H -3.117899 1.626872 -1.921888  
 H -3.863767 0.014366 -1.948493  
 H -3.798528 -2.157931 -0.472975  
 H -2.288536 -3.064511 -0.258346  
 H -2.483874 -2.006274 -1.665220  
 H -1.853927 -0.416542 2.300190  
 H -1.673786 -2.146826 1.952809  
 H -3.294468 -1.418840 2.000739  
 B -0.395086 0.481376 -0.000015  
 H 0.004451 2.921798 0.019074

**INT-2, -810.95616, NImag=0**

N -2.168839 -1.214010 -0.188433  
 C -1.061058 -0.617001 -0.075458  
 O 0.089485 -1.297212 -0.224348  
 C -3.353754 -0.483348 -0.109934

C 3.239356 -0.990250 -0.210789  
 C 3.003505 1.703169 0.447849  
 C 4.330100 -0.137827 -0.358991  
 C 4.217097 1.214493 -0.038389  
 H 0.963503 1.232157 0.986165  
 H 3.355178 -2.053774 -0.436344  
 H 2.906162 2.759010 0.711475  
 H 5.280993 -0.538281 -0.718810  
 H 5.074348 1.881202 -0.153337  
 N 0.904842 -1.338879 0.493393  
 C 0.714876 -2.386311 -0.286348  
 H 1.423579 -2.701285 -1.073921  
 H 0.034891 -3.171033 0.065392  
 C -1.900290 0.785412 -0.596618  
 C -2.390288 -0.166043 0.551257  
 C -2.754782 0.664844 -1.850741  
 O -0.591828 0.266358 -0.906876  
 C -1.760931 2.237672 -0.191342  
 O -1.788073 -1.417824 0.176459  
 C -3.892411 -0.349591 0.610522  
 C -1.851776 0.231943 1.917553  
 H -4.285325 -0.791953 -0.312726  
 H -4.400403 0.611373 0.779941  
 H -4.160021 -1.018849 1.439288  
 H -0.763037 0.372625 1.897560  
 H -2.060185 -0.572844 2.635123  
 H -2.319959 1.152801 2.293577  
 H -2.731238 2.652429 0.119855  
 H -1.397197 2.834385 -1.038771  
 H -1.051785 2.369085 0.635028  
 H -2.889873 -0.386521 -2.140781  
 H -2.253516 1.179995 -2.680956  
 H -3.749007 1.115597 -1.721131  
 B -0.631449 -1.082026 -0.525555  
 H -0.386799 -1.898334 -1.468786

**TS-5, -810.87043, NImag=1**

N -2.048966 -1.380411 -0.534186  
 C -0.830859 -1.296199 -0.526580  
 O 0.276154 -1.768217 -0.811377  
 C -3.085112 -0.509307 -0.216367  
 C -2.961189 0.873481 -0.421681  
 C -4.277884 -1.034816 0.296851  
 C -4.019326 1.716452 -0.093867  
 C -5.327670 -0.180859 0.619081  
 C -5.203101 1.195877 0.428458  
 H -2.042043 1.276970 -0.852752  
 H -4.360216 -2.113400 0.440199  
 H -3.918020 2.791710 -0.257077  
 H -6.253975 -0.596076 1.022189  
 H -6.031084 1.861810 0.679720  
 C 2.768996 0.823470 -0.408443  
 C 2.978438 -0.277291 0.687378  
 C 2.506610 2.196087 0.192594  
 O 1.554752 0.382907 -1.053584  
 C 3.869414 0.895264 -1.444776  
 O 1.616631 -0.606724 1.043328  
 C 3.701195 0.197992 1.928410  
 C 3.632274 -1.532418 0.128743  
 H 3.153643 1.001444 2.435404  
 H 4.707885 0.565225 1.680009  
 H 3.813889 -0.628970 2.642219  
 H 3.139515 -1.864916 -0.795211  
 H 3.546645 -2.343718 0.863695  
 H 4.699502 -1.379055 -0.085344  
 H 4.837143 1.124036 -0.974429  
 H 3.655108 1.689652 -2.172242  
 H 3.966200 -0.045261 -1.999811  
 H 1.733970 2.149339 0.972868  
 H 2.151611 2.875695 -0.593628  
 H 3.413285 2.633138 0.634272  
 B 0.876134 -0.365381 -0.101658  
 H -0.341969 0.022027 0.161763

**TS-6, -1222.42053, NImag=1**

N 1.114392 0.853338 -0.855914  
 C -0.121377 0.927660 -0.386203  
 O -1.111370 0.444040 -1.143770  
 C 2.077850 1.797799 -0.423169

C -3.521677 0.760319 -0.743897  
C -4.438585 -1.034695 0.591824  
C -4.734191 1.439941 -0.655275  
C -5.641588 -0.343712 0.686775  
C -5.797377 0.896907 0.065033  
H -2.700408 1.175196 -1.334443  
H -4.308253 -2.010774 1.063456  
H -4.850908 2.401254 -1.161949  
H -6.472070 -0.782683 1.245164  
H -6.747916 1.430662 0.130298  
C 2.866035 0.863681 0.425245  
C 3.526841 -0.377371 -0.271408  
C 3.005634 0.831524 1.937789  
O 1.458466 0.664587 0.126514  
C 3.298759 2.203063 -0.126664  
O 2.472222 -1.369753 -0.200906  
C 4.752549 -0.915908 0.431869  
C 3.812703 -0.138781 -1.744867  
H 4.527604 -1.248479 1.451862  
H 5.541938 -0.152006 0.480955  
H 5.154576 -1.777567 -0.116764  
H 2.935815 0.271488 -2.264659  
H 4.069212 -1.091994 -2.224854  
H 4.652970 0.553534 -1.891528  
H 4.382230 2.343668 -0.003098  
H 2.793466 3.016231 0.410848  
H 3.056172 2.305826 -1.190759  
H 2.711904 -0.144200 2.349028  
H 2.352124 1.593634 2.381998  
H 4.035809 1.040530 2.256726  
B 1.307604 -0.674842 -0.099059  
H -0.937534 0.459280 0.155767

C 2.082936 2.396777 0.844321  
C 3.097540 2.116240 -1.328025  
C 3.073418 3.314328 1.183099  
C 4.089122 3.031441 -0.982972  
C 4.079586 3.638078 0.272576  
H 1.330810 2.117864 1.586453  
H 3.083604 1.641445 -2.311516  
H 3.068411 3.768674 2.176903  
H 4.873529 3.274759 -1.703707  
H 4.857344 4.355071 0.544534  
C -4.147215 0.614981 0.746387  
C -4.522553 -0.325335 -0.453575  
C -4.632727 2.040838 0.552342  
O -2.694013 0.649693 0.661803  
C -4.543172 0.090399 2.107571  
O -3.429761 -0.094195 -1.383682  
C -5.825668 0.018983 -1.138178  
C -4.477380 -1.797697 -0.082140  
H -5.815372 1.032137 -1.556547  
H -6.667325 -0.058315 -0.434934  
H -6.014164 -0.679780 -1.963427  
H -3.538747 -2.057360 0.426688  
H -4.539679 -2.405110 -0.994029  
H -5.313275 -2.078390 0.572915  
H -5.632832 -0.041376 2.171426  
H -4.246654 0.801828 2.889369  
H -4.064460 -0.869587 2.332402  
H -4.362568 2.428776 -0.439595  
H -4.170109 2.691527 1.305874  
H -5.722848 2.117055 0.663065  
B -2.389275 0.333609 -0.628172  
H -0.433727 1.665643 0.378205  
C 2.223008 -2.363936 -0.528325  
C 2.710018 -1.895641 0.886560  
C 3.084494 -1.790758 -1.646330  
O 0.917588 -1.771945 -0.605397  
C 2.084010 -3.863848 -0.683056  
O 2.131795 -0.585973 0.996362  
C 4.213233 -1.766469 1.023826  
C 2.141234 -2.758940 2.004046  
H 4.616075 -1.014124 0.334131  
H 4.714672 -2.726476 0.828963  
H 4.475741 -1.452316 2.043354  
H 1.056037 -2.890099 1.889129  
H 2.320908 -2.267143 2.969666  
H 2.606476 -3.754839 2.038551  
H 3.045610 -4.370438 -0.511769  
H 1.752930 -4.110076 -1.701210  
H 1.344634 -4.276465 0.014211  
H 3.250341 -0.713426 -1.510345  
H 2.569939 -1.929561 -2.606634  
H 4.064798 -2.285711 -1.705238  
B 1.017077 -0.582259 0.130465  
H -0.081909 -0.326653 0.737977

TS-7, -1222.39480, NImag=1

N 0.886771 0.909515 0.849307  
B 0.726481 -0.603600 0.192366  
O 1.593742 -0.753068 -0.899970  
C 2.049525 -2.115932 -0.856607  
C 3.416149 -2.194112 -1.502814  
C 0.173998 1.210068 1.862490  
C 1.599761 1.980963 0.205148  
C 0.952457 3.197348 -0.024647  
C 1.640076 4.233496 -0.651407  
C 2.961001 4.053859 -1.059151  
C 3.592975 2.830861 -0.836538  
C 2.919964 1.789172 -0.203266  
O 0.915409 -1.640285 1.126859  
C 2.030019 -2.420858 0.680357  
C 3.278678 -1.921436 1.394499  
C 1.782302 -3.875978 1.024213  
C 1.044250 -2.967367 -1.621381  
H 4.626511 2.681916 -1.156539  
H 3.497598 4.866016 -1.553939  
H 1.132558 5.183756 -0.830284  
H -0.092156 3.317577 0.272404  
H 3.404583 0.829214 -0.033213  
H 1.791924 -4.014829 2.113667  
H 0.807177 -4.218037 0.658100  
H 2.563473 -4.522677 0.597219  
H 3.120498 -1.975978 2.479998  
H -0.509708 -0.541699 -0.160276  
H 0.058261 -2.949445 -1.134652

3A, -3528.35176, NImag=0

Co 0.027835 -0.833100 -1.529444  
P -1.801608 -0.052164 -0.529825  
C -1.713208 -0.650310 1.208579  
C -0.745961 -1.618173 1.526651  
C -2.514062 -0.157212 2.247760  
C -0.575446 -2.065033 2.838227  
C -2.351668 -0.591633 3.559892  
C -1.377256 -1.545517 3.851012  
H -3.261161 0.609324 2.023432  
H 0.189909 -2.807070 3.068902  
H -2.981277 -0.184506 4.353457  
H -1.236849 -1.895259 4.876304  
P 1.775985 0.049245 -0.433950  
C 2.330175 -1.494238 0.416521  
C 1.350978 -2.448478 0.728304  
C 3.668273 -1.846788 0.626475  
C 1.674712 -3.715410 1.199405  
C 4.009641 -3.105320 1.121753  
C 3.015938 -4.042261 1.399009  
O 0.020827 -2.113582 0.485651  
H 4.455733 -1.130257 0.376683  
H 0.876908 -4.435265 1.391725  
H 5.060428 -3.361053 1.273445  
H 3.281781 -5.036668 1.763929  
H 0.676425 -1.744954 -2.695806  
C 1.714701 1.286426 0.917423  
C 1.501526 0.920031 2.254656  
C 1.705684 2.652730 0.588462

H 4.168158 -2.520113 1.150811  
H 3.493636 -0.872348 1.147322  
H 1.366267 -4.014899 -1.705833  
H 0.926153 -2.564494 -2.636602  
H 4.120216 -1.478750 -1.059249  
H 3.842111 -3.203277 -1.401644  
H 3.344322 -1.966797 -2.575081  
B -1.650614 -0.181288 0.693386  
O -2.130541 0.995423 0.114940  
O -2.560405 -1.218938 0.622270  
C -3.499919 0.738098 -0.261463  
C -3.526845 -0.823506 -0.376603  
C -3.801619 1.468351 -1.552759  
H -3.070891 1.232283 -2.335506  
H -4.804814 1.212212 -1.924596  
H -3.774660 2.554368 -1.390262  
C -4.384762 1.252211 0.864099  
H -4.166599 2.313467 1.043164  
H -5.453346 1.161661 0.622758  
H -4.195386 0.708811 1.800072  
C -3.020647 -1.315827 -1.725306  
H -2.862134 -2.401724 -1.679204  
H -3.737844 -1.112479 -2.532905  
H -2.062215 -0.848023 -1.993490  
C -4.859004 -1.458440 -0.043218  
H -5.163803 -1.246491 0.988379  
H -5.646902 -1.097155 -0.720533  
H -4.796873 -2.549282 -0.153325  
H -0.967199 -0.069879 1.742492  
O -0.147682 1.829254 2.797524

C 1.271564 1.889037 3.231124  
C 1.501685 3.619724 1.568192  
C 1.274059 3.242298 2.893332  
H 1.517673 -0.135589 2.540853  
H 1.858416 2.961322 -0.450765  
H 1.101469 1.581258 4.266160  
H 1.506284 4.677413 1.292309  
H 1.103184 4.001328 3.660516  
C 3.269950 0.546694 -1.374132  
C 3.343237 0.132777 -2.710913  
C 4.327802 1.287055 -0.826730  
C 4.458946 0.448319 -3.484211  
C 5.439556 1.605099 -1.605099  
C 5.507486 1.185257 -2.934194  
H 2.506847 -0.443519 -3.123741  
H 4.282639 1.618109 0.215287  
H 4.506399 0.120413 -4.525458  
H 6.259071 2.182789 -1.170353  
H 6.379819 1.436621 -3.542511  
C -3.360821 -0.814086 -1.147919  
C -3.257950 -1.739397 -2.192843  
C -4.623560 -0.537814 -0.604281  
C -4.394186 -2.382502 -2.684704  
C -5.757758 -1.178513 -1.095819  
C -5.644177 -2.103779 -2.135928  
H -2.270835 -1.947285 -2.624503  
H -4.723830 0.193669 0.203480  
H -4.300357 -3.101161 -3.502190  
H -6.737597 -0.955483 -0.666567  
H -6.535791 -2.605092 -2.520252  
C -2.267420 1.706733 -0.332847  
C -1.687475 2.501121 0.667773  
C -3.106318 2.320356 -1.276073  
C -1.960727 3.865719 0.735874  
C -3.374102 3.685940 -1.207782  
C -2.805975 4.463271 -0.198851  
H -1.017581 2.050592 1.407125  
H -3.559634 1.722132 -2.071833  
H -1.504999 4.464033 1.529153  
H -4.034081 4.144430 -1.948156  
H -3.019853 5.533145 -0.142807

<sup>1</sup>A, -3528.32468, NImag=0

Co -0.014351 0.378435 -1.282106  
P -1.886675 -0.035876 -0.460399  
C -2.376534 1.640496 0.131479  
C -1.317580 2.552764 0.241884  
C -3.676899 2.135609 0.283851  
C -1.519887 3.910954 0.446589  
C -3.901907 3.494304 0.515622  
C -2.829583 4.380074 0.588063  
H -4.524161 1.449913 0.194033  
H -0.669960 4.594612 0.470633  
H -4.923960 3.865149 0.619261  
H -3.004462 5.447306 0.738932  
P 1.925938 0.018577 -0.608268  
C 2.068530 1.233445 0.762729  
C 0.963874 2.068815 0.992259  
C 3.145172 1.300748 1.654265  
C 0.891760 2.878954 2.123749  
C 3.105813 2.130871 2.771757  
C 1.967767 2.898854 3.012128  
O -0.034880 2.031082 0.014263  
H 4.016378 0.663226 1.474137  
H 0.009850 3.485327 2.327282  
H 3.950082 2.164437 3.463186  
H 1.908556 3.532517 3.899790  
H -0.014324 -0.777758 -2.232232  
C -3.395387 -0.654133 -1.300950  
C -3.399364 -0.616987 -2.700251  
C -4.521773 -1.145802 -0.626753  
C -4.516269 -1.043740 -3.416848  
C -5.638141 -1.573705 -1.342891  
C -5.637370 -1.520119 -2.737951  
H -2.497937 -0.264356 -3.212622  
H -4.520864 -1.199933 0.466915  
H -4.507951 -1.014825 -4.509091  
H -6.513379 -1.955192 -0.811074  
H -6.512014 -1.860961 -3.297374  
C -1.842902 -1.066178 1.054919  
C -1.755928 -0.509633 2.338182  
C -1.778316 -2.462662 0.917987  
C -1.630576 -1.330543 3.459335  
C -1.660032 -3.278722 2.037977  
C -1.589643 -2.716370 3.314272

<sup>5</sup>A, -3528.28669, NImag=0

Co 0.061581 -0.324747 1.774953  
P 1.873231 -0.002644 0.366027  
C 2.140890 1.740929 -0.086274  
C 1.050149 2.456561 -0.636008  
C 3.259426 2.472853 0.348016  
C 1.062184 3.846154 -0.701353  
C 3.287119 3.862388 0.262464  
C 2.186419 4.548787 -0.248314  
H 4.110138 1.941920 0.780366  
H 0.206463 4.395954 -1.088971  
H 4.166853 4.410839 0.604780  
H 2.192148 5.639549 -0.304126  
P -1.830448 0.003255 0.486013  
C -2.286983 1.413779 -0.598116  
C -1.265655 2.108215 -1.274100  
C -3.608768 1.849636 -0.780577  
C -1.563093 3.117379 -2.187210  
C -3.907892 2.901989 -1.641177  
C -2.887724 3.521227 -2.366066  
O 0.019825 1.652566 -1.076150  
H -4.416344 1.343444 -0.245441  
H -0.761484 3.570250 -2.771964  
H -4.944549 3.220226 -1.767885  
H -3.118755 4.318398 -3.075533  
H 0.214713 0.426841 3.174210  
C -1.788229 -1.393717 -0.704485  
C -1.726143 -2.685350 -0.156912  
C -1.762363 -1.236666 -2.092797  
C -1.679638 -3.801851 -0.989559  
C -1.682778 -2.358422 -2.924546  
C -1.653481 -3.637090 -2.375391  
H -1.716276 -2.803779 0.933964  
H -1.805164 -0.237227 -2.534407  
H -1.658526 -4.804210 -0.554491  
H -1.638686 -2.224795 -4.008289  
H -1.602430 -4.511521 -3.029577  
C -3.292782 -0.322319 1.509859  
C -4.426616 -0.999937 1.025698  
C -3.277225 0.120829 2.841739  
C -5.522555 -1.215335 1.862921  
C -4.373951 -0.094948 3.670075  
C -5.500636 -0.765343 3.180625

H -1.797584 0.576946 2.466621  
H -1.817595 -2.911808 -0.079866  
H -1.573770 -0.881432 4.454245  
H -1.610472 -4.363478 1.913607  
H -1.494958 -3.358625 4.193303  
C 1.989652 -1.610360 0.227687  
C 1.790585 -1.775789 1.605449  
C 2.129060 -2.756643 -0.573013  
C 1.762479 -3.050660 2.169442  
C 2.096888 -4.027844 -0.007631  
C 1.919293 -4.180796 1.368936  
H 1.651134 -0.902997 2.249903  
H 2.263529 -2.647127 -1.653727  
H 1.608469 -3.157949 3.246298  
H 2.212309 -4.906931 -0.646821  
H 1.896315 -5.178761 1.813526  
C 3.606136 0.119876 -1.371775  
C 4.705128 -0.648311 -0.963444  
C 3.777592 1.037513 -2.416708  
C 5.947032 -0.490132 -1.578204  
C 5.018758 1.201843 -3.027155  
C 6.107350 0.436189 -2.608440  
H 4.589010 -1.381271 -0.158951  
H 2.914526 1.621273 -2.754449  
H 6.795924 -1.095641 -1.250449  
H 5.135913 1.922299 -3.840491  
H 7.080322 0.556041 -3.091058  
<sup>2</sup>[Co](H)<sub>2</sub>, -3528.93819, NImag=0  
Co -0.004278 0.063734 -0.762911  
P -2.141893 0.003131 -0.436677  
C -2.230571 0.443572 1.357984  
C -1.086871 0.218460 2.146039  
C -3.340371 1.031501 1.971737  
C -1.038257 0.592052 3.487901  
C -3.318005 1.386998 3.320002  
C -2.164038 1.172087 4.070614  
H -4.232282 1.240732 1.373981  
H -0.121365 0.458919 4.063287  
H -4.195085 1.848374 3.777843  
H -2.126604 1.471405 5.120372  
P 2.127961 0.091553 -0.409632  
C 2.238573 -0.859759 1.172170  
C 1.086676 -0.933777 1.976497  
C 3.369924 -1.570704 1.585503  
C 1.055689 -1.698884 3.141312  
C 3.364172 -2.318343 2.762516  
C 2.205059 -2.383167 3.533311  
O -0.015139 -0.298519 1.463876  
H 4.265879 -1.558214 0.957685  
H 0.133427 -1.784383 3.717331  
H 4.258479 -2.866042 3.065967  
H 2.181834 -2.988340 4.442279  
H 0.227921 -1.453598 -1.099661  
H -0.234904 1.602479 -0.564111  
C 3.035351 1.649080 -0.037175  
C 2.501303 2.850926 -0.513843  
C 4.235360 1.678470 0.687863  
C 3.161332 4.058600 -0.286192  
C 4.888444 2.885533 0.925204  
C 4.353771 4.078310 0.434812  
H 1.547633 2.820979 -1.050479  
H 4.667911 0.749922 1.071731  
H 2.735652 4.989999 -0.667398  
H 5.819975 2.896334 1.496400  
H 4.867377 5.024736 0.620933  
C 3.321332 -0.814940 -1.468977  
C 3.090269 -2.177946 -1.712044  
C 4.410253 -0.192659 -2.091836  
C 3.944070 -2.904399 -2.535676  
C 5.257059 -0.920931 -2.929432  
C 5.031005 -2.277462 -3.148749  
H 2.222959 -2.661194 -1.251590  
H 4.604150 0.870181 -1.926082  
H 3.755944 -3.966923 -2.707833  
H 6.100789 -0.420328 -3.410528  
H 5.697244 -2.846978 -3.801088  
C -3.257182 1.239029 -1.201555  
C -3.057289 2.599342 -0.920117  
C -4.233154 0.881025 -2.140277  
C -3.835420 3.572269 -1.539785  
C -5.003332 1.859428 -2.770486  
C -4.811892 3.205502 -2.468031  
H -2.274473 2.890408 -0.213035  
H -4.396332 -0.171504 -2.386385

H -4.448598 -1.358680 -0.007116  
H -2.385429 0.629682 3.223302  
H -6.398077 -1.744132 1.478821  
H -4.348235 0.255180 4.703831  
H -6.359747 -0.937721 3.832612  
C 1.862837 -0.951612 -1.193315  
C 1.666755 -2.335608 -1.108256  
C 2.063827 -0.362721 -2.446801  
C 1.698021 -3.123339 -2.254214  
C 2.075994 -1.151054 -3.597024  
C 1.901585 -2.531991 -3.502062  
H 1.481401 -2.790690 -0.127126  
H 2.216374 0.718071 -2.520074  
H 1.551267 -4.203735 -2.176292  
H 2.230854 -0.684778 -4.571673  
H 1.919815 -3.148517 -4.403727  
C 3.417253 -0.507335 1.183169  
C 3.476654 -0.452864 2.583148  
C 4.547795 -0.920980 0.461761  
C 4.649122 -0.795460 3.251057  
C 5.717564 -1.270123 1.135420  
C 5.772258 -1.206582 2.528960  
H 2.590463 -0.134191 3.144859  
H 4.511979 -0.970125 -0.630569  
H 4.685680 -0.747937 4.341504  
H 6.594528 -1.591094 0.569212  
H 6.690533 -1.479228 3.052532  
<sup>4</sup>[Co](H)<sub>2</sub>, -3528.92226, NImag=0  
Co 0.091384 -0.234946 1.829957  
P 1.882102 -0.032976 0.360777  
C 2.184762 1.704674 -0.108724  
C 1.115412 2.423553 -0.681132  
C 3.325792 2.412760 0.284224  
C 1.166896 3.811408 -0.798626  
C 3.401220 3.796564 0.135059  
C 2.313755 4.490862 -0.386338  
H 4.160171 1.871596 0.737484  
H 0.318219 4.371016 -1.188940  
H 4.300518 4.330789 0.446943  
H 2.347502 5.578709 -0.478327  
P -1.792310 0.010107 0.498304  
C -2.232001 1.442437 -0.571012  
C -1.212625 2.096846 -1.286009  
C -3.550019 1.870912 -0.771503  
C -1.510223 3.076269 -2.235545  
C -3.850566 2.888576 -1.674528  
C -2.831602 3.475134 -2.422298  
O 0.066331 1.638083 -1.091965  
H -4.358521 1.392529 -0.213188  
H -0.709094 3.502080 -2.840557  
H -4.886200 3.206640 -1.809782  
H -3.062236 4.244169 -3.162791  
H -0.054999 -1.762037 2.305257  
H 0.254307 0.876161 2.974146  
C -1.862820 -1.381779 -0.690988  
C -1.879232 -2.681299 -0.157104  
C -1.833528 -1.218439 -2.081327  
C -1.902801 -3.788219 -1.000425  
C -1.841220 -2.331811 -2.921543  
C -1.886130 -3.616947 -2.385630  
H -1.866258 -2.816298 0.929039  
H -1.809096 -0.217260 -2.520179  
H -1.929118 -4.792955 -0.571328  
H -1.812808 -2.189261 -4.004628  
H -1.899354 -4.486951 -3.046952  
C -3.281519 -0.237793 1.527624  
C -4.449046 -0.862593 1.066266  
C -3.215976 0.199426 2.857634  
C -5.538839 -1.029015 1.918415  
C -4.310084 0.035898 3.705478  
C -5.471818 -0.576569 3.237064  
H -4.501751 -1.226354 0.035289  
H -2.288182 0.653910 3.224046  
H -6.444684 -1.518428 1.552542  
H -4.248764 0.377666 4.741173  
H -6.326480 -0.711632 3.904319  
C 1.853682 -0.988915 -1.190925  
C 1.534187 -2.351499 -1.089306  
C 2.113355 -0.437647 -2.450581  
C 1.502527 -3.151464 -2.227540  
C 2.066344 -1.240213 -3.590673  
C 1.768202 -2.597535 -3.480822  
H 1.300844 -2.777758 -0.107125  
H 2.359245 0.624595 -2.540512



H -3.673584 4.626518 -1.302460  
H -5.758809 1.563116 -3.502126  
H -5.418379 3.970571 -2.958485  
C -3.140281 -1.545597 -0.503880  
C -4.471703 -1.603325 -0.063591  
C -2.531078 -2.711907 -0.975997  
C -5.176622 -2.803073 -0.098896  
C -3.239084 -3.914135 -1.014443  
C -4.560250 -3.962254 -0.575603  
H -4.968158 -0.699567 0.302727  
H -1.487072 -2.656375 -1.303640  
H -6.212711 -2.835617 0.246938  
H -2.752654 -4.818420 -1.388396  
H -5.114580 -4.903635 -0.603239  
<sup>2</sup>[Co], -3527.73943, NImag=0  
Co -0.153011 -0.427385 0.391411  
P -2.299248 -0.008719 0.533557  
C -1.650470 -0.714658 -1.024442  
C -0.435365 -0.144911 -1.569512  
C -2.040250 -1.979433 -1.551580  
C 0.197777 -0.717757 -2.701304  
C -1.365968 -2.565384 -2.607511  
C -0.247254 -1.929621 -3.188515  
H -2.912967 -2.481953 -1.124631  
H 1.069633 -0.220949 -3.135337  
H -1.718123 -3.518623 -3.008094  
H 0.276004 -2.398866 -4.025057  
P 1.958517 -0.062468 0.453636  
C 2.131589 1.327587 -0.750472  
C 1.003262 1.773884 -1.466499  
C 3.353495 1.970950 -0.991621  
C 1.100179 2.825698 -2.377487  
C 3.457847 3.020543 -1.901228  
C 2.325429 3.451346 -2.591901  
O -0.251075 1.239087 -1.270867  
H 4.237821 1.657082 -0.429339  
H 0.196484 3.141297 -2.902106  
H 4.421825 3.507102 -2.064030  
H 2.394473 4.277303 -3.303398  
C 2.975783 -1.413824 -0.278954  
C 2.289905 -2.531182 -0.772019  
C 4.369596 -1.357861 -0.419380  
C 2.977053 -3.569412 -1.398460  
C 5.057395 -2.393941 -1.047746  
C 4.362346 -3.499993 -1.540322  
H 1.198687 -2.564293 -0.668428  
H 4.926379 -0.504926 -0.019660  
H 2.426103 -4.433617 -1.777798  
H 6.143782 -2.339763 -1.152427  
H 4.904730 -4.310892 -2.032553  
C 3.010135 0.509202 1.849996  
C 2.987215 1.852394 2.256102  
C 3.724069 -0.412313 2.630997  
C 3.677400 2.264802 3.393008  
C 4.411049 0.000748 3.771084  
C 4.394205 1.341121 4.154880  
H 2.420684 2.585294 1.673688  
H 3.746086 -1.467712 2.343380  
H 3.653892 3.316957 3.687298  
H 4.965426 -0.731909 4.362841  
H 4.934879 1.665136 5.047073  
C -3.606868 -1.181364 1.023531  
C -3.208675 -2.342028 1.702853  
C -4.966464 -0.988787 0.744421  
C -4.145544 -3.298830 2.082328  
C -5.905529 -1.941404 1.138620  
C -5.498653 -3.097496 1.804049  
H -2.146232 -2.488493 1.928178  
H -5.292212 -0.090741 0.211921  
H -3.821020 -4.200979 2.606204  
H -6.963681 -1.781647 0.917633  
H -6.237314 -3.841996 2.110013  
C -3.196346 1.531831 0.148530  
C -3.317016 2.015261 -1.160096  
C -3.753737 2.270661 1.202984  
C -3.987540 3.212384 -1.408103  
C -4.433425 3.459296 0.951119  
C -4.548871 3.935155 -0.356183  
H -2.882447 1.445076 -1.985486  
H -3.656140 1.907199 2.230925  
H -4.076842 3.580072 -2.433370  
H -4.869841 4.021659 1.780104  
H -5.075714 4.871714 -0.553594

H 1.254187 -4.211639 -2.136941  
H 2.271705 -0.801910 -4.570472  
H 1.735683 -3.225020 -4.374959  
C 3.444215 -0.543694 1.154688  
C 3.505896 -0.491422 2.554062  
C 4.562856 -0.976826 0.430560  
C 4.677681 -0.850535 3.217611  
C 5.730696 -1.340413 1.098306  
C 5.790051 -1.274907 2.491101  
H 2.622861 -0.166308 3.116569  
H 4.518456 -1.030835 -0.661565  
H 4.718219 -0.806895 4.308359  
H 6.599483 -1.678565 0.528440  
H 6.706359 -1.562545 3.012233  
<sup>4</sup>[Co], -3527.72874, NImag=0  
Co 0.038151 -1.453652 -0.707973  
P -1.755546 -0.102101 -0.350553  
C -1.601137 1.545813 -1.129384  
C -0.524714 2.359347 -0.724551  
C -2.347842 1.952066 -2.242010  
C -0.193260 3.522865 -1.415803  
C -2.036920 3.124351 -2.930656  
C -0.956587 3.901301 -2.520485  
H -3.178556 1.330012 -2.584968  
H 0.657885 4.126689 -1.097289  
H -2.634142 3.421901 -3.794730  
H -0.697713 4.814151 -3.061658  
P 1.980971 -0.257365 -0.383551  
C 2.458807 1.372073 0.318748  
C 1.450401 2.301485 0.618268  
C 3.784337 1.742565 0.584768  
C 1.736847 3.533348 1.201723  
C 4.084975 2.982169 1.146003  
C 3.061876 3.875351 1.463471  
O 0.143167 1.927715 0.392256  
H 4.592705 1.043153 0.355959  
H 0.914242 4.208702 1.446473  
H 5.125077 3.246004 1.348936  
H 3.293297 4.840684 1.918817  
C 1.395070 -1.219197 1.029148  
C 1.096754 -2.607388 0.703955  
C 0.986693 -0.690426 2.272365  
C 0.460306 -3.396920 1.716302  
C 0.340003 -1.482922 3.205132  
C 0.075545 -2.847785 2.916091  
H 1.736186 -3.134524 -0.018874  
H 1.184887 0.361556 2.501613  
H 0.293336 -4.460396 1.523550  
H 0.031128 -1.054400 4.161134  
H -0.423966 -3.470281 3.663758  
C 3.592668 -0.969812 -0.867335  
C 4.340879 -1.768152 0.010266  
C 4.080296 -0.739820 -2.161915  
C 5.557121 -2.314458 -0.399395  
C 5.302233 -1.273812 -2.563797  
C 6.041901 -2.065591 -1.682892  
H 3.964917 -1.954583 1.021002  
H 3.493928 -0.133941 -2.859904  
H 6.131629 -2.936888 0.291106  
H 5.676664 -1.078439 -3.571532  
H 6.995530 -2.493667 -2.000847  
C -2.360688 0.206717 1.343074  
C -2.672342 -0.920046 2.118720  
C -2.482389 1.478916 1.916281  
C -3.115971 -0.777527 3.429882  
C -2.912159 1.617952 3.235126  
C -3.234936 0.492646 3.994541  
H -2.557848 -1.921261 1.689580  
H -2.250694 2.369771 1.327111  
H -3.356671 -1.666419 4.018697  
H -3.005826 2.616366 3.669532  
H -3.575370 0.606090 5.026420  
C -3.246523 -0.803484 -1.160348  
C -3.069435 -1.822587 -2.101929  
C -4.543146 -0.356255 -0.871145  
C -4.165945 -2.379838 -2.758449  
C -5.639275 -0.915209 -1.523799  
C -5.451832 -1.925574 -2.469694  
H -2.048115 -2.184611 -2.297227  
H -4.691532 0.434104 -0.128349  
H -4.015697 -3.176141 -3.491370  
H -6.647557 -0.563671 -1.291983  
H -6.314199 -2.364049 -2.977836

H<sub>2</sub>, -1.16721, NImag=0  
H 0.000000 0.000000 0.377177  
H 0.000000 0.000000 -0.377177  
<sup>3</sup>TS\_1, -3927.77346, NImag=1  
Co 0.064054 -0.758182 -1.117735  
P 1.143359 0.842339 -0.000058  
C 1.589318 0.436352 1.742443  
C 0.626059 -0.204583 2.549936  
C 2.895560 0.511840 2.246640  
C 0.950381 -0.740899 3.792643  
C 3.226402 -0.011706 3.496129  
C 2.255897 -0.644286 4.269421  
H 3.681223 0.963505 1.636266  
H 0.167265 -1.247057 4.360641  
H 4.254476 0.063017 3.857816  
H 2.513201 -1.069851 5.241743  
P -2.065214 -0.435600 -0.419033  
C -2.405392 0.720751 0.965709  
C -1.552404 0.627799 2.079565  
C -3.322252 1.778618 0.946034  
C -1.632059 1.515543 3.149339  
C -3.404749 2.685205 2.002978  
C -2.568348 2.546626 3.108663  
O -0.647725 -0.408818 2.067920  
H -3.972997 1.909055 0.077644  
H -0.952738 1.401670 3.997446  
H -4.124880 3.505020 1.957837  
H -2.634009 3.249994 3.942082  
H -0.032820 -1.909829 -2.250721  
C 3.259189 -2.463396 -0.270374  
C 4.479210 -1.932224 0.169467  
C 3.091172 -2.809468 -1.620268  
C 5.522482 -1.752238 -0.733796  
C 4.145256 -2.627640 -2.510590  
C 5.362690 -2.102785 -2.074456  
H 4.590725 -1.675724 1.224762  
H 2.125359 -3.191846 -1.958680  
H 6.470255 -1.335075 -0.385404  
H 4.008984 -2.899181 -3.560354  
H 6.184901 -1.962759 -2.780010  
N 2.247608 -2.656102 0.656982  
C 1.081789 -2.965525 0.745564  
O -0.019234 -3.267905 1.010630  
C 0.279789 2.462953 0.086383  
C -0.480547 2.811598 -1.037877  
C 0.358236 3.357817 1.157962  
C -1.137020 4.036696 -1.101571  
C -0.306637 4.583255 1.098530  
C -1.049410 4.926925 -0.030133  
H -0.565044 2.095395 -1.862958  
H 0.931505 3.090612 2.052165  
H -1.728417 4.291254 -1.984719  
H -0.248446 5.271980 1.945299  
H -1.569625 5.886858 -0.071019  
C 2.725283 1.388816 -0.766484  
C 3.154966 0.708781 -1.911059  
C 3.455330 2.503208 -0.325142  
C 4.303426 1.115491 -2.590087  
C 4.608897 2.901577 -0.995223  
C 5.035710 2.206717 -2.129349  
H 2.572276 -0.146118 -2.273463  
H 3.112350 3.071379 0.545317  
H 4.623290 0.573578 -3.483327  
H 5.171773 3.768174 -0.639863  
H 5.935712 2.527693 -2.659461  
C -3.246809 0.076596 -1.723865  
C -2.726447 0.471468 -2.961730  
C -4.638122 0.032729 -1.554225  
C -3.574709 0.852958 -4.000905  
C -5.486705 0.412054 -2.591537  
C -4.955761 0.828874 -3.813923  
H -1.641394 0.443870 -3.114861  
H -5.057306 -0.307895 -0.602076  
H -3.155674 1.155920 -4.963296  
H -6.569543 0.375696 -2.449533  
H -5.623374 1.122207 -4.627689  
C -2.808084 -2.008581 0.159453  
C -3.355812 -2.194807 1.432811  
C -2.758649 -3.092556 -0.729447  
C -3.843583 -3.445446 1.812171  
C -3.258219 -4.334848 -0.352329  
C -3.797500 -4.516617 0.922201  
H -3.401790 -1.361416 2.139235  
H -2.294363 -2.956971 -1.711694

<sup>3</sup>Int\_1, -3927.78044, NImag=0  
Co 0.425828 -0.897857 -0.008331  
P 0.994205 1.327352 -0.050043  
C 0.618047 2.373125 1.417615  
C -0.623133 2.236567 2.063003  
C 1.546691 3.259603 1.981323  
C -0.919043 2.932225 3.232197  
C 1.253993 3.972996 3.142072  
C 0.023799 3.801397 3.774650  
H 2.524904 3.382708 1.509002  
H -1.891144 2.772987 3.702319  
H 1.996547 4.656433 3.558878  
H -0.204834 4.345676 4.693478  
P -1.873880 -0.955226 -0.053341  
C -2.698353 0.646948 -0.358736  
C -2.295318 1.715009 0.463165  
C -3.491440 0.941065 -1.474051  
C -2.631857 3.033850 0.167299  
C -3.851098 2.255475 -1.771874  
C -3.409815 3.298212 -0.959487  
O -1.561091 1.363794 1.565653  
H -3.808951 0.130671 -2.135860  
H -2.279332 3.843210 0.810890  
H -4.462999 2.465758 -2.651529  
H -3.671237 4.331317 -1.200012  
H 0.554373 -2.441537 -0.288220  
C 3.380358 -2.794360 0.582317  
C 4.130927 -3.958476 0.822831  
C 3.505408 -2.168645 -0.673079  
C 4.963744 -4.483582 -0.159808  
C 4.343139 -2.698013 -1.649684  
C 5.076176 -3.859011 -1.403468  
H 4.039966 -4.438493 1.799492  
H 2.955677 -1.243197 -0.864794  
H 5.534390 -5.392294 0.048782  
H 4.430090 -2.187481 -2.612986  
H 5.735700 -4.269849 -2.171229  
N 2.601024 -2.288489 1.608236  
C 1.519459 -1.647030 1.508413  
O 0.701356 -1.011143 2.168449  
C -2.560990 -2.015856 -1.374873  
C -1.729203 -2.367724 -2.444404  
C -3.885763 -2.472899 -1.358418  
C -2.218959 -3.142039 -3.495445  
C -4.372203 -3.253470 -2.404717  
C -3.540834 -3.584490 -3.476302  
H -0.679888 -2.051948 -2.430848  
H -4.538533 -2.215459 -0.518150  
H -1.560745 -3.413527 -4.323879  
H -5.404983 -3.609332 -2.382957  
H -3.923479 -4.199493 -4.294296  
C -2.626796 -1.614347 1.469137  
C -3.747874 -1.039842 2.078954  
C -2.030831 -2.744727 2.045534  
C -4.276032 -1.598436 3.241923  
C -2.566089 -3.303194 3.202984  
C -3.688452 -2.731497 3.803302  
H -4.211449 -0.150221 1.641848  
H -1.138835 -3.177458 1.582066  
H -5.152059 -1.144943 3.711993  
H -2.095813 -4.184049 3.645723  
H -4.102743 -3.167431 4.715491  
C 0.412990 2.338681 -1.458718  
C -0.245729 1.694175 -2.511593  
C 0.605733 3.725970 -1.517963  
C -0.699369 2.420094 -3.612245  
C 0.151901 4.450718 -2.616539  
C -0.500633 3.798278 -3.665020  
H -0.414091 0.611891 -2.456361  
H 1.113709 4.240128 -0.695905  
H -1.218878 1.906436 -4.424585  
H 0.306337 5.531597 -2.656355  
H -0.858928 4.369631 -4.524629  
C 2.818076 1.416197 -0.148242  
C 3.490874 1.756217 -1.328510  
C 3.557197 0.931352 0.944646  
C 4.877340 1.618896 -1.411436  
C 4.938852 0.799392 0.857070  
C 5.602893 1.139853 -0.322916  
H 2.930799 2.124751 -2.192621  
H 3.043053 0.642417 1.867191

H -4.263969 -3.581214 2.811801  
H -3.213829 -5.171949 -1.053279  
H -4.179250 -5.495508 1.222294  
<sup>3</sup>TS\_2, -3927.77993, NImag=1  
Co 0.415222 -0.845021 0.079476  
P 1.004032 1.349990 -0.047005  
C 0.603091 2.418534 1.396291  
C -0.652460 2.301014 2.017312  
C 1.529697 3.301661 1.968244  
C -0.965891 3.016181 3.169977  
C 1.219871 4.033612 3.112841  
C -0.025791 3.883577 3.720170  
H 2.519902 3.404977 1.516207  
H -1.948689 2.872284 3.622364  
H 1.960905 4.713789 3.537549  
H -0.268388 4.442581 4.626481  
P -1.865114 -0.932657 -0.047463  
C -2.663478 0.666081 -0.428030  
C -2.278530 1.752423 0.378975  
C -3.412569 0.937154 -1.578876  
C -2.591468 3.065670 0.035750  
C -3.748396 2.246224 -1.924426  
C -3.326282 3.306503 -1.124668  
O -1.587626 1.426286 1.516710  
H -3.713251 0.112171 -2.230484  
H -2.253702 3.889049 0.669432  
H -4.325498 2.438199 -2.831379  
H -3.568505 4.335046 -1.402031  
H 0.579077 -2.419094 0.088505  
C 3.274926 -2.850814 0.644279  
C 4.021763 -4.022129 0.866648  
C 3.358948 -2.243535 -0.625356  
C 4.804603 -4.571252 -0.143024  
C 4.146445 -2.797461 -1.630470  
C 4.872238 -3.965859 -1.399946  
H 3.966072 -4.488444 1.852636  
H 2.824622 -1.305022 -0.803490  
H 5.371897 -5.484796 0.053811  
H 4.202577 -2.298861 -2.602344  
H 5.493800 -4.395781 -2.188628  
N 2.542614 -2.319582 1.689546  
C 1.437645 -1.706268 1.577399  
O 0.656958 -1.037564 2.256759  
C 0.480859 2.349065 -1.486541  
C -0.145801 1.695759 -2.553461  
C 0.687847 3.733797 -1.557059  
C -0.553248 2.410573 -3.679202  
C 0.279926 4.447321 -2.680753  
C -0.340381 3.786164 -3.743245  
H -0.325839 0.615944 -2.488950  
H 1.170474 4.255023 -0.724233  
H -1.047604 1.890521 -4.503092  
H 0.445528 5.526186 -2.729520  
H -0.662161 4.348705 -4.622877  
C 2.830972 1.395999 -0.090164  
C 3.516013 0.869726 1.018840  
C 3.553815 1.742783 -1.238253  
C 4.896013 0.703542 0.978161  
C 4.938563 1.571102 -1.273484  
C 5.610920 1.050688 -0.169804  
H 2.960874 0.573505 1.915085  
H 3.035156 2.142770 -2.114131  
H 5.412195 0.279768 1.842407  
H 5.492979 1.842801 -2.174917  
H 6.692881 0.905703 -0.205525  
C -2.477256 -2.029511 -1.375714  
C -3.807419 -2.465957 -1.444068  
C -1.569418 -2.446682 -2.356523  
C -4.223216 -3.289639 -2.487587  
C -1.987139 -3.266435 -3.404222  
C -3.314575 -3.686897 -3.470493  
H -4.519352 -2.158853 -0.671166  
H -0.518371 -2.143931 -2.275913  
H -5.260959 -3.628391 -2.532876  
H -1.269732 -3.589564 -4.161862  
H -3.641871 -4.336615 -4.285654  
C -2.694592 -1.557775 1.449731  
C -3.830135 -0.959845 2.008277  
C -2.137761 -2.688018 2.064110  
C -4.409936 -1.495867 3.157587  
C -2.724352 -3.224150 3.206691  
C -3.860520 -2.629096 3.755998  
H -4.263998 -0.069807 1.542380  
H -1.234304 -3.139676 1.643466

H 5.391248 1.885971 -2.337911  
H 5.497546 0.409253 1.710661  
H 6.686368 1.022410 -0.394900  
<sup>3</sup>Int\_2, -3927.78997, NImag=0  
Co 0.190452 -0.651956 -1.011632  
P 1.027464 1.260936 -0.079049  
C 1.349935 1.369990 1.734147  
C 0.380294 0.867872 2.619879  
C 2.539122 1.859274 2.294484  
C 0.586207 0.833406 3.996364  
C 2.752528 1.841275 3.671706  
C 1.779178 1.321870 4.524194  
H 3.317771 2.252267 1.635134  
H -0.196438 0.417182 4.633678  
H 3.688429 2.229417 4.079088  
H 1.946785 1.296154 5.603106  
P -1.987430 -0.803245 -0.230482  
C -2.600535 0.667130 0.657140  
C -1.793354 1.162880 1.697256  
C -3.676773 1.451861 0.226995  
C -2.021861 2.415006 2.262585  
C -3.926962 2.698854 0.798357  
C -3.090775 3.182969 1.802612  
O -0.785598 0.332001 2.115359  
H -4.311673 1.091715 -0.587229  
H -1.358726 2.785977 3.047451  
H -4.765233 3.301573 0.443114  
H -3.267073 4.169729 2.236845  
H -0.099722 0.040679 -2.371208  
C 2.667193 -2.616239 -0.644063  
C 2.578084 -2.962326 0.713926  
C 3.823321 -2.950426 -1.369220  
C 3.628070 -3.630894 1.335592  
C 4.865044 -3.621430 -0.735185  
C 4.776980 -3.965263 0.615656  
H 1.676574 -2.679548 1.266990  
H 3.891080 -2.663558 -2.420923  
H 3.550328 -3.890970 2.394324  
H 5.762322 -3.877384 -1.304875  
H 5.600101 -4.490608 1.104853  
N 1.608307 -1.929267 -1.229008  
C 1.607377 -1.201073 -2.309297  
O 2.180331 -0.979544 -3.337465  
C -2.131248 -2.176445 0.972120  
C -1.352348 -3.317683 0.736248  
C -2.945346 -2.127855 2.110673  
C -1.401508 -4.399783 1.612441  
C -2.989730 -3.209818 2.988286  
C -2.221095 -4.347447 2.739795  
H -0.688176 -3.348178 -0.135077  
H -3.541532 -1.232923 2.315601  
H -0.786568 -5.281791 1.418489  
H -3.626291 -3.162729 3.875221  
H -2.255352 -5.192204 3.431739  
C -3.312250 -1.144970 -1.444960  
C -3.074865 -0.859121 -2.795024  
C -4.555455 -1.667798 -1.060723  
C -4.073066 -1.076481 -3.744720  
C -5.548339 -1.887285 -2.012167  
C -5.309166 -1.588966 -3.355011  
H -2.092341 -0.474498 -3.089602  
H -4.746921 -1.906270 -0.009913  
H -3.878571 -0.851927 -4.795971  
H -6.513798 -2.296518 -1.705329  
H -6.088740 -1.764563 -4.100193  
C 2.686753 1.481328 -0.806983  
C 2.914945 2.376279 -1.859505  
C 3.703567 0.581881 -0.446355  
C 4.138290 2.378376 -2.528542  
C 4.924596 0.590474 -1.113485  
C 5.144109 1.487644 -2.159561  
H 2.127353 3.068769 -2.168969  
H 3.537478 -0.140477 0.359989  
H 4.301002 3.078010 -3.351608  
H 5.701857 -0.119841 -0.821327  
H 6.098146 1.486951 -2.691574  
C 0.183735 2.858999 -0.406635  
C 0.585408 4.050574 0.213882  
C -0.892523 2.882184 -1.299901  
C -0.077998 5.243894 -0.058866  
C -1.556823 4.078339 -1.571002  
C -1.151844 5.258930 -0.951573  
H 1.424332 4.044001 0.916817  
H -1.200365 1.946596 -1.779297

H -5.296605 -1.023819 3.587761  
 H -2.283452 -4.104944 3.678721  
 H -4.315633 -3.046336 4.657392  
 3TS\_3 -3927.78994, NImag=1  
 Co 0.204060 -0.672386 -0.959911  
 P 1.012211 1.268235 -0.072123  
 C 1.309644 1.413905 1.742631  
 C 0.335579 0.916292 2.626060  
 C 2.486563 1.927148 2.307431  
 C 0.526297 0.908421 4.005172  
 C 2.684226 1.936242 3.687082  
 C 1.707344 1.420232 4.537597  
 H 3.268149 2.317211 1.649789  
 H -0.258862 0.494593 4.640928  
 H 3.610684 2.342827 4.098044  
 H 1.862845 1.415524 5.618616  
 P -1.979595 -0.823863 -0.223805  
 C -2.618241 0.655376 0.630955  
 C -1.828480 1.175218 1.672793  
 C -3.694905 1.424271 0.174145  
 C -2.073782 2.434852 2.213686  
 C -3.961979 2.678810 0.721035  
 C -3.142493 3.186553 1.727366  
 O -0.819442 0.360369 2.118586  
 H -4.316593 1.045552 -0.641849  
 H -1.423874 2.824300 3.000650  
 H -4.800281 3.268652 0.344858  
 H -3.332095 4.179032 2.142516  
 H -0.036557 -0.080097 -2.376118  
 C 2.719128 -2.605824 -0.637724  
 C 2.658029 -2.954618 0.721416  
 C 3.865579 -2.929062 -1.383236  
 C 3.724538 -3.614457 1.323729  
 C 4.923997 -3.592062 -0.768562  
 C 4.863311 -3.938362 0.583063  
 H 1.764997 -2.678144 1.291334  
 H 3.913416 -2.639638 -2.435127  
 H 3.668101 -3.875843 2.383525  
 H 5.813220 -3.839384 -1.354510  
 H 5.699527 -4.457139 1.056843  
 N 1.642507 -1.927090 -1.199180  
 C 1.622398 -1.193971 -2.277825  
 O 2.201528 -0.960295 -3.300218  
 C -2.128381 -2.177941 1.000128  
 C -1.328237 -3.311196 0.799574  
 C -2.965094 -2.121753 2.121777  
 C -1.379150 -4.378859 1.693223  
 C -3.011001 -3.189044 3.017184  
 C -2.221442 -4.319361 2.803375  
 H -0.647090 -3.346779 -0.058453  
 H -3.577674 -1.232111 2.299719  
 H -0.748101 -5.255041 1.526515  
 H -3.665244 -3.136023 3.890821  
 H -2.257116 -5.152560 3.509130  
 C -3.285475 -1.197295 -1.450053  
 C -3.031746 -0.935235 -2.801908  
 C -4.530043 -1.722506 -1.073579  
 C -4.014637 -1.178230 -3.761272  
 C -5.507734 -1.967897 -2.034416  
 C -5.252097 -1.693158 -3.379227  
 H -2.048286 -0.549029 -3.091087  
 H -4.734542 -1.942906 -0.021300  
 H -3.806979 -0.972065 -4.813766  
 H -6.474157 -2.379066 -1.733258  
 H -6.019674 -1.889119 -4.131741  
 C 2.679377 1.495407 -0.780372  
 C 2.920046 2.386331 -1.833395  
 C 3.694628 0.602768 -0.398895  
 C 4.153884 2.390433 -2.483124  
 C 4.925911 0.613328 -1.046617  
 C 5.157620 1.506013 -2.093986  
 H 2.134723 3.074059 -2.158776  
 H 3.518887 -0.116308 0.408347  
 H 4.326496 3.086698 -3.307046  
 H 5.701522 -0.092069 -0.738562  
 H 6.119781 1.506820 -2.611167  
 C 0.154154 2.848225 -0.444846  
 C 0.526504 4.058149 0.157820  
 C -0.902918 2.836742 -1.360971  
 C -0.146934 5.235825 -0.155492  
 C -1.577191 4.017191 -1.672974  
 C -1.201203 5.216397 -1.071220  
 H 1.350368 4.078107 0.878188  
 H -1.187989 1.885999 -1.824914

H 0.243647 6.168226 0.427209  
 H -2.400053 4.083885 -2.266154  
 H -1.673585 6.195601 -1.162823  
 3B, -3927.84337, NImag=0  
 Co 0.308379 -0.863962 -0.517169  
 P 0.963415 1.241658 0.012198  
 C 1.002867 1.847879 1.750671  
 C -0.067215 1.526797 2.606535  
 C 2.082543 2.551353 2.304529  
 C -0.053486 1.869409 3.956418  
 C 2.100427 2.909847 3.651321  
 C 1.035361 2.561929 4.480976  
 H 2.931083 2.813198 1.666464  
 H -0.903702 1.580939 4.577602  
 H 2.954610 3.457984 4.054415  
 H 1.049243 2.830697 5.539523  
 P -1.857447 -0.937063 -0.070412  
 C -2.664257 0.654594 0.332623  
 C -2.079991 1.430526 1.349653  
 C -3.660776 1.247336 -0.451640  
 C -2.450497 2.755932 1.561057  
 C -4.048612 2.570412 -0.242980  
 C -3.436084 3.324733 0.755394  
 O -1.134594 0.802375 2.124634  
 H -4.119899 0.671311 -1.259793  
 H -1.959501 3.337627 2.344768  
 H -4.819537 3.016889 -0.874423  
 H -3.722211 4.367309 0.912080  
 H 2.774234 -1.493501 -3.068156  
 C 3.055390 -2.506211 -0.562552  
 C 3.056308 -2.668706 0.836699  
 C 4.139357 -3.039369 -1.287936  
 C 4.103617 -3.309241 1.488712  
 C 5.184722 -3.678658 -0.627711  
 C 5.181951 -3.816936 0.761408  
 H 2.209680 -2.256820 1.398918  
 H 4.165180 -2.956460 -2.376309  
 H 4.077954 -3.413983 2.576569  
 H 6.015769 -4.082252 -1.212447  
 H 6.005746 -4.322492 1.269580  
 N 1.983621 -1.827386 -1.119301  
 C 1.929991 -1.344162 -2.356615  
 O 0.925295 -0.684182 -2.710035  
 C 0.102326 2.594326 -0.878916  
 C 0.237723 3.944045 -0.527636  
 C -0.693181 2.245662 -1.976765  
 C -0.412897 4.929376 -1.266326  
 C -1.338996 3.234533 -2.718041  
 C -1.201421 4.575421 -2.363009  
 H 0.856900 4.225799 0.330072  
 H -0.792841 1.188071 -2.244090  
 H -0.303839 5.980134 -0.986501  
 H -1.957413 2.953000 -3.573850  
 H -1.711205 5.349924 -2.941370  
 C 2.700167 1.422908 -0.534598  
 C 3.045500 2.085007 -1.719338  
 C 3.684262 0.678792 0.135890  
 C 4.348561 2.010277 -2.213553  
 C 4.982584 0.606081 -0.357079  
 C 5.318382 1.271707 -1.537890  
 H 2.289519 2.649519 -2.271668  
 H 3.425054 0.127325 1.045454  
 H 4.603125 2.529983 -3.140432  
 H 5.727309 0.006708 0.173025  
 H 6.334659 1.207976 -1.933793  
 C -2.933696 -1.616102 -1.389889  
 C -2.417928 -1.645541 -2.692717  
 C -4.227912 -2.098377 -1.151280  
 C -3.196537 -2.131344 -3.743710  
 C -4.999842 -2.588099 -2.202226  
 C -4.485960 -2.601616 -3.500381  
 H -1.395867 -1.293790 -2.877577  
 H -4.634419 -2.091850 -0.135069  
 H -2.787491 -2.149911 -4.756557  
 H -6.007235 -2.964210 -2.008009  
 H -5.092514 -2.987797 -4.323164  
 C -2.221416 -2.001179 1.377811  
 C -1.367427 -3.089075 1.604331  
 C -3.276279 -1.766876 2.268142  
 C -1.578611 -3.942742 2.685146  
 C -3.483739 -2.617496 3.352678  
 C -2.638803 -3.708055 3.560693  
 H -0.524467 -3.258581 0.922801  
 H -3.934947 -0.905831 2.115728

H 0.151402 6.175060 0.316688  
H -2.405069 3.996024 -2.386038  
H -1.730595 6.140969 -1.314247  
**B''**, -3927.81660, NImag=0  
Co -0.127463 -0.474832 -0.780875  
P 1.730328 0.818687 -0.346298  
C 2.042588 0.725377 1.464382  
C 0.931261 0.524855 2.300174  
C 3.305715 0.781708 2.066642  
C 1.059680 0.374443 3.676260  
C 3.447707 0.643571 3.446490  
C 2.327822 0.438328 4.252055  
H 4.191505 0.925862 1.442038  
H 0.164335 0.200666 4.276692  
H 4.442624 0.689482 3.894169  
H 2.439248 0.319551 5.331802  
P -2.292308 -0.337925 -0.233077  
C -2.284670 1.223226 0.736662  
C -1.188075 1.433351 1.597245  
C -3.196088 2.271005 0.569161  
C -0.996935 2.646684 2.251303  
C -3.021851 3.489271 1.226578  
C -1.920334 3.674605 2.058713  
O -0.316378 0.373261 1.712909  
H -4.050219 2.132438 -0.100092  
H -0.122905 2.791492 2.889890  
H -3.743274 4.295606 1.079964  
H -1.766249 4.630936 2.563696  
H -0.895514 -2.173517 -2.911579  
C 1.509605 -2.872248 -0.694404  
C 1.610990 -2.544557 0.677082  
C 2.514243 -3.700083 -1.243651  
C 2.675362 -2.978966 1.460299  
C 3.577991 -4.126563 -0.452197  
C 3.679274 -3.768276 0.895731  
H 0.800694 -1.954617 1.123487  
H 2.442708 -3.989774 -2.290409  
H 2.717118 -2.698695 2.517218  
H 4.352088 -4.755372 -0.902192  
H 4.520801 -4.113814 1.500800  
N 0.448424 -2.299782 -1.385376  
C -0.007668 -2.783111 -2.568258  
O 0.388971 -3.726199 -3.235526  
C -2.787473 -1.600442 0.991557  
C -2.291464 -2.899547 0.815882  
C -3.595515 -1.312803 2.100483  
C -2.621287 -3.902552 1.725910  
C -3.918328 -2.318137 3.009883  
C -3.434116 -3.613652 2.821521  
H -1.627000 -3.111033 -0.028655  
H -3.969841 -0.295502 2.254361  
H -2.228702 -4.911653 1.582845  
H -4.548511 -2.088730 3.872635  
H -3.685270 -4.399077 3.538347  
C -3.726389 -0.128732 -1.342863  
C -3.488616 0.442652 -2.601177  
C -5.030374 -0.512153 -1.004179  
C -4.536954 0.654256 -3.493009  
C -6.077162 -0.309694 -1.902636  
C -5.834224 0.277768 -3.143929  
H -2.465003 0.711513 -2.884715  
H -5.228880 -0.976553 -0.034064  
H -4.338422 1.099929 -4.470260  
H -7.090164 -0.615871 -1.631296  
H -6.656373 0.432165 -3.846436  
C 3.392610 0.730822 -1.088635  
C 3.892874 1.732834 -1.931445  
C 4.141093 -0.443905 -0.903203  
C 5.124888 1.568805 -2.564197  
C 5.372769 -0.597778 -1.532012  
C 5.868223 0.406844 -2.364875  
H 3.318213 2.647603 -2.099555  
H 3.756892 -1.243882 -0.262906  
H 5.503999 2.356986 -3.219011  
H 5.940733 -1.517940 -1.375208  
H 6.831628 0.280283 -2.864118  
C 1.226180 2.576951 -0.518556  
C 1.919469 3.623886 0.105122  
C 0.058180 2.866581 -1.233667  
C 1.451094 4.932034 0.009258  
C -0.415065 4.174120 -1.325846  
C 0.282125 5.208103 -0.703324  
H 2.829815 3.410605 0.674545  
H -0.493453 2.040564 -1.700323

H -0.907119 -4.788850 2.848500  
H -4.309073 -2.426124 4.042899  
H -2.802362 -4.372362 4.412515  
**B'**, -3927.82239, NImag=0  
Co 0.001509 -0.581971 -0.523991  
P -2.284618 -0.507840 -0.335984  
C -2.919241 1.080488 -1.037130  
C -2.036424 2.174811 -1.025738  
C -4.195135 1.290701 -1.576953  
C -2.392205 3.420130 -1.535891  
C -4.568765 2.535142 -2.082738  
C -3.668774 3.600408 -2.064198  
H -4.911764 0.465198 -1.593072  
H -1.662347 4.232300 -1.514533  
H -5.571537 2.672947 -2.492838  
H -3.957082 4.574500 -2.465022  
P 1.761711 0.730416 -0.047927  
C 0.989863 2.016781 1.014514  
C -0.297850 2.450826 0.636023  
C 1.511910 2.491078 2.222339  
C -1.054562 3.285520 1.453630  
C 0.772365 3.343301 3.041995  
C -0.511939 3.726162 2.660142  
O -0.750261 1.961025 -0.565821  
H 2.509706 2.168876 2.533630  
H -2.065487 3.572704 1.157330  
H 1.196760 3.699013 3.982963  
H -1.108127 4.373886 3.307074  
H 0.235443 -4.377821 0.495314  
C 1.921564 -2.802186 -0.610610  
C 2.442490 -2.205765 -1.778702  
C 2.774024 -3.653765 0.121197  
C 3.744526 -2.448859 -2.201504  
C 4.072465 -3.905086 -0.314694  
C 4.571024 -3.307589 -1.473991  
H 1.780687 -1.552902 -2.360060  
H 2.421435 -4.087769 1.060171  
H 4.114642 -1.967867 -3.111697  
H 4.716069 -4.561608 0.277995  
H 5.594239 -3.503762 -1.802615  
N 0.637765 -2.454520 -0.214699  
C -0.156853 -3.328402 0.429063  
O -1.259116 -3.050989 0.905510  
C -2.411879 -0.085410 1.447138  
C -3.502391 0.614837 1.978103  
C -1.299874 -0.338209 2.262056  
C -3.479453 1.056675 3.300115  
C -1.267522 0.124589 3.575500  
C -2.358142 0.821155 4.096111  
H -4.371989 0.826083 1.347597  
H -0.464067 -0.920508 1.854943  
H -4.337250 1.597230 3.707731  
H -0.389046 -0.062870 4.198235  
H -2.333967 1.182336 5.127214  
C -3.613553 -1.697108 -0.691792  
C -4.189458 -2.470139 0.323920  
C -3.985428 -1.933688 -2.023999  
C -5.144395 -3.435524 0.012766  
C -4.943494 -2.896774 -2.330467  
C -5.528428 -3.648186 -1.310784  
H -3.868854 -2.329665 1.358358  
H -3.521298 -1.357080 -2.830705  
H -5.585803 -4.033532 0.813412  
H -5.228573 -3.066260 -3.371519  
H -6.276587 -4.407525 -1.549933  
C 3.082917 0.006737 0.970520  
C 2.737177 -0.534848 2.220869  
C 4.366076 -0.236606 0.462885  
C 3.662138 -1.269827 2.955364  
C 5.286866 -0.981804 1.197579  
C 4.941573 -1.495936 2.445379  
H 1.729002 -0.381569 2.619380  
H 4.644997 0.139020 -0.525146  
H 3.378225 -1.679025 3.927847  
H 6.278572 -1.172029 0.780358  
H 5.664113 -2.082824 3.017182  
C 2.591647 1.707905 -1.352428  
C 2.125619 1.571925 -2.664770  
C 3.630679 2.609895 -1.084957  
C 2.693396 2.314389 -3.699297  
C 4.202644 3.346837 -2.118935  
C 3.735623 3.198853 -3.426669  
H 1.299642 0.879638 -2.863173  
H 3.995667 2.731822 -0.060312

H 1.997561 5.742145 0.498128  
H -1.336129 4.381722 -1.875904  
H -0.087526 6.234211 -0.769066

<sup>3</sup>TS\_4, -4339.36635, NImag=1

Co -0.044975000 -0.395643000 -0.212467000  
P 2.112554000 0.522585000 -0.527254000  
C 2.708335000 1.257118000 1.073004000  
C 1.727208000 1.839760000 1.890822000  
C 4.028421000 1.297895000 1.539129000  
C 2.021301000 2.426699000 3.117736000  
C 4.345254000 1.892814000 2.760310000  
C 3.344869000 2.456764000 3.551349000  
H 4.827581000 0.868867000 0.929827000  
H 1.211562000 2.847800000 3.718373000  
H 5.384660000 1.916930000 3.094907000  
H 3.591715000 2.916391000 4.510796000  
P -2.038967000 0.600425000 0.632028000  
C -1.672833000 2.399587000 0.712210000  
C -0.374770000 2.772751000 1.111809000  
C -2.546789000 3.412045000 0.304112000  
C 0.049844000 4.098269000 1.094431000  
C -2.138920000 4.746295000 0.285489000  
C -0.843025000 5.082632000 0.673088000  
O 0.419356000 1.721170000 1.469331000  
H -3.559734000 3.149843000 -0.012077000  
H 1.073425000 4.348970000 1.380610000  
H -2.835426000 5.522462000 -0.037424000  
H -0.513131000 6.123724000 0.642494000  
H 0.070465000 -1.557563000 -4.035178000  
C -1.801172000 -1.635121000 -2.395630000  
C -2.478048000 -2.336792000 -1.377637000  
C -2.446350000 -1.524546000 -3.646536000  
C -3.740418000 -2.881422000 -1.591296000  
C -3.699909000 -2.092107000 -3.859853000  
C -4.363309000 -2.768207000 -2.835147000  
H -1.982320000 -2.440128000 -0.409425000  
H -1.974646000 -0.946907000 -4.445437000  
H -4.245072000 -3.404049000 -0.772778000  
H -4.177639000 -1.980365000 -4.837587000  
H -5.355853000 -3.193001000 -3.001233000  
N -0.571067000 -1.036274000 -2.118088000  
C 0.338008000 -0.982009000 -3.109525000  
O 1.417838000 -0.391331000 -3.063799000  
C 0.721126000 -3.899937000 0.523279000  
C 1.915801000 -3.745222000 1.518037000  
C 1.133094000 -3.711636000 -0.925394000  
O -0.107218000 -2.754225000 0.890149000  
C -0.102441000 -5.154869000 0.701194000  
O 2.000998000 -2.300962000 1.676167000  
C 3.234294000 -4.271000000 0.997341000  
C 1.612968000 -4.314502000 2.894676000  
H 3.523222000 -3.800795000 0.050156000  
H 3.178133000 -5.357693000 0.837317000  
H 4.033157000 -4.082310000 1.728018000  
H 0.646385000 -3.953379000 3.273504000  
H 2.389784000 -3.994756000 3.601481000  
H 1.591585000 -5.413061000 2.886072000  
H 0.512937000 -6.051355000 0.536819000  
H -0.921685000 -5.173584000 -0.030227000  
H -0.544666000 -5.217586000 1.703013000  
H 1.720525000 -2.789574000 -1.065379000  
H 0.237687000 -3.630643000 -1.556308000  
H 1.729318000 -4.560771000 -1.287019000  
B 0.756308000 -1.805848000 1.392243000  
H 0.363591000 -0.709954000 1.744571000  
C 1.787333000 2.109541000 -1.400178000  
C 0.548500000 2.295989000 -2.025426000  
C 2.694179000 3.176318000 -1.354429000  
C 0.215807000 3.529273000 -2.581427000  
C 2.368587000 4.404909000 -1.927539000  
C 1.125573000 4.585160000 -2.535230000  
H -0.158242000 1.459665000 -2.060535000  
H 3.662964000 3.046463000 -0.861272000  
H -0.762102000 3.666324000 -3.050353000  
H 3.086796000 5.227903000 -1.892461000  
H 0.865433000 5.552568000 -2.972238000  
C 3.659930000 -0.148705000 -1.219985000  
C 4.324540000 -1.162165000 -0.513402000  
C 4.161614000 0.257973000 -2.462010000  
C 5.482203000 -1.741513000 -1.030685000  
C 5.320269000 -0.321974000 -2.973445000  
C 5.985244000 -1.320407000 -2.261461000  
H 3.929310000 -1.493112000 0.451856000  
H 3.627271000 1.014933000 -3.039288000

H 2.321539 2.200801 -4.720116  
H 5.015780 4.044399 -1.904468  
H 4.185834 3.779198 -4.235495

<sup>3</sup>Int\_3, -4339.36691, NImag=0

Co -0.047357000 0.332884000 -0.114469000  
P -2.108752000 -0.753754000 -0.449850000  
C -2.653320000 -1.297289000 1.223199000  
C -1.635191000 -1.732606000 2.088558000  
C -3.954305000 -1.239765000 1.735076000  
C -1.889208000 -2.134198000 3.395799000  
C -4.227525000 -1.641087000 3.043232000  
C -3.200712000 -2.097981000 3.868851000  
H -4.765325000 -0.879623000 1.096511000  
H -1.062074000 -2.453222000 4.033582000  
H -5.251522000 -1.595771000 3.420370000  
H -3.414458000 -2.411460000 4.892958000  
P 2.079071000 -0.527203000 0.500721000  
C 1.788428000 -2.297978000 0.921401000  
C 0.531003000 -2.654758000 1.446718000  
C 2.715332000 -3.322999000 0.697586000  
C 0.206861000 -3.980191000 1.730189000  
C 2.410123000 -4.651616000 0.988323000  
C 1.154426000 -4.974786000 1.499683000  
O -0.343699000 -1.615605000 1.612054000  
H 3.691108000 -3.073276000 0.271369000  
H -0.787268000 -4.229510000 2.106166000  
H 3.149875000 -5.433577000 0.806566000  
H 0.898962000 -6.015104000 1.714282000  
H -0.003092000 1.825912000 -3.795263000  
C 1.689380000 1.973753000 -1.966246000  
C 2.208895000 2.698641000 -0.875809000  
C 2.474632000 1.908012000 -3.136957000  
C 3.437696000 3.347423000 -0.958844000  
C 3.696415000 2.570472000 -3.217101000  
C 4.190192000 3.297489000 -2.132809000  
H 1.602071000 2.773171000 0.027810000  
H 2.138522000 1.294898000 -3.976858000  
H 3.808096000 3.903320000 -0.091931000  
H 4.286250000 2.491514000 -4.134951000  
H 5.155517000 3.805164000 -2.198454000  
N 0.471658000 1.303610000 -1.833030000  
C -0.317646000 1.192411000 -2.922847000  
O -1.323896000 0.490726000 -3.016461000  
C -1.250009000 4.222772000 0.841036000  
C -2.603109000 3.524734000 1.195381000  
C -1.096156000 4.486907000 -0.648074000  
O -0.292650000 3.191291000 1.189040000  
C -0.946270000 5.464257000 1.648981000  
O -2.304797000 2.130611000 0.921848000  
C -3.779126000 3.963162000 0.351615000  
C -2.942715000 3.614513000 2.674535000  
H -3.598325000 3.823085000 -0.720442000  
H -4.001629000 5.026598000 0.523768000  
H -4.674258000 3.383916000 0.616646000  
H -2.086682000 3.325644000 3.299834000  
H -3.769096000 2.927538000 2.900591000  
H -3.253861000 4.628415000 2.962775000  
H -1.715785000 6.233193000 1.487232000  
H 0.018754000 5.888734000 1.341669000  
H -0.890916000 5.250836000 2.723302000  
H -1.322963000 3.587163000 -1.238957000  
H -0.055539000 4.762431000 -0.866141000  
H -1.745619000 5.305639000 -0.987798000  
B -0.938294000 1.989193000 1.011363000  
H -0.373155000 0.961596000 1.454066000  
C -1.610499000 -2.386915000 -1.141841000  
C -2.178191000 -3.602476000 -0.734098000  
C -0.540573000 -2.412191000 -2.047814000  
C -1.694323000 -4.813650000 -1.227894000  
C -0.053585000 -3.624031000 -2.534248000  
C -0.628620000 -4.827477000 -2.126046000  
H -2.993680000 -3.608267000 -0.003762000  
H -0.099558000 -1.464226000 -2.371700000  
H -2.145770000 -5.752906000 -0.898131000  
H 0.782349000 -3.628666000 -3.239098000  
H -0.242385000 -5.776772000 -2.504793000  
C -3.684534000 -0.337420000 -1.277308000  
C -4.669100000 -1.297544000 -1.542214000  
C -3.905216000 0.988626000 -1.662542000  
C -5.862491000 -0.932893000 -2.163560000  
C -5.100302000 1.354247000 -2.277184000  
C -6.081408000 0.395471000 -2.527941000  
H -4.504044000 -2.343359000 -1.266934000  
H -3.119549000 1.723927000 -1.484098000

H 5.991974000 -2.527835000 -0.467006000  
H 5.701743000 0.003402000 -3.944247000  
H 6.892151000 -1.773972000 -2.668500000  
C -3.693775000 0.576271000 -0.135216000  
C -4.876028000 0.324413000 0.570256000  
C -3.755889000 0.788200000 -1.520952000  
C -6.098325000 0.282237000 -0.101859000  
C -4.976647000 0.753405000 -2.186131000  
C -6.151658000 0.496548000 -1.477532000  
H -4.845788000 0.159806000 1.650656000  
H -2.832481000 0.969367000 -2.081779000  
H -7.015525000 0.082682000 0.457570000  
H -5.007523000 0.908268000 -3.267099000  
H -7.109412000 0.457114000 -2.001727000  
C -2.316150000 0.110066000 2.370724000  
C -2.140803000 0.978046000 3.454661000  
C -2.609818000 -1.240249000 2.621912000  
C -2.256712000 0.506163000 4.762429000  
C -2.738523000 -1.705202000 3.927274000  
C -2.556157000 -0.833511000 5.002639000  
H -1.913820000 2.033229000 3.276923000  
H -2.729466000 -1.933771000 1.783045000  
H -2.115457000 1.193855000 5.599805000  
H -2.973338000 -2.757221000 4.106789000  
H -2.646386000 -1.200252000 6.027715000

TS\_5, -4339.35741, NImag=1

Co -0.141947 0.166771 0.117089  
P -2.174735 -0.926536 -0.218703  
C -2.585105 -1.845430 1.322844  
C -1.532843 -2.179799 2.192251  
C -3.891514 -2.086176 1.771353  
C -1.758196 -2.707961 3.460579  
C -4.131238 -2.639315 3.028234  
C -3.067132 -2.945237 3.875220  
H -4.735120 -1.827828 1.126742  
H -0.909184 -2.918968 4.113646  
H -5.158286 -2.820765 3.351598  
H -3.252645 -3.360446 4.868115  
P 1.996531 -0.557102 0.467838  
C 1.895163 -2.336181 0.955368  
C 0.723032 -2.804523 1.574257  
C 2.905817 -3.265786 0.678925  
C 0.574779 -4.150160 1.917325  
C 2.774199 -4.609238 1.021698  
C 1.605019 -5.045534 1.641342  
O -0.258770 -1.864382 1.765552  
H 3.808733 -2.929663 0.161087  
H -0.350859 -4.504018 2.372941  
H 3.577726 -5.312946 0.796466  
H 1.481164 -6.097979 1.906866  
H -0.589620 2.698178 -2.947541  
C 1.350563 2.209119 -1.525918  
C 2.248415 2.824556 -0.635588  
C 1.815828 1.922145 -2.825662  
C 3.531818 3.176149 -1.047810  
C 3.093171 2.293623 -3.235560  
C 3.960225 2.935187 -2.352660  
H 1.918064 3.065680 0.372248  
H 1.171888 1.364609 -3.511839  
H 4.203469 3.657837 -0.330926  
H 3.420843 2.052113 -4.250372  
H 4.966979 3.217381 -2.670152  
N 0.038073 1.838238 -1.151160  
C -0.899200 1.979072 -2.142402  
O -1.984454 1.427205 -2.197083  
C -0.889799 4.529257 0.924001  
C -2.316712 3.877481 0.913498  
C -0.500170 5.127312 -0.420324  
O -0.046098 3.393456 1.187237  
C -0.672859 5.550239 2.022741  
O -2.050193 2.534814 0.482405  
C -3.293030 4.515665 -0.055326  
C -2.930205 3.787146 2.303877  
H -2.957375 4.415966 -1.095083  
H -3.436535 5.583681 0.167570  
H -4.275163 4.027671 0.019274  
H -2.230717 3.330695 3.017780  
H -3.825744 3.151568 2.263858  
H -3.230052 4.770908 2.692762  
H -1.376813 6.390030 1.925873  
H 0.344312 5.960657 1.960657  
H -0.793688 5.110226 3.019887  
H -0.668468 4.425859 -1.247130  
H 0.568794 5.380431 -0.414438

H -6.622025000 -1.691232000 -2.368320000  
H -5.261323000 2.393531000 -2.575189000  
H -7.015396000 0.681596000 -3.017720000  
C 3.389817000 -0.646515000 -0.762276000  
C 3.128595000 -1.411304000 -1.911198000  
C 4.579447000 0.087106000 -0.692125000  
C 4.048614000 -1.459417000 -2.953202000  
C 5.495233000 0.042821000 -1.742961000  
C 5.236789000 -0.731254000 -2.871885000  
H 2.197048000 -1.981478000 -1.979973000  
H 4.789694000 0.709319000 0.182025000  
H 3.834476000 -2.064892000 -3.837552000  
H 6.415404000 0.628582000 -1.678331000  
H 5.957003000 -0.762541000 -3.692860000  
C 2.934866000 0.118527000 1.988697000  
C 2.549587000 1.362094000 2.504292000  
C 3.970187000 -0.589870000 2.615610000  
C 3.197141000 1.893205000 3.620295000  
C 4.613548000 -0.059090000 3.730468000  
C 4.228763000 1.185422000 4.233357000  
H 1.735152000 1.919827000 2.032992000  
H 4.276140000 -1.565808000 2.226478000  
H 2.888321000 2.865151000 4.011891000  
H 5.419263000 -0.619326000 4.210904000  
H 4.734341000 1.600810000 5.108451000

Int\_4, -4339.35904, NImag=0

Co 0.028546 0.152672 0.133254  
P -2.010262 -0.904663 -0.250987  
C -2.303219 -2.231658 1.010505  
C -1.182728 -2.816234 1.619053  
C -3.562665 -2.691792 1.423288  
C -1.291317 -3.789686 2.608084  
C -3.689474 -3.676042 2.401919  
C -2.554889 -4.222180 3.001554  
H -4.462578 -2.268875 0.969936  
H -0.380298 -4.194242 3.054107  
H -4.683760 -4.015270 2.700366  
H -2.651747 -4.985281 3.776789  
P 2.156878 -0.634146 0.426971  
C 1.963103 -2.376011 -0.128841  
C 0.811751 -3.049860 0.321000  
C 2.776434 -3.023321 -1.064847  
C 0.457596 -4.302974 -0.172903  
C 2.442034 -4.284839 -1.558097  
C 1.278541 -4.913464 -1.120528  
O 0.072516 -2.367913 1.254059  
H 3.680465 -2.524769 -1.423941  
H -0.459897 -4.787519 0.166927  
H 3.088512 -4.770780 -2.291605  
H 0.997432 -5.891276 -1.518439  
H -0.764764 2.953698 -2.646994  
C 1.322159 2.594656 -1.229183  
C 2.229019 2.836009 -0.180416  
C 1.740928 2.913201 -2.536158  
C 3.472216 3.406243 -0.426839  
C 2.979213 3.508852 -2.770293  
C 3.854467 3.767194 -1.719348  
H 1.952933 2.569456 0.838947  
H 1.112709 2.666816 -3.393939  
H 4.155805 3.568009 0.410947  
H 3.268400 3.746350 -3.797729  
H 4.832465 4.216706 -1.905389  
N 0.071969 1.980172 -0.972433  
C -0.862050 2.050219 -1.995237  
O -1.739731 1.239937 -2.203040  
C -1.144591 4.446370 1.047394  
C -2.474232 3.614155 0.997947  
C -0.851889 5.177798 -0.257361  
O -0.158741 3.426985 1.235720  
C -1.053540 5.422189 2.204702  
O -2.047588 2.362403 0.455817  
C -3.547604 4.186924 0.092399  
C -3.040638 3.354221 2.388458  
H -3.206501 4.249086 -0.948987  
H -3.858239 5.191243 0.419200  
H -4.433701 3.536362 0.104947  
H -2.277997 2.919524 3.050315  
H -3.870985 2.638815 2.314579  
H -3.428419 4.268519 2.860811  
H -1.863898 6.165519 2.162986  
H -0.099397 5.965509 2.165016  
H -1.102216 4.909533 3.172989  
H -0.949476 4.520287 -1.130901  
H 0.181962 5.550489 -0.241560

|                                    |              |              |              |                                     |           |           |           |
|------------------------------------|--------------|--------------|--------------|-------------------------------------|-----------|-----------|-----------|
| H                                  | -1.065333    | 6.045538     | -0.634280    | H                                   | -1.524006 | 6.034969  | -0.408462 |
| B                                  | -0.700100    | 2.257536     | 0.698664     | B                                   | -0.651498 | 2.238856  | 0.646762  |
| H                                  | -0.399966    | 1.237442     | 1.399625     | H                                   | -0.261689 | 1.253061  | 1.390810  |
| C                                  | -1.500191    | -2.192672    | -1.361735    | C                                   | -3.687015 | -0.209627 | -0.430437 |
| C                                  | -1.168063    | -3.497987    | -0.979944    | C                                   | -4.327589 | -0.110647 | -1.669131 |
| C                                  | -1.203764    | -1.770008    | -2.671259    | C                                   | -4.318378 | 0.313691  | 0.706283  |
| C                                  | -0.524845    | -4.356020    | -1.872882    | C                                   | -5.590039 | 0.474910  | -1.763075 |
| C                                  | -0.585433    | -2.638738    | -3.566321    | C                                   | -5.583337 | 0.885408  | 0.613626  |
| C                                  | -0.230341    | -3.929611    | -3.166738    | C                                   | -6.224640 | 0.966437  | -0.623957 |
| H                                  | -1.419955    | -3.856263    | 0.022031     | H                                   | -3.828953 | -0.477470 | -2.569097 |
| H                                  | -1.477189    | -0.755486    | -2.979818    | H                                   | -3.808216 | 0.273667  | 1.673637  |
| H                                  | -0.261004    | -5.367486    | -1.553423    | H                                   | -6.078942 | 0.548099  | -2.737432 |
| H                                  | -0.368740    | -2.300512    | -4.583023    | H                                   | -6.067137 | 1.281424  | 1.510566  |
| H                                  | 0.269114     | -4.604133    | -3.866368    | H                                   | -7.215863 | 1.420010  | -0.699834 |
| C                                  | -3.834884    | -0.583418    | -0.899906    | C                                   | -1.744933 | -1.953501 | -1.736276 |
| C                                  | -4.552592    | -1.565928    | -1.593963    | C                                   | -2.562478 | -3.049869 | -2.039116 |
| C                                  | -4.412028    | 0.673665     | -0.685338    | C                                   | -0.614708 | -1.710468 | -2.526892 |
| C                                  | -5.840068    | -1.298605    | -2.057273    | C                                   | -2.252761 | -3.887001 | -3.109124 |
| C                                  | -5.702096    | 0.932234     | -1.143469    | C                                   | -0.296667 | -2.553554 | -3.589396 |
| C                                  | -6.417900    | -0.049956    | -1.828541    | C                                   | -1.115892 | -3.643655 | -3.881292 |
| H                                  | -4.104616    | -2.548537    | -1.772303    | H                                   | -3.445074 | -3.255596 | -1.424973 |
| H                                  | -3.822862    | 1.444026     | -0.182263    | H                                   | 0.024334  | -0.849260 | -2.295655 |
| H                                  | -6.393141    | -2.069224    | -2.599776    | H                                   | -2.897920 | -4.738804 | -3.337768 |
| H                                  | -6.147831    | 1.916531     | -0.977993    | H                                   | 0.596903  | -2.360090 | -4.188159 |
| H                                  | -7.426298    | 0.160424     | -2.193482    | H                                   | -0.867546 | -4.307287 | -4.713165 |
| C                                  | 3.112848     | -0.703464    | -0.974338    | C                                   | 3.676659  | -0.123346 | -0.451420 |
| C                                  | 2.605025     | -1.417776    | -2.072307    | C                                   | 3.579028  | 0.110875  | -1.831576 |
| C                                  | 4.385740     | -0.135022    | -1.064018    | C                                   | 4.903604  | 0.089473  | 0.187324  |
| C                                  | 3.365350     | -1.581258    | -3.223962    | C                                   | 4.689579  | 0.522763  | -2.559977 |
| C                                  | 5.146134     | -0.298129    | -2.223956    | C                                   | 6.013936  | 0.512803  | -0.544428 |
| C                                  | 4.644058     | -1.023030    | -3.301220    | C                                   | 5.912089  | 0.724677  | -1.917247 |
| H                                  | 1.602665     | -1.856705    | -2.014983    | H                                   | 2.616511  | -0.025616 | -2.337837 |
| H                                  | 4.787382     | 0.449416     | -0.232256    | H                                   | 4.996896  | -0.071306 | 1.264450  |
| H                                  | 2.957576     | -2.146595    | -4.066156    | H                                   | 4.595076  | 0.706627  | -3.632838 |
| H                                  | 6.138430     | 0.156047     | -2.284167    | H                                   | 6.965792  | 0.677139  | -0.033589 |
| H                                  | 5.244299     | -1.148632    | -4.205568    | H                                   | 6.782186  | 1.058516  | -2.487441 |
| C                                  | 3.031015     | 0.150249     | 1.810832     | C                                   | 2.679019  | -0.795746 | 2.174449  |
| C                                  | 2.588845     | 1.300685     | 2.474675     | C                                   | 2.276527  | 0.187725  | 3.086274  |
| C                                  | 4.238794     | -0.442929    | 2.207093     | C                                   | 3.456550  | -1.871546 | 2.624224  |
| C                                  | 3.350553     | 1.858330     | 3.502171     | C                                   | 2.664233  | 0.107575  | 4.423457  |
| C                                  | 4.997850     | 0.114630     | 3.232341     | C                                   | 3.835228  | -1.953913 | 3.962475  |
| C                                  | 4.555334     | 1.269468     | 3.880211     | C                                   | 3.442092  | -0.962615 | 4.863044  |
| H                                  | 1.640310     | 1.764366     | 2.188641     | H                                   | 1.644702  | 1.014881  | 2.745162  |
| H                                  | 4.591897     | -1.350109    | 1.707925     | H                                   | 3.768716  | -2.648420 | 1.918993  |
| H                                  | 2.994138     | 2.757972     | 4.009203     | H                                   | 2.347409  | 0.881359  | 5.126384  |
| H                                  | 5.938194     | -0.355551    | 3.529914     | H                                   | 4.440597  | -2.796604 | 4.305203  |
| H                                  | 5.150747     | 1.706329     | 4.685589     | H                                   | 3.739091  | -1.028925 | 5.912434  |
| <b>*TS_6, -4339.34401, NImag=1</b> |              |              |              | <b>*Int_5, -4339.31198, NImag=0</b> |           |           |           |
| Co                                 | 0.191679000  | 0.359446000  | -0.133731000 | Co                                  | 0.013844  | -0.468188 | -0.398066 |
| P                                  | 2.469435000  | 0.319917000  | -0.015372000 | P                                   | -2.256947 | -0.730469 | -0.229811 |
| C                                  | 2.613146000  | -1.243674000 | -0.964279000 | C                                   | -2.832891 | 0.291361  | 1.208305  |
| C                                  | 1.862312000  | -2.346294000 | -0.510551000 | C                                   | -1.923960 | 0.547136  | 2.245235  |
| C                                  | 3.280229000  | -1.371740000 | -2.190578000 | C                                   | -4.087348 | 0.903730  | 1.288192  |
| C                                  | 1.785393000  | -3.531586000 | -1.237121000 | C                                   | -2.244058 | 1.362438  | 3.328404  |
| C                                  | 3.207429000  | -2.551095000 | -2.928984000 | C                                   | -4.432026 | 1.711439  | 2.371826  |
| C                                  | 2.457898000  | -3.626778000 | -2.453298000 | C                                   | -3.511172 | 1.937563  | 3.393566  |
| H                                  | 3.852003000  | -0.522609000 | -2.574214000 | H                                   | -4.807744 | 0.757574  | 0.478665  |
| H                                  | 1.182050000  | -4.361862000 | -0.860862000 | H                                   | -1.491202 | 1.569071  | 4.092319  |
| H                                  | 3.727798000  | -2.624844000 | -3.885071000 | H                                   | -5.420770 | 2.173375  | 2.411671  |
| H                                  | 2.386504000  | -4.548760000 | -3.035031000 | H                                   | -3.769666 | 2.580393  | 4.238163  |
| P                                  | -1.388650000 | -1.252507000 | -0.456577000 | P                                   | 1.930080  | -0.316264 | 0.805454  |
| C                                  | -1.124829000 | -2.709021000 | 0.651678000  | C                                   | 1.459075  | -0.784629 | 2.527551  |
| C                                  | 0.184144000  | -2.991444000 | 1.085986000  | C                                   | 0.141375  | -0.544647 | 2.958899  |
| C                                  | -2.154513000 | -3.508308000 | 1.169999000  | C                                   | 2.332541  | -1.429176 | 3.406641  |
| C                                  | 0.456767000  | -4.012824000 | 1.993444000  | C                                   | -0.303103 | -0.971257 | 4.209741  |
| C                                  | -1.894142000 | -4.535146000 | 2.073096000  | C                                   | 1.909915  | -1.837586 | 4.671488  |
| C                                  | -0.586755000 | -4.792083000 | 2.488944000  | C                                   | 0.591027  | -1.616947 | 5.062166  |
| O                                  | 1.225268000  | -2.174925000 | 0.698269000  | O                                   | -0.646252 | 0.087235  | 2.044343  |
| H                                  | -3.185913000 | -3.313679000 | 0.861818000  | H                                   | 3.358819  | -1.631436 | 3.088476  |
| H                                  | 1.491660000  | -4.174655000 | 2.305604000  | H                                   | -1.341291 | -0.813500 | 4.505625  |
| H                                  | -2.718402000 | -5.140656000 | 2.456342000  | H                                   | 2.607256  | -2.342490 | 5.342441  |
| H                                  | -0.379072000 | -5.592731000 | 3.201291000  | H                                   | 0.243584  | -1.955980 | 6.040705  |
| H                                  | 1.186033000  | 1.797806000  | 2.809710000  | H                                   | -0.146420 | -2.012878 | -4.019621 |
| C                                  | -1.151691000 | 1.113552000  | 2.534431000  | C                                   | 1.759702  | -1.037083 | -2.798993 |
| C                                  | -2.352043000 | 1.488333000  | 3.148633000  | C                                   | 2.519089  | 0.138424  | -2.665755 |
| C                                  | -0.561191000 | -0.110998000 | 2.865480000  | C                                   | 2.346042  | -2.132103 | -3.465176 |
| C                                  | -2.967716000 | 0.627879000  | 4.054713000  | C                                   | 3.812975  | 0.207837  | -3.176481 |
| C                                  | -1.179643000 | -0.964489000 | 3.777438000  | C                                   | 3.638347  | -2.051999 | -3.975743 |
| C                                  | -2.389571000 | -0.604356000 | 4.369959000  | C                                   | 4.385367  | -0.882799 | -3.832766 |
| H                                  | -2.806998000 | 2.448144000  | 2.893759000  | H                                   | 2.067413  | 1.001894  | -2.170130 |
| H                                  | 0.382614000  | -0.399616000 | 2.388819000  | H                                   | 1.792737  | -3.072410 | -3.537419 |
| H                                  | -3.909142000 | 0.924128000  | 4.521996000  | H                                   | 4.380903  | 1.137377  | -3.069337 |
| H                                  | -0.715172000 | -1.927099000 | 4.012019000  | H                                   | 4.074141  | -2.922430 | -4.473690 |
| H                                  | -2.880122000 | -1.275994000 | 5.074675000  | H                                   | 5.402064  | -0.822788 | -4.227302 |



|                                     |              |              |              |
|-------------------------------------|--------------|--------------|--------------|
| N                                   | -0.502296000 | 1.985362000  | 1.607170000  |
| C                                   | 0.808365000  | 2.361614000  | 1.920370000  |
| O                                   | 1.464141000  | 3.187988000  | 1.339549000  |
| C                                   | -3.032556000 | 3.088814000  | -0.817944000 |
| C                                   | -1.981646000 | 4.276016000  | -0.880438000 |
| C                                   | -4.453839000 | 3.526396000  | -0.506875000 |
| O                                   | -2.559387000 | 2.291661000  | 0.293617000  |
| C                                   | -3.027491000 | 2.198807000  | -2.048538000 |
| O                                   | -0.866243000 | 3.795891000  | -0.099532000 |
| C                                   | -2.460371000 | 5.547192000  | -0.196702000 |
| C                                   | -1.472463000 | 4.578070000  | -2.275081000 |
| H                                   | -2.778450000 | 5.355645000  | 0.835285000  |
| H                                   | -3.297589000 | 6.014675000  | -0.736305000 |
| H                                   | -1.633647000 | 6.270632000  | -0.158714000 |
| H                                   | -0.994370000 | 3.698673000  | -2.724556000 |
| H                                   | -0.721173000 | 5.379381000  | -2.228121000 |
| H                                   | -2.285433000 | 4.916216000  | -2.935051000 |
| H                                   | -3.339501000 | 2.745497000  | -2.949355000 |
| H                                   | -3.733880000 | 1.372373000  | -1.894990000 |
| H                                   | -2.031833000 | 1.765120000  | -2.211793000 |
| H                                   | -4.526424000 | 4.071521000  | 0.442973000  |
| H                                   | -5.101432000 | 2.643915000  | -0.436708000 |
| H                                   | -4.846656000 | 4.172107000  | -1.306521000 |
| B                                   | -1.257582000 | 2.648223000  | 0.516562000  |
| H                                   | -0.125039000 | 1.453765000  | -1.272944000 |
| C                                   | 3.525269000  | 0.037528000  | 1.463598000  |
| C                                   | 3.949620000  | -1.230877000 | 1.878862000  |
| C                                   | 3.875516000  | 1.155781000  | 2.241846000  |
| C                                   | 4.698918000  | -1.383068000 | 3.046096000  |
| C                                   | 4.627994000  | 0.998021000  | 3.404768000  |
| C                                   | 5.036113000  | -0.269976000 | 3.815078000  |
| H                                   | 3.713182000  | -2.114279000 | 1.279032000  |
| H                                   | 3.559642000  | 2.156196000  | 1.926916000  |
| H                                   | 5.030196000  | -2.378520000 | 3.348390000  |
| H                                   | 4.894529000  | 1.879477000  | 3.994235000  |
| H                                   | 5.626019000  | -0.389801000 | 4.726519000  |
| C                                   | 3.447620000  | 1.544213000  | -0.951739000 |
| C                                   | 4.845872000  | 1.455509000  | -1.056120000 |
| C                                   | 2.777356000  | 2.615469000  | -1.553852000 |
| C                                   | 5.557916000  | 2.416083000  | -1.769533000 |
| C                                   | 3.494971000  | 3.575911000  | -2.263951000 |
| C                                   | 4.880239000  | 3.478135000  | -2.376518000 |
| H                                   | 5.375859000  | 0.632060000  | -0.567744000 |
| H                                   | 1.688195000  | 2.683722000  | -1.441968000 |
| H                                   | 6.644919000  | 2.340637000  | -1.850770000 |
| H                                   | 2.965946000  | 4.414154000  | -2.722277000 |
| H                                   | 5.441409000  | 4.233687000  | -2.931540000 |
| C                                   | -3.211678000 | -1.098015000 | -0.442336000 |
| C                                   | -3.813048000 | -0.666848000 | 0.751037000  |
| C                                   | -4.014871000 | -1.285747000 | -1.574404000 |
| C                                   | -5.182223000 | -0.443655000 | 0.814979000  |
| C                                   | -5.388203000 | -1.054684000 | -1.508842000 |
| C                                   | -5.978970000 | -0.631940000 | -0.318262000 |
| H                                   | -3.193025000 | -0.506407000 | 1.634842000  |
| H                                   | -3.566965000 | -1.608910000 | -2.518993000 |
| H                                   | -5.630529000 | -0.109374000 | 1.754297000  |
| H                                   | -6.004803000 | -1.204847000 | -2.400581000 |
| H                                   | -7.053835000 | -0.448111000 | -0.272917000 |
| C                                   | -1.042369000 | -1.991912000 | -2.104687000 |
| C                                   | -0.323863000 | -1.239929000 | -3.044350000 |
| C                                   | -1.442873000 | -3.294876000 | -2.429895000 |
| C                                   | -0.013512000 | -1.789207000 | -4.289355000 |
| C                                   | -1.136931000 | -3.835553000 | -3.676024000 |
| C                                   | -0.418424000 | -3.084950000 | -4.605722000 |
| H                                   | -0.009394000 | -0.223241000 | -2.782103000 |
| H                                   | -1.996599000 | -3.892728000 | -1.700205000 |
| H                                   | 0.556271000  | -1.199160000 | -5.011865000 |
| H                                   | -1.454574000 | -4.852408000 | -3.920962000 |
| H                                   | -0.172180000 | -3.512517000 | -5.581356000 |
| <b>Int_1</b> , -3927.78980, NImag=0 |              |              |              |
| Co                                  | 0.001205     | -1.018432    | -0.294750    |
| P                                   | 1.069901     | 0.842278     | -0.157352    |
| C                                   | 1.695461     | 0.707032     | 1.572312     |
| C                                   | 0.969717     | -0.152394    | 2.406820     |
| C                                   | 2.908951     | 1.209513     | 2.049988     |
| C                                   | 1.447668     | -0.566873    | 3.642547     |
| C                                   | 3.386855     | 0.837198     | 3.306841     |
| C                                   | 2.670027     | -0.063746    | 4.091951     |
| H                                   | 3.513253     | 1.858023     | 1.410220     |
| H                                   | 0.873312     | -1.283928    | 4.231502     |
| H                                   | 4.344787     | 1.226105     | 3.658680     |
| H                                   | 3.064094     | -0.387529    | 5.057334     |
| P                                   | -2.190259    | -0.596254    | -0.279152    |
| C                                   | -2.474034    | 0.069242     | 1.402319     |

|                                  |           |           |           |
|----------------------------------|-----------|-----------|-----------|
| N                                | 0.476901  | -1.115418 | -2.243657 |
| C                                | -0.461614 | -1.770933 | -2.971062 |
| O                                | -1.584331 | -2.082441 | -2.588473 |
| C                                | 0.167558  | 3.749833  | -1.207075 |
| C                                | -0.948576 | 3.721011  | -0.107339 |
| C                                | -0.384078 | 3.896186  | -2.615576 |
| O                                | 0.732911  | 2.417649  | -1.111510 |
| C                                | 1.270760  | 4.756300  | -0.960828 |
| O                                | -1.246978 | 2.309135  | -0.006543 |
| C                                | -2.224751 | 4.450031  | -0.472382 |
| C                                | -0.456809 | 4.162444  | 1.261110  |
| H                                | -2.687563 | 4.039609  | -1.378426 |
| H                                | -2.037279 | 5.522443  | -0.631850 |
| H                                | -2.954841 | 4.353033  | 0.343131  |
| H                                | 0.454286  | 3.618766  | 1.548441  |
| H                                | -1.230865 | 3.944816  | 2.010004  |
| H                                | -0.239645 | 5.239673  | 1.296655  |
| H                                | 0.872357  | 5.781961  | -0.948062 |
| H                                | 2.020653  | 4.697983  | -1.761843 |
| H                                | 1.788291  | 4.569756  | -0.011615 |
| H                                | -1.182979 | 3.168287  | -2.810995 |
| H                                | 0.417450  | 3.713171  | -3.343609 |
| H                                | -0.787171 | 4.902609  | -2.796606 |
| B                                | -0.183816 | 1.587432  | -0.502648 |
| H                                | 0.041141  | -1.811695 | 0.409569  |
| C                                | -2.878052 | -2.387884 | 0.279818  |
| C                                | -2.151430 | -3.533611 | -0.068970 |
| C                                | -4.045228 | -2.538044 | 1.042634  |
| C                                | -2.592211 | -4.796161 | 0.318569  |
| C                                | -4.486453 | -3.803520 | 1.429200  |
| C                                | -3.761887 | -4.936487 | 1.065297  |
| H                                | -1.232786 | -3.421186 | -0.646123 |
| H                                | -4.616512 | -1.659090 | 1.353285  |
| H                                | -2.013212 | -5.678960 | 0.037274  |
| H                                | -5.397573 | -3.900067 | 2.024608  |
| H                                | -4.103561 | -5.928381 | 1.371055  |
| C                                | -3.382463 | -0.161851 | -1.559370 |
| C                                | -2.886529 | 0.778453  | -2.469338 |
| C                                | -4.689773 | -0.633576 | -1.719487 |
| C                                | -3.691327 | 1.271353  | -3.492274 |
| C                                | -5.495749 | -0.143126 | -2.747398 |
| C                                | -5.003024 | 0.816203  | -3.629905 |
| H                                | -1.842384 | 1.095037  | -2.386729 |
| H                                | -5.084152 | -1.400186 | -1.046988 |
| H                                | -3.286564 | 2.000977  | -4.198610 |
| H                                | -6.514190 | -0.521980 | -2.862147 |
| H                                | -5.634742 | 1.196143  | -4.436283 |
| C                                | 3.232991  | -1.537280 | 0.402184  |
| C                                | 4.583350  | -1.359758 | 0.738499  |
| C                                | 2.842933  | -2.715958 | -0.246857 |
| C                                | 5.521261  | -2.342444 | 0.427723  |
| C                                | 3.782312  | -3.699061 | -0.548027 |
| C                                | 5.122902  | -3.514031 | -0.215430 |
| H                                | 4.907691  | -0.450321 | 1.251286  |
| H                                | 1.792200  | -2.845170 | -0.524175 |
| H                                | 6.570302  | -2.191356 | 0.693159  |
| H                                | 3.464463  | -4.609165 | -1.062397 |
| H                                | 5.860681  | -4.281434 | -0.461378 |
| C                                | 2.848331  | 1.249033  | 1.085967  |
| C                                | 2.548004  | 2.069412  | 2.181483  |
| C                                | 3.800775  | 1.693728  | 0.156521  |
| C                                | 3.190485  | 3.296640  | 2.349167  |
| C                                | 4.445566  | 2.915013  | 0.328251  |
| C                                | 4.143206  | 3.722509  | 1.425774  |
| H                                | 1.807419  | 1.747521  | 2.920087  |
| H                                | 4.050230  | 1.065898  | -0.701888 |
| H                                | 2.945369  | 3.920116  | 3.212759  |
| H                                | 5.191975  | 3.238305  | -0.401711 |
| H                                | 4.650633  | 4.680585  | 1.561136  |
| <b>B'</b> , -3927.80135, NImag=0 |           |           |           |
| Co                               | 0.029997  | 0.404272  | -0.378558 |
| P                                | 2.174967  | 0.319060  | -0.042321 |
| C                                | 2.648697  | -0.539504 | -1.611884 |
| C                                | 1.629817  | -1.301006 | -2.189835 |
| C                                | 3.873471  | -0.485019 | -2.287914 |
| C                                | 1.776263  | -1.973064 | -3.395934 |
| C                                | 4.049488  | -1.155185 | -3.498851 |
| C                                | 3.004996  | -1.895286 | -4.053115 |
| H                                | 4.692794  | 0.104036  | -1.865764 |
| H                                | 0.939859  | -2.537531 | -3.812591 |
| H                                | 5.008241  | -1.093451 | -4.018190 |
| H                                | 3.139353  | -2.408302 | -5.007583 |
| P                                | -1.878498 | -0.564637 | -0.004619 |
| C                                | -1.308209 | -2.291235 | -0.231935 |

|                                                |           |           |           |                                                |           |           |           |
|------------------------------------------------|-----------|-----------|-----------|------------------------------------------------|-----------|-----------|-----------|
| C                                              | -1.418345 | -0.010865 | 2.325503  | C                                              | -0.121062 | -2.464392 | -0.958484 |
| C                                              | -3.652951 | 0.714094  | 1.802567  | C                                              | -1.872944 | -3.414188 | 0.381322  |
| C                                              | -1.538479 | 0.536368  | 3.603670  | C                                              | 0.505212  | -3.699558 | -1.065406 |
| C                                              | -3.783014 | 1.267511  | 3.072502  | C                                              | -1.263764 | -4.665538 | 0.283587  |
| C                                              | -2.720388 | 1.175429  | 3.969679  | C                                              | -0.077349 | -4.801548 | -0.432915 |
| O                                              | -0.246605 | -0.645637 | 1.914321  | O                                              | 0.397635  | -1.293176 | -1.519699 |
| H                                              | -4.473744 | 0.802653  | 1.085130  | H                                              | -2.791648 | -3.293363 | 0.963160  |
| H                                              | -0.709636 | 0.480425  | 4.308958  | H                                              | 1.448036  | -3.805472 | -1.602958 |
| H                                              | -4.707960 | 1.771059  | 3.359639  | H                                              | -1.708736 | -5.530544 | 0.779281  |
| H                                              | -2.804665 | 1.605282  | 4.970206  | H                                              | 0.418081  | -5.772553 | -0.497674 |
| H                                              | 0.105258  | -1.034951 | -1.749191 | H                                              | 0.155388  | 3.399603  | 2.062742  |
| C                                              | 3.546650  | -2.519717 | -0.382655 | C                                              | -1.317912 | 2.801873  | 0.073951  |
| C                                              | 3.975106  | -1.634033 | 0.625167  | C                                              | -1.533159 | 2.789996  | -1.317954 |
| C                                              | 4.460813  | -2.847180 | -1.404401 | C                                              | -2.213660 | 3.525528  | 0.882442  |
| C                                              | 5.239022  | -1.051886 | 0.575758  | C                                              | -2.595404 | 3.483989  | -1.884777 |
| C                                              | 5.724875  | -2.269312 | -1.441431 | C                                              | -3.265152 | 4.235822  | 0.304385  |
| C                                              | 6.121221  | -1.354556 | -0.461933 | C                                              | -3.464775 | 4.220726  | -1.076827 |
| H                                              | 3.300523  | -1.436155 | 1.460803  | H                                              | -0.826360 | 2.226956  | -1.940815 |
| H                                              | 4.144052  | -3.557812 | -2.171649 | H                                              | -2.100313 | 3.500365  | 1.968961  |
| H                                              | 5.543249  | -0.359549 | 1.367225  | H                                              | -2.745761 | 3.453863  | -2.966957 |
| H                                              | 6.412020  | -2.531662 | -2.251182 | H                                              | -3.951019 | 4.793115  | 0.947981  |
| H                                              | 7.113036  | -0.898146 | -0.497794 | H                                              | -4.296879 | 4.772298  | -1.520371 |
| N                                              | 2.305397  | -3.115331 | -0.367807 | N                                              | -0.277219 | 2.021438  | 0.573170  |
| C                                              | 1.185923  | -2.526736 | -0.219620 | C                                              | 0.402073  | 2.378655  | 1.676271  |
| O                                              | -0.001052 | -2.941032 | -0.086796 | O                                              | 1.254912  | 1.684854  | 2.234588  |
| C                                              | -3.160075 | -2.147840 | -0.354723 | C                                              | -3.415669 | -0.466927 | -0.997532 |
| C                                              | -4.299688 | -2.385864 | 0.423443  | C                                              | -3.751296 | -1.409366 | -1.979029 |
| C                                              | -2.732390 | -3.128258 | -1.260926 | C                                              | -4.222585 | 0.673685  | -0.850827 |
| C                                              | -5.008237 | -3.578009 | 0.286454  | C                                              | -4.875206 | -1.222860 | -2.784331 |
| C                                              | -3.450945 | -4.313249 | -1.405087 | C                                              | -5.345352 | 0.854673  | -1.652051 |
| C                                              | -4.588437 | -4.540505 | -0.631702 | C                                              | -5.676152 | -0.093402 | -2.622438 |
| H                                              | -4.637840 | -1.640640 | 1.148547  | H                                              | -3.132845 | -2.302015 | -2.112323 |
| H                                              | -1.819301 | -2.960557 | -1.837536 | H                                              | -3.965729 | 1.430156  | -0.100484 |
| H                                              | -5.893358 | -3.756202 | 0.901784  | H                                              | -5.128058 | -1.969680 | -3.541146 |
| H                                              | -3.108246 | -5.070250 | -2.114016 | H                                              | -5.961370 | 1.748016  | -1.521331 |
| H                                              | -5.144685 | -5.474986 | -0.736932 | H                                              | -6.556089 | 0.050346  | -3.253863 |
| C                                              | -3.162130 | 0.520867  | -1.356844 | C                                              | -2.503072 | -0.512109 | 1.716851  |
| C                                              | -3.172888 | 1.906803  | -1.140428 | C                                              | -1.600120 | -0.123621 | 2.717169  |
| C                                              | -3.832026 | 0.010509  | -2.479321 | C                                              | -3.816007 | -0.851346 | 2.073824  |
| C                                              | -3.851165 | 2.755076  | -2.012826 | C                                              | -2.001856 | -0.084169 | 4.050980  |
| C                                              | -4.501010 | 0.863106  | -3.354886 | C                                              | -4.213725 | -0.809569 | 3.409259  |
| C                                              | -4.517053 | 2.238060  | -3.123519 | C                                              | -3.308521 | -0.425470 | 4.399292  |
| H                                              | -2.654200 | 2.330923  | -0.275616 | H                                              | -0.577810 | 0.153866  | 2.441304  |
| H                                              | -3.838976 | -1.066415 | -2.668066 | H                                              | -4.534610 | -1.145577 | 1.303030  |
| H                                              | -3.854707 | 3.830976  | -1.819205 | H                                              | -1.287546 | 0.224578  | 4.817962  |
| H                                              | -5.020044 | 0.446079  | -4.221083 | H                                              | -5.238851 | -1.076320 | 3.677896  |
| H                                              | -5.048298 | 2.904778  | -3.806628 | H                                              | -3.625422 | -0.388631 | 5.444499  |
| C                                              | 0.204918  | 2.461275  | -0.154942 | C                                              | 3.345435  | 1.715538  | 0.007933  |
| C                                              | -0.035067 | 3.110465  | -1.375615 | C                                              | 3.450024  | 2.540033  | -1.122341 |
| C                                              | -0.302097 | 3.027950  | 1.022807  | C                                              | 4.029388  | 2.076082  | 1.176046  |
| C                                              | -0.749684 | 4.304607  | -1.413454 | C                                              | 4.252906  | 3.677651  | -1.099112 |
| C                                              | -1.031362 | 4.216443  | 0.981142  | C                                              | 4.832740  | 3.214594  | 1.196514  |
| C                                              | -1.252757 | 4.860263  | -0.235977 | C                                              | 4.951361  | 4.014865  | 0.060622  |
| H                                              | 0.346099  | 2.677209  | -2.305503 | H                                              | 2.892361  | 2.289554  | -2.031006 |
| H                                              | -0.118240 | 2.545401  | 1.987332  | H                                              | 3.910110  | 1.474260  | 2.079479  |
| H                                              | -0.923851 | 4.800140  | -2.371699 | H                                              | 4.327537  | 4.307578  | -1.988659 |
| H                                              | -1.417497 | 4.646037  | 1.908916  | H                                              | 5.362259  | 3.483969  | 2.113440  |
| H                                              | -1.815734 | 5.796294  | -0.267177 | H                                              | 5.579252  | 4.908710  | 0.081947  |
| C                                              | 2.527161  | 1.190579  | -1.193298 | C                                              | 2.773029  | -0.901193 | 1.190880  |
| C                                              | 2.967345  | 0.191818  | -2.068491 | C                                              | 1.807418  | -1.633824 | 1.889009  |
| C                                              | 3.218879  | 2.409975  | -1.131132 | C                                              | 4.128278  | -1.202231 | 1.376719  |
| C                                              | 4.097534  | 0.400016  | -2.857097 | C                                              | 2.184856  | -2.649095 | 2.764714  |
| C                                              | 4.353024  | 2.610721  | -1.913950 | C                                              | 4.506470  | -2.211956 | 2.259918  |
| C                                              | 4.793604  | 1.604225  | -2.775287 | C                                              | 3.536118  | -2.936901 | 2.954033  |
| H                                              | 2.410280  | -0.748065 | -2.121129 | H                                              | 0.752081  | -1.392978 | 1.719917  |
| H                                              | 2.862508  | 3.209849  | -0.474112 | H                                              | 4.894973  | -0.643587 | 0.830498  |
| H                                              | 4.436272  | -0.388514 | -3.532396 | H                                              | 1.418704  | -3.213847 | 3.302015  |
| H                                              | 4.892682  | 3.559013  | -1.856584 | H                                              | 5.565838  | -2.437665 | 2.404878  |
| H                                              | 5.682644  | 1.764370  | -3.390063 | H                                              | 3.836857  | -3.729821 | 3.643218  |
| <b><sup>1</sup>Int_4, -4339.31497, NImag=0</b> |           |           |           | <b><sup>1</sup>Int_3, -4339.34567, NImag=0</b> |           |           |           |
| Co                                             | -0.030459 | 0.133273  | 0.060190  | Co                                             | 0.039181  | -0.409953 | -0.068521 |
| P                                              | -1.963712 | -0.985429 | -0.455498 | P                                              | 1.375165  | 1.326682  | -0.418161 |
| C                                              | -2.526579 | -1.084595 | 1.306227  | C                                              | 2.289388  | 1.219420  | 1.197225  |
| C                                              | -1.482615 | -1.180165 | 2.227720  | C                                              | 1.606226  | 0.604708  | 2.246430  |
| C                                              | -3.826401 | -1.017528 | 1.817610  | C                                              | 3.629453  | 1.560215  | 1.420459  |
| C                                              | -1.667503 | -1.199242 | 3.600320  | C                                              | 2.200521  | 0.293880  | 3.460427  |
| C                                              | -4.045106 | -1.031768 | 3.197835  | C                                              | 4.244399  | 1.283709  | 2.641751  |
| C                                              | -2.975145 | -1.121759 | 4.086754  | C                                              | 3.533517  | 0.647604  | 3.659358  |
| H                                              | -4.674034 | -0.945542 | 1.130598  | H                                              | 4.206315  | 2.028852  | 0.619032  |
| H                                              | -0.804600 | -1.263482 | 4.265986  | H                                              | 1.629787  | -0.244291 | 4.218938  |
| H                                              | -5.065774 | -0.969167 | 3.581788  | H                                              | 5.292184  | 1.552756  | 2.793104  |
| H                                              | -3.152339 | -1.124172 | 5.164146  | H                                              | 4.022784  | 0.403598  | 4.605025  |
| P                                              | 2.058623  | -0.559039 | 0.215395  | P                                              | -2.147207 | -0.020746 | 0.416058  |
| C                                              | 1.740515  | -2.240814 | 0.878260  | C                                              | -1.959063 | 1.075853  | 1.867038  |

|   |           |           |           |   |           |           |           |
|---|-----------|-----------|-----------|---|-----------|-----------|-----------|
| C | 0.540079  | -2.367087 | 1.587713  | C | -0.733744 | 1.041568  | 2.544887  |
| C | 2.518934  | -3.390008 | 0.710668  | C | -2.941700 | 1.967145  | 2.316906  |
| C | 0.097344  | -3.573109 | 2.109040  | C | -0.521977 | 1.814092  | 3.686548  |
| C | 2.093094  | -4.618851 | 1.218390  | C | -2.733825 | 2.767039  | 3.436807  |
| C | 0.888608  | -4.708212 | 1.912416  | C | -1.528620 | 2.670963  | 4.128481  |
| O | -0.191886 | -1.180050 | 1.681529  | O | 0.269906  | 0.234277  | 1.993366  |
| H | 3.461750  | -3.322840 | 0.159939  | H | -3.877629 | 2.045733  | 1.756041  |
| H | -0.859190 | -3.638612 | 2.630755  | H | 0.432271  | 1.788053  | 4.210569  |
| H | 2.704884  | -5.510707 | 1.066874  | H | -3.508163 | 3.462114  | 3.766831  |
| H | 0.545371  | -5.669987 | 2.299541  | H | -1.350906 | 3.283056  | 5.015456  |
| H | -0.567316 | 2.786900  | -2.846283 | H | -0.743485 | -0.165749 | -3.874905 |
| C | 1.429910  | 2.080032  | -1.551681 | C | -1.132174 | -1.935418 | -2.243209 |
| C | 2.306488  | 2.814655  | -0.740944 | C | -0.628229 | -3.236466 | -2.078141 |
| C | 1.867491  | 1.683266  | -2.827265 | C | -2.461377 | -1.783681 | -2.676222 |
| C | 3.566546  | 3.168100  | -1.220698 | C | -1.442006 | -4.342055 | -2.309353 |
| C | 3.121223  | 2.056002  | -3.303747 | C | -3.269736 | -2.895042 | -2.909482 |
| C | 3.976160  | 2.812129  | -2.505263 | C | -2.769006 | -4.181157 | -2.716596 |
| H | 1.984234  | 3.139696  | 0.245451  | H | 0.411673  | -3.361441 | -1.773219 |
| H | 1.218894  | 1.053255  | -3.443515 | H | -2.861781 | -0.775513 | -2.814826 |
| H | 4.233093  | 3.746494  | -0.575242 | H | -1.030776 | -5.346875 | -2.178289 |
| H | 3.435269  | 1.733581  | -4.299500 | H | -4.303474 | -2.749490 | -3.234578 |
| H | 4.963571  | 3.101631  | -2.872642 | H | -3.404122 | -5.053194 | -2.889411 |
| N | 0.099797  | 1.710130  | -1.157510 | N | -0.345561 | -0.799784 | -1.956351 |
| C | -0.779569 | 1.844976  | -2.280910 | C | -0.318094 | 0.160401  | -2.892807 |
| O | -1.633495 | 1.079283  | -2.620854 | O | 0.144398  | 1.296035  | -2.777908 |
| O | -0.949167 | 4.525714  | 0.723973  | C | 3.376602  | -3.040813 | -0.030644 |
| C | -2.322254 | 3.782950  | 0.650639  | C | 2.939850  | -3.126431 | 1.466243  |
| C | -0.628152 | 5.272213  | -0.564779 | C | 4.444703  | -1.984015 | -0.261776 |
| O | -0.035885 | 3.432830  | 0.856675  | O | 2.162252  | -2.594628 | -0.672615 |
| C | -0.790158 | 5.443124  | 1.919068  | C | 3.794828  | -4.360397 | -0.644345 |
| O | -1.981647 | 2.611923  | -0.085990 | O | 1.939097  | -2.094899 | 1.549131  |
| C | -3.409425 | 4.530688  | -0.095134 | C | 4.039619  | -2.834875 | 2.464660  |
| C | -2.817178 | 3.355034  | 2.028881  | C | 2.248851  | -4.441622 | 1.798447  |
| H | -3.136927 | 4.697545  | -1.144885 | H | 4.440313  | -1.820838 | 2.342234  |
| H | -3.617333 | 5.505393  | 0.371444  | H | 4.866970  | -3.552913 | 2.361431  |
| H | -4.344720 | 3.952783  | -0.087028 | H | 3.652451  | -2.917519 | 3.490051  |
| H | -2.029658 | 2.828313  | 2.587620  | H | 1.461302  | -4.673025 | 1.066678  |
| H | -3.663579 | 2.662264  | 1.914560  | H | 1.773060  | -4.363853 | 2.785097  |
| H | -3.159748 | 4.206298  | 2.635280  | H | 2.953879  | -5.284700 | 1.825807  |
| H | -1.559446 | 6.229968  | 1.920716  | H | 4.662037  | -4.782791 | -0.115217 |
| H | 0.190979  | 5.937388  | 1.894207  | H | 4.083369  | -4.215700 | -1.694188 |
| H | -0.858015 | 4.889719  | 2.863763  | H | 2.984031  | -5.098750 | -0.622042 |
| H | -0.776366 | 4.631060  | -1.445614 | H | 4.147266  | -1.013701 | 0.164447  |
| H | 0.425054  | 5.585353  | -0.555100 | H | 4.598340  | -1.839078 | -1.338759 |
| H | -1.247862 | 6.171863  | -0.691898 | H | 5.408248  | -2.275968 | 0.179675  |
| B | -0.619386 | 2.289099  | 0.228283  | B | 1.407304  | -1.909575 | 0.275316  |
| H | -0.495130 | 1.329815  | 1.089833  | H | 0.088322  | -1.997789 | 0.243080  |
| C | -3.538293 | -0.630581 | -1.319262 | C | 2.744963  | 1.333144  | -1.631175 |
| C | -4.042730 | -1.463169 | -2.325094 | C | 2.975398  | 0.176737  | -2.384155 |
| C | -4.213182 | 0.564533  | -1.026349 | C | 3.552527  | 2.458960  | -1.841747 |
| C | -5.209537 | -1.119268 | -3.008909 | C | 4.001304  | 0.146701  | -3.326504 |
| C | -5.382000 | 0.898076  | -1.702858 | C | 4.581055  | 2.424206  | -2.782659 |
| C | -5.886221 | 0.057387  | -2.696790 | C | 4.806668  | 1.267312  | -3.527852 |
| H | -3.522502 | -2.388293 | -2.585772 | H | 2.342848  | -0.701574 | -2.224643 |
| H | -3.792013 | 1.248779  | -0.285866 | H | 3.370445  | 3.376702  | -1.274190 |
| H | -5.589100 | -1.779461 | -3.792649 | H | 4.168103  | -0.760112 | -3.913838 |
| H | -5.897213 | 1.831686  | -1.461917 | H | 5.203778  | 3.308552  | -2.938533 |
| H | -6.800232 | 0.324532  | -3.232611 | H | 5.606987  | 1.242470  | -4.271511 |
| C | -1.735526 | -2.793193 | -0.775758 | C | 0.818880  | 3.086761  | -0.390438 |
| C | -0.562330 | -3.206364 | -1.411274 | C | 0.486036  | 3.693352  | 0.829425  |
| C | -2.645564 | -3.764443 | -0.334704 | C | 0.603679  | 3.811709  | -1.575132 |
| C | -0.292439 | -4.559845 | -1.607183 | C | -0.085938 | 4.963922  | 0.870125  |
| C | -2.377776 | -5.118463 | -0.523986 | C | 0.049564  | 5.089085  | -1.529902 |
| C | -1.199581 | -5.518503 | -1.158482 | C | -0.313795 | 5.665220  | -0.312002 |
| H | 0.151540  | -2.433242 | -1.717479 | H | 0.679822  | 3.175121  | 1.770939  |
| H | -3.568990 | -3.457580 | 0.167187  | H | 0.857254  | 3.363471  | -2.535625 |
| H | 0.636097  | -4.866383 | -2.096683 | H | -0.345738 | 5.406576  | 1.835217  |
| H | -3.090117 | -5.868281 | -0.170559 | H | -0.106209 | 5.638190  | -2.462279 |
| H | -0.988049 | -6.581559 | -1.298133 | H | -0.760984 | 6.661799  | -0.284588 |
| C | 3.348536  | -0.846824 | -1.052596 | C | -3.257679 | 0.944947  | -0.666974 |
| C | 4.558017  | -0.141090 | -1.074557 | C | -2.682886 | 2.052963  | -1.308077 |
| C | 3.068686  | -1.723941 | -2.114447 | C | -4.580655 | 0.592479  | -0.964371 |
| C | 5.466058  | -0.317929 | -2.118959 | C | -3.424257 | 2.808186  | -2.211120 |
| C | 3.978012  | -1.907307 | -3.150463 | C | -5.317719 | 1.347443  | -1.877482 |
| C | 5.183784  | -1.201371 | -3.157087 | C | -4.744187 | 2.455914  | -2.499612 |
| H | 4.792374  | 0.567035  | -0.276204 | H | -1.633895 | 2.301617  | -1.119151 |
| H | 2.123543  | -2.275433 | -2.121888 | H | -5.035079 | -0.285037 | -0.495937 |
| H | 6.400877  | 0.248620  | -2.119699 | H | -2.957728 | 3.664258  | -2.704509 |
| H | 3.743667  | -2.602326 | -3.960400 | H | -6.347667 | 1.062954  | -2.106687 |
| H | 5.897247  | -1.339832 | -3.972865 | H | -5.323363 | 3.040165  | -3.218711 |
| C | 3.027701  | 0.148854  | 1.631661  | C | -3.226196 | -1.363710 | 1.071614  |
| C | 2.500447  | 1.245004  | 2.322071  | C | -4.303991 | -1.117759 | 1.935555  |
| C | 4.212145  | -0.441371 | 2.097279  | C | -2.959995 | -2.683485 | 0.687709  |
| C | 3.158445  | 1.761484  | 3.439456  | C | -5.100783 | -2.164789 | 2.392970  |

|   |          |           |          |   |           |           |          |
|---|----------|-----------|----------|---|-----------|-----------|----------|
| C | 4.867002 | 0.071159  | 3.214143 | C | -3.762707 | -3.730919 | 1.138699 |
| C | 4.342602 | 1.178226  | 3.885346 | C | -4.833824 | -3.474714 | 1.991909 |
| H | 1.559824 | 1.692496  | 1.981802 | H | -4.527672 | -0.097728 | 2.259460 |
| H | 4.627408 | -1.312283 | 1.579656 | H | -2.112161 | -2.893768 | 0.029838 |
| H | 2.737890 | 2.623099  | 3.963845 | H | -5.934487 | -1.956545 | 3.067972 |
| H | 5.789589 | -0.396919 | 3.566620 | H | -3.541857 | -4.752736 | 0.820388 |
| H | 4.857098 | 1.580051  | 4.761785 | H | -5.459900 | -4.295296 | 2.350624 |

<sup>1</sup>Int\_5, -4339.31720, NImag=0

|    |           |           |           |
|----|-----------|-----------|-----------|
| Co | 0.050665  | 0.266259  | -0.304624 |
| P  | 2.258293  | 0.510788  | -0.199964 |
| C  | 2.418565  | 0.187967  | 1.616595  |
| C  | 1.283580  | 0.485934  | 2.375925  |
| C  | 3.511182  | -0.381749 | 2.274291  |
| C  | 1.189719  | 0.208970  | 3.732698  |
| C  | 3.452354  | -0.650114 | 3.643035  |
| C  | 2.295139  | -0.361142 | 4.366149  |
| H  | 4.409466  | -0.633962 | 1.703432  |
| H  | 0.261309  | 0.408128  | 4.271385  |
| H  | 4.309228  | -1.104515 | 4.144610  |
| H  | 2.240129  | -0.596553 | 5.431281  |
| P  | -1.963663 | 1.120093  | -0.162195 |
| C  | -1.657293 | 2.324223  | 1.193350  |
| C  | -0.533291 | 2.097837  | 1.996677  |
| C  | -2.452302 | 3.437842  | 1.468181  |
| C  | -0.186049 | 2.955688  | 3.036446  |
| C  | -2.125824 | 4.308994  | 2.506708  |
| C  | -0.994161 | 4.065796  | 3.282737  |
| O  | 0.206408  | 0.983645  | 1.645072  |
| H  | -3.332267 | 3.632341  | 0.849090  |
| H  | 0.707278  | 2.774015  | 3.635797  |
| H  | -2.750207 | 5.182237  | 2.703968  |
| H  | -0.724526 | 4.749673  | 4.090360  |
| H  | 0.702003  | -0.373038 | -4.057263 |
| C  | -0.614531 | -1.711516 | -2.477330 |
| C  | -0.014620 | -2.662760 | -3.326524 |
| C  | -1.898204 | -1.998995 | -1.990819 |
| C  | -0.691068 | -3.823602 | -3.693576 |
| C  | -2.569863 | -3.160328 | -2.354425 |
| C  | -1.974940 | -4.084023 | -3.215222 |
| H  | 1.009854  | -2.504076 | -3.671833 |
| H  | -2.356474 | -1.305431 | -1.288706 |
| H  | -0.195672 | -4.544428 | -4.349574 |
| H  | -3.570449 | -3.344785 | -1.951181 |
| H  | -2.498696 | -4.999594 | -3.498637 |
| N  | 0.056202  | -0.537328 | -2.100612 |
| C  | 0.850826  | 0.034714  | -3.026721 |
| O  | 1.661815  | 0.940189  | -2.837172 |
| C  | 0.204672  | -3.712529 | 1.219714  |
| C  | -0.971707 | -3.091896 | 2.036241  |
| C  | 1.519776  | -3.686914 | 1.984311  |
| O  | 0.335151  | -2.777240 | 0.128693  |
| C  | -0.064781 | -5.086333 | 0.644846  |
| O  | -0.818495 | -1.679611 | 1.754416  |
| C  | -0.893856 | -3.296702 | 3.534280  |
| C  | -2.331871 | -3.515353 | 1.505748  |
| H  | 0.023337  | -2.870617 | 3.960532  |
| H  | -0.930734 | -4.365950 | 3.792262  |
| H  | -1.748421 | -2.807158 | 4.023648  |
| H  | -2.392584 | -3.366937 | 0.417941  |
| H  | -3.117201 | -2.904454 | 1.970151  |
| H  | -2.546779 | -4.571810 | 1.722670  |
| H  | -0.276307 | -5.818691 | 1.438702  |
| H  | 0.815241  | -5.439684 | 0.089215  |
| H  | -0.909146 | -5.072102 | -0.055529 |
| H  | 1.703563  | -2.691682 | 2.416192  |
| H  | 2.349094  | -3.909882 | 1.298318  |
| H  | 1.542352  | -4.426523 | 2.798139  |
| B  | -0.154318 | -1.549538 | 0.537182  |
| H  | 0.076281  | 1.771047  | -0.791176 |
| C  | 3.012574  | 2.178082  | -0.331286 |
| C  | 3.583214  | 2.627272  | -1.531876 |
| C  | 2.956548  | 3.060274  | 0.757222  |
| C  | 4.089962  | 3.920883  | -1.628709 |
| C  | 3.451945  | 4.358596  | 0.651589  |
| C  | 4.023028  | 4.793245  | -0.542419 |
| H  | 3.614286  | 1.963470  | -2.395996 |
| H  | 2.527249  | 2.736865  | 1.709115  |
| H  | 4.534485  | 4.252742  | -2.570130 |
| H  | 3.394033  | 5.030027  | 1.511718  |
| H  | 4.415827  | 5.809315  | -0.626714 |
| C  | 3.476410  | -0.640299 | -0.917731 |
| C  | 3.026291  | -1.899416 | -1.338180 |
| C  | 4.838030  | -0.324198 | -1.029803 |

<sup>1</sup>Int\_6, -4339.33251, NImag=0

|    |           |           |           |
|----|-----------|-----------|-----------|
| Co | 0.041096  | -0.080099 | -0.497583 |
| P  | -2.025213 | -0.685157 | -0.364430 |
| C  | -2.290891 | -0.411622 | 1.442152  |
| C  | -1.134976 | -0.268572 | 2.241183  |
| C  | -3.533164 | -0.216937 | 2.057470  |
| C  | -1.226356 | 0.094920  | 3.582331  |
| C  | -3.638559 | 0.111462  | 3.407350  |
| C  | -2.479529 | 0.275141  | 4.161460  |
| H  | -4.442581 | -0.298385 | 1.459117  |
| H  | -0.325680 | 0.287552  | 4.163544  |
| H  | -4.620805 | 0.260047  | 3.859553  |
| H  | -2.541770 | 0.570671  | 5.211177  |
| P  | 2.050563  | 0.669860  | -0.273785 |
| C  | 2.377433  | 0.164615  | 1.461856  |
| C  | 1.324366  | -0.425703 | 2.183595  |
| C  | 3.659622  | 0.124674  | 2.027824  |
| C  | 1.556716  | -1.102100 | 3.380751  |
| C  | 3.892769  | -0.490730 | 3.254047  |
| C  | 2.841227  | -1.124685 | 3.914861  |
| O  | 0.075616  | -0.423491 | 1.583776  |
| H  | 4.500734  | 0.536452  | 1.463272  |
| H  | 0.743471  | -1.640418 | 3.867835  |
| H  | 4.901499  | -0.516471 | 3.670279  |
| H  | 3.022208  | -1.665356 | 4.846154  |
| H  | 1.436158  | -3.185897 | -2.537782 |
| C  | 1.062288  | -3.039110 | -0.100919 |
| C  | 2.161845  | -3.916392 | -0.265282 |
| C  | 0.222124  | -3.294250 | 1.002970  |
| C  | 2.395686  | -4.967534 | 0.616729  |
| C  | 0.461536  | -4.343038 | 1.884375  |
| C  | 1.554180  | -5.191876 | 1.706141  |
| H  | 2.855401  | -3.753576 | -1.091534 |
| H  | -0.652237 | -2.664871 | 1.157343  |
| H  | 3.260879  | -5.616330 | 0.452373  |
| H  | -0.227877 | -4.502767 | 2.719413  |
| H  | 1.744158  | -6.013579 | 2.400103  |
| N  | 0.815093  | -1.970611 | -0.966273 |
| C  | 1.132331  | -2.136402 | -2.273608 |
| O  | 1.071024  | -1.286774 | -3.154376 |
| C  | -1.766041 | 3.705527  | 0.008288  |
| C  | -0.948798 | 3.557805  | 1.338999  |
| C  | -3.228729 | 3.318387  | 0.175408  |
| O  | -1.159762 | 2.716125  | -0.852081 |
| C  | -1.654828 | 5.060415  | -0.658991 |
| O  | -0.446435 | 2.207825  | 1.245792  |
| C  | -1.778155 | 3.672143  | 2.603660  |
| C  | 0.244673  | 4.492852  | 1.418913  |
| H  | -2.557949 | 2.901850  | 2.656617  |
| H  | -2.258819 | 4.659522  | 2.674206  |
| H  | -1.134201 | 3.552119  | 3.486348  |
| H  | 0.846484  | 4.461879  | 0.503042  |
| H  | 0.891724  | 4.189447  | 2.253866  |
| H  | -0.065508 | 5.534012  | 1.589043  |
| H  | -2.043837 | 5.856558  | -0.006901 |
| H  | -2.244071 | 5.070051  | -1.586269 |
| H  | -0.617543 | 5.303384  | -0.920535 |
| H  | -3.328278 | 2.327760  | 0.644402  |
| H  | -3.716426 | 3.267613  | -0.807574 |
| H  | -3.777099 | 4.044942  | 0.791878  |
| B  | -0.558635 | 1.749134  | -0.065124 |
| H  | -0.043481 | 0.322576  | -1.885880 |
| C  | 2.468206  | 2.440734  | -0.463582 |
| C  | 3.334568  | 3.138518  | 0.385756  |
| C  | 1.917932  | 3.101866  | -1.571915 |
| C  | 3.655040  | 4.469871  | 0.125087  |
| C  | 2.251342  | 4.428807  | -1.837813 |
| C  | 3.121238  | 5.114938  | -0.990548 |
| H  | 3.752913  | 2.649935  | 1.269009  |
| H  | 1.210313  | 2.572555  | -2.217450 |
| H  | 4.325624  | 5.007261  | 0.799809  |
| H  | 1.819348  | 4.931182  | -2.706686 |
| C  | 3.377900  | 6.157057  | -1.194969 |
| C  | 3.406753  | -0.126532 | -1.216188 |
| C  | 3.730030  | 0.367034  | -2.487217 |
| C  | 4.028293  | -1.297931 | -0.768243 |

C 3.927082 -2.821691 -1.868602  
C 5.733002 -1.252070 -1.560434  
C 5.279120 -2.500972 -1.984508  
H 1.971775 -2.164818 -1.230593  
H 5.204660 0.652141 -0.700829  
H 3.562384 -3.799323 -2.195446  
H 6.791859 -0.995473 -1.643830  
H 5.982001 -3.224348 -2.404999  
C -3.451482 0.251008 0.506301  
C -3.566227 0.044067 1.889148  
C -4.422432 -0.316519 -0.334379  
C -4.636123 -0.675208 2.416888  
C -5.485241 -1.047711 0.193018  
C -5.600729 -1.222668 1.571799  
H -2.806772 0.445187 2.565573  
H -4.353873 -0.180493 -1.417871  
H -4.711866 -0.814551 3.498360  
H -6.232536 -1.475501 -0.479822  
H -6.438810 -1.787994 1.986055  
C -2.640125 2.090070 -1.556636  
C -1.802326 2.384349 -2.641293  
C -3.961840 2.564626 -1.567644  
C -2.279170 3.138090 -3.712496  
C -4.430436 3.325653 -2.636300  
C -3.590380 3.610527 -3.712870  
H -0.765763 2.037544 -2.625122  
H -4.634898 2.335433 -0.736643  
H -1.615803 3.357284 -4.552116  
H -5.458410 3.695684 -2.628034  
H -3.960645 4.202181 -4.553615  
<sup>3</sup>Int\_7, -4339.35125, NImag=0  
Co 0.124053 -0.425815 0.047901  
P -0.277025 1.807251 0.553498  
C -1.917759 1.829699 1.395706  
C -3.065665 1.505546 0.650264  
C -2.059530 1.894982 2.788927  
C -4.297330 1.263772 1.256240  
C -3.287079 1.659648 3.407850  
C -4.405898 1.341383 2.642253  
H -1.185419 2.103715 3.409235  
H -5.158109 1.003401 0.635374  
H -3.360574 1.706712 4.496515  
H -5.366678 1.140287 3.121623  
P -1.965021 -1.379233 -0.211329  
C -3.319844 -0.841718 -1.334760  
C -3.610995 0.530735 -1.450296  
C -4.041118 -1.723001 -2.154743  
C -4.548109 1.005047 -2.366778  
C -4.991932 -1.260897 -3.062424  
C -5.237907 0.107044 -3.176704  
O -2.918817 1.456367 -0.710954  
H -3.839370 -2.795896 -2.089274  
H -4.717084 2.081935 -2.426905  
H -5.536258 -1.972182 -3.687245  
H -5.972500 0.477646 -3.895102  
H 1.308517 -2.013549 -1.572490  
C 2.817074 1.026389 -1.565013  
C 3.480169 1.829440 -0.627729  
C 2.406933 1.597135 -2.778467  
C 3.704166 3.179159 -0.888181  
C 2.638948 2.945552 -3.031299  
C 3.279394 3.747523 -2.087379  
H 3.828516 1.391085 0.305356  
H 1.896720 0.981898 -3.519220  
H 4.208189 3.790117 -0.134179  
H 2.303928 3.376308 -3.978106  
H 3.442639 4.809307 -2.286359  
N 2.573622 -0.351081 -1.304133  
C 1.294948 -0.905130 -1.573968  
O 0.352194 -0.245929 -2.084453  
C 5.284746 -2.014834 0.512980  
C 4.124078 -3.067923 0.533523  
C 5.925611 -1.757400 1.858497  
O 4.598017 -0.808419 0.089679  
C 6.338806 -2.318036 -0.538656  
O 3.244635 -2.563352 -0.497011  
C 3.337904 -3.056857 1.834019  
C 4.540762 -4.475768 0.168920  
H 3.030945 -2.038832 2.112681  
H 3.911991 -3.493438 2.663444  
H 2.415667 -3.639067 1.704581  
H 4.971528 -4.529474 -0.837988  
H 3.667891 -5.141947 0.193203  
H 5.279749 -4.864214 0.884831

C 4.668271 -0.283647 -3.282124  
C 4.970354 -1.946630 -1.565478  
C 5.294487 -1.441847 -2.822903  
H 3.230931 1.258746 -2.873593  
H 3.765796 -1.728809 0.200747  
H 4.902279 0.111779 -4.272860  
H 5.443013 -2.861996 -1.199687  
H 6.028716 -1.954570 -3.448621  
C -2.486773 -2.434495 -0.662038  
C -2.098789 -2.975731 -1.895585  
C -3.152026 -3.242399 0.266159  
C -2.367034 -4.309885 -2.188480  
C -3.423342 -4.577184 -0.033423  
C -3.026340 -5.113551 -1.257148  
H -1.568881 -2.348606 -2.620154  
H -3.440085 -2.837535 1.241458  
H -2.049440 -4.727535 -3.146717  
H -3.937892 -5.203626 0.699222  
H -3.227001 -6.162979 -1.484993  
C -3.348065 0.136084 -1.328486  
C -4.707897 -0.161308 -1.147351  
C -2.971684 0.976217 -2.383405  
C -5.674876 0.432547 -1.954056  
C -3.940698 1.549999 -3.205676  
C -5.292244 1.296560 -2.981506  
H -5.018638 -0.894054 -0.397490  
H -1.912447 1.175407 -2.552490  
H -6.730660 0.200200 -1.796285  
H -3.632610 2.199268 -4.028677  
H -6.050701 1.752635 -3.622464  
<sup>3</sup>TS\_7, -4339.34254, NImag=1  
Co 0.036548 0.114070 -0.138666  
P 1.768082 1.623961 -0.035268  
C 3.361560 0.849289 -0.506066  
C 3.783215 -0.233401 0.286372  
C 4.026990 1.061690 -1.719781  
C 4.819300 -1.075612 -0.110654  
C 5.071884 0.231516 -2.124751  
C 5.462474 -0.838980 -1.323851  
H 3.699400 1.865636 -2.382588  
H 5.101571 -1.920163 0.522347  
H 5.565253 0.410181 -3.082540  
H 6.267341 -1.503973 -1.645402  
P 0.973422 -1.953969 -0.077830  
C 2.010235 -2.556404 1.334315  
C 2.922320 -1.682652 1.954304  
C 1.866572 -3.831532 1.903282  
C 3.624614 -2.041508 3.102586  
C 2.577183 -4.209553 3.040905  
C 3.448757 -3.308997 3.651195  
O 3.105726 -0.410956 1.462981  
H 1.170189 -4.542080 1.450773  
H 4.303267 -1.310963 3.547106  
H 2.440634 -5.210383 3.456169  
H 3.997307 -3.593072 4.551943  
H -2.352794 -1.236842 0.556977  
C -2.545406 2.120343 0.360705  
C -3.072625 2.915013 -0.670971  
C -1.617009 2.698456 1.244637  
C -2.695484 4.249177 -0.800592  
C -1.222571 4.026372 1.085114  
C -1.761514 4.812843 0.069042  
H -3.790395 2.477487 -1.365892  
H -1.227837 2.102795 2.067615  
H -3.126650 4.850801 -1.605650  
H -0.493818 4.448870 1.783500  
H -1.453476 5.854475 -0.049356  
N -2.924567 0.763055 0.479295  
C -1.903494 -0.239478 0.695999  
O -1.015283 -0.076368 1.611311  
C -6.484281 0.210709 -0.076321  
C -5.867590 -1.212707 -0.287318  
C -7.469934 0.636898 -1.142212  
O -5.317074 1.061121 -0.151982  
C -7.082588 0.387912 1.310115  
O -4.555190 -1.057825 0.287285  
C -5.675818 -1.557664 -1.756537  
C -6.587473 -2.331200 0.434350  
H -5.175527 -0.741645 -2.296787  
H -6.629896 -1.769068 -2.259609  
H -5.039449 -2.449053 -1.839752  
H -6.595014 -2.177613 1.520056  
H -6.086200 -3.288893 0.238006  
H -7.627703 -2.419154 0.087905

H 6.954941 -3.184606 -0.261448  
H 7.002360 -1.450741 -0.651812  
H 5.882480 -2.519959 -1.517502  
H 5.198888 -1.385415 2.590644  
H 6.721199 -1.006431 1.763341  
H 6.378289 -2.676652 2.257809  
B 3.476347 -1.215530 -0.579667  
H 0.670302 -1.077566 1.408406  
C -0.304972 3.104152 -0.762371  
C 0.121582 4.428020 -0.590714  
C -0.718596 2.699085 -2.042204  
C 0.078281 5.335063 -1.649766  
C -0.772911 3.608379 -3.094121  
C -0.383747 4.933583 -2.900653  
H 0.511196 4.766441 0.370214  
H -0.979018 1.654638 -2.211367  
H 0.414014 6.363018 -1.490875  
H -1.105796 3.270786 -4.079169  
H -0.422257 5.646902 -3.727985  
C 0.822132 2.478583 1.862122  
C 0.599602 3.695787 2.526876  
C 1.929643 1.706939 2.233036  
C 1.489951 4.148255 3.497989  
C 2.824456 2.160232 3.201784  
C 2.611861 3.385941 3.828993  
H -0.292185 4.286578 2.299171  
H 2.067788 0.729644 1.758830  
H 1.303956 5.098407 4.004620  
H 3.688811 1.547140 3.470225  
H 3.310917 3.743445 4.589037  
C -1.420381 -2.976286 -0.914975  
C -1.017104 -4.009503 -0.055808  
C -1.162458 -3.099350 -2.290013  
C -0.383238 -5.142960 -0.561030  
C -0.537281 -4.238717 -2.791137  
C -0.142526 -5.262727 -1.929400  
H -1.188533 -3.917476 1.020802  
H -1.429612 -2.284435 -2.967926  
H -0.073960 -5.938100 0.122007  
H -0.345576 -4.320825 -3.863783  
H 0.355487 -6.151244 -2.324443  
C -2.863111 -1.833175 1.323262  
C -4.148698 -2.392820 1.308642  
C -2.235206 -1.589808 2.550882  
C -4.792664 -2.705813 2.502915  
C -2.882595 -1.907124 3.745129  
C -4.159969 -2.463083 3.724088  
H -4.654196 -2.579048 0.356328  
H -1.230142 -1.152330 2.549857  
H -5.794542 -3.141789 2.481848  
H -2.385801 -1.708738 4.698300  
H -4.667900 -2.707706 4.660373  
<sup>13</sup>C, -4339.37030, NImag=0  
Co 0.233639 0.111822 -0.582225  
P 1.498725 -1.663559 -0.145498  
C 3.186871 -1.319692 0.482366  
C 3.932313 -0.346077 -0.206118  
C 3.700456 -1.799325 1.692742  
C 5.136954 0.141049 0.293226  
C 4.907175 -1.320991 2.203168  
C 5.620978 -0.349404 1.505215  
H 3.131466 -2.541450 2.259655  
H 5.681594 0.909390 -0.260642  
H 5.282710 -1.700811 3.155725  
H 6.561230 0.037335 1.905083  
P 1.455451 1.891605 0.041260  
C 2.757161 2.400970 -1.164164  
C 3.567299 1.413600 -1.756915  
C 2.912778 3.719806 -1.614628  
C 4.486736 1.725549 -2.754927  
C 3.839007 4.043236 -2.605112  
C 4.623708 3.045207 -3.180192  
O 3.410710 0.091578 -1.401288  
H 2.286015 4.507571 -1.187487  
H 5.079004 0.918043 -3.189815  
H 3.938838 5.079468 -2.934873  
H 5.342846 3.290988 -3.964631  
H -2.543304 1.568771 -0.078537  
C -3.057020 -1.736192 0.035279  
C -3.681400 -2.468708 1.058147  
C -2.186857 -2.410904 -0.837049  
C -3.440961 -3.832092 1.201578  
C -1.930519 -3.771251 -0.669010  
C -2.554980 -4.490641 0.347438

H -8.019090 -0.175036 1.428168  
H -7.299901 1.450576 1.480009  
H -6.383553 0.060691 2.092175  
H -7.009924 0.665542 -2.137179  
H -7.853444 1.642526 -0.923999  
H -8.329243 -0.048792 -1.177583  
B -4.240193 0.281720 0.201768  
H -1.306223 -0.292374 -0.887376  
C 2.018459 2.420855 1.604128  
C 2.696074 3.629873 1.802540  
C 1.434123 1.778947 2.705701  
C 2.790764 4.185331 3.078097  
C 1.532789 2.335105 3.978953  
C 2.209401 3.540023 4.168710  
H 3.146436 4.159884 0.961630  
H 0.884064 0.846541 2.549864  
H 3.319499 5.131377 3.217606  
H 1.067845 1.826151 4.826627  
H 2.280127 3.979721 5.166612  
C 1.586351 2.993287 -1.239967  
C 2.579009 3.945011 -1.529245  
C 0.365776 3.070283 -1.922387  
C 2.343722 4.954719 -2.458629  
C 0.131176 4.079038 -2.855960  
C 1.116993 5.025351 -3.122296  
H 3.557668 3.883747 -1.045867  
H -0.414639 2.329523 -1.706013  
H 3.125527 5.687468 -2.672783  
H -0.832549 4.123850 -3.368818  
H 0.935686 5.817845 -3.852430  
C -0.371182 -3.198686 -0.093916  
C -0.726644 -3.903533 -1.251250  
C -1.176899 -3.327456 1.050333  
C -1.855520 -4.723424 -1.261616  
C -2.299599 -4.149820 1.037776  
C -2.643493 -4.851130 -0.119052  
H -0.120541 -3.810084 -2.156630  
H -0.933207 -2.749139 1.947294  
H -2.117902 -5.267548 -2.172363  
H -2.919451 -4.230911 1.934101  
H -3.527291 -5.493918 -0.129996  
C 1.985045 -2.411900 -1.539687  
C 2.748169 -3.585942 -1.605970  
C 1.979226 -1.540914 -2.635031  
C 3.486379 -3.882186 -2.748767  
C 2.715754 -1.839315 -3.781216  
C 3.470253 -3.009310 -3.838947  
H 2.764335 -4.272379 -0.753382  
H 1.390057 -0.616882 -2.577303  
H 4.078106 -4.800011 -2.791435  
H 2.706019 -1.148806 -4.628161  
H 4.050856 -3.242873 -4.734809  
<sup>3</sup>TS\_8, -4750.91985, NImag=1  
Co 0.470510000 -0.029332000 -0.184591000  
P 1.837978000 1.751572000 -0.180613000  
C 3.626496000 1.427799000 -0.429937000  
C 4.226215000 0.469992000 0.406474000  
C 4.383470000 1.923390000 -1.497582000  
C 5.520974000 0.009473000 0.187689000  
C 5.682788000 1.471808000 -1.729073000  
C 6.246831000 0.511974000 -0.890824000  
H 3.938790000 2.657212000 -2.175398000  
H 5.943134000 -0.749008000 0.851725000  
H 6.250743000 1.863098000 -2.575775000  
H 7.259162000 0.145442000 -1.076586000  
P 1.870667000 -1.809538000 -0.322519000  
C 2.807636000 -2.270214000 1.197116000  
C 3.506194000 -1.265856000 1.898874000  
C 2.746990000 -3.538858000 1.791109000  
C 4.135331000 -1.525547000 3.113828000  
C 3.375585000 -3.808071000 3.006244000  
C 4.076530000 -2.802150000 3.667975000  
O 3.468685000 0.039769000 1.464798000  
H 2.178855000 -4.332304000 1.299822000  
H 4.646344000 -0.703944000 3.619600000  
H 3.307841000 -4.808249000 3.439645000  
H 4.566977000 -3.003956000 4.622766000  
H -2.488390000 -0.439677000 -2.449952000  
C -3.359851000 2.270728000 -0.737641000  
C -4.516770000 3.001228000 -0.404204000  
C -2.114782000 2.910872000 -0.576501000  
C -4.421133000 4.306521000 0.070372000  
C -2.034191000 4.221770000 -0.114611000  
C -3.184350000 4.934179000 0.219237000

|   |           |           |           |   |              |              |              |
|---|-----------|-----------|-----------|---|--------------|--------------|--------------|
| H | -4.367341 | -1.954112 | 1.733927  | H | -5.495904000 | 2.541609000  | -0.522306000 |
| H | -1.750565 | -1.852060 | -1.663000 | H | -1.194589000 | 2.358887000  | -0.771990000 |
| H | -3.939949 | -4.384220 | 2.002957  | H | -5.339822000 | 4.845236000  | 0.318739000  |
| H | -1.241637 | -4.275070 | -1.354190 | H | -1.046792000 | 4.680109000  | -0.001179000 |
| H | -2.354411 | -5.557296 | 0.474384  | H | -3.118940000 | 5.960432000  | 0.587256000  |
| N | -3.299796 | -0.351744 | -0.101382 | N | -3.419029000 | 0.951111000  | -1.218347000 |
| C | -2.151133 | 0.545791  | -0.254519 | C | -2.173375000 | 0.389454000  | -1.785715000 |
| O | -1.454989 | 0.435255  | -1.418302 | O | -1.289893000 | -0.029030000 | -0.850217000 |
| C | -6.860146 | 0.313976  | -0.301819 | C | -6.558238000 | -0.813427000 | -0.565455000 |
| C | -6.267562 | 1.732982  | -0.007202 | C | -5.759494000 | -1.810726000 | -1.472664000 |
| C | -8.066393 | -0.054642 | 0.534779  | C | -7.989762000 | -0.575121000 | -0.996892000 |
| O | -5.762241 | -0.551172 | 0.051429  | O | -5.812626000 | 0.409518000  | -0.725443000 |
| C | -7.148927 | 0.099702  | -1.779907 | C | -6.502894000 | -1.181767000 | 0.908414000  |
| O | -4.866049 | 1.538133  | -0.277878 | O | -4.424023000 | -1.276902000 | -1.418194000 |
| C | -6.396593 | 2.125622  | 1.456980  | C | -6.206080000 | -1.764277000 | -2.926275000 |
| C | -6.792745 | 2.835325  | -0.901530 | C | -5.739407000 | -3.238706000 | -0.968761000 |
| H | -6.043888 | 1.321698  | 2.118185  | H | -6.240005000 | -0.731787000 | -3.300939000 |
| H | -7.433815 | 2.365039  | 1.730807  | H | -7.198481000 | -2.214472000 | -3.068950000 |
| H | -5.779726 | 3.013087  | 1.651340  | H | -5.488344000 | -2.319558000 | -3.544502000 |
| H | -6.564057 | 2.646517  | -1.957080 | H | -5.258921000 | -3.317885000 | 0.014577000  |
| H | -6.333382 | 3.795180  | -0.629156 | H | -5.181533000 | -3.878966000 | -1.665344000 |
| H | -7.882282 | 2.943303  | -0.795083 | H | -6.759190000 | -3.643454000 | -0.889983000 |
| H | -8.023564 | 0.673823  | -2.116944 | H | -7.099708000 | -2.076191000 | 1.135730000  |
| H | -7.349447 | -0.964667 | -1.959782 | H | -6.893908000 | -0.348305000 | 1.507389000  |
| H | -6.288489 | 0.386298  | -2.400370 | H | -5.468299000 | -1.366200000 | 1.226803000  |
| H | -7.834738 | -0.058965 | 1.606649  | H | -8.048162000 | -0.154057000 | -2.007441000 |
| H | -8.419053 | -1.059883 | 0.267890  | H | -8.478777000 | 0.132158000  | -0.313776000 |
| H | -8.894851 | 0.648014  | 0.361502  | H | -8.566534000 | -1.511495000 | -0.977371000 |
| B | -4.610941 | 0.192175  | -0.105286 | B | -4.532240000 | 0.068995000  | -1.115440000 |
| H | -1.483640 | 0.346410  | 0.659829  | H | -1.764717000 | 1.185727000  | -2.450759000 |
| C | 1.838262  | -2.597203 | -1.690820 | C | 1.792150000  | 2.794858000  | 1.326456000  |
| C | 2.947762  | -3.435356 | -1.864469 | C | 2.917224000  | 3.407637000  | 1.891428000  |
| C | 0.956581  | -2.406582 | -2.762620 | C | 0.545357000  | 2.956643000  | 1.944667000  |
| C | 3.145783  | -4.100148 | -3.073442 | C | 2.789784000  | 4.181226000  | 3.044764000  |
| C | 1.153197  | -3.073012 | -3.970789 | C | 0.417004000  | 3.736283000  | 3.090429000  |
| C | 2.245090  | -3.926285 | -4.125182 | C | 1.540693000  | 4.350466000  | 3.643142000  |
| H | 3.671308  | -3.557037 | -1.051997 | H | 3.900004000  | 3.278068000  | 1.427471000  |
| H | 0.116149  | -1.712330 | -2.643427 | H | -0.333814000 | 2.454874000  | 1.524483000  |
| H | 4.013045  | -4.753214 | -3.198383 | H | 3.673407000  | 4.654472000  | 3.480291000  |
| H | 0.456364  | -2.915806 | -4.797275 | H | -0.563705000 | 3.847536000  | 3.559532000  |
| H | 2.403728  | -4.447396 | -5.072349 | H | 1.445394000  | 4.955407000  | 4.548061000  |
| C | 0.889930  | -2.916199 | 1.047639  | C | 1.474137000  | 2.965558000  | -1.510882000 |
| C | 1.323287  | -4.247953 | 1.068135  | C | 1.828413000  | 4.319371000  | -1.441816000 |
| C | -0.061161 | -2.498888 | 1.987298  | C | 0.768347000  | 2.503558000  | -2.628516000 |
| C | 0.832216  | -5.134288 | 2.025165  | C | 1.486823000  | 5.188705000  | -2.476450000 |
| C | -0.546612 | -3.381991 | 2.948681  | C | 0.430552000  | 3.370644000  | -3.665448000 |
| C | -0.097077 | -4.701285 | -2.971362 | C | 0.788806000  | 4.716056000  | -3.588844000 |
| H | 2.048736  | -4.599742 | 0.329150  | H | 2.368058000  | 4.697547000  | -0.567716000 |
| H | -0.444086 | -1.472423 | 1.941798  | H | 0.452279000  | 1.453510000  | -2.653806000 |
| H | 1.176151  | -6.117561 | 2.030389  | H | 1.760299000  | 6.244641000  | -2.411117000 |
| H | -1.297283 | -3.042669 | 3.666185  | H | -0.131207000 | 2.998516000  | -4.525561000 |
| H | -0.483332 | -5.399209 | 3.718246  | H | 0.513394000  | 5.402323000  | -4.393113000 |
| C | 0.423421  | 3.407934  | 0.153734  | C | 0.932748000  | -3.332025000 | -0.760823000 |
| C | 0.603671  | 4.417652  | 1.108881  | C | 1.532842000  | -4.543310000 | -1.136600000 |
| C | -0.621485 | 3.526339  | -0.776862 | C | -0.463535000 | -3.226598000 | -0.796312000 |
| C | -0.233756 | 5.533082  | 1.120343  | C | 0.750075000  | -5.633202000 | -1.510880000 |
| C | -1.450341 | 4.645917  | -0.765085 | C | -1.245089000 | -4.317623000 | -1.177008000 |
| C | -1.257691 | 5.652440  | 0.181372  | C | -0.641936000 | -5.523278000 | -1.529168000 |
| H | 1.400148  | 4.335043  | 1.853351  | H | 2.622868000  | -4.636589000 | -1.146973000 |
| H | -0.804150 | 2.714160  | -1.489812 | H | -0.938787000 | -2.269697000 | -0.555229000 |
| H | -0.085385 | 6.312480  | 1.871855  | H | 1.229548000  | -6.571527000 | -1.800386000 |
| H | -2.263786 | 4.720917  | -1.490609 | H | -2.332802000 | -4.208466000 | -1.209642000 |
| H | -1.913974 | 6.526009  | 0.195499  | H | -1.252978000 | -6.377092000 | -1.832478000 |
| C | 2.353727  | 1.891293  | 1.643530  | C | 3.167695000  | -1.817240000 | -1.625869000 |
| C | 3.460832  | 2.706807  | 1.913775  | C | 4.319562000  | -2.613892000 | -1.575427000 |
| C | 1.876703  | 1.039522  | 2.646736  | C | 2.946643000  | -1.014950000 | -2.751941000 |
| C | 4.064884  | 2.680265  | 3.169331  | C | 5.216449000  | -2.624228000 | -2.641870000 |
| C | 2.476539  | 1.016583  | 3.904162  | C | 3.842728000  | -1.025907000 | -3.818658000 |
| C | 3.571243  | 1.839028  | 4.167442  | C | 4.976961000  | -1.835136000 | -3.767399000 |
| H | 3.853983  | 3.368052  | 1.134525  | H | 4.523465000  | -3.222768000 | -0.688216000 |
| H | 1.032813  | 0.377048  | 2.420636  | H | 2.062672000  | -0.367022000 | -2.775059000 |
| H | 4.927995  | 3.319831  | 3.370295  | H | 6.111350000  | -3.249716000 | -2.592311000 |
| H | 2.094071  | 0.344417  | 4.676212  | H | 3.658026000  | -0.391760000 | -4.689164000 |
| H | 4.047649  | 1.818718  | 5.150577  | H | 5.682139000  | -1.844009000 | -4.602012000 |
|   |           |           |           | C | -2.077055000 | -0.190039000 | 3.234525000  |
|   |           |           |           | C | -1.722810000 | -1.571458000 | 2.598886000  |
|   |           |           |           | C | -2.721982000 | 0.756713000  | 2.236998000  |
|   |           |           |           | O | -0.759216000 | 0.357463000  | 3.528570000  |
|   |           |           |           | C | -2.870416000 | -0.272784000 | 4.518023000  |
|   |           |           |           | O | -0.428332000 | -1.290676000 | 1.975429000  |
|   |           |           |           | C | -2.705301000 | -2.043435000 | 1.555005000  |
|   |           |           |           | C | -1.456620000 | -2.655563000 | 3.629396000  |
|   |           |           |           | H | -2.744698000 | -1.362354000 | 0.694156000  |
|   |           |           |           | H | -3.706746000 | -2.124559000 | 2.004011000  |

<sup>3</sup>Int\_8, -4750.92447, NImag=0

|    |              |              |              |
|----|--------------|--------------|--------------|
| Co | 0.512494000  | 0.037640000  | 0.076785000  |
| P  | 2.197347000  | 1.543682000  | 0.051819000  |
| C  | 3.903794000  | 0.948242000  | -0.271679000 |
| C  | 4.354014000  | -0.165259000 | 0.458984000  |
| C  | 4.736676000  | 1.440480000  | -1.283761000 |
| C  | 5.598113000  | -0.744755000 | 0.218533000  |
| C  | 5.978512000  | 0.861367000  | -1.543485000 |
| C  | 6.411439000  | -0.224889000 | -0.785944000 |
| H  | 4.400609000  | 2.285882000  | -1.889905000 |
| H  | 5.914251000  | -1.606771000 | 0.810705000  |
| H  | 6.606320000  | 1.260503000  | -2.342837000 |
| H  | 7.385451000  | -0.679997000 | -0.980791000 |
| P  | 1.556527000  | -1.892240000 | -0.498477000 |
| C  | 2.560393000  | -2.751847000 | 0.784013000  |
| C  | 3.396721000  | -1.995334000 | 1.631121000  |
| C  | 2.409779000  | -4.113868000 | 1.084204000  |
| C  | 4.049606000  | -2.571069000 | 2.717855000  |
| C  | 3.070195000  | -4.700656000 | 2.162381000  |
| C  | 3.889799000  | -3.929262000 | 2.983567000  |
| O  | 3.519268000  | -0.634826000 | 1.444433000  |
| H  | 1.746580000  | -4.725584000 | 0.467880000  |
| H  | 4.671329000  | -1.932909000 | 3.349058000  |
| H  | 2.931756000  | -5.764478000 | 2.366519000  |
| H  | 4.401209000  | -4.380340000 | 3.836754000  |
| H  | -2.228986000 | -0.628391000 | -1.868224000 |
| C  | -3.141418000 | 2.465472000  | -1.067897000 |
| C  | -4.240838000 | 3.318687000  | -1.275987000 |
| C  | -1.909002000 | 3.053568000  | -0.718804000 |
| C  | -4.105187000 | 4.697493000  | -1.140000000 |
| C  | -1.783639000 | 4.435147000  | -0.600260000 |
| C  | -2.878680000 | 5.272375000  | -0.806174000 |
| H  | -5.203843000 | 2.893848000  | -1.555363000 |
| H  | -1.047922000 | 2.417360000  | -0.506923000 |
| H  | -4.977475000 | 5.333944000  | -1.312378000 |
| H  | -0.808237000 | 4.854870000  | -0.334178000 |
| H  | -2.779315000 | 6.356543000  | -0.707537000 |
| N  | -3.244535000 | 1.072485000  | -1.234829000 |
| C  | -1.982073000 | 0.329705000  | -1.364482000 |
| O  | -1.371827000 | 0.136720000  | -0.162047000 |
| C  | -6.553950000 | -0.316652000 | -0.568891000 |
| C  | -5.770039000 | -1.527673000 | -1.172548000 |
| C  | -7.929178000 | -0.094735000 | -1.159639000 |
| O  | -5.707712000 | 0.797155000  | -0.920197000 |
| C  | -6.620774000 | -0.371342000 | 0.949127000  |
| O  | -4.402669000 | -1.084101000 | -1.066983000 |
| C  | -6.063481000 | -1.739436000 | -2.650154000 |
| C  | -5.941906000 | -2.823314000 | -0.407559000 |
| H  | -5.978396000 | -0.800264000 | -3.214382000 |
| H  | -7.069002000 | -2.150916000 | -2.816763000 |
| H  | -5.332880000 | -2.446219000 | -3.066608000 |
| H  | -5.547675000 | -2.752873000 | 0.613703000  |
| H  | -5.415811000 | -3.643321000 | -0.914699000 |
| H  | -7.004310000 | -3.102829000 | -0.349607000 |
| H  | -7.319391000 | -1.141794000 | 1.304731000  |
| H  | -6.956123000 | 0.600500000  | 1.335192000  |
| H  | -5.630134000 | -0.579462000 | 1.376425000  |
| H  | -7.883407000 | 0.107552000  | -2.236393000 |
| H  | -8.413871000 | 0.766202000  | -0.680097000 |
| H  | -8.571812000 | -0.972767000 | -0.998506000 |
| B  | -4.430080000 | 0.301324000  | -1.077264000 |
| H  | -1.365042000 | 0.912013000  | -2.092607000 |
| C  | 2.355583000  | 2.451475000  | 1.636819000  |
| C  | 3.569468000  | 2.683287000  | 2.294669000  |
| C  | 1.165266000  | 2.917809000  | 2.212845000  |
| C  | 3.590679000  | 3.377530000  | 3.504341000  |
| C  | 1.190214000  | 3.614804000  | 3.417232000  |
| C  | 2.403504000  | 3.846304000  | 4.066105000  |
| H  | 4.505980000  | 2.320949000  | 1.860400000  |
| H  | 0.206662000  | 2.713892000  | 1.723646000  |
| H  | 4.542903000  | 3.552572000  | 4.011310000  |
| H  | 0.252879000  | 3.964264000  | 3.856632000  |

<sup>3</sup>TS\_9, -4750.91598, NImag=1

|    |              |              |              |
|----|--------------|--------------|--------------|
| Co | 0.581338000  | -0.078012000 | 0.002160000  |
| P  | 1.988369000  | 1.614342000  | 0.420740000  |
| C  | 3.784587000  | 1.353474000  | 0.145163000  |
| C  | 4.354881000  | 0.203519000  | 0.718845000  |
| C  | 4.591890000  | 2.126780000  | -0.697434000 |
| C  | 5.684932000  | -0.144791000 | 0.493123000  |
| C  | 5.921808000  | 1.783340000  | -0.939889000 |
| C  | 6.469525000  | 0.653170000  | -0.336668000 |
| H  | 4.166042000  | 3.005799000  | -1.188457000 |
| H  | 6.092253000  | -1.045316000 | 0.958656000  |
| H  | 6.527988000  | 2.399840000  | -1.607064000 |
| H  | 7.511755000  | 0.380691000  | -0.519153000 |
| P  | 1.944839000  | -1.669904000 | -0.808196000 |
| C  | 2.983632000  | -2.608419000 | 0.391874000  |
| C  | 3.618622000  | -1.925546000 | 1.449566000  |
| C  | 3.045411000  | -4.009966000 | 0.404399000  |
| C  | 4.275109000  | -2.609233000 | 2.469520000  |
| C  | 3.712734000  | -4.701005000 | 1.414456000  |
| C  | 4.324216000  | -4.001445000 | 2.452644000  |
| O  | 3.542141000  | -0.551950000 | 1.530835000  |
| H  | 2.546182000  | -4.573343000 | -0.388070000 |
| H  | 4.735056000  | -2.029090000 | 3.272066000  |
| H  | 3.742653000  | -5.792436000 | 1.393749000  |
| H  | 4.837669000  | -4.537147000 | 3.254125000  |
| H  | -2.637964000 | -1.178353000 | -1.221927000 |
| C  | -2.874707000 | 2.144418000  | -0.808129000 |
| C  | -3.243192000 | 3.093878000  | -1.770694000 |
| C  | -2.158653000 | 2.568821000  | 0.323467000  |
| C  | -2.904734000 | 4.436052000  | -1.607619000 |
| C  | -1.800670000 | 3.908246000  | 0.467264000  |
| C  | -2.173593000 | 4.847712000  | -0.493433000 |
| H  | -3.815036000 | 2.765732000  | -2.641875000 |
| H  | -1.914269000 | 1.832192000  | 1.089839000  |
| H  | -3.208975000 | 5.165388000  | -2.363463000 |
| H  | -1.232098000 | 4.221426000  | 1.348082000  |
| H  | -1.894245000 | 5.897564000  | -0.374314000 |
| N  | -3.234109000 | 0.782069000  | -0.966678000 |
| C  | -2.145887000 | -0.197742000 | -1.057392000 |
| O  | -1.320685000 | -0.202408000 | 0.031047000  |
| C  | -6.839188000 | 0.457145000  | -0.816768000 |
| C  | -6.390206000 | -0.990213000 | -1.223833000 |
| C  | -7.994434000 | 1.009626000  | -1.624375000 |
| O  | -5.659401000 | 1.235434000  | -1.095033000 |
| C  | -7.121980000 | 0.586175000  | 0.672064000  |
| O  | -4.972605000 | -0.955597000 | -0.973492000 |
| C  | -6.582415000 | -1.265704000 | -2.707349000 |
| C  | -7.002654000 | -2.098246000 | -0.392835000 |
| H  | -6.154839000 | -0.460852000 | -3.321311000 |
| H  | -7.643159000 | -1.374372000 | -2.973914000 |
| H  | -6.067292000 | -2.198150000 | -2.974118000 |
| H  | -6.732811000 | -2.008317000 | 0.666909000  |
| H  | -6.644686000 | -3.076289000 | -0.742772000 |
| H  | -8.099671000 | -2.094676000 | -0.473870000 |
| H  | -8.046997000 | 0.069901000  | 0.965309000  |
| H  | -7.226707000 | 1.648285000  | 0.929932000  |
| H  | -6.294562000 | 0.180064000  | 1.269725000  |
| H  | -7.754042000 | 1.072340000  | -2.692343000 |
| H  | -8.244187000 | 2.022390000  | -1.281010000 |
| H  | -8.892126000 | 0.384846000  | -1.506549000 |
| B  | -4.586069000 | 0.372258000  | -1.021314000 |
| H  | -1.572399000 | 0.024471000  | -1.992585000 |
| C  | 1.942535000  | 2.244070000  | 2.143753000  |
| C  | 3.049113000  | 2.797853000  | 2.800795000  |
| C  | 0.725515000  | 2.137735000  | 2.829179000  |
| C  | 2.931368000  | 3.250759000  | 4.114431000  |
| C  | 0.608881000  | 2.592333000  | 4.140214000  |
| C  | 1.712198000  | 3.151161000  | 4.785435000  |
| H  | 4.012053000  | 2.870147000  | 2.285508000  |
| H  | -0.133697000 | 1.675881000  | 2.334688000  |
| H  | 3.800335000  | 3.679902000  | 4.619568000  |
| H  | -0.346426000 | 2.489756000  | 4.660801000  |



|   |              |              |              |
|---|--------------|--------------|--------------|
| H | 2.423405000  | 4.387103000  | 5.015375000  |
| C | 2.015318000  | 2.918859000  | -1.150353000 |
| C | 2.655402000  | 4.157150000  | -0.995467000 |
| C | 1.160337000  | 2.731202000  | -2.242214000 |
| C | 2.450430000  | 5.176047000  | -1.923159000 |
| C | 0.954196000  | 3.748940000  | -3.171674000 |
| C | 1.601104000  | 4.972977000  | -3.012848000 |
| H | 3.314287000  | 4.324426000  | -0.137508000 |
| H | 0.623873000  | 1.781365000  | -2.340009000 |
| H | 2.950465000  | 6.138691000  | -1.791625000 |
| H | 0.268723000  | 3.591558000  | -4.007477000 |
| H | 1.433301000  | 5.777701000  | -3.732492000 |
| C | 0.377703000  | -3.177349000 | -1.078259000 |
| C | 0.763185000  | -4.257583000 | -1.886715000 |
| C | -0.975085000 | -3.014538000 | -0.749711000 |
| C | -0.185884000 | -5.171434000 | -2.338909000 |
| C | -1.922694000 | -3.928619000 | -1.210684000 |
| C | -1.531035000 | -5.008155000 | -2.000344000 |
| H | 1.813257000  | -4.380154000 | -2.171507000 |
| H | -1.283915000 | -2.149796000 | -0.153151000 |
| H | 0.123342000  | -6.009569000 | -2.968362000 |
| H | -2.974854000 | -3.773480000 | -0.959300000 |
| H | -2.274846000 | -5.720575000 | -2.366321000 |
| C | 2.662279000  | -1.749358000 | -1.953234000 |
| C | 3.886566000  | -2.409211000 | -2.100590000 |
| C | 2.219253000  | -0.902167000 | -2.979829000 |
| C | 4.652482000  | -2.221766000 | -3.251743000 |
| C | 2.979257000  | -0.720660000 | -4.131109000 |
| C | 4.202177000  | -1.380002000 | -4.267400000 |
| H | 4.249363000  | -3.068619000 | -1.305392000 |
| H | 1.259461000  | -0.384311000 | -2.867512000 |
| H | 5.612068000  | -2.735431000 | -3.352418000 |
| H | 2.619931000  | -0.056378000 | -4.920881000 |
| H | 4.806474000  | -1.233721000 | -5.165776000 |
| C | -2.162602000 | 0.151437000  | 3.370199000  |
| C | -2.070345000 | -1.411947000 | 3.115986000  |
| C | -3.152224000 | 0.867029000  | 2.467212000  |
| O | -0.842201000 | 0.624078000  | 2.996830000  |
| C | -2.403664000 | 0.534079000  | 4.817129000  |
| O | -0.879433000 | -1.559370000 | 2.302293000  |
| C | -3.235723000 | -1.980834000 | 2.331928000  |
| C | -1.824581000 | -2.221276000 | 4.377966000  |
| H | -3.321875000 | -1.511392000 | 1.342063000  |
| H | -4.182244000 | -1.843228000 | 2.877156000  |
| H | -3.092350000 | -3.060310000 | 2.180019000  |
| H | -0.944598000 | -1.857680000 | 4.924885000  |
| H | -1.635788000 | -3.268596000 | 4.107399000  |
| H | -2.687734000 | -2.195319000 | 5.057318000  |
| H | -3.376233000 | 0.157692000  | 5.165738000  |
| H | -2.417504000 | 1.627973000  | 4.912430000  |
| H | -1.624896000 | 0.151693000  | 5.487634000  |
| H | -2.954094000 | 0.643184000  | 1.410591000  |
| H | -3.041650000 | 1.952447000  | 2.599976000  |
| H | -4.189621000 | 0.604500000  | 2.718795000  |
| B | -0.242411000 | -0.360953000 | 2.281748000  |
| H | 0.900634000  | -0.234071000 | 1.844382000  |

<sup>1</sup>Int\_9, -4750.93723, NImag=0

|   |              |              |              |
|---|--------------|--------------|--------------|
| H | 1.625834000  | 3.501275000  | 5.816958000  |
| C | 1.623131000  | 3.104530000  | -0.585197000 |
| C | 2.120394000  | 4.381866000  | -0.294465000 |
| C | 0.772285000  | 2.943939000  | -1.686209000 |
| C | 1.799464000  | 5.465062000  | -1.110862000 |
| C | 0.459499000  | 4.022371000  | -2.510343000 |
| C | 0.978078000  | 5.284379000  | -2.224790000 |
| H | 2.764071000  | 4.529368000  | 0.578696000  |
| H | 0.324033000  | 1.960782000  | -1.876198000 |
| H | 2.191674000  | 6.457542000  | -0.875539000 |
| H | -0.213273000 | 3.880789000  | -3.359129000 |
| H | 0.725960000  | 6.135979000  | -2.861585000 |
| C | 1.061486000  | -3.005476000 | -1.714241000 |
| C | 1.624771000  | -3.713408000 | -2.785672000 |
| C | -0.256948000 | -3.285585000 | -1.327227000 |
| C | 0.887830000  | -4.693801000 | -3.447801000 |
| C | -0.988707000 | -4.270241000 | -1.989921000 |
| C | -0.419778000 | -4.975046000 | -3.050098000 |
| H | 2.646869000  | -3.495023000 | -3.109484000 |
| H | -0.710148000 | -2.725880000 | -0.502817000 |
| H | 1.335839000  | -5.237618000 | -4.283159000 |
| H | -2.016314000 | -4.477365000 | -1.680101000 |
| H | -0.998028000 | -5.739986000 | -3.574213000 |
| C | 3.116695000  | -1.079975000 | -2.089582000 |
| C | 4.411643000  | -1.572260000 | -2.283430000 |
| C | 2.644274000  | -0.062385000 | -2.929688000 |
| C | 5.213720000  | -1.057508000 | -3.302627000 |
| C | 3.439837000  | 0.445981000  | -3.951894000 |
| C | 4.730016000  | -0.052457000 | -4.139207000 |
| H | 4.799202000  | -2.358782000 | -1.627470000 |
| H | 1.637943000  | 0.338718000  | -2.763815000 |
| H | 6.227336000  | -1.442693000 | -3.440335000 |
| H | 3.055809000  | 1.241352000  | -4.595463000 |
| H | 5.362569000  | 0.349292000  | -4.934340000 |
| C | -2.637697000 | -1.152864000 | 3.119555000  |
| C | -2.239351000 | -2.604484000 | 2.632855000  |
| C | -3.769274000 | -0.541704000 | 2.312829000  |
| O | -1.445626000 | -0.381097000 | 2.853116000  |
| C | -2.944241000 | -1.053858000 | 4.600795000  |
| O | -1.119043000 | -2.371904000 | 1.753722000  |
| C | -3.324033000 | -3.314895000 | 1.845285000  |
| C | -1.727359000 | -3.494303000 | 3.754404000  |
| H | -3.625289000 | -2.748600000 | 0.953639000  |
| H | -4.218595000 | -3.481867000 | 2.464252000  |
| H | -2.959871000 | -4.298175000 | 1.515798000  |
| H | -0.914929000 | -3.007210000 | 4.310176000  |
| H | -1.324231000 | -4.421625000 | 3.326030000  |
| H | -2.520812000 | -3.763555000 | 4.465564000  |
| H | -3.809013000 | -1.679258000 | 4.866981000  |
| H | -3.191847000 | -0.015852000 | 4.860745000  |
| H | -2.093351000 | -1.358107000 | 5.221758000  |
| H | -3.549606000 | -0.560777000 | 1.239796000  |
| H | -3.902447000 | 0.509971000  | 2.604815000  |
| H | -4.718905000 | -1.067841000 | 2.489166000  |
| B | -0.719614000 | -1.072260000 | 1.918588000  |
| H | 0.446162000  | -0.728665000 | 1.721991000  |

<sup>3</sup>TS\_10, -4750.90476, NImag=1

|    |              |              |              |
|----|--------------|--------------|--------------|
| Co | 0.856443000  | -0.188906000 | -0.148889000 |
| P  | 1.809733000  | 1.808467000  | 0.030773000  |
| C  | 3.628723000  | 1.785906000  | -0.182434000 |
| C  | 4.329905000  | 0.852460000  | 0.601607000  |
| C  | 4.329401000  | 2.452233000  | -1.193836000 |
| C  | 5.669107000  | 0.556059000  | 0.360872000  |
| C  | 5.675533000  | 2.175609000  | -1.434750000 |
| C  | 6.337645000  | 1.218557000  | -0.668140000 |
| H  | 3.804533000  | 3.176028000  | -1.823990000 |
| H  | 6.173821000  | -0.197514000 | 0.970477000  |
| H  | 6.202102000  | 2.695190000  | -2.238333000 |
| H  | 7.385067000  | 0.981189000  | -0.868916000 |
| P  | 2.482595000  | -1.662445000 | -0.454692000 |
| C  | 3.399146000  | -2.077093000 | 1.095530000  |
| C  | 3.835375000  | -1.046071000 | 1.947986000  |
| C  | 3.588652000  | -3.395869000 | 1.532170000  |
| C  | 4.425153000  | -1.317521000 | 3.179915000  |
| C  | 4.186520000  | -3.678300000 | 2.759792000  |
| C  | 4.601059000  | -2.637676000 | 3.588588000  |
| O  | 3.618876000  | 0.271233000  | 1.617407000  |
| H  | 3.246896000  | -4.220870000 | 0.900731000  |
| H  | 4.729665000  | -0.477253000 | 3.806816000  |
| H  | 4.319111000  | -4.716710000 | 3.071254000  |
| H  | 5.060824000  | -2.850359000 | 4.556328000  |
| H  | -2.733781000 | -0.778327000 | -2.254404000 |
| C  | -3.372122000 | 2.051295000  | -0.659619000 |
| C  | -4.445072000 | 2.957005000  | -0.658244000 |

|   |              |              |              |   |              |              |              |
|---|--------------|--------------|--------------|---|--------------|--------------|--------------|
| C | -2.009609000 | 2.361337000  | -0.027624000 | C | -2.107610000 | 2.513320000  | -0.261418000 |
| C | -2.416311000 | 3.830928000  | -2.363530000 | C | -4.249362000 | 4.280107000  | -0.270028000 |
| C | -1.478255000 | 3.644156000  | -0.150779000 | C | -1.922475000 | 3.840001000  | 0.116508000  |
| C | -1.681804000 | 4.384472000  | -1.315384000 | C | -2.990010000 | 4.735423000  | 0.116369000  |
| H | -3.528702000 | 2.108999000  | -3.063162000 | H | -5.432923000 | 2.623387000  | -0.970424000 |
| H | -1.908268000 | 1.787617000  | 0.896917000  | H | -1.262385000 | 1.821085000  | -0.210699000 |
| H | -2.585169000 | 4.405583000  | -3.278212000 | H | -5.100086000 | 4.966502000  | -0.282088000 |
| H | -0.908086000 | 4.073967000  | 0.678580000  | H | -0.927951000 | 4.167391000  | 0.432035000  |
| H | -1.265539000 | 5.390962000  | -1.405857000 | H | -2.841830000 | 5.774352000  | 0.418679000  |
| N | -3.314017000 | 0.501017000  | -0.943954000 | N | -3.544149000 | 0.705930000  | -1.068064000 |
| C | -2.418822000 | -0.638524000 | -1.037941000 | C | -2.391865000 | 0.000864000  | -1.559063000 |
| O | -1.274960000 | -0.503449000 | -0.256492000 | O | -1.560507000 | -0.639629000 | -0.601882000 |
| C | -6.925593000 | 0.741830000  | -0.709827000 | C | -6.995921000 | -0.573610000 | -0.973457000 |
| C | -6.707942000 | -0.763506000 | -1.093076000 | C | -6.141629000 | -1.783663000 | -1.511080000 |
| C | -7.982654000 | 1.454187000  | -1.526649000 | C | -8.162457000 | -0.190865000 | -1.862210000 |
| O | -5.639068000 | 1.324217000  | -1.003127000 | O | -6.044166000 | 0.516230000  | -0.979497000 |
| C | -7.184012000 | 0.933770000  | 0.776370000  | C | -7.480887000 | -0.755797000 | 0.454687000  |
| O | -5.298871000 | -0.944837000 | -0.847150000 | O | -4.789138000 | -1.385714000 | -1.203120000 |
| C | -6.942220000 | -1.029424000 | -2.572546000 | C | -6.218449000 | -1.940092000 | -3.022105000 |
| C | -7.483954000 | -1.749311000 | -0.245985000 | C | -6.424301000 | -3.104045000 | -0.826896000 |
| H | -6.399562000 | -0.307335000 | -3.198757000 | H | -5.994589000 | -0.995096000 | -3.536496000 |
| H | -8.007617000 | -0.980718000 | -2.837980000 | H | -7.208053000 | -2.283455000 | -3.353291000 |
| H | -6.574604000 | -2.033027000 | -2.824475000 | H | -5.475688000 | -2.679966000 | -3.348326000 |
| H | -7.207808000 | -1.682775000 | 0.813364000  | H | -6.228425000 | -3.056142000 | 0.251211000  |
| H | -7.279969000 | -2.776286000 | -0.577739000 | H | -5.780855000 | -3.889318000 | -1.244771000 |
| H | -8.566883000 | -1.577777000 | -0.334142000 | H | -7.470008000 | -3.409637000 | -0.976500000 |
| H | -8.183410000 | 0.582190000  | 1.069039000  | H | -8.270407000 | -1.517178000 | 0.518961000  |
| H | -7.111945000 | 2.001453000  | 1.022289000  | H | -7.894815000 | 0.193235000  | 0.820512000  |
| H | -6.440482000 | 0.400043000  | 1.383770000  | H | -6.670470000 | -1.046280000 | 1.132659000  |
| H | -7.737188000 | 1.464127000  | -2.595277000 | H | -7.838770000 | 0.099441000  | -2.868404000 |
| H | -8.072656000 | 2.498127000  | -1.197971000 | H | -8.702216000 | 0.661010000  | -1.427952000 |
| H | -8.965750000 | 0.977231000  | -1.400177000 | H | -8.873738000 | -1.024474000 | -1.954077000 |
| B | -4.717157000 | 0.304827000  | -0.927326000 | B | -4.783902000 | -0.018414000 | -1.062907000 |
| H | -2.066954000 | -0.769493000 | -2.080726000 | H | -1.752732000 | 0.709542000  | -2.112084000 |
| C | 1.823169000  | 2.389569000  | 2.131359000  | C | 1.565144000  | 2.709378000  | 1.610170000  |
| C | 2.863122000  | 3.052732000  | 2.798741000  | C | 2.474433000  | 3.659862000  | 2.093247000  |
| C | 0.605227000  | 2.184861000  | 2.792716000  | C | 0.415755000  | 2.415827000  | 2.356053000  |
| C | 2.674952000  | 3.534079000  | 4.093041000  | C | 2.223893000  | 4.328823000  | 3.290495000  |
| C | 0.419866000  | 2.671899000  | 4.086207000  | C | 0.161172000  | 3.098689000  | 3.544575000  |
| C | 1.450207000  | 3.350054000  | 4.736102000  | C | 1.062351000  | 4.054647000  | 4.013279000  |
| H | 3.832310000  | 3.183171000  | 2.306533000  | H | 3.390163000  | 3.872646000  | 1.531711000  |
| H | -0.196359000 | 1.614422000  | 2.312474000  | H | -0.268731000 | 1.634975000  | 2.003465000  |
| H | 3.491333000  | 4.049490000  | 4.605061000  | H | 2.940155000  | 5.065914000  | 3.662253000  |
| H | -0.535761000 | 2.506919000  | 4.589732000  | H | -0.744234000 | 2.874199000  | 4.113912000  |
| H | 1.304906000  | 3.725875000  | 5.751876000  | H | 0.864917000  | 4.581430000  | 4.950243000  |
| C | 1.934213000  | 3.204062000  | -0.664599000 | C | 1.284013000  | 3.030421000  | -1.241080000 |
| C | 2.327049000  | 4.496654000  | -0.295245000 | C | 1.402616000  | 4.420010000  | -1.112441000 |
| C | 1.430588000  | 2.994956000  | -1.955789000 | C | 0.681188000  | 2.511954000  | -2.395217000 |
| C | 2.244899000  | 5.546508000  | -1.209424000 | C | 0.929115000  | 5.265969000  | -2.114290000 |
| C | 1.362214000  | 4.038510000  | -2.875320000 | C | 0.210770000  | 3.353751000  | -3.400680000 |
| C | 1.773967000  | 5.317496000  | -2.503020000 | C | 0.331736000  | 4.735573000  | -3.258112000 |
| H | 2.696447000  | 4.687088000  | 0.716707000  | H | 1.855417000  | 4.846929000  | -0.212270000 |
| H | 1.059793000  | 1.998033000  | -2.229964000 | H | 0.569582000  | 1.423012000  | -2.488621000 |
| H | 2.551744000  | 6.551485000  | -0.909491000 | H | 1.019956000  | 6.348712000  | -1.998009000 |
| H | 0.961179000  | 3.857057000  | -3.875175000 | H | -0.263337000 | 2.931752000  | -4.290073000 |
| H | 1.712449000  | 6.142533000  | -3.216814000 | H | -0.047244000 | 5.401679000  | -4.036669000 |
| C | 0.928370000  | -2.859921000 | -1.812627000 | C | 1.721735000  | -3.276413000 | -0.888666000 |
| C | 1.176711000  | -3.135599000 | -3.164626000 | C | 2.177053000  | -4.132796000 | -1.899148000 |
| C | -0.203598000 | -3.424421000 | -1.199470000 | C | 0.556370000  | -3.614699000 | -0.181420000 |
| C | 0.317567000  | -3.965519000 | -3.886187000 | C | 1.486947000  | -5.312589000 | -2.183180000 |
| C | -1.050625000 | -4.258778000 | -1.923559000 | C | -0.127066000 | -4.792447000 | -0.466402000 |
| C | -0.796221000 | -4.531057000 | -3.268980000 | C | 0.338503000  | -5.647724000 | -1.467055000 |
| H | 2.045593000  | -2.700785000 | -3.665692000 | H | 3.072877000  | -3.880960000 | -2.473097000 |
| H | -0.438983000 | -3.204393000 | -0.152622000 | H | 0.179133000  | -2.930389000 | 0.584644000  |
| H | 0.524928000  | -4.170496000 | -4.939391000 | H | 1.850883000  | -5.973350000 | -2.974150000 |
| H | -1.925322000 | -4.689400000 | -1.429152000 | H | -1.037588000 | -5.028828000 | 0.090456000  |
| H | -1.467470000 | -5.180557000 | -3.836092000 | H | -0.198887000 | -6.571488000 | -1.695834000 |
| C | 3.407883000  | -1.452621000 | -1.906029000 | C | 3.851714000  | -1.512935000 | -1.678091000 |
| C | 4.351224000  | -2.477765000 | -2.064361000 | C | 5.020236000  | -2.286842000 | -1.630030000 |
| C | 3.582870000  | -0.254185000 | -2.603567000 | C | 3.708546000  | -0.567344000 | -2.698423000 |
| C | 5.441976000  | -2.304493000 | -2.912145000 | C | 6.013386000  | -2.126352000 | -2.593307000 |
| C | 4.672182000  | -0.081108000 | -3.456869000 | C | 4.700174000  | -0.406936000 | -3.665412000 |
| C | 5.602317000  | -1.106627000 | -3.612594000 | C | 5.853620000  | -1.187294000 | -3.614473000 |
| H | 4.226543000  | -3.419922000 | -1.520930000 | H | 5.152813000  | -3.022013000 | -0.829469000 |
| H | 2.860061000  | 0.555992000  | -2.456296000 | H | 2.810369000  | 0.062033000  | -2.710868000 |
| H | 6.171968000  | -3.109102000 | -3.030278000 | H | 6.919345000  | -2.736133000 | -2.547708000 |
| H | 4.798373000  | 0.863856000  | -3.991237000 | H | 4.576579000  | 0.341068000  | -4.452610000 |
| H | 6.459164000  | -0.972804000 | -4.277394000 | H | 6.635238000  | -1.059573000 | -4.367463000 |
| C | -2.614005000 | -0.857566000 | 2.962787000  | C | -2.914893000 | -0.575433000 | 2.714804000  |
| C | -1.932257000 | -2.259374000 | 2.806107000  | C | -2.316591000 | -2.030051000 | 2.628639000  |
| C | -4.027145000 | -0.836885000 | 2.393188000  | C | -4.411262000 | -0.547733000 | 2.448671000  |
| O | -1.793185000 | -0.030737000 | 2.144777000  | O | -2.302289000 | 0.092356000  | 1.596552000  |
| C | -2.612332000 | -0.315222000 | 4.379569000  | C | -2.570169000 | 0.177077000  | 3.980721000  |
| O | -1.493219000 | -2.221791000 | 1.452701000  | O | -2.017886000 | -2.153728000 | 1.222291000  |

|                                                  |              |              |              |
|--------------------------------------------------|--------------|--------------|--------------|
| C                                                | -2.867995000 | -3.436777000 | 2.991137000  |
| C                                                | -0.708775000 | -2.402277000 | 3.707722000  |
| H                                                | -3.669757000 | -3.433218000 | 2.241822000  |
| H                                                | -3.326748000 | -3.429140000 | 3.991449000  |
| H                                                | -2.317444000 | -4.382158000 | 2.884218000  |
| H                                                | -0.051360000 | -1.523213000 | 3.627188000  |
| H                                                | -0.127335000 | -3.280601000 | 3.392087000  |
| H                                                | -0.979361000 | -2.533318000 | 4.765884000  |
| H                                                | -3.149519000 | -0.986407000 | 5.067141000  |
| H                                                | -3.113746000 | 0.662983000  | 4.412265000  |
| H                                                | -1.591491000 | -0.177489000 | 4.758346000  |
| H                                                | -4.065727000 | -1.296424000 | 1.395510000  |
| H                                                | -4.347846000 | 0.210468000  | 2.290061000  |
| H                                                | -4.752542000 | -1.355138000 | 3.039758000  |
| B                                                | -1.108297000 | -0.864744000 | 1.185057000  |
| H                                                | 0.173743000  | -0.667677000 | 1.337964000  |
| <b><sup>3</sup>Int_10</b> , -4750.91957, NImag=0 |              |              |              |
| Co                                               | -0.603419000 | 0.148835000  | -0.737371000 |
| P                                                | -1.899656000 | 1.754079000  | 0.045662000  |
| C                                                | -3.504265000 | 1.181837000  | 0.730339000  |
| C                                                | -4.284523000 | 0.353063000  | -0.095339000 |
| C                                                | -3.899891000 | 1.330523000  | 2.065187000  |
| C                                                | -5.386518000 | -0.341881000 | 0.398494000  |
| C                                                | -5.008263000 | 0.649370000  | 2.568607000  |
| C                                                | -5.740579000 | -0.197257000 | 1.739080000  |
| H                                                | -3.310455000 | 1.965136000  | 2.732845000  |
| H                                                | -5.952167000 | -0.998388000 | -0.267221000 |
| H                                                | -5.287872000 | 0.766987000  | 3.617987000  |
| H                                                | -6.596725000 | -0.750190000 | 2.132883000  |
| P                                                | -1.794077000 | -1.713155000 | -0.510482000 |
| C                                                | -3.135799000 | -1.980617000 | -1.751789000 |
| C                                                | -4.005381000 | -0.921349000 | -2.071778000 |
| C                                                | -3.266629000 | -3.164592000 | -2.492064000 |
| C                                                | -4.941754000 | -1.028896000 | -3.096751000 |
| C                                                | -4.209933000 | -3.287330000 | -3.511426000 |
| C                                                | -5.043285000 | -2.214229000 | -3.821453000 |
| O                                                | -3.910764000 | 0.280199000  | -1.411402000 |
| H                                                | -2.603193000 | -4.006267000 | -2.273824000 |
| H                                                | -5.577480000 | -0.168027000 | -3.312275000 |
| H                                                | -4.285506000 | -4.222779000 | -4.070168000 |
| H                                                | -5.776404000 | -2.297895000 | -4.626905000 |
| H                                                | 1.670275000  | 0.197994000  | -2.407236000 |
| C                                                | 4.718204000  | -0.702333000 | -1.559921000 |
| C                                                | 5.977921000  | -0.077674000 | -1.569383000 |
| C                                                | 4.680960000  | -2.101414000 | -1.693282000 |
| C                                                | 7.146788000  | -0.825982000 | -1.674540000 |
| C                                                | 5.856671000  | -2.838157000 | -1.808797000 |
| C                                                | 7.102158000  | -2.213712000 | -1.792692000 |
| H                                                | 6.042506000  | 1.005379000  | -1.487999000 |
| H                                                | 3.735706000  | -2.640874000 | -1.668418000 |
| H                                                | 8.108076000  | -0.305885000 | -1.673992000 |
| H                                                | 5.788386000  | -3.925167000 | -1.903107000 |
| H                                                | 8.020809000  | -2.797655000 | -1.878884000 |
| N                                                | 3.541793000  | 0.079655000  | -1.440103000 |
| C                                                | 2.255138000  | -0.470772000 | -1.759179000 |
| O                                                | 1.425201000  | -0.601676000 | -0.589425000 |
| C                                                | 3.930584000  | 3.326144000  | 0.193086000  |
| C                                                | 2.665804000  | 3.524778000  | -0.699465000 |
| C                                                | 4.936860000  | 4.451924000  | 0.127726000  |
| O                                                | 4.522517000  | 2.133112000  | -0.385231000 |
| C                                                | 3.575422000  | 2.987734000  | 1.633058000  |
| O                                                | 2.313618000  | 2.150296000  | -1.009557000 |
| C                                                | 2.976627000  | 4.212840000  | -2.019141000 |
| C                                                | 1.511648000  | 4.202183000  | -0.001742000 |
| H                                                | 3.833679000  | 3.749048000  | -2.527938000 |
| H                                                | 3.196246000  | 5.280350000  | -1.879947000 |
| H                                                | 2.106179000  | 4.131852000  | -2.684029000 |
| H                                                | 1.204196000  | 3.660993000  | 0.898721000  |
| H                                                | 0.639056000  | 4.264570000  | -0.667273000 |
| H                                                | 1.784624000  | 5.227776000  | 0.288403000  |
| H                                                | 3.181396000  | 3.859011000  | 2.174973000  |
| H                                                | 4.474688000  | 2.635821000  | 2.157586000  |
| H                                                | 2.816067000  | 2.191156000  | 1.679846000  |
| H                                                | 5.321890000  | 4.596249000  | -0.888847000 |
| H                                                | 5.792794000  | 4.237969000  | 0.781587000  |
| H                                                | 4.485628000  | 5.396373000  | 0.464501000  |
| B                                                | 3.488227000  | 1.437320000  | -0.958685000 |
| H                                                | 2.351976000  | -1.444526000 | -2.253210000 |
| C                                                | -2.387218000 | 3.075748000  | -1.133237000 |
| C                                                | -3.569096000 | 3.818050000  | -1.016570000 |
| C                                                | -1.528151000 | 3.322288000  | -2.211192000 |
| C                                                | -3.872331000 | 4.810690000  | -1.948031000 |
| C                                                | -1.824165000 | 4.325637000  | -3.132152000 |
| C                                                | -2.996449000 | 5.071383000  | -3.002234000 |

|                                                 |              |              |              |
|-------------------------------------------------|--------------|--------------|--------------|
| C                                               | -3.292010000 | -3.127182000 | 3.005837000  |
| C                                               | -1.017846000 | -2.189963000 | 3.402330000  |
| H                                               | -4.172323000 | -3.139206000 | 2.351091000  |
| H                                               | -3.631506000 | -3.012751000 | 4.045941000  |
| H                                               | -2.803589000 | -4.107561000 | 2.921765000  |
| H                                               | -0.285629000 | -1.422950000 | 3.112312000  |
| H                                               | -0.573913000 | -3.168023000 | 3.167140000  |
| H                                               | -1.184323000 | -2.147939000 | 4.488242000  |
| H                                               | -2.975317000 | -0.332270000 | 4.867595000  |
| H                                               | -3.002185000 | 1.187051000  | 3.944726000  |
| H                                               | -1.484781000 | 0.278846000  | 4.104752000  |
| H                                               | -4.636764000 | -1.098878000 | 1.523786000  |
| H                                               | -4.742739000 | 0.491763000  | 2.309809000  |
| H                                               | -4.997118000 | -0.989085000 | 3.267983000  |
| B                                               | -1.877694000 | -0.880072000 | 0.726266000  |
| H                                               | 0.371350000  | -0.664207000 | 1.317716000  |
| <b><sup>3</sup>TS_11</b> , -4750.88847, NImag=1 |              |              |              |
| Co                                              | -0.806162000 | -0.008602000 | -1.152363000 |
| P                                               | -1.601587000 | 1.889717000  | -0.136540000 |
| C                                               | -3.370059000 | 1.799104000  | 0.341197000  |
| C                                               | -4.248187000 | 1.098571000  | -0.505903000 |
| C                                               | -3.884628000 | 2.287404000  | 1.549631000  |
| C                                               | -5.591946000 | 0.922206000  | -0.175552000 |
| C                                               | -5.222416000 | 2.104468000  | 1.895698000  |
| C                                               | -6.077114000 | 1.429453000  | 1.027013000  |
| H                                               | -3.219665000 | 2.807612000  | 2.243353000  |
| H                                               | -6.245593000 | 0.374705000  | -0.858113000 |
| H                                               | -5.593580000 | 2.487736000  | 2.848399000  |
| H                                               | -7.128464000 | 1.285560000  | 1.287531000  |
| P                                               | -2.210093000 | -1.610743000 | -0.382534000 |
| C                                               | -3.613868000 | -1.785914000 | -1.560113000 |
| C                                               | -4.164262000 | -0.619903000 | -2.123275000 |
| C                                               | -4.056869000 | -3.016207000 | -2.063667000 |
| C                                               | -5.097950000 | -0.673402000 | -3.152873000 |
| C                                               | -5.006234000 | -3.082257000 | -3.082823000 |
| C                                               | -5.521876000 | -1.910837000 | -3.634325000 |
| O                                               | -3.729731000 | 0.616066000  | -1.682789000 |
| H                                               | -3.634469000 | -3.941301000 | -1.661749000 |
| H                                               | -5.476280000 | 0.263258000  | -3.567164000 |
| H                                               | -5.332228000 | -4.055095000 | -3.457036000 |
| H                                               | -6.253730000 | -1.956771000 | -4.443839000 |
| H                                               | 1.643133000  | 0.809227000  | -2.158850000 |
| C                                               | 4.499260000  | -0.979016000 | -1.919148000 |
| C                                               | 5.867562000  | -0.679201000 | -1.859682000 |
| C                                               | 4.105542000  | -2.289233000 | -2.227835000 |
| C                                               | 6.816725000  | -1.673986000 | -2.075810000 |
| C                                               | 5.063478000  | -3.273255000 | -2.449978000 |
| C                                               | 6.424363000  | -2.979409000 | -2.369524000 |
| H                                               | 6.191799000  | 0.337496000  | -1.641993000 |
| H                                               | 3.050740000  | -2.556101000 | -2.250017000 |
| H                                               | 7.877350000  | -1.417600000 | -2.022528000 |
| H                                               | 4.734711000  | -4.290410000 | -2.678466000 |
| H                                               | 7.170706000  | -3.757799000 | -2.541073000 |
| N                                               | 3.542957000  | 0.056609000  | -1.717491000 |
| C                                               | 2.249917000  | -0.088076000 | -2.084575000 |
| O                                               | 0.974703000  | -0.374460000 | -0.325763000 |
| C                                               | 4.554600000  | 2.547668000  | 0.769902000  |
| C                                               | 3.558077000  | 3.353051000  | -0.126658000 |
| C                                               | 5.830435000  | 3.281852000  | 1.112115000  |
| O                                               | 4.881291000  | 1.411149000  | -0.081235000 |
| C                                               | 3.892539000  | 1.985694000  | 2.017425000  |
| O                                               | 2.929102000  | 2.293079000  | -0.896807000 |
| C                                               | 4.256183000  | 4.265022000  | -1.121281000 |
| C                                               | 2.495810000  | 4.101428000  | 0.643143000  |
| H                                               | 5.048065000  | 3.738626000  | -1.672599000 |
| H                                               | 4.703417000  | 5.138369000  | -0.627120000 |
| H                                               | 3.523672000  | 4.630873000  | -1.853222000 |
| H                                               | 1.858097000  | 3.417791000  | 1.215128000  |
| H                                               | 1.848495000  | 4.670397000  | -0.038565000 |
| H                                               | 2.953780000  | 4.816483000  | 1.342846000  |
| H                                               | 3.623577000  | 2.780061000  | 2.727747000  |
| H                                               | 4.585935000  | 1.299718000  | 2.523137000  |
| H                                               | 2.975734000  | 1.425649000  | 1.774250000  |
| H                                               | 6.396810000  | 3.562739000  | 0.216192000  |
| H                                               | 6.478086000  | 2.649008000  | 1.732823000  |
| H                                               | 5.609438000  | 4.195745000  | 1.682121000  |
| B                                               | 3.809002000  | 1.249995000  | -0.908762000 |
| H                                               | 1.927703000  | -0.966927000 | -2.639648000 |
| C                                               | -1.524012000 | 3.325430000  | -1.275759000 |
| C                                               | -2.625772000 | 4.105415000  | -1.642248000 |
| C                                               | -0.266114000 | 3.619359000  | -1.825577000 |
| C                                               | -2.470618000 | 5.167779000  | -2.534663000 |
| C                                               | -0.111896000 | 4.688302000  | -2.703089000 |
| C                                               | -1.215796000 | 5.464974000  | -3.062564000 |

|                     |              |              |              |                |              |              |              |
|---------------------|--------------|--------------|--------------|----------------|--------------|--------------|--------------|
| H                   | -4.260747000 | 3.614566000  | -0.192292000 | H              | -3.613511000 | 3.884889000  | -1.226658000 |
| H                   | -0.644873000 | 2.683097000  | -2.328241000 | H              | 0.600890000  | 3.004093000  | -1.556218000 |
| H                   | -4.799616000 | 5.381452000  | -1.852822000 | H              | -3.338842000 | 5.768604000  | -2.816696000 |
| H                   | -1.146633000 | 4.512079000  | -3.969643000 | H              | 0.874110000  | 4.908827000  | -3.121038000 |
| H                   | -3.235856000 | 5.848366000  | -3.732609000 | H              | -1.097554000 | 6.297327000  | -3.760370000 |
| C                   | -1.241858000 | 2.717450000  | 1.478735000  | C              | -0.815198000 | 2.579320000  | 1.370121000  |
| C                   | -1.567367000 | 4.050486000  | 1.759428000  | C              | -0.911589000 | 3.926276000  | 1.749812000  |
| C                   | -0.317158000 | 2.061520000  | 2.305008000  | C              | -0.080374000 | 1.694157000  | 2.166265000  |
| C                   | -0.985196000 | 4.709882000  | 2.842222000  | C              | -0.301175000 | 4.369235000  | 2.921795000  |
| C                   | 0.254562000  | 2.716034000  | 3.395423000  | C              | 0.526465000  | 2.138253000  | 3.340907000  |
| C                   | -0.075154000 | 4.044830000  | 3.664658000  | C              | 0.415221000  | 3.475055000  | 3.721966000  |
| H                   | -2.272821000 | 4.586911000  | 1.118287000  | H              | -1.469115000 | 4.631309000  | 1.124360000  |
| H                   | -0.016913000 | 1.033881000  | 2.067011000  | H              | 0.036641000  | 0.657086000  | 1.845502000  |
| H                   | -1.243505000 | 5.752587000  | 3.044317000  | H              | -0.383137000 | 5.419383000  | 3.213895000  |
| H                   | 0.979000000  | 2.191931000  | 4.025020000  | H              | 1.101775000  | 1.431611000  | 3.946249000  |
| H                   | 0.380580000  | 4.564551000  | 4.511254000  | H              | 0.892664000  | 3.827249000  | 4.640259000  |
| C                   | -0.660410000 | -3.113890000 | -0.876535000 | C              | -1.440085000 | -3.275034000 | -0.367204000 |
| C                   | -0.395495000 | -4.169006000 | 0.006442000  | C              | -1.930049000 | -4.343684000 | 0.398604000  |
| C                   | 0.082663000  | -3.031876000 | -2.068189000 | C              | -0.267752000 | -3.451248000 | -1.115182000 |
| C                   | 0.592974000  | -5.111519000 | -0.287840000 | C              | -1.265291000 | -5.568378000 | 0.404668000  |
| C                   | 1.056126000  | -3.980661000 | -2.365395000 | C              | 0.399848000  | -4.674484000 | -1.100139000 |
| C                   | 1.322010000  | -5.021444000 | -1.471351000 | C              | -0.098063000 | -5.734756000 | -0.343227000 |
| H                   | -0.965940000 | -4.258992000 | 0.935424000  | H              | -2.833618000 | -4.211510000 | 1.002019000  |
| H                   | -0.106576000 | -2.191389000 | -2.747015000 | H              | 0.118579000  | -2.604103000 | -1.693410000 |
| H                   | 0.789286000  | -5.925077000 | 0.416120000  | H              | -1.654502000 | -6.395226000 | 1.003959000  |
| H                   | 1.620355000  | -3.904164000 | -3.299465000 | H              | 1.326918000  | -4.793567000 | -1.667399000 |
| H                   | 2.093380000  | -5.760746000 | -1.700566000 | H              | 0.429276000  | -6.692165000 | -0.327658000 |
| C                   | -2.599400000 | -2.271253000 | 1.053288000  | C              | -3.008633000 | -1.564210000 | 1.270364000  |
| C                   | -3.545139000 | -3.304059000 | 1.122181000  | C              | -4.379564000 | -1.722301000 | 1.501617000  |
| C                   | -2.229083000 | -1.612221000 | 2.229631000  | C              | -2.162453000 | -1.293538000 | 2.357391000  |
| C                   | -4.096293000 | -3.675444000 | 2.346314000  | C              | -4.895570000 | -1.603469000 | 2.793241000  |
| C                   | -2.777808000 | -1.984559000 | 3.456838000  | C              | -2.677059000 | -1.189161000 | 3.646325000  |
| C                   | -3.711482000 | -3.017300000 | 3.516833000  | C              | -4.048164000 | -1.337762000 | 3.867282000  |
| H                   | -3.852754000 | -3.821063000 | 0.207263000  | H              | -5.053329000 | -1.933598000 | 0.665241000  |
| H                   | -1.504647000 | -0.790683000 | 2.161964000  | H              | -1.086454000 | -1.170404000 | 2.186816000  |
| H                   | -4.832356000 | -4.482355000 | 2.389736000  | H              | -5.970212000 | -1.717712000 | 2.958747000  |
| H                   | -2.484323000 | -1.454869000 | 4.367600000  | H              | -2.003312000 | -0.979933000 | 4.482163000  |
| H                   | -4.148515000 | -3.306668000 | 4.475841000  | H              | -4.455616000 | -1.242990000 | 4.876770000  |
| C                   | 3.338723000  | -2.148085000 | 1.972962000  | C              | 3.082871000  | -2.685375000 | 1.373577000  |
| C                   | 2.066741000  | -1.660746000 | 2.761129000  | C              | 2.027523000  | -2.322720000 | 2.478343000  |
| C                   | 4.497938000  | -1.165792000 | 2.044023000  | C              | 4.384422000  | -1.910857000 | 1.521920000  |
| O                   | 2.870777000  | -2.132268000 | 0.602910000  | O              | 2.440902000  | -2.218585000 | 0.178876000  |
| C                   | 3.796358000  | -3.549458000 | 2.309091000  | C              | 3.366593000  | -4.167497000 | 1.236113000  |
| O                   | 1.395287000  | -0.828604000 | 1.777006000  | O              | 1.380585000  | -1.166017000 | 1.919736000  |
| C                   | 2.364692000  | -0.804911000 | 3.972892000  | C              | 2.621241000  | -1.946123000 | 3.819858000  |
| C                   | 1.127774000  | -2.796726000 | 3.120102000  | C              | 0.973622000  | -3.406451000 | 2.642126000  |
| H                   | 2.909683000  | 0.109873000  | 3.706236000  | H              | 3.266800000  | -1.061333000 | 3.745529000  |
| H                   | 2.961899000  | -1.361066000 | 4.709983000  | H              | 3.213921000  | -2.772828000 | 4.238869000  |
| H                   | 1.426170000  | -0.507303000 | 4.461601000  | H              | 1.820268000  | -1.715217000 | 4.536541000  |
| H                   | 0.899944000  | -3.415899000 | 2.241760000  | H              | 0.541409000  | -3.684015000 | 1.669864000  |
| H                   | 0.178996000  | -2.392292000 | 3.496886000  | H              | 0.156548000  | -3.040932000 | 3.279939000  |
| H                   | 1.554778000  | -3.443457000 | 3.899012000  | H              | 1.382911000  | -4.315171000 | 3.106574000  |
| H                   | 4.082543000  | -3.627318000 | 3.367986000  | H              | 3.789713000  | -4.577785000 | 2.165347000  |
| H                   | 4.675458000  | -3.808865000 | 1.703790000  | H              | 4.099280000  | -4.334436000 | 0.433798000  |
| H                   | 3.017423000  | -4.293228000 | 2.102194000  | H              | 2.460853000  | -4.734644000 | 0.987304000  |
| H                   | 4.185097000  | -0.149265000 | 1.760353000  | H              | 4.198464000  | -0.828325000 | 1.571543000  |
| H                   | 5.280804000  | -1.472591000 | 1.336574000  | H              | 5.023013000  | -2.092083000 | 0.645941000  |
| H                   | 4.941053000  | -1.123332000 | 3.048692000  | H              | 4.947710000  | -2.208827000 | 2.417972000  |
| B                   | 1.880642000  | -1.202180000 | 0.553195000  | B              | 1.544441000  | -1.212066000 | 0.528255000  |
| H                   | -0.672062000 | 0.272676000  | -2.363104000 | H              | -0.650936000 | -0.391110000 | -2.743050000 |
| <sup>3</sup> Int_11 | -4750.95315  | NImag=0      |              | <sup>3</sup> D | -4013.96929  | NImag=0      |              |
| Co                  | -0.051156000 | -0.134949000 | -0.856701000 | Co             | -0.250450000 | -0.436946000 | -1.022000000 |
| P                   | -0.568527000 | -2.307727000 | 0.163808000  | P              | 1.697901000  | -1.129300000 | -0.201132000 |
| C                   | 0.804157000  | -3.076307000 | 1.103202000  | C              | 2.553080000  | -0.075395000 | 1.028667000  |
| C                   | 2.038859000  | -3.179036000 | 0.443857000  | C              | 2.748426000  | 1.275625000  | 0.690927000  |
| C                   | 0.762998000  | -3.394374000 | 2.466251000  | C              | 2.830780000  | -0.463047000 | 2.345159000  |
| C                   | 3.206945000  | -3.529449000 | 1.118179000  | C              | 3.202371000  | 2.205774000  | 1.622379000  |
| C                   | 1.919424000  | -3.765563000 | 3.150821000  | C              | 3.284289000  | 0.458598000  | 3.288493000  |
| C                   | 3.139964000  | -3.815144000 | 2.480568000  | C              | 3.468419000  | 1.791223000  | 2.926381000  |
| H                   | -0.182700000 | -3.326133000 | 3.009268000  | H              | 2.665773000  | -1.501859000 | 2.643553000  |
| H                   | 4.157920000  | -3.566533000 | 0.582414000  | H              | 3.333066000  | 3.249149000  | 1.325958000  |
| H                   | 1.867679000  | -3.998620000 | 4.216379000  | H              | 3.484276000  | 0.134022000  | 4.311809000  |
| H                   | 4.053418000  | -4.080099000 | 3.018086000  | H              | 3.817411000  | 2.519361000  | 3.662262000  |
| P                   | 2.327964000  | 0.065659000  | -0.553308000 | P              | -0.507541000 | 1.618691000  | -0.142707000 |
| C                   | 3.479581000  | -1.106437000 | -1.417855000 | C              | 0.534955000  | 3.041583000  | -0.677180000 |
| C                   | 3.140363000  | -2.465424000 | -1.517575000 | C              | 1.915710000  | 2.850209000  | -0.874979000 |
| C                   | 4.678554000  | -0.708360000 | -2.030884000 | C              | 0.002045000  | 4.292925000  | -1.020109000 |
| C                   | 3.911832000  | -3.373188000 | -2.239153000 | C              | 2.725478000  | 3.855142000  | -1.397884000 |
| C                   | 5.473110000  | -1.610883000 | -2.735369000 | C              | 0.807432000  | 5.309623000  | -1.530860000 |
| C                   | 5.082031000  | -2.943031000 | -2.857430000 | C              | 2.169844000  | 5.089824000  | -1.726036000 |
| O                   | 2.000888000  | -2.922861000 | -0.901974000 | O              | 2.479753000  | 1.622158000  | -0.611934000 |
| H                   | 4.998280000  | 0.333770000  | -1.965692000 | H              | -1.069817000 | 4.469036000  | -0.895373000 |
| H                   | 3.579049000  | -4.411543000 | -2.294603000 | H              | 3.786812000  | 3.646001000  | -1.545903000 |
| H                   | 6.399263000  | -1.264813000 | -3.198986000 | H              | 0.363898000  | 6.273979000  | -1.787348000 |

|   |              |              |              |   |              |              |              |
|---|--------------|--------------|--------------|---|--------------|--------------|--------------|
| H | 5.691745000  | -3.650103000 | -3.424082000 | H | 2.803416000  | 5.878542000  | -2.137638000 |
| H | -1.637050000 | -0.586651000 | -2.896949000 | O | -1.478858000 | -1.098468000 | -2.386607000 |
| C | -1.525206000 | 2.685095000  | -2.309411000 | C | 2.919452000  | -1.298288000 | -1.559170000 |
| C | -0.159458000 | 2.988967000  | -2.220960000 | C | 4.292953000  | -1.071071000 | -1.409265000 |
| C | -2.430806000 | 3.743122000  | -2.507165000 | C | 2.418282000  | -1.658225000 | -2.817899000 |
| C | 0.291301000  | 4.300631000  | -2.340039000 | C | 5.152505000  | -1.220679000 | -2.496334000 |
| C | -1.972225000 | 5.051549000  | -2.616355000 | C | 3.280450000  | -1.813955000 | -3.901550000 |
| C | -0.609427000 | 5.344124000  | -2.539747000 | C | 4.648841000  | -1.596377000 | -3.742031000 |
| H | 0.553363000  | 2.186805000  | -2.026345000 | H | 4.691721000  | -0.765810000 | -0.436452000 |
| H | -3.495516000 | 3.530238000  | -2.588262000 | H | 1.339282000  | -1.808958000 | -2.945252000 |
| H | 1.361846000  | 4.502859000  | -2.253944000 | H | 6.222971000  | -1.039694000 | -2.370988000 |
| H | -2.695707000 | 5.854950000  | -2.778357000 | H | 2.878949000  | -2.096849000 | -4.877356000 |
| H | -0.255933000 | 6.373768000  | -2.630018000 | H | 5.324586000  | -1.711471000 | -4.592903000 |
| N | -1.969141000 | 1.352877000  | -2.235898000 | C | 1.733673000  | -2.782088000 | 0.596854000  |
| C | -1.057421000 | 0.289639000  | -2.582617000 | C | 2.918936000  | -3.495430000 | 0.823826000  |
| O | -0.883566000 | 0.965742000  | 0.460789000  | C | 0.510531000  | -3.348631000 | 0.977477000  |
| C | -5.005765000 | 1.141824000  | -0.231141000 | C | 2.881501000  | -4.745142000 | 1.437581000  |
| C | -4.882699000 | -0.295106000 | -0.832930000 | C | 0.475833000  | -4.598977000 | 1.595873000  |
| C | -6.389038000 | 1.746705000  | -0.324411000 | C | 1.659716000  | -5.296991000 | 1.828018000  |
| O | -4.108004000 | 1.894846000  | -1.079712000 | H | 3.879208000  | -3.069208000 | 0.516575000  |
| C | -4.456024000 | 1.233113000  | 1.181932000  | H | -0.418168000 | -2.806686000 | 0.764821000  |
| O | -3.503145000 | -0.310262000 | -1.278856000 | H | 3.810101000  | -5.294830000 | 1.609577000  |
| C | -5.749442000 | -0.493451000 | -2.067188000 | H | -0.482616000 | -5.035087000 | 1.889128000  |
| C | -5.105222000 | -1.411709000 | 0.159620000  | H | 1.632310000  | -6.278771000 | 2.306880000  |
| H | -5.618061000 | 0.325902000  | -2.787867000 | C | -2.205694000 | 2.232663000  | -0.478777000 |
| H | -6.816528000 | -0.559085000 | -1.812568000 | C | -2.986092000 | 2.936179000  | 0.448142000  |
| H | -5.464616000 | -1.429941000 | -2.566982000 | C | -2.759204000 | 1.899978000  | -1.724841000 |
| H | -4.411845000 | -1.346909000 | 1.005018000  | C | -4.293327000 | 3.304557000  | 0.131880000  |
| H | -4.961989000 | -2.390407000 | -0.320987000 | C | -4.063159000 | 2.276597000  | -2.040538000 |
| H | -6.132544000 | -1.379064000 | 0.552333000  | C | -4.833674000 | 2.977202000  | -1.111986000 |
| H | -5.103460000 | 0.721830000  | 1.909345000  | H | -2.577349000 | 3.186785000  | 1.431508000  |
| H | -4.368943000 | 2.287846000  | 1.473301000  | H | -2.175067000 | 1.305304000  | -2.434660000 |
| H | -3.444608000 | 0.806028000  | 1.237076000  | H | -4.895763000 | 3.846460000  | 0.865167000  |
| H | -6.730148000 | 1.837737000  | -1.363009000 | H | -4.483693000 | 2.002079000  | -3.010681000 |
| H | -6.391144000 | 2.752408000  | 0.116385000  | H | -5.860661000 | 3.261198000  | -1.354131000 |
| H | -7.119080000 | 1.137828000  | 0.228951000  | C | -0.408521000 | 1.666104000  | 1.689381000  |
| B | -3.166407000 | 1.004932000  | -1.527930000 | C | -0.115775000 | 2.814656000  | 2.434741000  |
| H | -0.414491000 | 0.609007000  | -3.414452000 | C | -0.659068000 | 0.461007000  | 2.360919000  |
| C | 0.727711000  | 3.724743000  | 2.046134000  | C | -0.091571000 | 2.761081000  | 3.827964000  |
| C | -0.527190000 | 3.451720000  | 2.944596000  | C | -0.643871000 | 0.410922000  | 3.753090000  |
| C | 0.526788000  | 4.912685000  | 1.118108000  | C | -0.360601000 | 1.562123000  | 4.488571000  |
| O | 0.780538000  | 2.541991000  | 1.234974000  | H | 0.098763000  | 3.757780000  | 1.921044000  |
| C | 2.022872000  | 3.869110000  | 2.823050000  | H | -0.861377000 | -0.440303000 | 1.768899000  |
| O | -1.353251000 | 2.657526000  | 2.091062000  | H | 0.140692000  | 3.661635000  | 4.401977000  |
| C | -1.283504000 | 4.695179000  | 3.364149000  | H | -0.840248000 | -0.534447000 | 4.265752000  |
| C | -0.186641000 | 2.598759000  | 4.160909000  | H | -0.339900000 | 1.523151000  | 5.580346000  |
| H | -1.676031000 | 5.240070000  | 2.497125000  | C | -4.248837000 | -2.552458000 | -0.659070000 |
| H | -0.641691000 | 5.376474000  | 3.942802000  | C | -3.455715000 | -1.815893000 | 0.477438000  |
| H | -2.138399000 | 4.422332000  | 3.998219000  | C | -3.941149000 | -4.043559000 | -0.697130000 |
| H | 0.391948000  | 1.711053000  | 3.864345000  | O | -3.714206000 | -1.971442000 | -1.854698000 |
| H | -1.116933000 | 2.252909000  | 4.632631000  | C | -5.744920000 | -2.318825000 | -0.624482000 |
| H | 0.394719000  | 3.148336000  | 4.915326000  | O | -2.192379000 | -1.584725000 | -0.171196000 |
| H | 1.932968000  | 4.644335000  | 3.599129000  | C | -3.236765000 | -2.640487000 | 1.729427000  |
| H | 2.843506000  | 4.174202000  | 2.158203000  | C | -4.060493000 | -0.466788000 | 0.832221000  |
| H | 2.315085000  | 2.926854000  | 3.306854000  | H | -2.685479000 | -3.565847000 | 1.521900000  |
| H | -0.421675000 | 4.832503000  | 0.567361000  | H | -4.196175000 | -2.911830000 | 2.194762000  |
| H | 1.337045000  | 4.932396000  | 0.375476000  | H | -2.662939000 | -2.065676000 | 2.471310000  |
| H | 0.536766000  | 5.869312000  | 1.660841000  | H | -4.256461000 | 0.133023000  | -0.067903000 |
| B | -0.513551000 | 2.000523000  | 1.185588000  | H | -3.359289000 | 0.098062000  | 1.464386000  |
| H | 0.403849000  | -0.958242000 | -2.035289000 | H | -5.003599000 | -0.571924000 | 1.387580000  |
| C | -1.090279000 | -3.602637000 | -1.019073000 | H | -6.179120000 | -2.657170000 | 0.328172000  |
| C | -2.161229000 | -3.302475000 | -1.875194000 | H | -6.233107000 | -2.879188000 | -1.433227000 |
| C | -0.478603000 | -4.858417000 | -1.107003000 | H | -5.991085000 | -1.258816000 | -0.762380000 |
| C | -2.614129000 | -4.249483000 | -2.791306000 | H | -2.856437000 | -4.225984000 | -0.680526000 |
| C | -0.929536000 | -5.799101000 | -2.032716000 | H | -4.334555000 | -4.469943000 | -1.629312000 |
| C | -1.998211000 | -5.498691000 | -2.875737000 | H | -4.395871000 | -4.585421000 | 0.144655000  |
| H | -2.648742000 | -2.323914000 | -1.810398000 | B | -2.424919000 | -1.536212000 | -1.588132000 |
| H | 0.352356000  | -5.110432000 | -0.442677000 |   |              |              |              |
| H | -3.452257000 | -4.006350000 | -3.449432000 |   |              |              |              |
| H | -0.443751000 | -6.776303000 | -2.090811000 |   |              |              |              |
| H | -2.351053000 | -6.237752000 | -3.598994000 |   |              |              |              |
| C | -1.885230000 | -2.370608000 | 1.438906000  |   |              |              |              |
| C | -2.034848000 | -1.278162000 | 2.305487000  |   |              |              |              |
| C | -2.669385000 | -3.515365000 | 1.640988000  |   |              |              |              |
| C | -2.945412000 | -1.337631000 | 3.360495000  |   |              |              |              |
| C | -3.582280000 | -3.567426000 | 2.692661000  |   |              |              |              |
| C | -3.720323000 | -2.480047000 | 3.557046000  |   |              |              |              |
| H | -1.460154000 | -0.365467000 | 2.125573000  |   |              |              |              |
| H | -2.563186000 | -4.375800000 | 0.973741000  |   |              |              |              |
| H | -3.059451000 | -0.473071000 | 4.019823000  |   |              |              |              |
| H | -4.189083000 | -4.464417000 | 2.839291000  |   |              |              |              |
| H | -4.436979000 | -2.523416000 | 4.380951000  |   |              |              |              |
| C | 3.017644000  | 1.653345000  | -1.159514000 |   |              |              |              |
| C | 3.508597000  | 2.640628000  | -0.300397000 |   |              |              |              |

|   |             |              |              |
|---|-------------|--------------|--------------|
| C | 3.035079000 | 1.888996000  | -2.543888000 |
| C | 4.043041000 | 3.822291000  | -0.815928000 |
| C | 3.576023000 | 3.063706000  | -3.057080000 |
| C | 4.090987000 | 4.032085000  | -2.192527000 |
| H | 3.470759000 | 2.482923000  | 0.778763000  |
| H | 2.630719000 | 1.135272000  | -3.228331000 |
| H | 4.427577000 | 4.583232000  | -0.131489000 |
| H | 3.588273000 | 3.227808000  | -4.137001000 |
| H | 4.516769000 | 4.954718000  | -2.593901000 |
| C | 2.923563000 | -0.038685000 | 1.179770000  |
| C | 4.287273000 | -0.020778000 | 1.503486000  |
| C | 1.980001000 | -0.173117000 | 2.202952000  |
| C | 4.696314000 | -0.125538000 | 2.830789000  |
| C | 2.390316000 | -0.295262000 | 3.529458000  |
| C | 3.747471000 | -0.267055000 | 3.845530000  |
| H | 5.035357000 | 0.077382000  | 0.710118000  |
| H | 0.915835000 | -0.181091000 | 1.944575000  |
| H | 5.761211000 | -0.104453000 | 3.074788000  |
| H | 1.642752000 | -0.419993000 | 4.317600000  |
| H | 4.069847000 | -0.361568000 | 4.885379000  |

<sup>3</sup>TS\_12, -4425.50564, NImag=1<sup>a</sup>

|    |              |              |              |
|----|--------------|--------------|--------------|
| Co | 0.082069000  | -0.174174000 | -0.597457000 |
| P  | -1.190119000 | 1.680802000  | -0.684207000 |
| C  | -1.332602000 | 2.639719000  | 0.874000000  |
| C  | -1.755381000 | 1.946558000  | 2.021971000  |
| C  | -0.850306000 | 3.942898000  | 1.044867000  |
| C  | -1.694731000 | 2.515006000  | 3.290866000  |
| C  | -0.780736000 | 4.524707000  | 2.310699000  |
| C  | -1.197053000 | 3.809349000  | 3.431584000  |
| H  | -0.497712000 | 4.503791000  | 0.175301000  |
| H  | -2.022205000 | 1.935416000  | 4.157610000  |
| H  | -0.387916000 | 5.537729000  | 2.420917000  |
| H  | -1.133366000 | 4.257350000  | 4.426023000  |
| P  | 0.552696000  | -0.417600000 | 1.592556000  |
| C  | -0.766650000 | -0.949009000 | 2.762445000  |
| C  | -2.028995000 | -0.327885000 | 2.705177000  |
| C  | -0.633397000 | -2.056692000 | 3.612094000  |
| C  | -3.105575000 | -0.789626000 | 3.457976000  |
| C  | -1.703301000 | -2.521238000 | 4.375641000  |
| C  | -2.943090000 | -1.889422000 | 4.297127000  |
| O  | -2.261846000 | 0.690344000  | 1.810447000  |
| H  | 0.326784000  | -2.577057000 | 3.663860000  |
| H  | -4.067012000 | -0.282435000 | 3.356207000  |
| H  | -1.567389000 | -3.387287000 | 5.026959000  |
| H  | -3.788548000 | -2.255009000 | 4.884093000  |
| O  | 0.759895000  | -1.213816000 | -2.114581000 |
| C  | -2.920310000 | 1.425869000  | -1.229722000 |
| C  | -4.040152000 | 1.878201000  | -0.524726000 |
| C  | -3.106388000 | 0.679783000  | -2.402539000 |
| C  | -5.324242000 | 1.585452000  | -0.984044000 |
| C  | -4.388167000 | 0.398585000  | -2.864564000 |
| C  | -5.501158000 | 0.846317000  | -2.152603000 |
| H  | -3.910970000 | 2.458493000  | 0.393174000  |
| H  | -2.232423000 | 0.303085000  | -2.947249000 |
| H  | -6.193185000 | 1.937617000  | -0.422501000 |
| H  | -4.520929000 | -0.189706000 | -3.775313000 |
| H  | -6.508059000 | 0.613709000  | -2.506884000 |
| C  | -0.622310000 | 2.967003000  | -1.867948000 |
| C  | -1.473576000 | 3.976461000  | -2.340366000 |
| C  | 0.708175000  | 2.934417000  | -2.304228000 |
| C  | -0.996834000 | 4.945068000  | -3.220398000 |
| C  | 1.183583000  | 3.908988000  | -3.182775000 |
| C  | 0.334296000  | 4.914941000  | -3.640411000 |
| H  | -2.518058000 | 4.003527000  | -2.014055000 |
| H  | 1.366847000  | 2.126249000  | -1.965655000 |
| H  | -1.668027000 | 5.727223000  | -3.583556000 |
| H  | 2.222553000  | 3.876128000  | -3.521209000 |
| H  | 0.706180000  | 5.673701000  | -4.333288000 |
| C  | 1.822686000  | -1.733460000 | 1.792645000  |
| C  | 2.796568000  | -1.758601000 | 2.799281000  |
| C  | 1.832583000  | -2.733257000 | 0.811396000  |
| C  | 3.753552000  | -2.772649000 | 2.826699000  |
| C  | 2.783861000  | -3.751073000 | 0.844751000  |
| C  | 3.747747000  | -3.772071000 | 1.852927000  |
| H  | 2.820491000  | -0.975187000 | 3.562199000  |
| H  | 1.099547000  | -2.680135000 | 0.001364000  |
| H  | 4.513397000  | -2.778825000 | 3.612115000  |
| H  | 2.786676000  | -4.516715000 | 0.064275000  |
| H  | 4.503496000  | -4.560998000 | 1.874268000  |
| C  | 1.347265000  | 1.003390000  | 2.441815000  |
| C  | 1.366780000  | 1.171809000  | 3.832735000  |
| C  | 2.000265000  | 1.942103000  | 1.631916000  |
| C  | 2.045418000  | 2.247555000  | 4.402555000  |
| C  | 2.682954000  | 3.014673000  | 2.203535000  |

<sup>3</sup>Int\_12, -4425.51212, NImag=0

|    |              |              |              |
|----|--------------|--------------|--------------|
| Co | -0.142815000 | 0.411916000  | -0.448996000 |
| P  | 2.013314000  | 0.179596000  | -1.048738000 |
| C  | 3.197089000  | -0.487529000 | 0.187568000  |
| C  | 3.184177000  | 0.085644000  | 1.470900000  |
| C  | 4.018379000  | -1.603141000 | -0.015378000 |
| C  | 3.984214000  | -0.405999000 | 2.500741000  |
| C  | 4.814161000  | -2.112507000 | 1.010229000  |
| C  | 4.803785000  | -1.506962000 | 2.264891000  |
| H  | 4.022528000  | -2.095127000 | -0.991355000 |
| H  | 3.948369000  | 0.069839000  | 3.483432000  |
| H  | 5.438917000  | -2.989162000 | 0.826627000  |
| H  | 5.428412000  | -1.897741000 | 3.071641000  |
| P  | -0.152196000 | -0.532023000 | 1.623763000  |
| C  | 0.496857000  | 0.472736000  | 3.024599000  |
| C  | 1.654343000  | 1.255801000  | 2.841310000  |
| C  | -0.208262000 | 0.641556000  | 4.225476000  |
| C  | 2.077613000  | 2.170919000  | 3.801108000  |
| C  | 0.217960000  | 1.543210000  | 5.199313000  |
| C  | 1.357600000  | 2.315612000  | 4.985236000  |
| O  | 2.362463000  | 1.171778000  | 1.660750000  |
| H  | -1.121181000 | 0.064334000  | 4.393421000  |
| H  | 2.971959000  | 2.763252000  | 3.597401000  |
| H  | -0.353092000 | 1.650115000  | 6.123972000  |
| H  | 1.688580000  | 3.034306000  | 5.738176000  |
| O  | -1.940118000 | 0.639338000  | -1.186045000 |
| C  | 2.795409000  | 1.770403000  | -1.528914000 |
| C  | 4.106545000  | 2.133268000  | -1.195947000 |
| C  | 2.002562000  | 2.670260000  | -2.253767000 |
| C  | 4.615752000  | 3.370013000  | -1.591501000 |
| C  | 2.513523000  | 3.903180000  | -2.649933000 |
| C  | 3.822134000  | 4.256162000  | -2.319452000 |
| H  | 4.735214000  | 1.446693000  | -0.620774000 |
| H  | 0.966662000  | 2.411322000  | -2.493948000 |
| H  | 5.639642000  | 3.644121000  | -1.325254000 |
| H  | 1.877485000  | 4.596305000  | -3.205789000 |
| H  | 4.222254000  | 5.226707000  | -2.622677000 |
| C  | 2.330833000  | -0.872230000 | -2.520652000 |
| C  | 3.537454000  | -0.824732000 | -3.233732000 |
| C  | 1.315301000  | -1.735980000 | -2.952606000 |
| C  | 3.734625000  | -1.644070000 | -4.342483000 |
| C  | 1.518465000  | -2.560694000 | -4.059997000 |
| C  | 2.726710000  | -2.518347000 | -4.753534000 |
| H  | 4.329198000  | -0.138174000 | -2.917060000 |
| H  | 0.350277000  | -1.747169000 | -2.431305000 |
| H  | 4.678096000  | -1.598539000 | -4.891879000 |
| H  | 0.721338000  | -3.232072000 | -4.388844000 |
| H  | 2.881649000  | -3.160003000 | -5.624370000 |
| C  | -1.826325000 | -1.008012000 | 2.212078000  |
| C  | -2.081629000 | -2.153105000 | 2.979404000  |
| C  | -2.900370000 | -0.199550000 | 1.811926000  |
| C  | -3.386952000 | -2.479206000 | 3.344420000  |
| C  | -4.204549000 | -0.531409000 | 2.175672000  |
| C  | -4.451034000 | -1.671349000 | 2.940964000  |
| H  | -1.256642000 | -2.803116000 | 3.286028000  |
| H  | -2.704871000 | 0.682785000  | 1.197553000  |
| H  | -3.575113000 | -3.376016000 | 3.939981000  |
| H  | -5.033753000 | 0.097377000  | 1.840913000  |
| H  | -5.474444000 | -1.936287000 | 3.218178000  |
| C  | 0.737533000  | -2.132338000 | 1.709032000  |
| C  | 1.438035000  | -2.601006000 | 2.825372000  |
| C  | 0.679827000  | -2.926331000 | 0.553818000  |
| C  | 2.062555000  | -3.848447000 | 2.788904000  |
| C  | 1.296501000  | -4.174393000 | 0.522642000  |

|   |              |              |              |
|---|--------------|--------------|--------------|
| C | 2.708887000  | 3.167369000  | 3.589496000  |
| H | 0.842583000  | 0.456190000  | 4.475160000  |
| H | 1.964978000  | 1.816688000  | 0.542685000  |
| H | 2.055088000  | 2.370191000  | 5.488561000  |
| H | 3.186849000  | 3.741981000  | 1.561418000  |
| H | 3.239686000  | 4.010642000  | 4.037984000  |
| C | 4.211203000  | -0.579274000 | -2.762918000 |
| C | 3.936759000  | 0.262964000  | -1.465535000 |
| C | 4.162677000  | 0.272025000  | -4.025095000 |
| O | 3.093336000  | -1.474344000 | -2.809929000 |
| C | 5.491202000  | -1.388159000 | -2.720497000 |
| O | 2.500765000  | 0.258009000  | -1.418188000 |
| C | 4.426481000  | 1.696429000  | -1.526337000 |
| C | 4.455709000  | -0.412543000 | -0.205725000 |
| H | 3.971261000  | 2.254581000  | -2.353904000 |
| H | 5.519570000  | 1.737193000  | -1.645317000 |
| H | 4.177538000  | 2.221181000  | -0.592457000 |
| H | 4.129753000  | -1.460327000 | -0.149205000 |
| H | 4.062463000  | 0.107821000  | 0.680134000  |
| H | 5.553573000  | -0.389991000 | -0.149636000 |
| H | 6.368822000  | -0.738074000 | -2.587509000 |
| H | 5.621260000  | -1.938547000 | -3.662151000 |
| H | 5.477394000  | -2.123732000 | -1.906907000 |
| H | 3.251087000  | 0.886492000  | -4.055412000 |
| H | 4.143909000  | -0.386818000 | -4.903331000 |
| H | 5.033001000  | 0.937777000  | -4.116090000 |
| B | 2.029866000  | -0.872467000 | -2.149104000 |
| H | -2.941732000 | -1.019599000 | 0.185452000  |
| B | -2.606001000 | -1.981854000 | -0.431884000 |
| O | -3.399360000 | -2.578000000 | -1.360397000 |
| O | -1.403920000 | -2.613328000 | -0.243098000 |
| C | -2.590604000 | -3.591539000 | -2.014503000 |
| C | -1.513582000 | -3.903237000 | -0.931673000 |
| C | -3.477831000 | -4.761139000 | -2.376413000 |
| H | -2.882543000 | -5.592240000 | -2.782046000 |
| H | -4.045805000 | -5.129707000 | -1.513397000 |
| H | -4.200524000 | -4.461556000 | -3.147137000 |
| C | -1.983328000 | -2.947963000 | -3.249379000 |
| H | -1.452992000 | -3.684568000 | -3.868407000 |
| H | -2.780226000 | -2.505065000 | -3.862496000 |
| H | -1.260733000 | -2.166588000 | -2.972732000 |
| C | -1.989599000 | -4.890494000 | 0.121116000  |
| H | -1.282527000 | -4.888470000 | 0.962763000  |
| H | -2.041538000 | -5.913560000 | -0.277473000 |
| H | -2.980480000 | -4.621590000 | 0.514154000  |
| C | -0.181340000 | -4.327836000 | -1.507947000 |
| H | -0.332551000 | -5.150265000 | -2.223339000 |
| H | 0.480690000  | -4.710331000 | -0.719679000 |
| H | 0.322698000  | -3.497868000 | -2.021137000 |

\*One extra very low imaginary frequency below  $i3\text{cm}^{-1}$  is present

<sup>3</sup>TS\_13, -4425.50761, NImag=1

|    |              |              |              |
|----|--------------|--------------|--------------|
| Co | -0.112393000 | 0.394204000  | -0.307332000 |
| P  | 1.971986000  | 0.804334000  | -0.969489000 |
| C  | 3.350914000  | 0.044829000  | -0.026556000 |
| C  | 3.328578000  | 0.190934000  | 1.371627000  |
| C  | 4.337380000  | -0.781608000 | -0.577746000 |
| C  | 4.272519000  | -0.431266000 | 2.186761000  |
| C  | 5.281366000  | -1.417594000 | 0.228052000  |
| C  | 5.253482000  | -1.233717000 | 1.608732000  |
| H  | 4.356775000  | -0.945743000 | -1.658175000 |
| H  | 4.224750000  | -0.292547000 | 3.269211000  |
| H  | 6.036096000  | -2.062551000 | -0.226877000 |
| H  | 5.992570000  | -1.725223000 | 2.245864000  |
| P  | 0.146466000  | -1.049138000 | 1.415389000  |
| C  | 0.738980000  | -0.404721000 | 3.035327000  |
| C  | 1.732111000  | 0.594256000  | 3.065650000  |
| C  | 0.126902000  | -0.739810000 | 4.252391000  |
| C  | 2.083415000  | 1.239956000  | 4.247736000  |
| C  | 0.485080000  | -0.110787000 | 5.443492000  |
| C  | 1.457805000  | 0.886932000  | 5.441466000  |
| O  | 2.341471000  | 0.991300000  | 1.894598000  |
| H  | -0.658977000 | -1.499491000 | 4.263344000  |
| H  | 2.846476000  | 2.019911000  | 4.208989000  |
| H  | -0.009961000 | -0.394343000 | 6.374602000  |
| H  | 1.731328000  | 1.394519000  | 6.369080000  |
| O  | -2.014014000 | 0.716200000  | -0.754003000 |
| C  | 2.385691000  | 2.592519000  | -0.937125000 |
| C  | 3.647815000  | 3.095178000  | -0.596766000 |
| C  | 1.355508000  | 3.489137000  | -1.252206000 |
| C  | 3.876093000  | 4.471001000  | -0.583536000 |
| C  | 1.586927000  | 4.862148000  | -1.241838000 |
| C  | 2.847825000  | 5.356152000  | -0.906686000 |
| H  | 4.457935000  | 2.407845000  | -0.333518000 |

|   |              |              |              |
|---|--------------|--------------|--------------|
| C | 1.990022000  | -4.637954000 | 1.641734000  |
| H | 1.501267000  | -1.984448000 | 3.728221000  |
| H | 0.137171000  | -2.550269000 | -0.320728000 |
| H | 2.614071000  | -4.203562000 | 3.663312000  |
| H | 1.245656000  | -4.782189000 | -0.385186000 |
| H | 2.482162000  | -5.613277000 | 1.617398000  |
| C | -3.981637000 | -2.075853000 | -2.242326000 |
| C | -2.736868000 | -2.810632000 | -1.624789000 |
| C | -3.904540000 | -1.987854000 | -3.760807000 |
| O | -3.853352000 | -0.745497000 | -1.728088000 |
| C | -5.319460000 | -2.643604000 | -1.813378000 |
| O | -1.791859000 | -1.737398000 | -1.499909000 |
| C | -2.134503000 | -3.890427000 | -2.501492000 |
| C | -3.017661000 | -3.355984000 | -0.233462000 |
| H | -1.803916000 | -3.493612000 | -3.469730000 |
| H | -2.853979000 | -4.701491000 | -2.689019000 |
| H | -1.258287000 | -4.333532000 | -2.004305000 |
| H | -3.475848000 | -2.589233000 | 0.405877000  |
| H | -2.076217000 | -3.667634000 | 0.242142000  |
| H | -3.688140000 | -4.227202000 | -0.259354000 |
| H | -5.417359000 | -3.700177000 | -2.104451000 |
| H | -6.136045000 | -2.087227000 | -2.293515000 |
| H | -5.461365000 | -2.567527000 | -0.727953000 |
| H | -2.929391000 | -1.598058000 | -4.086725000 |
| H | -4.675672000 | -1.294937000 | -4.123077000 |
| H | -4.065756000 | -2.961763000 | -4.245178000 |
| B | -2.507487000 | -0.517652000 | -1.451144000 |
| H | 0.259444000  | 2.127659000  | 0.183674000  |
| B | -0.783032000 | 2.722432000  | -0.070233000 |
| O | -0.913357000 | 3.495108000  | -1.176505000 |
| O | -1.777094000 | 2.845038000  | 0.844385000  |
| C | -2.229745000 | 4.102797000  | -1.149419000 |
| C | -2.795899000 | 3.715152000  | 0.289087000  |
| C | -2.037024000 | 5.593350000  | -1.362580000 |
| H | -2.996506000 | 6.128878000  | -1.341543000 |
| H | -1.375711000 | 6.040401000  | -0.610584000 |
| H | -1.581261000 | 5.765145000  | -2.346885000 |
| C | -3.018483000 | 3.509783000  | -2.303758000 |
| H | -4.033799000 | 3.927380000  | -2.352187000 |
| H | -2.512178000 | 3.753045000  | -3.247834000 |
| H | -3.076132000 | 2.417810000  | -2.224255000 |
| C | -2.927290000 | 4.889580000  | 1.242992000  |
| H | -3.230189000 | 4.522363000  | 2.232533000  |
| H | -3.685814000 | 5.607786000  | 0.902414000  |
| H | -1.977493000 | 5.424302000  | 1.368097000  |
| C | -4.091199000 | 2.924933000  | 0.247547000  |
| H | -4.907521000 | 3.518207000  | -0.188125000 |
| H | -4.386338000 | 2.654823000  | 1.271392000  |
| H | -3.977153000 | 2.000145000  | -0.333166000 |

<sup>3</sup>Int\_13, -4425.51638, NImag=0

|    |              |              |              |
|----|--------------|--------------|--------------|
| Co | -0.038723000 | 0.365188000  | 0.052362000  |
| P  | -1.989378000 | 1.218052000  | 0.694924000  |
| C  | -3.396693000 | 0.051599000  | 0.797757000  |
| C  | -3.736394000 | -0.638323000 | -0.378734000 |
| C  | -4.037499000 | -0.324679000 | 1.983832000  |
| C  | -4.689870000 | -1.653581000 | -0.383385000 |
| C  | -4.988515000 | -1.345337000 | 1.994773000  |
| C  | -5.315163000 | -2.004916000 | 0.811795000  |
| H  | -3.776313000 | 0.179473000  | 2.918103000  |
| H  | -4.927420000 | -2.169295000 | -1.316803000 |
| H  | -5.471181000 | -1.626955000 | 2.932844000  |
| H  | -6.059562000 | -2.804668000 | 0.814926000  |
| P  | -0.475201000 | -1.642326000 | -0.862226000 |
| C  | -1.578705000 | -1.930809000 | -2.310367000 |
| C  | -2.747261000 | -1.161667000 | -2.472502000 |
| C  | -1.244186000 | -2.815747000 | -3.346537000 |
| C  | -3.538699000 | -1.266004000 | -3.613808000 |
| C  | -2.037766000 | -2.936577000 | -4.485737000 |
| C  | -3.184873000 | -2.157537000 | -4.623585000 |
| O  | -3.092740000 | -0.230829000 | -1.520085000 |
| H  | -0.333856000 | -3.414864000 | -3.265367000 |
| H  | -4.423549000 | -0.631284000 | -3.693203000 |
| H  | -1.749346000 | -3.635539000 | -5.273556000 |
| H  | -3.804176000 | -2.237833000 | -5.519633000 |
| O  | 1.901499000  | 0.799512000  | 0.342898000  |
| C  | -2.634882000 | 2.633824000  | -0.269829000 |
| C  | -3.996802000 | 2.827536000  | -0.531255000 |
| C  | -1.699214000 | 3.554405000  | -0.765341000 |
| C  | -4.420505000 | 3.931465000  | -1.270265000 |
| C  | -2.130471000 | 4.660893000  | -1.494339000 |
| C  | -3.488688000 | 4.851150000  | -1.750475000 |
| H  | -4.732833000 | 2.108466000  | -0.157947000 |

|                                          |              |              |              |                                           |              |              |              |
|------------------------------------------|--------------|--------------|--------------|-------------------------------------------|--------------|--------------|--------------|
| H                                        | 0.355340000  | 3.114319000  | -1.492452000 | H                                         | -0.626804000 | 3.407080000  | -0.589895000 |
| H                                        | 4.863500000  | 4.853825000  | -0.313553000 | H                                         | -5.485199000 | 4.072851000  | -1.472310000 |
| H                                        | 0.768580000  | 5.545666000  | -1.480463000 | H                                         | -1.394557000 | 5.374757000  | -1.872886000 |
| H                                        | 3.028044000  | 6.433761000  | -0.888625000 | H                                         | -3.821924000 | 5.715297000  | -2.330397000 |
| C                                        | 2.352788000  | 0.333200000  | -2.703808000 | C                                         | -1.894138000 | 1.883184000  | 2.402566000  |
| C                                        | 3.474880000  | 0.812574000  | -3.394557000 | C                                         | -2.850651000 | 2.756223000  | 2.938655000  |
| C                                        | 1.461992000  | -0.524903000 | -3.362753000 | C                                         | -0.803530000 | 1.498118000  | 3.193363000  |
| C                                        | 3.715571000  | 0.419382000  | -4.708872000 | C                                         | -2.726870000 | 3.218500000  | 4.246719000  |
| C                                        | 1.707650000  | -0.922091000 | -4.677557000 | C                                         | -0.682217000 | 1.958010000  | 4.504146000  |
| C                                        | 2.835202000  | -0.454140000 | -5.350147000 | C                                         | -1.644758000 | 2.816564000  | 5.032305000  |
| H                                        | 4.164879000  | 1.502038000  | -2.897540000 | H                                         | -3.697177000 | 3.077439000  | 2.323303000  |
| H                                        | 0.555711000  | -0.865211000 | -2.847003000 | H                                         | -0.030664000 | 0.844217000  | 2.770898000  |
| H                                        | 4.592704000  | 0.799272000  | -5.238337000 | H                                         | -3.476202000 | 3.900528000  | 4.655742000  |
| H                                        | 1.007590000  | -1.592012000 | -5.182910000 | H                                         | 0.174454000  | 1.652408000  | 5.109168000  |
| C                                        | 3.024555000  | -0.760623000 | -6.381750000 | H                                         | -1.547828000 | 3.183553000  | 6.056912000  |
| C                                        | -1.378814000 | -1.961683000 | 1.887070000  | C                                         | 1.056854000  | -2.533647000 | -1.344746000 |
| C                                        | -1.391003000 | -3.329695000 | 2.194017000  | C                                         | 1.242122000  | -3.912753000 | -1.166799000 |
| C                                        | -2.590701000 | -1.252271000 | 1.877910000  | C                                         | 2.104289000  | -1.764417000 | -1.871779000 |
| C                                        | -2.590420000 | -3.976548000 | 2.488809000  | C                                         | 2.448641000  | -4.511587000 | -1.525442000 |
| C                                        | -3.787205000 | -1.905170000 | 2.172173000  | C                                         | 3.313611000  | -2.365669000 | -2.218915000 |
| C                                        | -3.791606000 | -3.267098000 | 2.474893000  | C                                         | 3.487327000  | -3.739007000 | -2.049888000 |
| H                                        | -0.457593000 | -3.900109000 | 2.194284000  | H                                         | 0.438921000  | -4.522270000 | -0.740742000 |
| H                                        | -2.600822000 | -0.183123000 | 1.641480000  | H                                         | 1.992771000  | -0.684826000 | -2.013678000 |
| H                                        | -2.586486000 | -5.043846000 | 2.723925000  | H                                         | 2.583214000  | -5.586993000 | -1.384436000 |
| H                                        | -4.724238000 | -1.342880000 | 2.151258000  | H                                         | 4.123091000  | -1.741583000 | -2.606199000 |
| H                                        | -4.731810000 | -3.778017000 | 2.697252000  | H                                         | 4.436564000  | -4.210363000 | -2.317719000 |
| C                                        | 1.283545000  | -2.418513000 | 0.978318000  | C                                         | -1.157420000 | -2.716933000 | 0.457902000  |
| C                                        | 2.146734000  | -3.063909000 | 1.869354000  | C                                         | -2.108038000 | -3.724450000 | 0.263832000  |
| C                                        | 1.257115000  | -2.824991000 | -0.364379000 | C                                         | -0.676258000 | -2.472109000 | 1.754114000  |
| C                                        | 2.965055000  | -4.103203000 | 1.424358000  | C                                         | -2.569541000 | -4.473995000 | 1.346563000  |
| C                                        | 2.065246000  | -3.869586000 | -0.804474000 | C                                         | -1.129145000 | -3.228773000 | 2.831355000  |
| C                                        | 2.923012000  | -4.510458000 | 0.091389000  | C                                         | -2.080884000 | -4.230017000 | 2.629115000  |
| H                                        | 2.184844000  | -2.747686000 | 2.917078000  | H                                         | -2.498379000 | -3.919272000 | -0.740399000 |
| H                                        | 0.590172000  | -2.304697000 | -1.062058000 | H                                         | 0.075719000  | -1.688027000 | 1.914514000  |
| H                                        | 3.644101000  | -4.595723000 | 2.125105000  | H                                         | -3.319051000 | -5.253114000 | 1.185762000  |
| H                                        | 2.035407000  | -4.174936000 | -1.854129000 | H                                         | -0.743486000 | -3.029790000 | 3.834421000  |
| H                                        | 3.566922000  | -5.323623000 | -0.252219000 | H                                         | -2.445665000 | -4.817916000 | 3.474711000  |
| C                                        | -3.842041000 | -1.775920000 | -2.517114000 | C                                         | 4.835163000  | -0.793189000 | 1.603837000  |
| C                                        | -2.448624000 | -2.466847000 | -2.282390000 | C                                         | 3.660209000  | -1.559941000 | 2.311387000  |
| C                                        | -3.961688000 | -1.172514000 | -3.909212000 | C                                         | 5.462506000  | 0.266564000  | 2.496174000  |
| O                                        | -3.819673000 | -0.685893000 | -1.580592000 | O                                         | 4.157566000  | -0.098794000 | 0.535297000  |
| C                                        | -5.036318000 | -2.656778000 | -2.215090000 | C                                         | 5.899300000  | -1.688145000 | 1.005569000  |
| O                                        | -1.637215000 | -1.359968000 | -1.850505000 | O                                         | 2.534540000  | -0.697718000 | 2.048792000  |
| C                                        | -1.822345000 | -3.072187000 | -3.522234000 | C                                         | 3.819345000  | -1.718818000 | 3.808042000  |
| C                                        | -2.487962000 | -3.486794000 | -1.156796000 | C                                         | 3.361051000  | -2.896813000 | 1.655545000  |
| H                                        | -1.654685000 | -2.321402000 | -4.304837000 | H                                         | 3.879969000  | -0.750637000 | 4.319574000  |
| H                                        | -2.453944000 | -3.870604000 | -3.939222000 | H                                         | 4.723968000  | -2.296042000 | 4.049343000  |
| H                                        | -0.848262000 | -3.518514000 | -3.271127000 | H                                         | 2.958347000  | -2.261519000 | 4.222420000  |
| H                                        | -2.960129000 | -3.068067000 | -0.257851000 | H                                         | 3.262581000  | -2.783820000 | 0.567601000  |
| H                                        | -1.463772000 | -3.783744000 | -0.888360000 | H                                         | 2.408993000  | -3.292085000 | 2.037387000  |
| H                                        | -3.038579000 | -4.394332000 | -1.443103000 | H                                         | 4.143802000  | -3.642510000 | 1.854790000  |
| H                                        | -5.036521000 | -3.557415000 | -2.846783000 | H                                         | 6.379257000  | -2.302548000 | 1.781556000  |
| H                                        | -5.967674000 | -2.109189000 | -2.413116000 | H                                         | 6.679934000  | -1.079305000 | 0.529979000  |
| H                                        | -5.053139000 | -2.969350000 | -1.163601000 | H                                         | 5.485515000  | -2.355996000 | 0.239932000  |
| H                                        | -3.092732000 | -0.542306000 | -4.146486000 | H                                         | 4.697407000  | 0.918301000  | 2.941819000  |
| H                                        | -4.855043000 | -0.535489000 | -3.953683000 | H                                         | 6.129554000  | 0.900320000  | 1.896515000  |
| H                                        | -4.052211000 | -1.941635000 | -4.689460000 | H                                         | 6.054246000  | -0.175945000 | 3.309771000  |
| B                                        | -2.493781000 | -0.364452000 | -1.342143000 | B                                         | 2.848391000  | 0.040785000  | 0.920870000  |
| H                                        | -0.407525000 | 1.953119000  | 0.615723000  | H                                         | 0.510947000  | 1.387747000  | -1.278698000 |
| B                                        | -1.607081000 | 2.215301000  | 0.430909000  | B                                         | 1.716297000  | 1.694063000  | -0.878915000 |
| O                                        | -1.903960000 | 3.325760000  | -0.330039000 | O                                         | 1.735789000  | 3.089034000  | -0.561140000 |
| O                                        | -2.486438000 | 2.025905000  | 1.476471000  | O                                         | 2.701659000  | 1.437425000  | -1.879381000 |
| C                                        | -3.288911000 | 3.638401000  | -0.093352000 | C                                         | 2.924907000  | 3.632222000  | -1.131559000 |
| C                                        | -3.592566000 | 2.928011000  | 1.295865000  | C                                         | 3.147355000  | 2.698981000  | -2.370153000 |
| C                                        | -3.424577000 | 5.150049000  | -0.059372000 | C                                         | 2.684603000  | 5.089447000  | -1.474053000 |
| H                                        | -4.456012000 | 5.453374000  | 0.172540000  | H                                         | 3.536004000  | 5.517541000  | -2.024895000 |
| H                                        | -2.754537000 | 5.609476000  | 0.677000000  | H                                         | 1.779675000  | 5.217882000  | -2.081770000 |
| H                                        | -3.169031000 | 5.565161000  | -1.043906000 | H                                         | 2.551729000  | 5.678166000  | -0.555421000 |
| C                                        | -4.105731000 | 3.087164000  | -1.254802000 | C                                         | 4.054602000  | 3.508817000  | -0.113644000 |
| H                                        | -5.169746000 | 3.347290000  | -1.160144000 | H                                         | 4.979581000  | 3.997978000  | -0.454542000 |
| H                                        | -3.734700000 | 3.528403000  | -2.190151000 | H                                         | 3.744824000  | 3.987769000  | 0.825997000  |
| H                                        | -4.017322000 | 1.999112000  | -1.344960000 | H                                         | 4.281407000  | 2.455138000  | 0.100851000  |
| C                                        | -3.571505000 | 3.879366000  | 2.481815000  | C                                         | 2.266185000  | 3.100147000  | -3.548097000 |
| H                                        | -3.651343000 | 3.299946000  | 3.411505000  | H                                         | 2.280124000  | 2.300214000  | -4.301186000 |
| H                                        | -4.403699000 | 4.596955000  | 2.455546000  | H                                         | 2.607531000  | 4.027681000  | -4.031324000 |
| H                                        | -2.629469000 | 4.441399000  | 2.525382000  | H                                         | 1.222876000  | 3.239946000  | -3.228663000 |
| C                                        | -4.870434000 | 2.107973000  | 1.300089000  | C                                         | 4.593293000  | 2.566702000  | -2.805760000 |
| H                                        | -5.754171000 | 2.733930000  | 1.106767000  | H                                         | 5.025455000  | 3.544408000  | -3.068397000 |
| H                                        | -5.004970000 | 1.637037000  | 2.284539000  | H                                         | 4.666180000  | 1.920935000  | -3.692462000 |
| H                                        | -4.836793000 | 1.309800000  | 0.546566000  | H                                         | 5.204409000  | 2.112218000  | -2.015487000 |
| <sup>3</sup> TS_14, -4425.49462, NImag=1 |              |              |              | <sup>3</sup> Int_14, -4750.91519, NImag=0 |              |              |              |
| Co                                       | 0.104997000  | 0.385489000  | -0.078543000 | Co                                        | -0.431328000 | -0.016036000 | -0.437667000 |
| P                                        | -1.680897000 | 1.310124000  | 0.867575000  | P                                         | -1.139250000 | 1.954946000  | 0.397570000  |
| C                                        | -3.140555000 | 0.201116000  | 0.905146000  | C                                         | -2.948179000 | 1.994288000  | 0.726339000  |



|   |              |              |              |   |              |              |              |
|---|--------------|--------------|--------------|---|--------------|--------------|--------------|
| C | -3.571400000 | -0.308932000 | -0.332697000 | C | -3.762101000 | 1.683712000  | -0.377896000 |
| C | -3.699304000 | -0.345681000 | 2.065983000  | C | -3.566775000 | 2.161636000  | 1.969318000  |
| C | -4.498189000 | -1.344209000 | -0.416921000 | C | -5.132205000 | 1.472405000  | -0.243791000 |
| C | -4.632638000 | -1.380766000 | 1.995873000  | C | -4.942300000 | 1.974304000  | 2.113976000  |
| C | -5.022394000 | -1.885032000 | 0.756963000  | C | -5.717834000 | 1.611214000  | 1.013753000  |
| H | -3.376857000 | 0.025298000  | 3.042986000  | H | -2.960768000 | 2.420936000  | 2.842123000  |
| H | -4.791651000 | -1.728616000 | -1.396988000 | H | -5.725913000 | 1.199640000  | -1.119809000 |
| H | -5.044794000 | -1.803651000 | 2.914755000  | H | -5.407031000 | 2.099501000  | 3.094702000  |
| H | -5.739748000 | -2.707028000 | 0.697535000  | H | -6.790627000 | 1.439349000  | 1.129296000  |
| P | -0.573049000 | -1.467561000 | -1.083781000 | P | -2.225456000 | -1.191989000 | -0.954263000 |
| C | -1.661618000 | -1.349260000 | -2.569302000 | C | -3.155244000 | -0.606099000 | -2.444931000 |
| C | -2.756061000 | -0.463622000 | -2.561971000 | C | -3.489992000 | 0.753744000  | -2.564688000 |
| C | -1.387671000 | -2.021941000 | -3.768755000 | C | -3.491675000 | -1.446188000 | -3.515418000 |
| C | -3.537238000 | -0.259397000 | -3.696906000 | C | -4.115312000 | 1.257692000  | -3.702836000 |
| C | -2.169672000 | -1.831467000 | -4.907129000 | C | -4.128491000 | -0.955296000 | -4.654776000 |
| C | -3.244721000 | -0.945381000 | -4.873369000 | C | -4.436451000 | 0.400223000  | -4.752463000 |
| O | -3.036195000 | 0.287164000  | -1.445723000 | O | -3.122159000 | 1.644291000  | -1.586657000 |
| H | -0.531825000 | -2.700871000 | -3.816338000 | H | -3.238388000 | -2.508679000 | -3.461733000 |
| H | -4.364095000 | 0.450907000  | -3.637092000 | H | -4.331644000 | 2.326957000  | -3.747040000 |
| H | -1.929289000 | -2.370927000 | -5.825848000 | H | -4.375952000 | -1.636129000 | -5.472244000 |
| H | -3.856172000 | -0.782987000 | -5.763810000 | H | -4.925519000 | 0.793703000  | -5.646414000 |
| O | 2.113535000  | 0.860996000  | 0.674244000  | H | 1.601358000  | -1.950892000 | -1.113807000 |
| C | -2.328915000 | 2.876564000  | 0.170953000  | C | 2.320112000  | 0.810000000  | 0.640235000  |
| C | -3.692412000 | 3.193034000  | 0.135868000  | C | 3.035019000  | 1.052574000  | 1.817675000  |
| C | -1.398282000 | 3.785656000  | -0.349952000 | C | 2.214763000  | 1.827805000  | -0.317445000 |
| C | -4.120339000 | 4.407523000  | -0.399306000 | C | 3.607866000  | 2.306416000  | 2.036883000  |
| C | -1.828971000 | 5.005090000  | -0.869565000 | C | 2.784801000  | 3.075590000  | -0.089256000 |
| C | -3.188696000 | 5.317563000  | -0.897937000 | C | 3.486141000  | 3.322246000  | 1.091716000  |
| H | -4.426452000 | 2.481061000  | 0.527050000  | H | 3.132733000  | 0.267933000  | 2.566727000  |
| H | -0.335516000 | 3.517061000  | -0.356596000 | H | 1.648985000  | 1.623517000  | -1.231441000 |
| H | -5.187158000 | 4.643706000  | -0.427327000 | H | 4.152878000  | 2.486223000  | 2.967247000  |
| H | -1.099018000 | 5.714535000  | -1.267736000 | H | 2.668279000  | 3.862245000  | -0.840125000 |
| H | -3.523894000 | 6.269868000  | -1.316470000 | H | 3.930702000  | 4.303409000  | 1.276119000  |
| C | -1.477481000 | 1.716136000  | 2.651285000  | N | 1.707991000  | -0.460570000 | 0.345672000  |
| C | -2.269612000 | 2.645798000  | 3.337651000  | C | 2.265917000  | -1.120216000 | -0.839930000 |
| C | -0.470236000 | 1.036134000  | 3.350046000  | O | 3.535285000  | -1.647412000 | -0.530749000 |
| C | -2.069152000 | 2.876265000  | 4.697671000  | C | 1.298140000  | -2.449020000 | 3.383052000  |
| C | -0.274926000 | 1.261788000  | 4.711949000  | C | 0.625748000  | -3.347971000 | 2.295337000  |
| C | -1.074932000 | 2.181826000  | 5.388493000  | C | 0.530301000  | -2.336278000 | 4.680713000  |
| H | -3.050396000 | 3.195073000  | 2.802621000  | O | 1.309535000  | -1.152382000 | 2.732297000  |
| H | 0.172290000  | 0.328737000  | 2.813217000  | C | 2.749033000  | -2.826794000 | 3.635465000  |
| H | -2.692435000 | 3.604477000  | 5.222655000  | O | 1.070483000  | -2.714379000 | 1.071131000  |
| H | 0.513092000  | 0.723494000  | 5.245042000  | C | -0.886178000 | -3.246193000 | 2.335938000  |
| H | -0.919184000 | 2.365427000  | 6.454405000  | C | 1.078862000  | -4.790095000 | 2.281861000  |
| C | 0.924372000  | -2.313012000 | -1.749876000 | H | -1.203274000 | -2.193906000 | 2.354621000  |
| C | 1.079155000  | -3.699908000 | -1.877886000 | H | -1.313506000 | -3.751294000 | 3.213408000  |
| C | 2.010219000  | -1.479298000 | -2.058561000 | H | -1.312501000 | -3.704279000 | 1.434616000  |
| C | 2.294594000  | -4.236988000 | -2.303404000 | H | 2.156034000  | -4.877730000 | 2.096885000  |
| C | 3.227647000  | -2.016707000 | -2.471254000 | H | 0.558992000  | -5.335908000 | 1.482902000  |
| C | 3.372519000  | -3.399434000 | -2.595560000 | H | 0.845075000  | -5.284152000 | 3.236300000  |
| H | 0.252524000  | -4.370824000 | -1.625605000 | H | 2.834862000  | -3.779912000 | 4.175527000  |
| H | 1.891530000  | -0.394723000 | -1.959077000 | H | 3.231284000  | -2.049812000 | 4.243963000  |
| H | 2.404102000  | -5.320653000 | -2.396110000 | H | 3.309174000  | -2.912626000 | 2.692667000  |
| H | 4.063294000  | -1.343876000 | -2.682320000 | H | -0.461839000 | -1.892454000 | 4.529835000  |
| H | 4.325923000  | -3.827060000 | -2.916393000 | H | 1.077486000  | -1.703080000 | 5.392246000  |
| C | -1.380478000 | -2.810374000 | -0.110944000 | H | 0.400115000  | -3.324479000 | 5.145266000  |
| C | -2.129638000 | -3.853807000 | -0.671934000 | B | 1.354129000  | -1.411888000 | 1.387845000  |
| C | -1.232688000 | -2.754903000 | 1.281128000  | H | 2.311252000  | -0.406774000 | -1.674893000 |
| C | -2.698140000 | -4.832459000 | 0.141379000  | C | -0.958275000 | 3.488925000  | -0.609407000 |
| C | -1.795803000 | -3.737241000 | 2.094729000  | C | -1.424535000 | 4.730808000  | -0.156699000 |
| C | -2.528528000 | -4.778317000 | 1.525742000  | C | -0.417896000 | 3.390721000  | -1.895467000 |
| H | -2.276212000 | -3.896138000 | -1.756530000 | C | -1.306980000 | 5.864210000  | -0.959095000 |
| H | -0.674278000 | -1.917496000 | 1.718373000  | C | -0.303611000 | 4.524461000  | -2.699183000 |
| H | -3.281094000 | -5.641134000 | -0.306965000 | C | -0.737814000 | 5.763784000  | -2.229619000 |
| H | -1.677428000 | -3.678303000 | 3.180061000  | H | -1.888882000 | 4.811540000  | 0.831565000  |
| H | -2.978802000 | -5.543884000 | 2.162472000  | H | -0.125591000 | 2.398068000  | -2.261605000 |
| C | 4.226396000  | -1.591682000 | 2.185598000  | H | -1.669014000 | 6.828899000  | -0.594683000 |
| C | 2.797767000  | -2.246335000 | 2.252415000  | H | 0.117129000  | 4.436679000  | -3.704243000 |
| C | 4.635293000  | -0.940581000 | 3.496494000  | H | -0.648493000 | 6.652228000  | -2.860021000 |
| O | 4.041625000  | -0.519826000 | 1.225425000  | C | -0.427713000 | 2.393410000  | 2.035916000  |
| C | 5.314478000  | -2.511949000 | 1.678234000  | C | 0.284534000  | 3.566633000  | 2.315800000  |
| O | 1.937168000  | -1.130135000 | 1.912913000  | C | -0.512482000 | 1.414080000  | 3.039892000  |
| C | 2.396209000  | -2.763005000 | 3.616672000  | C | 0.863687000  | 3.765911000  | 3.569320000  |
| C | 2.591962000  | -3.311702000 | 1.192301000  | C | 0.054648000  | 1.616779000  | 4.293614000  |
| H | 2.385279000  | -1.968646000 | 4.372876000  | C | 0.743476000  | 2.799452000  | 4.564888000  |
| H | 3.081221000  | -3.553946000 | 3.954803000  | H | 0.407862000  | 4.330109000  | 1.544410000  |
| H | 1.386888000  | -3.194880000 | 3.568709000  | H | -1.019517000 | 0.465096000  | 2.826073000  |
| H | 2.898715000  | -2.953380000 | 0.200422000  | H | 1.423502000  | 4.684974000  | 3.762031000  |
| H | 1.526425000  | -3.576500000 | 1.137191000  | H | -0.026920000 | 0.839071000  | 5.056627000  |
| H | 3.159066000  | -4.225672000 | 1.417780000  | H | 1.197424000  | 2.959328000  | 5.545952000  |
| H | 5.418835000  | -3.391739000 | 2.329610000  | C | -1.647043000 | -2.845824000 | -1.517166000 |
| H | 6.278517000  | -1.986518000 | 1.667507000  | C | -2.101924000 | -4.061166000 | -0.989434000 |
| H | 5.111260000  | -2.857127000 | 0.657348000  | C | -0.601389000 | -2.870649000 | -2.457204000 |
| H | 3.848634000  | -0.273821000 | 3.877256000  | C | -1.515229000 | -5.268106000 | -1.374500000 |

|   |             |              |              |
|---|-------------|--------------|--------------|
| H | 5.537177000 | -0.334957000 | 3.338299000  |
| H | 4.857605000 | -1.686367000 | 4.272060000  |
| B | 2.712147000 | -0.228707000 | 1.227478000  |
| H | 0.510324000 | 1.334416000  | -1.352230000 |
| B | 2.470846000 | 1.763672000  | -0.328602000 |
| O | 2.228961000 | 3.104515000  | -0.202989000 |
| O | 3.356363000 | 1.439477000  | -1.322580000 |
| C | 3.053250000 | 3.773663000  | -1.181341000 |
| C | 3.466661000 | 2.611019000  | -2.164177000 |
| C | 2.238581000 | 4.871900000  | -1.831031000 |
| H | 2.809742000 | 5.367262000  | -2.630055000 |
| H | 1.307783000 | 4.481699000  | -2.260435000 |
| H | 1.973136000 | 5.634702000  | -1.085841000 |
| C | 4.235442000 | 4.358091000  | -0.424129000 |
| H | 4.898883000 | 4.940929000  | -1.078390000 |
| H | 3.865616000 | 5.024290000  | 0.366531000  |
| H | 4.830844000 | 3.569721000  | 0.056665000  |
| C | 2.498959000 | 2.429755000  | -3.322271000 |
| H | 2.760198000 | 1.512697000  | -3.869225000 |
| H | 2.546057000 | 3.269251000  | -4.030007000 |
| H | 1.467292000 | 2.311651000  | -2.960329000 |
| C | 4.889607000 | 2.704127000  | -2.674382000 |
| H | 5.039169000 | 3.630077000  | -3.248824000 |
| H | 5.103832000 | 1.860166000  | -3.343969000 |
| H | 5.624174000 | 2.678240000  | -1.860760000 |

|   |              |              |              |
|---|--------------|--------------|--------------|
| C | -0.023124000 | -4.076103000 | -2.843923000 |
| C | -0.472110000 | -5.280156000 | -2.297952000 |
| H | -2.920509000 | -4.071109000 | -0.264709000 |
| H | -0.240406000 | -1.921468000 | -2.869025000 |
| H | -1.880705000 | -6.205990000 | -0.947851000 |
| H | 0.789380000  | -4.075804000 | -3.574947000 |
| H | -0.012695000 | -6.225322000 | -2.596932000 |
| C | -3.649593000 | -1.606641000 | 0.151879000  |
| C | -4.814356000 | -2.244833000 | -0.299499000 |
| C | -3.575122000 | -1.215076000 | 1.490891000  |
| C | -5.864355000 | -2.504275000 | 0.578375000  |
| C | -4.623226000 | -1.472007000 | 2.373277000  |
| C | -5.769040000 | -2.121381000 | 1.918248000  |
| H | -4.901016000 | -2.539947000 | -1.350177000 |
| H | -2.682715000 | -0.674006000 | 1.823550000  |
| H | -6.765397000 | -3.005364000 | 0.215546000  |
| H | -4.550471000 | -1.146672000 | 3.414372000  |
| H | -6.596081000 | -2.320590000 | 2.604261000  |
| C | 6.035266000  | 0.469229000  | -1.942233000 |
| C | 6.859634000  | -0.747660000 | -1.393134000 |
| C | 6.058238000  | 1.664433000  | -1.004267000 |
| O | 4.685865000  | -0.051407000 | -1.933725000 |
| C | 6.391422000  | 0.887447000  | -3.351826000 |
| O | 5.904313000  | -1.405472000 | -0.532432000 |
| C | 8.074069000  | -0.366197000 | -0.575182000 |
| C | 7.237613000  | -1.738074000 | -2.483580000 |
| H | 7.800096000  | 0.218625000  | 0.310766000  |
| H | 8.782719000  | 0.223067000  | -1.175382000 |
| H | 8.596704000  | -1.268350000 | -0.230222000 |
| H | 6.368585000  | -2.005693000 | -3.100644000 |
| H | 7.615996000  | -2.659803000 | -2.022297000 |
| H | 8.019966000  | -1.342383000 | -3.146092000 |
| H | 7.443786000  | 1.201206000  | -3.413075000 |
| H | 5.770288000  | 1.738260000  | -3.661706000 |
| H | 6.229071000  | 0.077719000  | -4.073112000 |
| H | 5.793926000  | 1.375725000  | 0.023567000  |
| H | 5.315557000  | 2.401798000  | -1.336151000 |
| H | 7.042202000  | 2.153595000  | -0.985725000 |
| B | 4.663676000  | -1.044158000 | -0.986024000 |
| H | -0.077527000 | 0.251111000  | -2.006756000 |

<sup>3</sup>Ts\_15, -4750.87042, NImag=1

|    |              |              |              |
|----|--------------|--------------|--------------|
| Co | -0.566439000 | 0.012475000  | -0.430830000 |
| P  | -1.642344000 | 1.880820000  | 0.237550000  |
| C  | -3.355640000 | 1.526116000  | 0.810243000  |
| C  | -4.190681000 | 0.897119000  | -0.129694000 |
| C  | -3.840013000 | 1.680928000  | 2.113467000  |
| C  | -5.433626000 | 0.377208000  | 0.224064000  |
| C  | -5.091479000 | 1.181577000  | 2.477221000  |
| C  | -5.877552000 | 0.515878000  | 1.538383000  |
| H  | -3.219399000 | 2.179311000  | 2.863414000  |
| H  | -6.040475000 | -0.133383000 | -0.527738000 |
| H  | -5.446484000 | 1.301974000  | 3.503245000  |
| H  | -6.847677000 | 0.103271000  | 1.825201000  |
| P  | -2.096481000 | -1.579793000 | -0.611174000 |
| C  | -3.338178000 | -1.454632000 | -1.975345000 |
| C  | -3.981115000 | -0.227303000 | -2.213723000 |
| C  | -3.623453000 | -2.509960000 | -2.853685000 |
| C  | -4.845921000 | -0.049550000 | -3.291222000 |
| C  | -4.498251000 | -2.347888000 | -3.927071000 |
| C  | -5.103768000 | -1.112914000 | -4.152816000 |
| O  | -3.716442000 | 0.857088000  | -1.414894000 |
| H  | -3.138134000 | -3.477977000 | -2.701832000 |
| H  | -5.301416000 | 0.931907000  | -3.436292000 |
| H  | -4.699138000 | -3.189445000 | -4.593624000 |
| H  | -5.780690000 | -0.975512000 | -4.999025000 |
| H  | 1.162340000  | -1.340975000 | -1.661289000 |
| C  | 1.945793000  | 1.458826000  | 0.050687000  |
| C  | 2.410112000  | 1.916402000  | 1.292457000  |
| C  | 1.743173000  | 2.391389000  | -0.978149000 |
| C  | 2.709134000  | 3.263918000  | 1.474000000  |
| C  | 2.037642000  | 3.738104000  | -0.782526000 |
| C  | 2.535326000  | 4.184697000  | 0.441265000  |
| H  | 2.545804000  | 1.209823000  | 2.109403000  |
| H  | 1.326676000  | 2.061590000  | -1.931460000 |
| H  | 3.075183000  | 3.597159000  | 2.448672000  |
| H  | 1.861784000  | 4.444289000  | -1.598488000 |
| H  | 2.764026000  | 5.241885000  | 0.595239000  |
| N  | 1.599105000  | 0.084783000  | -0.138689000 |
| C  | 1.739986000  | -0.446327000 | -1.428746000 |
| O  | 3.178896000  | -1.337148000 | -0.945594000 |
| C  | 3.299958000  | -2.015471000 | 2.409220000  |
| C  | 1.864900000  | -2.587450000 | 2.158060000  |
| C  | 3.566805000  | -1.578684000 | 3.834421000  |
| O  | 3.297801000  | -0.847935000 | 1.564766000  |

<sup>3</sup>Int\_15, -4750.99121, NImag=0

|    |              |              |              |
|----|--------------|--------------|--------------|
| Co | 0.403510000  | -0.053677000 | -0.228158000 |
| P  | 1.608634000  | 1.876439000  | 0.013365000  |
| C  | 3.411962000  | 1.625373000  | 0.274385000  |
| C  | 3.760697000  | 0.730601000  | 1.300807000  |
| C  | 4.448861000  | 2.192950000  | -0.474188000 |
| C  | 5.075280000  | 0.316836000  | 1.499437000  |
| C  | 5.773342000  | 1.805639000  | -0.273384000 |
| C  | 6.079548000  | 0.847331000  | 0.692074000  |
| H  | 4.217354000  | 2.942743000  | -1.234527000 |
| H  | 5.303646000  | -0.411754000 | 2.281112000  |
| H  | 6.567044000  | 2.249114000  | -0.878257000 |
| H  | 7.112374000  | 0.521628000  | 0.836112000  |
| P  | 1.814153000  | -1.829264000 | 0.259419000  |
| C  | 2.287126000  | -2.022815000 | 2.034747000  |
| C  | 2.724441000  | -0.889544000 | 2.741854000  |
| C  | 2.196479000  | -3.230071000 | 2.741570000  |
| C  | 3.058769000  | -0.948846000 | 4.092211000  |
| C  | 2.533686000  | -3.302489000 | 4.092704000  |
| C  | 2.964710000  | -2.162842000 | 4.769766000  |
| O  | 2.729584000  | 0.334831000  | 2.113769000  |
| H  | 1.849912000  | -4.128394000 | 2.223492000  |
| H  | 3.381278000  | -0.034309000 | 4.594264000  |
| H  | 2.453743000  | -4.255939000 | 4.619000000  |
| H  | 3.223925000  | -2.214917000 | 5.829401000  |
| H  | -1.164757000 | -0.878020000 | 1.561426000  |
| C  | -2.199961000 | 1.898813000  | 0.016921000  |
| C  | -2.696308000 | 2.389104000  | -1.212502000 |
| C  | -2.118944000 | 2.823354000  | 1.081244000  |
| C  | -3.062490000 | 3.721470000  | -1.359618000 |
| C  | -2.465100000 | 4.163333000  | 0.913071000  |
| C  | -2.938974000 | 4.633848000  | -0.309160000 |
| H  | -2.818851000 | 1.698067000  | -2.042383000 |
| H  | -1.782891000 | 2.506731000  | 2.067647000  |
| H  | -3.451387000 | 4.053430000  | -2.327152000 |
| H  | -2.371100000 | 4.842204000  | 1.765715000  |
| H  | -3.221695000 | 5.681302000  | -0.435951000 |
| N  | -1.778524000 | 0.566939000  | 0.172272000  |
| C  | -1.482281000 | 0.175314000  | 1.543411000  |
| O  | -2.994807000 | -1.622533000 | 0.170135000  |
| C  | -2.473969000 | -1.198303000 | -2.941871000 |
| C  | -0.960613000 | -1.286230000 | -2.584752000 |
| C  | -2.756424000 | -0.533013000 | -4.276065000 |
| O  | -2.977327000 | -0.371477000 | -1.904491000 |

|   |              |              |              |   |              |              |              |
|---|--------------|--------------|--------------|---|--------------|--------------|--------------|
| C | 4.389489000  | -2.956110000 | 1.918099000  | C | -3.140146000 | -2.570217000 | -2.879645000 |
| O | 1.651459000  | -2.267855000 | 0.778122000  | O | -1.006740000 | -1.354246000 | -1.153321000 |
| C | 0.803377000  | -1.851644000 | 2.965821000  | C | -0.209554000 | -0.014178000 | -2.959819000 |
| C | 1.747049000  | -4.083363000 | 2.358725000  | C | -0.238670000 | -2.502499000 | -3.127178000 |
| H | 0.926122000  | -0.761969000 | 2.865441000  | H | -0.730341000 | 0.890842000  | -2.607393000 |
| H | 0.827486000  | -2.106224000 | 4.035858000  | H | -0.035919000 | 0.089366000  | -4.041468000 |
| H | -0.188781000 | -2.118826000 | 2.572150000  | H | 0.797744000  | -0.047842000 | -2.498420000 |
| H | 2.364502000  | -4.635131000 | 1.639182000  | H | -0.630621000 | -3.431691000 | -2.693490000 |
| H | 0.706279000  | -4.406727000 | 2.220764000  | H | 0.835685000  | -2.454998000 | -2.889620000 |
| H | 2.053186000  | -4.368565000 | 3.376549000  | H | -0.330438000 | -2.559145000 | -4.222587000 |
| H | 4.495379000  | -3.835688000 | 2.569378000  | H | -2.857973000 | -3.206127000 | -3.732038000 |
| H | 5.349863000  | -2.424113000 | 1.896871000  | H | -4.231330000 | -2.441735000 | -2.898246000 |
| H | 4.184693000  | -3.298464000 | 0.894424000  | H | -2.883595000 | -3.093224000 | -1.948408000 |
| H | 2.884513000  | -0.779235000 | 4.151838000  | H | -2.396695000 | 0.504452000  | -4.297977000 |
| H | 4.592276000  | -1.195730000 | 3.928678000  | H | -3.839157000 | -0.509598000 | -4.461327000 |
| H | 3.460713000  | -2.422121000 | 4.532785000  | H | -2.287495000 | -1.081356000 | -5.107138000 |
| B | 2.412303000  | -1.115661000 | 0.521246000  | B | -2.274879000 | -0.685033000 | -0.690041000 |
| C | 2.033136000  | 0.187155000  | -2.268664000 | H | -2.350466000 | 0.260768000  | 2.223121000  |
| C | -1.952831000 | 3.276869000  | -0.919520000 | C | 1.342375000  | 3.216500000  | 1.261641000  |
| C | -2.763112000 | 4.363008000  | -0.559838000 | C | 1.607963000  | 4.561224000  | 0.966992000  |
| C | -1.423327000 | 3.219536000  | -2.211986000 | C | 0.956150000  | 2.882494000  | 2.566363000  |
| C | -3.004240000 | 5.394023000  | -1.465653000 | C | 1.448487000  | 5.547358000  | 1.938129000  |
| C | -1.666237000 | 4.250962000  | -3.118617000 | C | 0.806115000  | 3.867531000  | 3.540564000  |
| C | -2.449263000 | 5.342605000  | -2.745377000 | C | 1.041142000  | 5.205072000  | 3.226924000  |
| H | -3.214833000 | 4.399356000  | 0.436915000  | H | 1.941914000  | 4.847320000  | -0.033817000 |
| H | -0.850134000 | 2.330401000  | -2.498550000 | H | 0.779260000  | 1.837456000  | 2.829605000  |
| H | -3.634821000 | 6.237868000  | -1.174559000 | H | 1.649838000  | 6.591021000  | 1.685062000  |
| H | -1.251258000 | 4.195232000  | -4.128295000 | H | 0.499214000  | 3.586230000  | 4.550851000  |
| H | -2.641302000 | 6.149589000  | -3.457037000 | H | 0.914223000  | 5.979161000  | 3.987342000  |
| C | -0.917853000 | 2.672143000  | 1.730850000  | C | 1.443174000  | 2.736825000  | -1.591933000 |
| C | -0.618909000 | 4.030762000  | 1.875990000  | C | 0.370277000  | 3.625163000  | -1.771752000 |
| C | -0.582939000 | 1.800690000  | 2.780636000  | C | 2.188849000  | 2.356437000  | -2.720349000 |
| C | -0.031158000 | 4.505207000  | 3.050348000  | C | 0.074845000  | 4.137867000  | -3.032726000 |
| C | -0.004315000 | 2.271638000  | 3.954267000  | C | 1.894466000  | 2.875182000  | -3.979599000 |
| C | 0.270404000  | 3.633528000  | 4.093953000  | C | 0.837428000  | 3.770523000  | -4.140743000 |
| H | -0.828802000 | 4.729345000  | 1.062417000  | H | -0.254562000 | 3.913576000  | -0.920496000 |
| H | -0.776007000 | 0.728149000  | 2.661061000  | H | 3.007407000  | 1.637684000  | -2.621062000 |
| H | 0.200906000  | 5.569405000  | 3.143073000  | H | -0.768339000 | 4.824177000  | -3.142509000 |
| H | 0.243369000  | 1.571793000  | 4.757263000  | H | 2.492785000  | 2.570526000  | -4.841821000 |
| H | 0.730270000  | 4.010736000  | 5.010648000  | H | 0.604687000  | 4.174384000  | -5.128724000 |
| C | -1.173388000 | -3.093068000 | -1.079616000 | C | 1.064241000  | -3.464879000 | -0.096987000 |
| C | -1.003440000 | -4.176665000 | -0.210126000 | C | 1.688945000  | -4.460286000 | -0.858305000 |
| C | -0.472758000 | -3.089025000 | -2.298783000 | C | -0.247061000 | -3.681497000 | 0.354717000  |
| C | -0.153748000 | -5.229580000 | -0.548936000 | C | 1.019309000  | -5.648781000 | -1.153563000 |
| C | 0.376791000  | -4.139700000 | -2.632157000 | C | -0.911394000 | -4.868677000 | 0.065259000  |
| C | 0.542706000  | -5.213049000 | -1.754904000 | C | -0.279631000 | -5.856234000 | -0.692797000 |
| H | -1.533300000 | -4.197325000 | 0.747011000  | H | 2.701471000  | -4.307864000 | -1.240952000 |
| H | -0.594622000 | -2.239796000 | -2.980548000 | H | -0.775298000 | -2.906517000 | 0.915647000  |
| H | -0.029493000 | -6.066815000 | 0.142857000  | H | 1.518076000  | -6.414399000 | -1.752803000 |
| H | 0.915846000  | -4.120229000 | -3.582609000 | H | -1.937275000 | -5.005160000 | 0.415302000  |
| H | 1.213126000  | -6.035637000 | -2.014279000 | H | -0.804436000 | -6.784478000 | -0.931283000 |
| C | -3.153439000 | -2.166549000 | 0.781100000  | C | 3.465848000  | -1.934236000 | -0.541405000 |
| C | -4.167865000 | -3.121803000 | 0.625432000  | C | 4.489176000  | -2.768419000 | -0.069918000 |
| C | -2.930480000 | -1.617728000 | 2.046792000  | C | 3.710462000  | -1.127093000 | -1.656353000 |
| C | -4.931257000 | -3.523290000 | 1.718818000  | C | 5.726239000  | -2.795504000 | -0.709663000 |
| C | -3.692616000 | -2.017862000 | 3.143873000  | C | 4.948032000  | -1.150566000 | -2.296853000 |
| C | -4.693814000 | -2.972863000 | 2.980749000  | C | 5.958396000  | -1.985799000 | -1.822875000 |
| H | -4.362081000 | -3.554440000 | -0.361095000 | H | 4.316696000  | -3.400577000 | 0.806970000  |
| H | -2.156682000 | -0.850119000 | 2.152836000  | H | 2.915446000  | -0.458357000 | -2.005290000 |
| H | -5.718498000 | -4.269917000 | 1.587551000  | H | 6.517053000  | -3.449955000 | -0.334957000 |
| H | -3.511309000 | -1.570488000 | 4.124520000  | H | 5.126707000  | -0.504741000 | -3.160426000 |
| H | -5.297180000 | -3.286493000 | 3.836174000  | H | 6.932148000  | -2.002707000 | -2.318132000 |
| C | 5.779303000  | 1.002745000  | -1.588700000 | C | -5.995403000 | 0.064429000  | 1.011821000  |
| C | 6.593092000  | -0.299922000 | -1.275228000 | C | -6.220561000 | -1.345851000 | 1.660877000  |
| C | 5.625960000  | 1.898840000  | -0.370863000 | C | -6.655186000 | 0.194729000  | -0.353869000 |
| O | 4.462012000  | 0.468212000  | -1.876901000 | O | -4.579795000 | 0.063582000  | 0.793095000  |
| C | 6.264769000  | 1.786810000  | -2.786020000 | C | -6.355025000 | 1.242721000  | 1.891587000  |
| O | 5.577007000  | -1.168287000 | -0.716154000 | O | -5.179103000 | -2.135573000 | 1.054743000  |
| C | 7.694081000  | -0.121621000 | -0.253125000 | C | -7.561606000 | -1.974789000 | 1.348770000  |
| C | 7.123847000  | -0.976977000 | -2.527913000 | C | -5.969989000 | -1.338995000 | 3.161518000  |
| H | 7.299415000  | 0.208930000  | 0.714914000  | H | -7.695125000 | -2.130911000 | 0.271600000  |
| H | 8.433658000  | 0.615882000  | -0.597671000 | H | -8.386490000 | -1.344291000 | 1.712702000  |
| H | 8.219646000  | -1.072494000 | -0.092362000 | H | -7.646873000 | -2.954243000 | 1.838933000  |
| H | 6.337809000  | -1.090707000 | -3.287314000 | H | -5.010493000 | -0.859165000 | 3.402022000  |
| H | 7.491520000  | -1.979812000 | -2.273724000 | H | -5.928297000 | -2.373138000 | 3.529158000  |
| H | 7.954192000  | -0.413412000 | -2.975780000 | H | -6.763373000 | -0.812761000 | 3.711250000  |
| H | 7.298141000  | 2.131375000  | -2.635068000 | H | -7.423683000 | 1.235215000  | 2.153360000  |
| H | 5.634484000  | 2.674151000  | -2.933172000 | H | -6.143214000 | 2.181386000  | 1.360511000  |
| H | 6.228374000  | 1.194576000  | -3.708281000 | H | -5.769589000 | 1.252249000  | 2.819492000  |
| H | 5.290598000  | 1.324854000  | 0.506058000  | H | -6.410187000 | -0.663534000 | -0.995858000 |
| H | 4.863534000  | 2.664335000  | -0.572123000 | H | -6.270286000 | 1.095371000  | -0.851495000 |
| H | 6.566156000  | 2.407647000  | -0.115694000 | H | -7.749495000 | 0.276138000  | -0.284130000 |
| B | 4.377325000  | -0.705544000 | -1.173898000 | B | -4.192787000 | -1.258262000 | 0.645743000  |
| H | -0.426180000 | 0.240341000  | -2.061346000 | H | -0.666169000 | 0.779986000  | 1.972735000  |

<sup>3</sup>TS\_16, -4750.97533, NImag=1

|    |              |              |              |
|----|--------------|--------------|--------------|
| Co | -0.367388000 | -0.022535000 | 0.044663000  |
| P  | -1.877862000 | 1.687726000  | -0.043212000 |
| C  | -3.456921000 | 1.252196000  | -0.879523000 |
| C  | -3.354037000 | 0.458271000  | -2.034158000 |
| C  | -4.735453000 | 1.661668000  | -0.482162000 |
| C  | -4.482514000 | 0.059648000  | -2.749055000 |
| C  | -5.872325000 | 1.262442000  | -1.183016000 |
| C  | -5.743766000 | 0.459044000  | -2.314754000 |
| H  | -4.843673000 | 2.305524000  | 0.394587000  |
| H  | -4.366569000 | -0.562185000 | -3.639662000 |
| H  | -6.859368000 | 1.587197000  | -0.847373000 |
| H  | -6.629682000 | 0.146455000  | -2.872491000 |
| P  | -1.613803000 | -1.891174000 | -0.261778000 |
| C  | -1.705036000 | -2.217951000 | -2.078787000 |
| C  | -1.871532000 | -1.137339000 | -2.963622000 |
| C  | -1.462773000 | -3.480161000 | -2.639903000 |
| C  | -1.770457000 | -1.295992000 | -4.342898000 |
| C  | -1.377754000 | -3.653459000 | -4.020541000 |
| C  | -1.520267000 | -2.560085000 | -4.873224000 |
| O  | -2.083061000 | 0.127419000  | -2.455344000 |
| H  | -1.323079000 | -4.340722000 | -1.980440000 |
| H  | -1.888586000 | -0.418134000 | -4.981329000 |
| H  | -1.186410000 | -4.647620000 | -4.429621000 |
| H  | -1.437295000 | -2.688568000 | -5.954631000 |
| H  | 1.316516000  | -1.116142000 | -1.723272000 |
| C  | 1.961629000  | 1.887376000  | -0.455153000 |
| C  | 1.584457000  | 2.736034000  | 0.611310000  |
| C  | 2.807186000  | 2.455975000  | -1.437089000 |
| C  | 1.995772000  | 4.058097000  | 0.684457000  |
| C  | 3.220562000  | 3.784094000  | -1.355879000 |
| C  | 2.818117000  | 4.606733000  | -0.304992000 |
| H  | 0.932524000  | 2.328362000  | 1.387043000  |
| H  | 3.150295000  | 1.850187000  | -2.278267000 |
| H  | 1.666912000  | 4.674244000  | 1.528079000  |
| H  | 3.871127000  | 4.184404000  | -2.140310000 |
| H  | 3.138539000  | 5.649330000  | -0.253168000 |
| N  | 1.475146000  | 0.594090000  | -0.508008000 |
| C  | 1.757381000  | -0.105660000 | -1.742217000 |
| O  | 3.158631000  | -1.436772000 | 0.379413000  |
| C  | 2.256759000  | -0.078496000 | 3.429457000  |
| C  | 0.914605000  | -0.804603000 | 3.036786000  |
| C  | 2.068579000  | 1.214126000  | 4.197762000  |
| O  | 2.858397000  | 0.210919000  | 2.160313000  |
| C  | 3.217002000  | -0.998103000 | 4.173452000  |
| O  | 1.201969000  | -1.317238000 | 1.724632000  |
| C  | -0.254290000 | 0.151740000  | 2.908069000  |
| C  | 0.530783000  | -1.974555000 | 3.922312000  |
| H  | 0.008085000  | 1.002949000  | 2.266126000  |
| H  | -0.602662000 | 0.557392000  | 3.868674000  |
| H  | -1.105771000 | -0.369940000 | 2.441974000  |
| H  | 1.296917000  | -2.759220000 | 3.919503000  |
| H  | -0.400464000 | -2.430128000 | 3.554479000  |
| H  | 0.362411000  | -1.651380000 | 4.960421000  |
| H  | 2.861733000  | -1.246624000 | 5.183599000  |
| H  | 4.191746000  | -0.500784000 | 4.266200000  |
| H  | 3.376305000  | -1.936903000 | 3.623886000  |
| H  | 1.495113000  | 1.954546000  | 3.626233000  |
| H  | 3.046644000  | 1.660862000  | 4.420428000  |
| H  | 1.552937000  | 1.035168000  | 5.153154000  |
| B  | 2.378481000  | -0.717234000 | 1.257854000  |
| H  | 2.838572000  | -0.249134000 | -1.940826000 |
| C  | -1.451013000 | 3.189048000  | -1.016817000 |
| C  | -2.081361000 | 4.425363000  | -0.819861000 |
| C  | -0.492404000 | 3.066199000  | -2.027718000 |
| C  | -1.728983000 | 5.525376000  | -1.598473000 |
| C  | -0.145361000 | 4.165291000  | -2.810336000 |
| C  | -0.756420000 | 5.398216000  | -2.591253000 |
| H  | -2.848263000 | 4.533446000  | -0.046759000 |
| H  | -0.008761000 | 2.100149000  | -2.187929000 |
| H  | -2.217636000 | 6.488121000  | -1.429519000 |
| H  | 0.622610000  | 4.057738000  | -3.579812000 |
| H  | -0.474803000 | 6.264533000  | -3.194661000 |
| C  | -2.362916000 | 2.341339000  | 1.592990000  |
| C  | -1.628803000 | 3.389730000  | 2.172709000  |
| C  | -3.290190000 | 1.654053000  | 2.392331000  |
| C  | -1.829441000 | 3.745824000  | 3.505109000  |
| C  | -3.495155000 | 2.017577000  | 3.721485000  |
| C  | -2.764004000 | 3.063969000  | 4.284913000  |
| H  | -0.886718000 | 3.927513000  | 1.574945000  |
| H  | -3.853993000 | 0.816598000  | 1.971517000  |
| H  | -1.248832000 | 4.565132000  | 3.936414000  |
| H  | -4.229661000 | 1.474752000  | 4.322517000  |
| H  | -2.921646000 | 3.346807000  | 5.328285000  |

<sup>3</sup>E, -3853.84209, NImag=0

|    |              |              |              |
|----|--------------|--------------|--------------|
| Co | -0.013814000 | -0.901428000 | -0.752310000 |
| P  | -2.025913000 | -0.253166000 | -0.058849000 |
| C  | -2.164851000 | 1.572864000  | -0.095637000 |
| C  | -1.385217000 | 2.298651000  | 0.823283000  |
| C  | -2.737089000 | 2.282234000  | -1.159945000 |
| C  | -1.187140000 | 3.670789000  | 0.698352000  |
| C  | -2.547167000 | 3.657263000  | -1.296759000 |
| C  | -1.770045000 | 4.349585000  | -0.370494000 |
| H  | -3.314546000 | 1.744317000  | -1.916341000 |
| H  | -0.562215000 | 4.192639000  | 1.427380000  |
| H  | -2.994623000 | 4.184537000  | -2.142008000 |
| H  | -1.606844000 | 5.424114000  | -0.480688000 |
| P  | 1.421936000  | 0.682675000  | -0.008308000 |
| C  | 1.564265000  | 1.535088000  | 1.624847000  |
| C  | 0.405182000  | 1.874910000  | 2.349554000  |
| C  | 2.801609000  | 1.792974000  | 2.235262000  |
| C  | 0.477422000  | 2.429084000  | 3.626099000  |
| C  | 2.883379000  | 2.360042000  | 3.505605000  |
| C  | 1.719601000  | 2.673852000  | 4.205989000  |
| O  | -0.838013000 | 1.575052000  | 1.849794000  |
| H  | 3.721966000  | 1.534433000  | 1.704611000  |
| H  | -0.454660000 | 2.652675000  | 4.148786000  |
| H  | 3.862119000  | 2.549354000  | 3.951432000  |
| H  | 1.776275000  | 3.107568000  | 5.206785000  |
| H  | 1.161460000  | -1.213131000 | -3.672912000 |
| C  | -2.476546000 | -0.800002000 | 1.644352000  |
| C  | -3.779545000 | -0.785201000 | 2.153377000  |
| C  | -1.439753000 | -1.284943000 | 2.453250000  |
| C  | -4.037404000 | -1.237960000 | 3.447214000  |
| C  | -1.696104000 | -1.739273000 | 3.743531000  |
| C  | -2.998211000 | -1.716096000 | 4.244118000  |
| H  | -4.608182000 | -0.425014000 | 1.539107000  |
| H  | -0.416362000 | -1.288512000 | 2.060338000  |
| H  | -5.059722000 | -1.220387000 | 3.832570000  |
| H  | -0.875101000 | -2.113987000 | 4.359642000  |
| H  | -3.203967000 | -2.074578000 | 5.255533000  |
| C  | -3.445866000 | -0.834342000 | -1.067700000 |
| C  | -4.727956000 | -0.263277000 | -1.047966000 |
| C  | -3.215779000 | -1.948708000 | -1.886652000 |
| C  | -5.754771000 | -0.802332000 | -1.820101000 |
| C  | -4.246232000 | -2.493143000 | -2.652213000 |
| C  | -5.516711000 | -1.921110000 | -2.619897000 |
| H  | -4.923638000 | 0.621138000  | -0.434166000 |
| H  | -2.209307000 | -2.384855000 | -1.923934000 |
| H  | -6.747443000 | -0.346042000 | -1.798266000 |
| H  | -4.051629000 | -3.364550000 | -3.281535000 |
| H  | -6.323743000 | -2.342893000 | -3.223707000 |
| C  | 3.135652000  | 0.087026000  | -0.271542000 |
| C  | 4.0229917000 | 0.669879000  | -1.179800000 |
| C  | 3.526998000  | -1.071325000 | 0.418181000  |
| C  | 5.293132000  | 0.113219000  | -1.380602000 |
| C  | 5.679447000  | -1.026576000 | -0.676905000 |
| H  | 3.740498000  | 1.562877000  | -1.740115000 |
| H  | 2.828727000  | -1.563417000 | 1.104554000  |
| H  | 5.979497000  | 0.576146000  | -2.093869000 |
| H  | 5.074531000  | -2.523096000 | 0.765184000  |
| H  | 6.668851000  | -1.461259000 | -0.837477000 |
| C  | 1.277319000  | 2.092262000  | -1.174741000 |
| C  | 1.839620000  | 3.354564000  | -0.942561000 |
| C  | 0.577796000  | 1.870237000  | -2.367754000 |
| C  | 1.710912000  | 4.367491000  | -1.890269000 |
| C  | 0.451760000  | 2.881762000  | -3.318352000 |
| C  | 1.019419000  | 4.132406000  | -3.079823000 |
| H  | 2.382629000  | 3.544663000  | -0.011288000 |
| H  | 0.120312000  | 0.888871000  | -2.552563000 |
| H  | 2.154008000  | 5.348170000  | -1.700192000 |
| H  | -0.098582000 | 2.693997000  | -4.243189000 |
| H  | 0.919773000  | 4.928734000  | -3.821249000 |
| N  | 0.889224000  | -2.211403000 | -1.857324000 |
| C  | 1.643281000  | -1.986536000 | -3.055878000 |
| H  | 2.684167000  | -1.646118000 | -2.864595000 |
| C  | 1.349407000  | -3.169218000 | -0.997829000 |
| C  | 2.540429000  | -3.922244000 | -1.158058000 |
| C  | 0.603820000  | -3.401189000 | 0.193461000  |
| C  | 2.968117000  | -4.796319000 | -0.162546000 |
| C  | 1.056425000  | -4.254562000 | 1.189058000  |
| C  | 2.252968000  | -4.962332000 | 1.026179000  |
| H  | 3.146670000  | -3.792931000 | -2.057125000 |
| H  | -0.382299000 | -2.920036000 | 0.288543000  |
| H  | 3.896547000  | -5.355874000 | -0.314964000 |
| H  | 0.452724000  | -4.394541000 | 2.091030000  |
| H  | 2.604315000  | -5.649614000 | 1.798363000  |

|   |              |              |              |
|---|--------------|--------------|--------------|
| C | -0.863991000 | -3.450081000 | 0.355040000  |
| C | -1.575929000 | -4.443350000 | 1.039514000  |
| C | 0.513956000  | -3.619884000 | 0.154456000  |
| C | -0.918202000 | -5.577168000 | 1.520001000  |
| C | 1.165938000  | -4.754522000 | 0.624164000  |
| C | 0.451322000  | -5.734928000 | 1.314878000  |
| H | -2.651971000 | -4.338800000 | 1.201601000  |
| H | 1.095101000  | -2.845868000 | -0.353648000 |
| H | -1.484637000 | -6.342881000 | 2.055693000  |
| H | 2.241736000  | -4.857700000 | 0.463707000  |
| H | 0.963582000  | -6.621876000 | 1.695660000  |
| C | -3.355465000 | -2.055660000 | 0.300262000  |
| C | -4.412700000 | -2.417110000 | -0.542800000 |
| C | -3.633487000 | -1.791704000 | 1.650034000  |
| C | -5.717005000 | -2.489976000 | -0.053382000 |
| C | -4.932403000 | -1.881858000 | 2.143184000  |
| C | -5.981652000 | -2.222530000 | 1.288213000  |
| H | -4.218345000 | -2.638941000 | -1.595907000 |
| H | -2.818623000 | -1.515080000 | 2.327631000  |
| H | -6.532392000 | -2.758906000 | -0.729623000 |
| H | -5.126911000 | -1.677125000 | 3.199231000  |
| H | -7.003726000 | -2.281282000 | 1.669247000  |
| C | 6.212744000  | 0.117619000  | -0.604399000 |
| C | 6.183602000  | -1.191673000 | -1.469497000 |
| C | 7.097769000  | -0.012984000 | 0.626281000  |
| O | 4.854457000  | 0.203732000  | -0.137830000 |
| C | 6.552128000  | 1.378327000  | -1.370338000 |
| O | 5.145086000  | -1.963090000 | -0.829549000 |
| C | 7.470086000  | -1.989103000 | -1.452810000 |
| C | 5.736385000  | -0.934492000 | -2.900193000 |
| H | 7.731585000  | -2.321102000 | -0.441009000 |
| H | 8.305938000  | -1.394351000 | -1.849575000 |
| H | 7.369231000  | -2.884828000 | -2.080462000 |
| H | 4.815960000  | -0.333340000 | -2.929572000 |
| H | 5.525645000  | -1.892145000 | -3.394758000 |
| H | 6.505344000  | -0.409183000 | -3.483753000 |
| H | 7.560716000  | 1.315604000  | -1.805363000 |
| H | 6.525056000  | 2.244920000  | -0.696333000 |
| H | 5.834792000  | 1.573188000  | -2.176485000 |
| H | 6.873622000  | -0.933301000 | 1.184114000  |
| H | 6.908990000  | 0.835862000  | 1.296403000  |
| H | 8.166563000  | -0.017976000 | 0.369697000  |
| B | 4.339787000  | -1.065897000 | -0.167046000 |
| H | 1.354393000  | 0.406944000  | -2.642500000 |

|   |             |              |              |
|---|-------------|--------------|--------------|
| H | 1.725375000 | -2.891458000 | -3.688749000 |
|---|-------------|--------------|--------------|

<sup>†</sup>TS\_17, -4265.37429, NImag=1

|    |              |              |              |
|----|--------------|--------------|--------------|
| Co | -0.234222000 | 0.425237000  | -0.330910000 |
| P  | -1.237645000 | -1.332074000 | 0.724135000  |
| C  | -0.160128000 | -2.708268000 | 1.275309000  |
| C  | 0.809489000  | -3.115978000 | 0.340201000  |
| C  | -0.151124000 | -3.310550000 | 2.536861000  |
| C  | 1.812758000  | -4.021146000 | 0.676040000  |
| C  | 0.834569000  | -4.236568000 | 2.879689000  |
| C  | 1.824962000  | -4.571441000 | 1.957288000  |
| H  | -0.917996000 | -3.039756000 | 3.267876000  |
| H  | 2.574960000  | -4.289000000 | -0.059297000 |
| H  | 0.832634000  | -4.691146000 | 3.872674000  |
| H  | 2.612102000  | -5.278674000 | 2.228653000  |
| P  | 2.002764000  | 0.019574000  | -0.401697000 |
| C  | 2.512859000  | -1.232163000 | -1.663574000 |
| C  | 1.752891000  | -2.413082000 | -1.749167000 |
| C  | 3.593809000  | -1.100899000 | -2.546538000 |
| C  | 2.020560000  | -3.393184000 | -2.701366000 |
| C  | 3.878935000  | -2.081975000 | -3.495482000 |
| C  | 3.085585000  | -3.224341000 | -3.582924000 |
| O  | 0.672244000  | -2.579537000 | -0.914849000 |
| H  | 4.233162000  | -0.217073000 | -2.488813000 |
| H  | 1.382756000  | -4.278790000 | -2.733789000 |
| H  | 4.727001000  | -1.949245000 | -4.170642000 |
| H  | 3.298179000  | -3.989480000 | -4.332608000 |
| H  | 0.879692000  | 0.969346000  | -3.049413000 |
| C  | -2.479542000 | -2.255871000 | -0.266159000 |
| C  | -3.455511000 | -3.061085000 | 0.336022000  |
| C  | -2.416084000 | -2.182357000 | -1.661555000 |
| C  | -4.375796000 | -3.752947000 | -0.448183000 |
| C  | -3.334288000 | -2.879172000 | -2.444283000 |
| C  | -4.319627000 | -3.657601000 | -1.839505000 |
| H  | -3.503352000 | -3.139353000 | 1.426871000  |
| H  | -1.644347000 | -1.562711000 | -2.125125000 |
| H  | -5.141091000 | -4.369735000 | 0.029386000  |
| H  | -3.287043000 | -2.796803000 | -3.532625000 |
| H  | -5.047624000 | -4.193916000 | -2.453099000 |
| C  | -2.153870000 | -0.760974000 | 2.200461000  |
| C  | -3.491809000 | -0.354498000 | 2.070345000  |
| C  | -1.482097000 | -0.453245000 | 3.395284000  |

<sup>‡</sup>Int\_16, -4265.38352, NImag=0

|    |              |              |              |
|----|--------------|--------------|--------------|
| Co | -0.204426000 | 0.476342000  | -0.382171000 |
| P  | -0.524173000 | -1.608668000 | 0.611137000  |
| C  | 0.966799000  | -2.368963000 | 1.370574000  |
| C  | 2.098008000  | -2.436791000 | 0.538204000  |
| C  | 1.112059000  | -2.777486000 | 2.700404000  |
| C  | 3.348023000  | -2.809704000 | 1.025485000  |
| C  | 2.353244000  | -3.175073000 | 3.198294000  |
| C  | 3.471812000  | -3.168399000 | 2.366924000  |
| H  | 0.242881000  | -2.770132000 | 3.363186000  |
| H  | 4.213468000  | -2.815971000 | 0.358724000  |
| H  | 2.446842000  | -3.480961000 | 4.242544000  |
| H  | 4.450751000  | -3.455348000 | 2.757827000  |
| P  | 2.087987000  | 0.789780000  | -0.340861000 |
| C  | 3.141508000  | -0.215794000 | -1.471975000 |
| C  | 2.882503000  | -1.595567000 | -1.549378000 |
| C  | 4.168426000  | 0.293555000  | -2.279694000 |
| C  | 3.580009000  | -2.426698000 | -2.422443000 |
| C  | 4.883717000  | -0.531780000 | -3.145902000 |
| C  | 4.582280000  | -1.890665000 | -3.227163000 |
| O  | 1.877720000  | -2.134385000 | -0.783700000 |
| H  | 4.412677000  | 1.357821000  | -2.232345000 |
| H  | 3.322161000  | -3.487069000 | -2.453270000 |
| H  | 5.678207000  | -0.107606000 | -3.763472000 |
| H  | 5.132238000  | -2.537831000 | -3.913821000 |
| H  | -0.099113000 | 2.300785000  | -2.502198000 |
| C  | -1.075651000 | -2.977059000 | -0.480539000 |
| C  | -1.492270000 | -4.212726000 | 0.031644000  |
| C  | -1.040444000 | -2.786095000 | -1.865689000 |
| C  | -1.903345000 | -5.227580000 | -0.830257000 |
| C  | -1.448612000 | -3.802112000 | -2.726835000 |
| C  | -1.888314000 | -5.020131000 | -2.210345000 |
| H  | -1.503140000 | -4.380288000 | 1.113544000  |
| H  | -0.695527000 | -1.825703000 | -2.260078000 |
| H  | -2.236432000 | -6.185185000 | -0.422608000 |
| H  | -1.436827000 | -3.632351000 | -3.806021000 |
| H  | -2.218570000 | -5.813930000 | -2.884907000 |
| C  | -1.745092000 | -1.555910000 | 1.972846000  |
| C  | -3.059496000 | -2.014766000 | 1.809040000  |
| C  | -1.432487000 | -0.837528000 | 3.138398000  |

C -4.133139000 0.332920000 3.098523000  
C -2.127022000 0.225543000 4.426401000  
C -3.454964000 0.626630000 4.280649000  
H -4.032854000 -0.564181000 1.143903000  
H -0.433135000 -0.736491000 3.523358000  
H -5.173834000 0.641695000 2.971024000  
H -1.584003000 0.448106000 5.348144000  
H -3.958393000 1.165900000 5.086398000  
C 3.034786000 1.500670000 -0.769278000  
C 3.558686000 2.234045000 0.307164000  
C 3.192375000 2.023576000 -2.063514000  
C 4.238105000 3.431749000 0.095977000  
C 3.883171000 3.214903000 -2.275452000  
C 4.412496000 3.923263000 -1.196764000  
H 3.426619000 1.870702000 1.329623000  
H 2.779528000 1.494981000 -2.925404000  
H 4.633305000 3.982933000 0.952607000  
H 4.004170000 3.592464000 -3.293603000  
H 4.953463000 4.857634000 -1.363922000  
C 2.929332000 -0.663141000 1.049335000  
C 4.273889000 -1.044649000 0.936920000  
C 2.282786000 -0.827399000 2.274732000  
C 4.948586000 -1.581016000 2.030253000  
C 2.954172000 -1.365731000 3.371937000  
C 4.289132000 -1.744539000 3.250574000  
H 4.797993000 -0.922932000 -0.016120000  
H 1.232082000 -0.541140000 2.353533000  
H 5.996029000 -1.875866000 1.930387000  
H 2.426694000 -1.497470000 4.320379000  
H 4.818921000 -2.170741000 4.105903000  
N -0.971896000 0.947906000 -2.088956000  
C -0.189510000 0.917201000 -3.292643000  
H -0.330374000 -0.008795000 -3.893027000  
C -2.333158000 0.934161000 -2.273935000  
C -2.965529000 0.827807000 -3.540141000  
C -3.197128000 0.994111000 -1.146595000  
C -4.352450000 0.744095000 -3.652198000  
C -4.575171000 0.907537000 -1.272533000  
C -5.177229000 0.772244000 -2.528792000  
H -2.363350000 0.789998000 -4.449617000  
H -2.751178000 1.138020000 -0.156284000  
H -4.796532000 0.649831000 -4.648101000  
H -5.197297000 0.959834000 -0.372232000  
H -6.262545000 0.703555000 -2.626447000  
H -0.404679000 1.761572000 -3.979855000  
C 0.081147000 4.396135000 0.621835000  
C -1.395013000 3.926464000 0.837674000  
C 0.565203000 4.161802000 -0.798516000  
O 0.829640000 3.475227000 1.469701000  
C 0.368543000 5.809492000 1.073295000  
O -1.218299000 2.504272000 1.139705000  
C -2.277415000 4.075247000 -0.378564000  
C -2.044492000 4.532526000 2.069117000  
H -1.914637000 3.469986000 -1.218538000  
H -2.318282000 5.129185000 -0.691613000  
H -3.302144000 3.750030000 -0.156394000  
H -1.397094000 4.447028000 2.953349000  
H -2.978696000 3.997226000 2.285243000  
H -2.285501000 5.594019000 1.918497000  
H -0.242120000 6.529387000 0.509362000  
H 1.424563000 6.052695000 0.893635000  
H 0.169415000 5.949495000 2.142642000  
H 0.346811000 3.132034000 -1.128007000  
H 1.651830000 4.314021000 -0.844630000  
H 0.091002000 4.852749000 -1.509155000  
B 0.064146000 2.361118000 1.584409000  
H 0.455891000 1.324537000 2.041712000

<sup>3</sup>TS\_18, -4265.38074, NImag=1

Co -0.109157000 0.455375000 -0.416893000  
P -0.251117000 -1.695039000 0.402590000  
C 1.282244000 -2.345105000 1.180154000  
C 2.455593000 -2.245449000 0.411739000  
C 1.408870000 -2.783298000 2.503039000  
C 3.713866000 -2.488134000 0.957500000  
C 2.660630000 -3.051457000 3.057210000  
C 3.811754000 -2.881524000 2.291032000  
H 0.513511000 -2.899812000 3.118628000  
H 4.607063000 -2.366390000 0.340359000  
H 2.734964000 -3.382184000 4.095373000  
H 4.796713000 -3.065751000 2.726076000  
P 2.097615000 0.987868000 -0.272707000  
C 3.343995000 0.185741000 -1.371348000  
C 3.255875000 -1.203616000 -1.565873000  
C 4.348765000 0.872430000 -2.068558000

C -4.026701000 -1.766716000 2.781825000  
C -2.392706000 -0.605780000 4.117809000  
C -3.697761000 -1.065669000 3.940516000  
H -3.337727000 -2.553213000 0.899738000  
H -0.422078000 -0.439410000 3.276935000  
H -5.047397000 -2.126456000 2.629077000  
H -2.123925000 -0.047770000 5.018254000  
H -4.456799000 -0.874652000 4.703058000  
C 2.435608000 2.521016000 -0.837418000  
C 2.595917000 3.511053000 0.143114000  
C 2.371879000 2.915194000 -2.183656000  
C 2.701428000 4.853881000 -0.213509000  
C 2.487910000 4.257005000 -2.538233000  
C 2.651511000 5.231682000 -1.554122000  
H 2.633496000 3.230825000 1.199529000  
H 2.229371000 2.164478000 -2.965938000  
H 2.824336000 5.610002000 0.565307000  
H 2.443703000 4.542360000 -3.591983000  
H 2.736972000 6.284426000 -1.832694000  
C 3.055765000 0.656784000 1.225053000  
C 4.455030000 0.742720000 1.235201000  
C 2.380131000 0.465154000 2.432314000  
C 5.158128000 0.635763000 2.432160000  
C 3.082445000 0.355770000 3.632008000  
C 4.473054000 0.439609000 3.633222000  
H 5.000329000 0.892184000 0.298302000  
H 1.288772000 0.391039000 2.417219000  
H 6.248687000 0.704067000 2.429071000  
H 2.538858000 0.193553000 4.566366000  
H 5.027195000 0.349699000 4.570566000  
N -1.331601000 0.703163000 -1.950958000  
C -0.776504000 1.564460000 -2.963045000  
H -0.191312000 1.028472000 -3.741365000  
C -2.489715000 0.043644000 -2.278087000  
C -2.941870000 -0.133108000 -3.610334000  
C -3.300688000 -0.505479000 -1.252849000  
C -4.098201000 -0.859778000 -3.886466000  
C -4.452220000 -1.223702000 -1.542039000  
C -4.863708000 -1.421384000 -2.864375000  
H -2.358954000 0.272551000 -4.440179000  
H -3.013155000 -0.310703000 -0.216430000  
H -4.403697000 -0.992712000 -4.928832000  
H -5.053286000 -1.621938000 -0.171342000  
H -5.770032000 -1.986953000 -3.090604000  
H -1.550592000 2.145842000 -3.501847000  
C -2.616692000 3.702809000 0.364821000  
C -3.351690000 2.727122000 1.352616000  
C -3.093421000 3.554383000 -1.069580000  
O -1.244911000 3.227492000 0.417846000  
C -2.634257000 5.156373000 0.786167000  
O -2.530400000 1.536980000 1.291920000  
C -4.762887000 2.359674000 0.946998000  
C -3.312739000 3.203411000 2.796325000  
H -4.790374000 1.863796000 -0.030987000  
H -5.406424000 3.251054000 0.907459000  
H -5.194293000 1.665885000 1.682080000  
H -2.290254000 3.463614000 3.104791000  
H -3.665821000 2.397456000 3.453430000  
H -3.954662000 4.081044000 2.957066000  
H -3.665644000 5.534148000 0.844987000  
H -2.096224000 5.767288000 0.049010000  
H -2.153336000 5.309895000 1.759669000  
H -3.093617000 2.502409000 -1.385226000  
H -2.415216000 4.104084000 -1.736316000  
H -4.105517000 3.961106000 -1.202967000  
B -1.307738000 1.911948000 0.801322000  
H -0.256443000 1.304081000 1.151550000

<sup>3</sup>Int\_17, -4265.39704, NImag=0

Co -0.163825000 0.196801000 -0.573794000  
P -0.133681000 -1.854355000 0.401504000  
C 1.374836000 -2.137605000 1.406277000  
C 2.618847000 -1.969475000 0.773555000  
C 1.369242000 -2.311982000 2.795543000  
C 3.806813000 -1.913119000 1.499531000  
C 2.552734000 -2.275400000 3.532119000  
C 3.767239000 -2.058241000 2.885115000  
H 0.416748000 -2.452312000 3.313396000  
H 4.753708000 -1.751298000 0.979266000  
H 2.521756000 -2.401096000 4.616445000  
H 4.696057000 -2.005442000 3.457672000  
P 1.907423000 1.022377000 -0.382655000  
C 3.400153000 0.304003000 -1.194344000  
C 3.536168000 -1.095511000 -1.223614000  
C 4.386394000 1.059868000 -1.845802000

|   |              |              |              |   |              |              |              |
|---|--------------|--------------|--------------|---|--------------|--------------|--------------|
| C | 4.100094000  | -1.877435000 | -2.445149000 | C | 4.578495000  | -1.718134000 | -1.906246000 |
| C | 5.210271000  | 0.205874000  | -2.938168000 | C | 5.443635000  | 0.448341000  | -2.517062000 |
| C | 5.078789000  | -1.168084000 | -3.136737000 | C | 5.533133000  | -0.942637000 | -2.559329000 |
| O | 2.280180000  | -1.913856000 | -0.910359000 | O | 2.598201000  | -1.882397000 | -0.598207000 |
| H | 4.454204000  | 1.952189000  | -1.934729000 | H | 4.318543000  | 2.151012000  | -1.836441000 |
| H | 3.973043000  | -2.954399000 | -2.570244000 | H | 4.623507000  | -2.808826000 | -1.908838000 |
| H | 5.983764000  | 0.765954000  | -3.467786000 | H | 6.196894000  | 1.062858000  | -3.014597000 |
| H | 5.743306000  | -1.691743000 | -3.827419000 | H | 6.352495000  | -1.426806000 | -3.095200000 |
| H | -0.508937000 | 2.781464000  | -1.763137000 | H | -0.831433000 | 2.449211000  | -2.171907000 |
| C | -0.558766000 | -2.942111000 | -0.906301000 | C | -0.131080000 | -3.253337000 | -0.779859000 |
| C | -0.551398000 | -4.317975000 | -0.642721000 | C | 0.465018000  | -4.488822000 | -0.493852000 |
| C | -0.774536000 | -2.496048000 | -2.213871000 | C | -0.742350000 | -3.062889000 | -2.025120000 |
| C | -0.785999000 | -5.230125000 | -1.669664000 | C | 0.431565000  | -5.519563000 | -1.430717000 |
| C | -1.013248000 | -3.407604000 | -3.240505000 | C | -0.783403000 | -4.097792000 | -2.958180000 |
| C | -1.023399000 | -4.774732000 | -2.968058000 | C | -0.197014000 | -5.327298000 | -2.662258000 |
| H | -0.365845000 | -4.676800000 | 0.374987000  | H | 0.959357000  | -4.643557000 | 0.470645000  |
| H | -0.759301000 | -1.420869000 | -2.420647000 | H | -1.198485000 | -2.096327000 | -2.263075000 |
| H | -0.783770000 | -6.301894000 | -1.456482000 | H | 0.898862000  | -6.479792000 | -1.198599000 |
| H | -1.199231000 | -3.044484000 | -4.253981000 | H | -1.275309000 | -3.936289000 | -3.920324000 |
| H | -1.213784000 | -5.491362000 | -3.770810000 | H | -0.224502000 | -6.138155000 | -3.394202000 |
| C | -1.528793000 | -2.030506000 | 1.674422000  | C | -1.457760000 | -2.284691000 | 1.598728000  |
| C | -2.649719000 | -2.835300000 | 1.432630000  | C | -2.054208000 | -3.549318000 | 1.668943000  |
| C | -1.462917000 | -1.325141000 | 2.885828000  | C | -1.919725000 | -1.266466000 | 2.446042000  |
| C | -3.668639000 | -2.938063000 | 2.379492000  | C | -3.088395000 | -3.791468000 | 2.573080000  |
| C | -2.465070000 | -1.448610000 | 3.842063000  | C | -2.947547000 | -1.512295000 | 3.352373000  |
| C | -3.577129000 | -2.252862000 | 3.589330000  | C | -3.536371000 | -2.775677000 | 3.416380000  |
| H | -2.742966000 | -3.369496000 | 0.483610000  | H | -1.722606000 | -4.349790000 | 1.002173000  |
| H | -0.619809000 | -0.652545000 | 3.076577000  | H | -1.499031000 | -0.258901000 | 2.360661000  |
| H | -4.540399000 | -3.561628000 | 2.166435000  | H | -3.551707000 | -4.780350000 | 2.612381000  |
| H | -2.387906000 | -0.896749000 | 4.782148000  | H | -3.305866000 | -0.706813000 | 3.998183000  |
| H | -4.373568000 | -2.339302000 | 4.332407000  | H | -4.352281000 | -2.965297000 | 4.117856000  |
| C | 2.240973000  | 2.761124000  | -0.715973000 | C | 1.798375000  | 2.701799000  | -1.107096000 |
| C | 2.271294000  | 3.750697000  | 0.276185000  | C | 1.410099000  | 3.784582000  | -0.306404000 |
| C | 2.139903000  | 3.157052000  | -2.059504000 | C | 1.883910000  | 2.886292000  | -2.497202000 |
| C | 2.217867000  | 5.100651000  | -0.068617000 | C | 1.136248000  | 5.024934000  | -0.878768000 |
| C | 2.099356000  | 4.505444000  | -2.401789000 | C | 1.619191000  | 4.129426000  | -3.065021000 |
| C | 2.137310000  | 5.482643000  | -1.406318000 | C | 1.244349000  | 5.203638000  | -2.256446000 |
| H | 2.332442000  | 3.464979000  | 1.330052000  | H | 1.297159000  | 3.651387000  | 0.773463000  |
| H | 2.083278000  | 2.399916000  | -2.848044000 | H | 2.151419000  | 2.044684000  | -3.144169000 |
| H | 2.239437000  | 5.858813000  | 0.717548000  | H | 0.827942000  | 5.855990000  | -0.240404000 |
| H | 2.026881000  | 4.794683000  | -3.452867000 | H | 1.697016000  | 4.257670000  | -4.147364000 |
| H | 2.097362000  | 6.540808000  | -1.674217000 | H | 1.028969000  | 6.177042000  | -2.702910000 |
| C | 2.949962000  | 0.916053000  | 1.358358000  | C | 2.516845000  | 1.345287000  | 1.324401000  |
| C | 4.323520000  | 1.160365000  | 1.494250000  | C | 3.801539000  | 1.849654000  | 1.568965000  |
| C | 2.197171000  | 0.610344000  | 2.495038000  | C | 1.665847000  | 1.092621000  | 2.404897000  |
| C | 4.926400000  | 1.100350000  | 2.747940000  | C | 4.222016000  | 2.099097000  | 2.872741000  |
| C | 2.800103000  | 0.547891000  | 3.750658000  | C | 2.087048000  | 1.343917000  | 3.710396000  |
| C | 4.165831000  | 0.792468000  | 3.878202000  | C | 3.364863000  | 1.846694000  | 3.946014000  |
| H | 4.926692000  | 1.397690000  | 0.612481000  | H | 4.479592000  | 2.048854000  | 0.733555000  |
| H | 1.127154000  | 0.412104000  | 2.375012000  | H | 0.665940000  | 0.692810000  | 2.207090000  |
| H | 5.997522000  | 1.293226000  | 2.845331000  | H | 5.224548000  | 2.494267000  | 3.053789000  |
| H | 2.200547000  | 0.297409000  | 4.629602000  | H | 1.413174000  | 1.137298000  | 4.545732000  |
| H | 4.642536000  | 0.740835000  | 4.860005000  | H | 3.697395000  | 2.042152000  | 4.968372000  |
| N | -1.619690000 | 1.014643000  | -1.575038000 | N | -1.954551000 | 0.822152000  | -1.470485000 |
| C | -1.221132000 | 2.172127000  | -2.341415000 | C | -1.515942000 | 1.686729000  | -2.560731000 |
| H | -0.736533000 | 1.920185000  | -3.307205000 | H | -1.001521000 | 1.117946000  | -3.354205000 |
| C | -2.695511000 | 0.303134000  | -2.056182000 | C | -2.884760000 | -0.176601000 | -1.828605000 |
| C | -3.281477000 | 0.543045000  | -3.324778000 | C | -3.251315000 | -0.398327000 | -3.170337000 |
| C | -3.276206000 | -0.726973000 | -1.275975000 | C | -3.434046000 | -1.035137000 | -0.854126000 |
| C | -4.355307000 | -0.222050000 | -3.779118000 | C | -4.099814000 | -1.451290000 | -3.518887000 |
| C | -4.347848000 | -1.475580000 | -1.737070000 | C | -4.277743000 | -2.077099000 | -1.213575000 |
| C | -4.902122000 | -1.240123000 | -3.000215000 | C | -4.615991000 | -2.305665000 | -2.550374000 |
| H | -2.878469000 | 1.321225000  | -3.975408000 | H | -2.870916000 | 0.245724000  | -3.962941000 |
| H | -2.876932000 | -0.899882000 | -0.277354000 | H | -3.197084000 | -0.869193000 | 0.193829000  |
| H | -4.768882000 | -0.013830000 | -4.770541000 | H | -4.356298000 | -1.596434000 | -4.571969000 |
| H | -4.764619000 | -2.257401000 | -1.093381000 | H | -4.677315000 | -2.724306000 | -0.427744000 |
| H | -5.743485000 | -1.833715000 | -3.363785000 | H | -5.275818000 | -3.130676000 | -2.827107000 |
| H | -2.069346000 | 2.841421000  | -2.581731000 | H | -2.358317000 | 2.227446000  | -3.028178000 |
| C | -3.354135000 | 3.201406000  | 0.764433000  | C | -3.076021000 | 3.539631000  | 0.381181000  |
| C | -3.735589000 | 1.915301000  | 1.589135000  | C | -3.445814000 | 2.464582000  | 1.453170000  |
| C | -4.038911000 | 3.260638000  | -0.590576000 | C | -4.128083000 | 3.622139000  | -0.720181000 |
| O | -1.931946000 | 3.031735000  | 0.551692000  | O | -1.877335000 | 3.001043000  | -0.167579000 |
| C | -3.566081000 | 4.505626000  | 1.506627000  | C | -2.783214000 | 4.919545000  | 0.936655000  |
| O | -2.710393000 | 0.973978000  | 1.214172000  | O | -3.077302000 | 1.258430000  | 0.792172000  |
| C | -5.084749000 | 1.317897000  | 1.248186000  | C | -4.916501000 | 2.392864000  | 1.810531000  |
| C | -3.608663000 | 2.116080000  | 3.092508000  | C | -2.599181000 | 2.615095000  | 2.714767000  |
| H | -5.154463000 | 1.042479000  | 0.188699000  | H | -5.529041000 | 2.134455000  | 0.938029000  |
| H | -5.900334000 | 2.017006000  | 1.486579000  | H | -5.276756000 | 3.347637000  | 2.222714000  |
| H | -5.240569000 | 0.401692000  | 1.835743000  | H | -5.084550000 | 1.615279000  | 2.569611000  |
| H | -2.618812000 | 2.512967000  | 3.360173000  | H | -1.530316000 | 2.699409000  | 2.466017000  |
| H | -3.728525000 | 1.147749000  | 3.597037000  | H | -2.730308000 | 1.728562000  | 3.351888000  |
| H | -4.372873000 | 2.801492000  | 3.485362000  | H | -2.883898000 | 3.496319000  | 3.308391000  |
| H | -4.625543000 | 4.639859000  | 1.770434000  | H | -3.648257000 | 5.325746000  | 1.482968000  |
| H | -3.270981000 | 5.350932000  | 0.870526000  | H | -2.549686000 | 5.616216000  | 0.118736000  |

|                                     |              |              |              |
|-------------------------------------|--------------|--------------|--------------|
| H                                   | -2.970799000 | 4.558742000  | 2.425962000  |
| H                                   | -3.917062000 | 2.327882000  | -1.156750000 |
| H                                   | -3.604056000 | 4.077801000  | -1.182314000 |
| H                                   | -5.115320000 | 3.457360000  | -0.486954000 |
| B                                   | -1.668344000 | 1.686176000  | 0.672182000  |
| H                                   | -0.479254000 | 1.386699000  | 0.987967000  |
| <b>TS_19</b> , -4265.37577, NImag=1 |              |              |              |
| Co                                  | -0.078901000 | -0.383530000 | -0.565943000 |
| P                                   | 1.862619000  | -1.180306000 | 0.261653000  |
| C                                   | 2.440708000  | -0.127227000 | 1.644033000  |
| C                                   | 2.797913000  | 1.190480000  | 1.310546000  |
| C                                   | 2.386040000  | -0.469841000 | 2.999083000  |
| C                                   | 3.040749000  | 2.153539000  | 2.287007000  |
| C                                   | 2.643554000  | 0.480215000  | 3.987453000  |
| C                                   | 2.954977000  | 1.791404000  | 3.630496000  |
| H                                   | 2.114008000  | -1.490183000 | 3.283846000  |
| H                                   | 3.285309000  | 3.176831000  | 1.992193000  |
| H                                   | 2.585901000  | 0.197465000  | 5.040868000  |
| H                                   | 3.133928000  | 2.544086000  | 4.401852000  |
| P                                   | -0.073298000 | 1.835953000  | -0.243122000 |
| C                                   | 1.258714000  | 3.067295000  | -0.678983000 |
| C                                   | 2.605382000  | 2.691759000  | -0.524012000 |
| C                                   | 1.022368000  | 4.355589000  | -1.185921000 |
| C                                   | 3.657860000  | 3.522036000  | -0.905235000 |
| C                                   | 2.065053000  | 5.203516000  | -1.555304000 |
| C                                   | 3.388063000  | 4.782640000  | -1.429546000 |
| O                                   | 2.915321000  | 1.448391000  | -0.031010000 |
| H                                   | -0.005071000 | 4.709534000  | -1.297050000 |
| H                                   | 4.678956000  | 3.156936000  | -0.777437000 |
| H                                   | 1.838865000  | 6.198659000  | -1.944736000 |
| H                                   | 4.209652000  | 5.437415000  | -1.728374000 |
| H                                   | -3.578910000 | 0.555080000  | -2.512883000 |
| C                                   | 3.378252000  | -1.309993000 | -0.768766000 |
| C                                   | 4.664948000  | -1.438771000 | -0.229190000 |
| C                                   | 3.233371000  | -1.189243000 | -2.153984000 |
| C                                   | 5.779846000  | -1.474509000 | -1.064525000 |
| C                                   | 4.346276000  | -1.231111000 | -2.992104000 |
| C                                   | 5.621796000  | -1.376819000 | -2.448166000 |
| H                                   | 4.794768000  | -1.500149000 | 0.856365000  |
| H                                   | 2.231114000  | -1.045958000 | -2.570666000 |
| H                                   | 6.779392000  | -1.573949000 | -0.633803000 |
| H                                   | 4.216968000  | -1.138367000 | -4.073543000 |
| H                                   | 6.497220000  | -1.403317000 | -3.101668000 |
| C                                   | 1.715960000  | -2.832121000 | 1.056897000  |
| C                                   | 2.678284000  | -3.845193000 | 0.966424000  |
| C                                   | 0.517147000  | -3.096270000 | 1.739192000  |
| C                                   | 2.450402000  | -5.091605000 | 1.551503000  |
| C                                   | 0.296136000  | -4.337654000 | 2.330341000  |
| C                                   | 1.262232000  | -5.340956000 | 2.236489000  |
| H                                   | 3.609150000  | -3.672089000 | 0.420645000  |
| H                                   | -0.253955000 | -2.315744000 | 1.761632000  |
| H                                   | 3.207858000  | -5.874805000 | 1.466515000  |
| H                                   | -0.642791000 | -4.529181000 | 2.856547000  |
| H                                   | 1.085599000  | -6.318816000 | 2.691025000  |
| C                                   | -1.546818000 | 2.593152000  | -1.038333000 |
| C                                   | -2.774506000 | 2.598008000  | -0.363426000 |
| C                                   | -1.516438000 | 3.029798000  | -2.373282000 |
| C                                   | -3.930776000 | 3.056730000  | -0.992287000 |
| C                                   | -2.668210000 | 3.503248000  | -2.995987000 |
| C                                   | -3.881231000 | 3.521632000  | -2.304998000 |
| H                                   | -2.827945000 | 2.222557000  | 0.662272000  |
| H                                   | -0.576892000 | 2.999233000  | -2.933984000 |
| H                                   | -4.879193000 | 3.042615000  | -0.449943000 |
| H                                   | -2.620104000 | 3.852311000  | -4.030587000 |
| H                                   | -4.786418000 | 3.889862000  | -2.793735000 |
| C                                   | -0.332765000 | 2.323071000  | 1.528799000  |
| C                                   | -0.398382000 | 3.674065000  | 1.899261000  |
| C                                   | -0.470065000 | 1.342768000  | 2.515165000  |
| C                                   | -0.603084000 | 4.034138000  | 3.228890000  |
| C                                   | -0.668924000 | 1.704288000  | 3.847903000  |
| C                                   | -0.738373000 | 3.048160000  | 4.208370000  |
| H                                   | -0.290562000 | 4.455933000  | 1.141755000  |
| H                                   | -0.428534000 | 0.293235000  | 2.209527000  |
| H                                   | -0.657961000 | 5.090846000  | 3.502503000  |
| H                                   | -0.762823000 | 0.925173000  | 4.609466000  |
| H                                   | -0.895937000 | 3.331391000  | 5.252240000  |
| N                                   | -2.396078000 | -1.079667000 | -1.974755000 |
| C                                   | -2.778724000 | -0.062198000 | -2.932919000 |
| H                                   | -1.936163000 | 0.602614000  | -3.175561000 |
| C                                   | -1.284000000 | -1.871202000 | -2.290086000 |
| C                                   | -0.605206000 | -1.722417000 | -3.523679000 |
| C                                   | -0.817743000 | -2.870560000 | -1.401096000 |
| C                                   | 0.452348000  | -2.563121000 | -3.863218000 |
| C                                   | 0.242347000  | -3.701147000 | -1.764176000 |

|                                      |              |              |              |
|--------------------------------------|--------------|--------------|--------------|
| H                                    | -1.919225000 | 4.906312000  | 1.613951000  |
| H                                    | -4.384685000 | 2.620933000  | -1.097351000 |
| H                                    | -3.728281000 | 4.208539000  | -1.559664000 |
| H                                    | -5.054767000 | 4.109037000  | -0.381428000 |
| B                                    | -1.955929000 | 1.568307000  | -0.042485000 |
| H                                    | -0.842638000 | 1.220297000  | 0.592636000  |
| <b>Int_18</b> , -3853.79568, NImag=0 |              |              |              |
| Co                                   | -0.076510000 | -0.656702000 | -1.270206000 |
| P                                    | -1.401407000 | 0.838979000  | -0.002713000 |
| C                                    | -0.399374000 | 1.947696000  | 1.068156000  |
| C                                    | 0.435843000  | 1.327166000  | 2.012494000  |
| C                                    | -0.242886000 | 3.327103000  | 0.883494000  |
| C                                    | 1.384984000  | 2.040474000  | 2.741171000  |
| C                                    | 0.698081000  | 4.055101000  | 1.610261000  |
| C                                    | 1.514544000  | 3.411669000  | 2.536321000  |
| H                                    | -0.832470000 | 3.841235000  | 0.122478000  |
| H                                    | 2.028228000  | 1.514053000  | 3.450012000  |
| H                                    | 0.809058000  | 5.126465000  | 1.429863000  |
| H                                    | 2.265961000  | 3.972918000  | 3.096243000  |
| P                                    | 1.969691000  | -0.406999000 | -0.296100000 |
| C                                    | 2.341194000  | -1.012426000 | 1.414518000  |
| C                                    | 1.390347000  | -0.792191000 | 2.429694000  |
| C                                    | 3.474177000  | -1.765925000 | 1.759783000  |
| C                                    | 1.521184000  | -1.353318000 | 3.697791000  |
| C                                    | 3.628310000  | -2.312756000 | 3.032734000  |
| C                                    | 2.640967000  | -2.124742000 | 3.998631000  |
| O                                    | 0.276916000  | -0.028284000 | 2.173403000  |
| H                                    | 4.253515000  | -1.934847000 | 1.012758000  |
| H                                    | 0.739343000  | -1.160606000 | 4.435106000  |
| H                                    | 4.523387000  | -2.893101000 | 3.266590000  |
| H                                    | 2.748590000  | -2.563891000 | 4.992820000  |
| H                                    | 0.538475000  | 0.407341000  | -2.306796000 |
| C                                    | -2.671705000 | 0.141311000  | 1.149241000  |
| C                                    | -3.880135000 | 0.758827000  | 1.496408000  |
| C                                    | -2.410297000 | -1.138363000 | 1.658759000  |
| C                                    | -4.785686000 | 0.125228000  | 2.346837000  |
| C                                    | -3.312549000 | -1.771456000 | 2.508203000  |
| C                                    | -4.503493000 | -1.138630000 | 2.860353000  |
| H                                    | -4.143905000 | 1.736046000  | 1.091825000  |
| H                                    | -1.487502000 | -1.645013000 | 1.365312000  |
| H                                    | -5.723588000 | 0.624669000  | 2.601883000  |
| H                                    | -3.090423000 | -2.774983000 | 2.879585000  |
| H                                    | -5.217418000 | -1.636421000 | 3.520977000  |
| C                                    | -2.321434000 | 2.017483000  | -1.072691000 |
| C                                    | -3.055579000 | 3.119375000  | -0.601640000 |
| C                                    | -2.268549000 | 1.799333000  | -2.457103000 |
| C                                    | -3.738964000 | 3.952825000  | -1.484563000 |
| C                                    | -2.954916000 | 2.630637000  | -3.341522000 |
| C                                    | -3.696717000 | 3.705621000  | -2.856974000 |
| H                                    | -3.076578000 | 3.348771000  | 0.466364000  |
| H                                    | -1.656746000 | 0.975393000  | -2.840733000 |
| H                                    | -4.303698000 | 4.804381000  | -1.097452000 |
| H                                    | -2.901711000 | 2.437935000  | -4.415438000 |
| H                                    | -4.234268000 | 4.359300000  | -3.548072000 |
| C                                    | 3.129170000  | -1.369428000 | -1.345272000 |
| C                                    | 3.763489000  | -0.738102000 | -2.425381000 |
| C                                    | 3.282984000  | -2.757734000 | -1.199144000 |
| C                                    | 4.542388000  | -1.469544000 | -3.319608000 |
| C                                    | 4.066411000  | -3.486470000 | -2.091817000 |
| C                                    | 4.699711000  | -2.844746000 | -3.155296000 |
| H                                    | 3.642567000  | 0.338437000  | -2.571769000 |
| H                                    | 2.795686000  | -3.279242000 | -0.370918000 |
| H                                    | 5.028997000  | -0.957535000 | -4.152954000 |
| H                                    | 4.179036000  | -4.564510000 | -1.954702000 |
| H                                    | 5.312054000  | -3.416669000 | -3.856118000 |
| C                                    | 2.774100000  | 1.253036000  | -0.292680000 |
| C                                    | 3.987882000  | 1.449873000  | 0.383192000  |
| C                                    | 2.215816000  | 2.314333000  | -1.010417000 |
| C                                    | 4.631946000  | 2.682789000  | 0.333520000  |
| C                                    | 2.864508000  | 3.548834000  | -1.060426000 |
| C                                    | 4.071728000  | 3.736045000  | -0.391915000 |
| H                                    | 4.437384000  | 0.630700000  | 0.952155000  |
| H                                    | 1.271312000  | 2.149347000  | -1.538675000 |
| H                                    | 5.578908000  | 2.821564000  | 0.860856000  |
| H                                    | 2.415535000  | 4.370916000  | -1.623808000 |
| H                                    | 4.578849000  | 4.703233000  | -0.433081000 |
| N                                    | -1.126056000 | -2.274328000 | -1.636361000 |
| C                                    | -0.106773000 | -2.668901000 | -0.849170000 |
| H                                    | -0.288496000 | -3.075469000 | 0.164032000  |
| C                                    | -2.444247000 | -2.488032000 | -1.258117000 |
| C                                    | -2.831636000 | -3.656443000 | -0.571748000 |
| C                                    | -3.442916000 | -1.564615000 | -1.618072000 |
| C                                    | -4.161943000 | -3.859866000 | -0.217984000 |
| C                                    | -4.764306000 | -1.766258000 | -1.242902000 |



|                              |              |              |              |   |              |              |              |
|------------------------------|--------------|--------------|--------------|---|--------------|--------------|--------------|
| C                            | 0.885710000  | -3.561633000 | -2.991956000 | C | -5.135521000 | -2.912205000 | -0.534334000 |
| H                            | -0.927871000 | -0.968801000 | -4.241448000 | H | -2.076588000 | -4.410706000 | -0.335920000 |
| H                            | -1.336589000 | -3.032872000 | -0.458373000 | H | -3.152186000 | -0.669087000 | -2.172521000 |
| H                            | 0.945856000  | -2.426257000 | -4.829367000 | H | -4.441525000 | -4.772836000 | 0.314986000  |
| H                            | 0.559735000  | -4.476943000 | -1.062504000 | H | -5.516141000 | -1.017473000 | -1.506110000 |
| H                            | 1.716246000  | -4.216250000 | -3.264229000 | H | -6.176435000 | -3.069400000 | -0.243536000 |
| H                            | -3.135384000 | -0.505809000 | -3.878262000 | H | 0.800543000  | -3.038744000 | -1.346889000 |
| C                            | -5.049297000 | -0.835562000 | 0.487569000  |   |              |              |              |
| C                            | -4.222221000 | -2.030136000 | 1.078061000  |   |              |              |              |
| C                            | -6.257101000 | -1.295813000 | -0.314549000 |   |              |              |              |
| O                            | -4.122618000 | -0.247626000 | -0.446391000 |   |              |              |              |
| C                            | -5.453306000 | 0.211861000  | 1.503578000  |   |              |              |              |
| O                            | -3.336394000 | -2.354532000 | -0.016116000 |   |              |              |              |
| C                            | -5.041330000 | -3.259392000 | 1.410890000  |   |              |              |              |
| C                            | -3.371698000 | -1.619045000 | 2.269047000  |   |              |              |              |
| H                            | -5.548470000 | -3.667839000 | 0.528620000  |   |              |              |              |
| H                            | -5.799770000 | -3.030835000 | 2.174029000  |   |              |              |              |
| H                            | -4.390298000 | -4.047101000 | 1.813453000  |   |              |              |              |
| H                            | -2.770918000 | -0.727669000 | 2.041294000  |   |              |              |              |
| H                            | -2.671770000 | -2.430580000 | 2.512286000  |   |              |              |              |
| H                            | -3.988541000 | -1.424981000 | 3.158229000  |   |              |              |              |
| H                            | -6.085979000 | -0.226632000 | 2.289194000  |   |              |              |              |
| H                            | -6.033631000 | 1.008453000  | 1.017955000  |   |              |              |              |
| H                            | -4.581179000 | 0.674535000  | 1.982105000  |   |              |              |              |
| H                            | -5.979228000 | -2.064719000 | -1.048866000 |   |              |              |              |
| H                            | -6.675169000 | -0.442468000 | -0.865398000 |   |              |              |              |
| H                            | -7.048496000 | -1.705396000 | 0.328639000  |   |              |              |              |
| B                            | -3.207087000 | -1.219508000 | -0.782361000 |   |              |              |              |
| *TS_20, -3853.78837, NImag=1 |              |              |              |   |              |              |              |
| Co                           | 0.181675000  | 0.413977000  | -1.376628000 |   |              |              |              |
| P                            | 2.011103000  | -0.291498000 | -0.142778000 |   |              |              |              |
| C                            | 1.690628000  | -2.049881000 | 0.254541000  |   |              |              |              |
| C                            | 0.708068000  | -2.310285000 | 1.229300000  |   |              |              |              |
| C                            | 2.138287000  | -3.128633000 | -0.519907000 |   |              |              |              |
| C                            | 0.192393000  | -3.587347000 | 1.435423000  |   |              |              |              |
| C                            | 1.638714000  | -4.414456000 | -0.315470000 |   |              |              |              |
| C                            | 0.664306000  | -4.641179000 | 0.656336000  |   |              |              |              |
| H                            | 2.867916000  | -2.955791000 | -1.315256000 |   |              |              |              |
| H                            | -0.583812000 | -3.740013000 | 2.189271000  |   |              |              |              |
| H                            | 2.000221000  | -5.239491000 | -0.932894000 |   |              |              |              |
| H                            | 0.257098000  | -5.644000000 | 0.803968000  |   |              |              |              |
| P                            | -1.638043000 | -0.399466000 | -0.202954000 |   |              |              |              |
| C                            | -1.978246000 | -0.610261000 | 1.608924000  |   |              |              |              |
| C                            | -0.949945000 | -1.059162000 | 2.457204000  |   |              |              |              |
| C                            | -3.222834000 | -0.347803000 | 2.202175000  |   |              |              |              |
| C                            | -1.141542000 | -1.221974000 | 3.827860000  |   |              |              |              |
| C                            | -3.429604000 | -0.516183000 | 3.570171000  |   |              |              |              |
| C                            | -2.387553000 | -0.952024000 | 4.387069000  |   |              |              |              |
| O                            | 0.320600000  | -1.226805000 | 1.962739000  |   |              |              |              |
| H                            | -4.049897000 | -0.000175000 | 1.577791000  |   |              |              |              |
| H                            | -0.296286000 | -1.548140000 | 4.437143000  |   |              |              |              |
| H                            | -4.411208000 | -0.301960000 | 3.998238000  |   |              |              |              |
| H                            | -2.541112000 | -1.077788000 | 5.460998000  |   |              |              |              |
| H                            | -0.691014000 | 0.041937000  | -2.608029000 |   |              |              |              |
| C                            | 2.460779000  | 0.563248000  | 1.422586000  |   |              |              |              |
| C                            | 3.738937000  | 0.495660000  | 1.987762000  |   |              |              |              |
| C                            | 1.481951000  | 1.350495000  | 2.043230000  |   |              |              |              |
| C                            | 4.025423000  | 1.186986000  | 3.164958000  |   |              |              |              |
| C                            | 1.767591000  | 2.039459000  | 3.217411000  |   |              |              |              |
| C                            | 3.041005000  | 1.957330000  | 3.782228000  |   |              |              |              |
| H                            | 4.524571000  | -0.093701000 | 1.508299000  |   |              |              |              |
| H                            | 0.487134000  | 1.416693000  | 1.590230000  |   |              |              |              |
| H                            | 5.026539000  | 1.125397000  | 3.598140000  |   |              |              |              |
| H                            | 0.993444000  | 2.652560000  | 3.685287000  |   |              |              |              |
| H                            | 3.268950000  | 2.501943000  | 4.701678000  |   |              |              |              |
| C                            | 3.565828000  | -0.260905000 | -1.098691000 |   |              |              |              |
| C                            | 4.660996000  | -1.107505000 | -0.868630000 |   |              |              |              |
| C                            | 3.658528000  | 0.721025000  | -2.097054000 |   |              |              |              |
| C                            | 5.822503000  | -0.977913000 | -1.627464000 |   |              |              |              |
| C                            | 4.826950000  | 0.854296000  | -2.845755000 |   |              |              |              |
| C                            | 5.907210000  | 0.003322000  | -2.615957000 |   |              |              |              |
| H                            | 4.605877000  | -1.875951000 | -0.091801000 |   |              |              |              |
| H                            | 2.804811000  | 1.387988000  | -2.274076000 |   |              |              |              |
| H                            | 6.668076000  | -1.645080000 | -1.443682000 |   |              |              |              |
| H                            | 4.889944000  | 1.625598000  | -3.616641000 |   |              |              |              |
| H                            | 6.819482000  | 0.103542000  | -3.208788000 |   |              |              |              |
| C                            | -3.102418000 | 0.541625000  | -0.754142000 |   |              |              |              |
| C                            | -3.901146000 | 0.110481000  | -1.821399000 |   |              |              |              |
| C                            | -3.320835000 | 1.818405000  | -0.213837000 |   |              |              |              |
| C                            | -4.908189000 | 0.933916000  | -2.325072000 |   |              |              |              |
| C                            | -4.335233000 | 2.632256000  | -0.710193000 |   |              |              |              |
| C                            | -5.131410000 | 2.192798000  | -1.769077000 |   |              |              |              |
| H                            | -3.730451000 | -0.872945000 | -2.268242000 |   |              |              |              |
| H                            | -2.679537000 | 2.188408000  | 0.593851000  |   |              |              |              |

|   |              |              |              |
|---|--------------|--------------|--------------|
| H | -5.522707000 | 0.586831000  | -3.159240000 |
| H | -4.488717000 | 3.624075000  | -0.278022000 |
| H | -5.921260000 | 2.835331000  | -2.165042000 |
| C | -1.999112000 | -2.127040000 | -0.752832000 |
| C | -3.080370000 | -2.854391000 | -0.233474000 |
| C | -1.162628000 | -2.741042000 | -1.691229000 |
| C | -3.320046000 | -4.161498000 | -0.650078000 |
| C | -1.397480000 | -4.052432000 | -2.102748000 |
| C | -2.477143000 | -4.764772000 | -1.585549000 |
| H | -3.742868000 | -2.394502000 | 0.505909000  |
| H | -0.316791000 | -2.179618000 | -2.101071000 |
| H | -4.169936000 | -4.713652000 | -0.241465000 |
| H | -0.726185000 | -4.519577000 | -2.827628000 |
| H | -2.663819000 | -5.791882000 | -1.908685000 |
| N | 0.347207000  | 2.344262000  | -1.861830000 |
| C | -0.537213000 | 1.746231000  | -2.720283000 |
| H | -1.619109000 | 1.969874000  | -2.655997000 |
| C | -0.022627000 | 3.389734000  | -1.035972000 |
| C | -1.176790000 | 4.181663000  | -1.229360000 |
| C | 0.843132000  | 3.754779000  | 0.018693000  |
| C | -1.472507000 | 5.235410000  | -0.367220000 |
| C | 0.540361000  | 4.805593000  | 0.872786000  |
| C | -0.630095000 | 5.552218000  | 0.698615000  |
| H | -1.842094000 | 3.973134000  | -2.070632000 |
| H | 1.768265000  | 3.185616000  | 0.140344000  |
| H | -2.375849000 | 5.828185000  | -0.541880000 |
| H | 1.233235000  | 5.052414000  | 1.682750000  |
| H | -0.866334000 | 6.382735000  | 1.367353000  |
| H | -0.204674000 | 1.622240000  | -3.761625000 |

## 9. References

---

1. M. Hosseini-Sarvari and H. Sharghi, *J. Org. Chem.*, 2006, **71**, 6652-6654.
2. R. K. Sahoo, N. Sarkar and S. Membenna, *Angew. Chem. Int. Ed.*, 2021, **60**, 11991-12000.
3. V. Pace, K. de la Vega-Hernández, E. Urban and T. Langer, *Org. Lett.*, 2016, **18**, 2750-2753
4. K. Bao, W. Zhang, X. Bu, Z. Song, L. Zhang and M. Cheng, *Chem. Commun.*, 2008, 5429-5431.
5. J. Azuaje, A. Coelho, A. El Maatougui, J. M. Blanco and E. Sotelo, *ACS Comb. Sci.* 2011, **13**, 89-95.
6. M. Magre, M. Szewczyk and M. Rueping, *Org. Lett.* 2020, **22**, 3209-3214.
7. H. Wang, Y. Huang, X. Dai and F. Shi, *Chem. Commun.*, 2017, **53**, 5542-5545.
8. A. Bugarin, K. D. Jones and B. T. Connell, *Chem. Commun.*, 2010, **46**, 1715-1717
9. N. Sun, S. Wang, W. Mo, B. Hu, Z. Shen and X. Hu, *Tetrahedron* 2010, **66**, 7142-7148
10. O. Ogata, H. Nara, M. Fujiwhara, K. Matsumura and Y. Kayaki, *Org. Lett.* 2018, **20**, 3866-3870.
11. M. Kitamura, T. Suga, S. Chiba, and K. Narasaka, *Org. Lett.*, 2004, **6**, 4619-4621.
12. J. Jiao, X.-R. Zhang, N.-H. Chang, J. Wang, J.-F. Wei, X.-Y. Shi and Z.-G. Chen, *J. Org. Chem.*, 2011, **76**, 1180-1183.
13. R. K. Sahoo, N. Sakar and S. Nembenna, *Angew. Chem., Int. Ed.*, 2021, **60**, 11991-12000.
14. Q. Xie and G. Dong, *J. Am. Chem. Soc.*, 2021, **143**, 14422-14427.
15. Y. Yang, M. D. Anker, J. Fang, M. F. Mahon, L. Maron, C. Weetman and M. S. Hill, *Chem. Sci.*, 2017, **8**, 3529-3537.
16. C. R. Aversa-Fleener, D. K. Chang and A. L. Liberman-Martin, *Organometallics*, 2021, **40**, 4050-4054.
17. M. J. Frisch, G. W. Trucks, H. B. Schlegel, G. E. Scuseria, M. A. Robb, J. R. Cheeseman, G. Scalmani, V. Barone, G. A. Petersson, H. Nakatsuji and et. al., *Gaussian 09; Revision C.01*, Gaussian, Inc., Wallingford CT, 2010.
18. F. Neese, *ORCA – An Ab Initio, Density Functional and Semiempirical Program Package, V. 4.2.1*; Max-Planck-Institut für Kohlenforschung: Mülheim an der Ruhr, Germany: Mülheim an der Ruhr, Germany, 2019.
19. Y. Zhao, D. G. Truhlar, *J. Chem. Phys.*, 2006, **125**, 1–18.
20. F. Weigend, R. Ahlrichs, *Phys. Chem. Chem. Phys.*, 2005, **7**, 3297-3305.
21. A. D. Becke, *Phys. Rev. A*, 1988, **38**, 3098-3100.
22. J. C. Slater, *Quantum Theory of Molecules and Solids. Vol. 4. The Self-Consistent Field for Molecules and Solids*. New York: McGraw-Hill, 1974. 640 p.
23. S. H. Vosko, L. Willk, M. Nusair, *Can. J. Phys.*, 1980, **58**, 1200-1211.
24. A. D. Becke, *J. Chem. Phys.*, 1993, **98**, 5648-5652.
25. S. Grimme, J. Antony, S. Ehrlich, H. Krieg, *J. Chem. Phys.*, 2010, **132**, 154104.
26. S. Grimme, S. Ehrlich, L. Goerigk, *J. Comp. Chem.*, 2011, **32**, 1456-65.
27. N. Mardirossian, M. Head-Gordon, *J. Chem. Phys.* 2016, **144**, 214110.
28. B. Chan, P. M. W. Gill, M. Kimura, *J. Chem. Theory Comput.*, 2019, **15**, 3610–3622.
29. L. R. Maurer, M. Bursch, S. Grimme, A. Hansen, *J. Chem. Theory Comput.*, 2021, **17**, 6134–6151.
30. M. A. Iron, T. Janes, *J. Phys. Chem. A*, 2019, **123**, 3761–3781.
31. B. I. Dunlap, *J. Chem. Phys.*, 1983, **78**, 3140-42.
32. B. I. Dunlap, *J. Mol. Struct. (Theochem)*, 2000, **529**, 37-40.
33. F. Neese, F. Wennmohs, A. Hansen, U. Becker, *Chem. Phys.*, 2009, **356**, 98-109.
34. F. Weigend *J. Comput. Chem.* 2007, **29**, 167–175.
35. G. Scalmani, M. J. Frisch, *J. Chem. Phys.*, 2010, **132**, 114110.

- 
36. R. Dixit, M. K. Bisai, S. Yadav, V. Yadav, S. S. Sen, K. Vanka, *Organometallics*, 2021, **40**, 1104–1112.
  37. Y. Guo, C. Riplinger, U. Becker, D. G. Liakos, Y. Minenkov, L. Cavallo, F. Neese, *J. Chem. Phys.*, 2018, **148**, 011101.
  38. Y. Guo, C. Riplinger, D. G. Liakos, U. Becker, M. Saitow, F. Neese, *J. Chem. Phys.* 2020, **152**, 024116.
  39. G. L. Stoychev, A. A. Auer, F. Neese, *J. Chem. Theory Comput.* 2017, **13**, 554–562.
  40. A. Altun, F. Neese, G. Bistoni, *J. Chem. Theory Comput.* 2020, **16**, 6142–6149.
  41. F. Neese, E. F. Valeev, *J. Chem. Theory Comput.* 2011, **7**, 33–43.
